# Supplementary material for: Assembly of (hetero)aryl thioethers via simple nucleophilic aromatic substitution and Cu-catalyzed coupling reactions with (hetero)aryl chlorides and bromides under mild conditions
Source: Royal Society of Chemistry journal article supplement (doi:10.1039/d3gc02066e), 2023-01-01

**Assembly of (Hetero)aryl Thioethers via Simple  
Nucleophilic Aromatic Substitution and Cu-Catalyzed Coupling  
Reaction with (Hetero)aryl Chlorides and Bromides under Mild  
Conditions**

*Wei qi Liu, Xinghao Jin and Dawei Ma\**

**Supporting Information**

**Table of Contents**

|                                                                                                      |    |
|------------------------------------------------------------------------------------------------------|----|
| 1. General information-----                                                                          | 2  |
| 2. General procedure for ligand preparation-----                                                     | 2  |
| 3. General procedure for the formation of (hetero)aryl thioethers-----                               | 3  |
| 4. Condition screening for Cu-catalyzed arylation of thiols-----                                     | 53 |
| 5. References-----                                                                                   | 55 |
| 6. Copies of <sup>1</sup> H and <sup>13</sup> C spectrum of ligands and (hetero)aryl thioethers----- | 59 |

## 1. General information and materials

**Reagent:** All the reactions were carried out under inert atmosphere. All the solvents used for the reactions were dried according to standard procedures. All glassware was oven dried before use. All commercial materials were used as received unless otherwise noted. CuCl (99.999%, Aladdin), Cu<sub>2</sub>O (99.9%, Alfa), *t*-BuOK (>97.0%(T),TCI), K<sub>2</sub>CO<sub>3</sub> (>99.0%(T), TCI) were used. Anhydrous DMAc, DMF, DMSO, MeCN and dioxane were purchased from J&K. All the reactions were monitored by thin layer chromatography (TLC, Silica gel Merck 60 F<sub>254</sub>); The spots were visualized by UV light. Purification of products was conducted by flash chromatography on silica gel (particle size 40-63 μm, 230-400 mesh SiliaFlash<sup>®</sup> P60 (Silicycle Inc.)).

**Instruments:** NMR spectra were recorded on Bruker Ultrashield™ 400 MHz or Agilent 500 MHz. For the characterization of the observed signal multiplicities, the following abbreviations were applied: s (singlet), d (doublet), dd (double doublet), t (triplet), td (triple doublet), q (quartet), m (multiplet), as well as br (broad); High resolution ESI mass experiments were operated on a Bruker Daltonics, Inc. APEXIII 7.0 TESLA FTMS instrument.

## 2. General procedure for the preparation of ligands

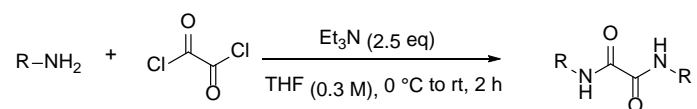

In an oven-dried round-bottom flask was charged with corresponding amine (2.0 eq.) in THF (0.3 M) was added Et<sub>3</sub>N (2.5 eq.), oxalyl chloride (1.0 eq.) was then added to the solution slowly at 0 °C. After the resulting mixture was stirred at room temperature for 2 h, it was concentrated in vacuo to remove the solvent. Water was added to the resulting residue to dissolve Et<sub>3</sub>N·HCl salt. The slurry was filtered and the solid on filter paper was washed with water and cold diethyl ether or methanol 2-3 times. These solids were dried in vacuo to afford the corresponding oxalamide. It was pure enough to be used.

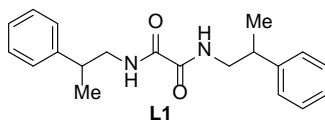

**L1** was prepared from 1-phenylpropan-2-amine and oxalyl chloride as white solid in 84% yield.  $^1\text{H}$  NMR (400 MHz,  $\text{DMSO-}d_6$ )  $\delta$  8.60 (t,  $J = 6.0$  Hz, 2H), 7.33–7.25 (m, 4H), 7.21 (d,  $J = 7.9$  Hz, 6H), 3.28 (h,  $J = 6.7, 6.3$  Hz, 4H), 3.01 (h,  $J = 7.2$  Hz, 2H), 1.15 (d,  $J = 7.0$  Hz, 6H);  $^{13}\text{C}$  NMR (101 MHz,  $\text{DMSO-}d_6$ )  $\delta$  160.3, 144.8, 128.8, 127.5, 126.8, 46.1, 39.1, 19.7; HRMS (ESI)  $m/z$  calcd. for  $\text{C}_{20}\text{H}_{24}\text{N}_2\text{O}_2$  [ $\text{M} + \text{H}$ ] $^+$  325.4240 found 325.4239.

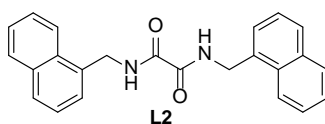

**L2** was prepared from naphthalen-1-ylmethanamine and oxalyl chloride as white solid in 91% yield.  $^1\text{H}$  NMR (500 MHz,  $\text{DMSO-}d_6$ )  $\delta$  9.39 (t,  $J = 5.8$  Hz, 2H), 8.17 (d,  $J = 7.8$  Hz, 2H), 7.93 (d,  $J = 8.8$  Hz, 2H), 7.83 (d,  $J = 8.0$  Hz, 2H), 7.53 (p,  $J = 6.4$  Hz, 4H), 7.45 (t,  $J = 7.5$  Hz, 2H), 7.40 (d,  $J = 6.9$  Hz, 2H), 4.80 (d,  $J = 6.2$  Hz, 4H);  $^{13}\text{C}$  NMR (126 MHz,  $\text{DMSO-}d_6$ )  $\delta$  160.6, 134.2, 133.7, 131.2, 129.0, 128.1, 126.7, 126.3, 125.9, 125.8, 123.9, 40.9.<sup>[1]</sup>

### 3. General procedure for the (hetero)aryl thioethers formation

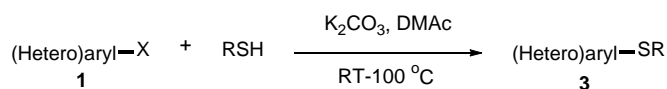

The (hetero)aryl halides (0.5 mmol),  $\text{K}_2\text{CO}_3$  (1.0 mmol, 138.2 mg), were placed into a Schlenk tube (4 mL) with a magnetic stir bar. The reaction vessel was evacuated and backfilled with nitrogen three times, then thiols (1.2 mmol) and DMAc (0.5 mL) were added (in some case, 1 eq of 18-crown-6 was added) under a positive nitrogen pressure (Note: for liquid substrates, they were added slowly after the tube was backfilled with nitrogen); The reaction mixture was heated at RT-100  $^\circ\text{C}$  for 12 h under vigorous stirring. The cooled solution was diluted with ethyl acetate and washed with brine. The organic phase was dried over  $\text{Na}_2\text{SO}_4$  and concentrated in

vacuo. The residue was purified by silica gel flash chromatography to afford the corresponding (hetero)aryl thioethers.

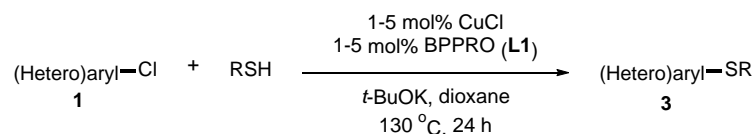

The (hetero)aryl chlorides (1.0 mmol), *t*-BuOK (2.0 mmol, 224.4 g), **L1** (0.01-0.05mmol, 3.55-17.75 mg) and CuCl (0.01-0.05 mmol, 1.0-4.95 mg) were placed into a Schlenk tube (10.0 mL) with a magnetic stir bar. The reaction vessel was evacuated and backfilled with nitrogen three times, then thiols (1.5 mmol) and Dioxane (5.0 mL) were added under a positive nitrogen pressure (Note: for liquid substrates, they were added after the tube was backfilled with nitrogen); The reaction mixture was heated at 130 °C for 24 h under vigorous stirring. The cooled solution was diluted with ethyl acetate and washed with brine. The organic phase was dried over Na<sub>2</sub>SO<sub>4</sub> and concentrated in vacuo. The residue was purified by silica gel flash chromatography to afford the corresponding (hetero)aryl thioethers.

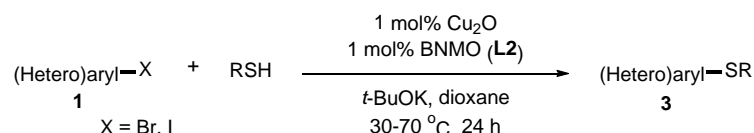

The (hetero)aryl halides (1.0 mmol), *t*-BuOK (1.7 mmol, 190.7 mg), ligand **L2** (0.01 mmol, 4.0 mg), Cu<sub>2</sub>O (0.01 mmol, 1.43 mg) were placed into a Schlenk tube (8 mL) with a magnetic stir bar. The reaction vessel was evacuated and backfilled with nitrogen three times, then thiols (1.2 mmol) and Dioxane (1.0 mL) were added under a positive nitrogen pressure (Note: for liquid substrates, they were added after the tube was backfilled with nitrogen); The reaction mixture was heated at 30-70 °C for 24 h under vigorous stirring. The cooled solution was diluted with ethyl acetate and washed with brine. The organic phase was dried over Na<sub>2</sub>SO<sub>4</sub> and concentrated in vacuo. The residue was purified by silica gel flash chromatography to afford the corresponding product.

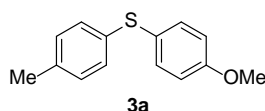

**3a**: pale yellow oil;  $^1\text{H}$  NMR (500 MHz,  $\text{CDCl}_3$ )  $\delta$  7.37 (d,  $J = 8.6$  Hz, 2H), 7.14 (d,  $J = 8.2$  Hz, 2H), 7.08 (d,  $J = 8.4$  Hz, 2H), 6.88 (d,  $J = 8.7$  Hz, 2H), 3.81 (s, 3H), 2.31 (s, 3H);  $^{13}\text{C}$  NMR (101 MHz,  $\text{CDCl}_3$ )  $\delta$  159.5, 136.1, 134.4, 129.8, 129.4, 125.7, 114.9, 55.4, 21.0.<sup>[2]</sup>

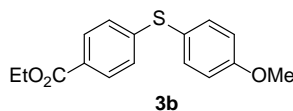

**3b**: pale yellow oil;  $^1\text{H}$  NMR (500 MHz,  $\text{CDCl}_3$ )  $\delta$  7.86 (d,  $J = 8.7$  Hz, 2H), 7.47 (d,  $J = 8.8$  Hz, 2H), 7.08 (d,  $J = 8.7$  Hz, 2H), 6.95 (d,  $J = 8.8$  Hz, 2H), 4.33 (q,  $J = 7.1$  Hz, 2H), 3.84 (s, 3H), 1.36 (t,  $J = 7.1$  Hz, 3H);  $^{13}\text{C}$  NMR (126 MHz,  $\text{CDCl}_3$ )  $\delta$  166.3, 160.6, 146.2, 136.7, 129.9, 127.0, 125.8, 121.6, 115.3, 60.9, 55.4, 14.3.<sup>[3]</sup>

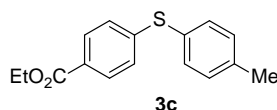

**3c**: pale yellow oil;  $^1\text{H}$  NMR (500 MHz,  $\text{CDCl}_3$ )  $\delta$  7.88 (d,  $J = 8.6$  Hz, 2H), 7.40 (d,  $J = 8.1$  Hz, 2H), 7.21 (d,  $J = 7.9$  Hz, 2H), 7.15 (d,  $J = 8.5$  Hz, 2H), 4.34 (q,  $J = 7.1$  Hz, 2H), 2.39 (s, 3H), 1.37 (t,  $J = 7.1$  Hz, 3H);  $^{13}\text{C}$  NMR (126 MHz,  $\text{CDCl}_3$ )  $\delta$  166.3, 145.2, 139.2, 134.3, 130.5, 130.0, 128.3, 127.4, 126.7, 60.9, 21.3, 14.3.<sup>[4]</sup>

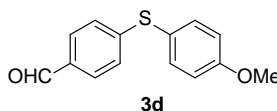

**3d**: white solid;  $^1\text{H}$  NMR (500 MHz,  $\text{CDCl}_3$ )  $\delta$  9.87 (s, 1H), 7.68 (d,  $J = 8.3$  Hz, 2H), 7.48 (d,  $J = 8.8$  Hz, 2H), 7.12 (d,  $J = 8.4$  Hz, 2H), 6.97 (d,  $J = 8.8$  Hz, 2H), 3.85 (s, 3H);  $^{13}\text{C}$  NMR (126 MHz,  $\text{CDCl}_3$ )  $\delta$  191.2, 160.9, 149.1, 137.1, 133.2, 130.1, 125.8, 120.7, 115.5, 55.4.<sup>[5]</sup>

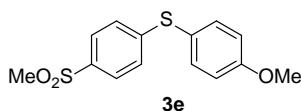

**3e**: white solid;  $^1\text{H}$  NMR (400 MHz,  $\text{CDCl}_3$ )  $\delta$  7.72 (d,  $J = 8.6$  Hz, 2H), 7.47 (d,  $J = 8.8$  Hz, 2H), 7.15 (d,  $J = 8.6$  Hz, 2H), 6.97 (d,  $J = 8.8$  Hz, 2H), 3.85 (s, 3H), 3.00 (s, 3H);  $^{13}\text{C}$  NMR (400 MHz,  $\text{CDCl}_3$ )  $\delta$  161.0, 148.4, 137.1, 136.6, 127.7, 126.1, 120.5, 115.6, 55.5, 44.7; HRMS (ESI)  $m/z$  calcd. for  $\text{C}_{14}\text{H}_{14}\text{O}_3\text{S}_2$   $[\text{M} + \text{Na}]^+$  317.0384 found 317.0277.

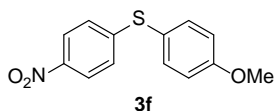

**3f:** light yellow solid;  $^1\text{H}$  NMR (500 MHz,  $\text{CDCl}_3$ )  $\delta$  8.04 (d,  $J = 9.1$  Hz, 2H), 7.49 (d,  $J = 8.9$  Hz, 2H), 7.09 (d,  $J = 9.1$  Hz, 2H), 6.99 (d,  $J = 8.9$  Hz, 2H), 3.87 (s, 3H);  $^{13}\text{C}$  NMR (126 MHz,  $\text{CDCl}_3$ )  $\delta$  161.1, 150.1, 145.0, 137.2, 125.5, 124.0, 120.1, 115.7, 55.5.<sup>[6]</sup>

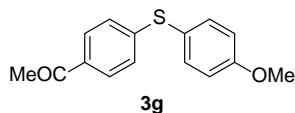

**3g:** white solid;  $^1\text{H}$  NMR (400 MHz,  $\text{CDCl}_3$ )  $\delta$  7.78 (d,  $J = 8.5$  Hz, 2H), 7.47 (d,  $J = 8.8$  Hz, 2H), 7.09 (d,  $J = 8.5$  Hz, 2H), 6.96 (d,  $J = 8.8$  Hz, 2H), 3.85 (s, 3H), 2.53 (s, 3H);  $^{13}\text{C}$  NMR (101 MHz,  $\text{CDCl}_3$ )  $\delta$  197.2, 160.7, 146.9, 136.8, 133.8, 128.8, 125.7, 121.3, 115.4, 55.4, 26.4.<sup>[7]</sup>

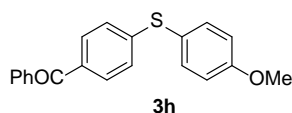

**3h:** pale red oil;  $^1\text{H}$  NMR (400 MHz,  $\text{CDCl}_3$ )  $\delta$  7.75 (d,  $J = 7.7$  Hz, 2H), 7.67 (d,  $J = 8.3$  Hz, 2H), 7.56 (t,  $J = 7.0$  Hz, 1H), 7.50 (d,  $J = 8.9$  Hz, 2H), 7.45 (t,  $J = 7.7$  Hz, 2H), 7.12 (d,  $J = 8.3$  Hz, 2H), 6.96 (d,  $J = 8.8$  Hz, 2H), 3.84 (s, 3H);  $^{13}\text{C}$  NMR (101 MHz,  $\text{CDCl}_3$ )  $\delta$  195.8, 160.7, 146.3, 137.8, 136.9, 134.1, 132.2, 130.7, 129.9, 128.3, 125.7, 121.5, 115.4, 55.5.<sup>[8]</sup>

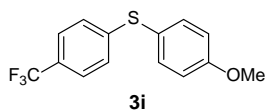

**3i:** pale yellow oil;  $^1\text{H}$  NMR (500 MHz,  $\text{CDCl}_3$ )  $\delta$  7.47 (d,  $J = 8.8$  Hz, 2H), 7.43 (d,  $J = 8.3$  Hz, 2H), 7.13 (d,  $J = 8.2$  Hz, 2H), 6.96 (d,  $J = 8.8$  Hz, 2H), 3.85 (s, 3H);  $^{13}\text{C}$  NMR (126 MHz,  $\text{CDCl}_3$ )  $\delta$  160.6, 144.8, 136.7, 127.1 (q,  $J = 32.6$  Hz), 126.3, 125.6 (q,  $J = 3.7$  Hz), 124.2 (q,  $J = 271.7$  Hz), 121.6, 115.4, 55.4;  $^{19}\text{F}$  NMR (376 MHz,  $\text{CDCl}_3$ )  $\delta$  -62.4 (s).<sup>[9]</sup>

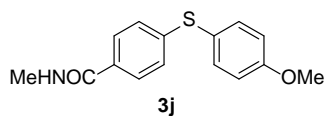

**3j**: white solid;  $^1\text{H}$  NMR (500 MHz,  $\text{DMSO-}d_6$ )  $\delta$  8.36 (d,  $J = 4.4$  Hz, 1H), 7.71 (d,  $J = 8.3$  Hz, 2H), 7.45 (d,  $J = 8.5$  Hz, 2H), 7.09 (d,  $J = 8.3$  Hz, 2H), 7.03 (d,  $J = 8.6$  Hz, 2H), 3.78 (s, 3H), 2.74 (d,  $J = 4.5$  Hz, 3H);  $^{13}\text{C}$  NMR (126 MHz,  $\text{DMSO-}d_6$ )  $\delta$  166.4, 160.6, 142.7, 136.7, 132.1, 128.3, 126.5, 121.7, 116.0, 55.8, 26.7; HRMS (EI)  $m/z$  calcd. for  $\text{C}_{15}\text{H}_{15}\text{NO}_2\text{S}$   $[\text{M}]^+$  273.0823 found 273.0822.

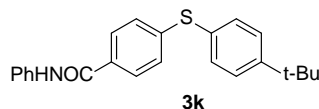

**3k**: white solid;  $^1\text{H}$  NMR (400 MHz,  $\text{CDCl}_3$ )  $\delta$  7.76 (s, 1H), 7.73 (d,  $J = 8.5$  Hz, 2H), 7.61 (d,  $J = 8.7$  Hz, 2H), 7.42 (s, 4H), 7.36 (t,  $J = 8.0$  Hz, 2H), 7.25 (d,  $J = 9.4$  Hz, 2H), 7.14 (t,  $J = 7.9$  Hz, 1H), 1.34 (s, 9H);  $^{13}\text{C}$  NMR (101 MHz,  $\text{CDCl}_3$ )  $\delta$  165.1, 152.2, 143.7, 137.9, 133.6, 131.8, 129.1, 128.7, 127.8, 127.6, 126.8, 124.6, 120.2, 34.8, 31.3; HRMS (ESI)  $m/z$  calcd. for  $\text{C}_{23}\text{H}_{23}\text{NOS}$   $[\text{M} + \text{H}]^+$  362.1500 found 362.1581.

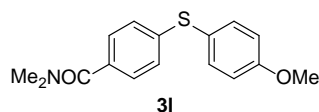

**3l**: yellow oil;  $^1\text{H}$  NMR (400 MHz,  $\text{CDCl}_3$ )  $\delta$  7.37 (d,  $J = 8.5$  Hz, 2H), 7.21 (d,  $J = 8.4$  Hz, 2H), 7.04 (d,  $J = 8.1$  Hz, 2H), 6.85 (d,  $J = 8.6$  Hz, 2H), 3.76 (s, 3H), 2.95 (d,  $J = 36.4$  Hz, 6H);  $^{13}\text{C}$  NMR (101 MHz,  $\text{CDCl}_3$ )  $\delta$  170.2, 159.3, 140.4, 135.1, 132.1, 126.8, 125.9, 121.8, 114.17, 54.4, 38.6, 34.4; HRMS (ESI)  $m/z$  calcd. for  $\text{C}_{16}\text{H}_{17}\text{NO}_2\text{S}$   $[\text{M} + \text{H}]^+$  288.0980 found 288.1053.

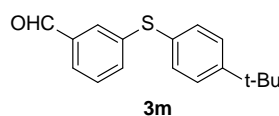

**3m**: pale yellow oil;  $^1\text{H}$  NMR (500 MHz,  $\text{CDCl}_3$ )  $\delta$  9.93 (s, 1H), 7.74 (t,  $J = 1.8$  Hz, 1H), 7.68 (dt,  $J = 7.5, 1.4$  Hz, 1H), 7.48 (dt,  $J = 7.8, 1.6$  Hz, 1H), 7.42 (t,  $J = 7.6$  Hz, 1H), 7.39 (d,  $J = 1.7$  Hz, 4H), 1.33 (s, 9H);  $^{13}\text{C}$  NMR (126 MHz,  $\text{CDCl}_3$ )  $\delta$  191.8, 151.7, 140.0, 139.5, 137.0, 134.7, 132.7, 130.0, 129.6, 127.3, 126.7, 34.7, 31.2; HRMS (ESI)  $m/z$  calcd. for  $\text{C}_{17}\text{H}_{18}\text{OS}$   $[\text{M} + \text{H}]^+$  293.1078 found 293.0971.

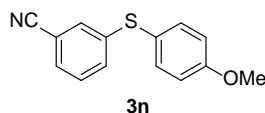

**3n**: white solid;  $^1\text{H}$  NMR (500 MHz,  $\text{CDCl}_3$ )  $\delta$  7.45 (d,  $J = 8.9$  Hz, 2H), 7.36 (d,  $J = 7.0$  Hz, 1H), 7.33–7.27 (m, 2H), 7.25 (s, 1H), 6.96 (d,  $J = 8.8$  Hz, 2H), 3.85 (s, 3H);  $^{13}\text{C}$  NMR (126 MHz,  $\text{CDCl}_3$ )  $\delta$  160.8, 142.1, 136.7, 130.9, 129.6, 129.3, 128.6, 121.2, 118.5, 115.6, 113.1, 55.4.<sup>[8]</sup>

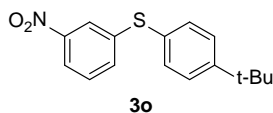

**3o**: light yellow oil;  $^1\text{H}$  NMR (400 MHz,  $\text{CDCl}_3$ )  $\delta$  8.02 (t,  $J = 1.9$  Hz, 1H), 7.98 (ddd,  $J = 8.0, 2.1, 1.0$  Hz, 1H), 7.48–7.45 (m, 1H), 7.43 (s, 4H), 7.39 (t,  $J = 8.0$  Hz, 1H), 1.35 (s, 9H);  $^{13}\text{C}$  NMR (101 MHz,  $\text{CDCl}_3$ )  $\delta$  152.6, 148.7, 141.3, 133.8, 133.6, 129.6, 128.2, 127.0, 122.7, 120.6, 34.8, 31.2; HRMS (EI)  $m/z$  calcd. for  $\text{C}_{16}\text{H}_{17}\text{NO}_2\text{S}$   $[\text{M}]^+$  287.0980 found 287.0987.

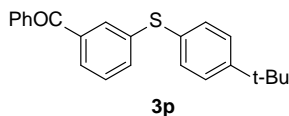

**3p**: pale yellow oil;  $^1\text{H}$  NMR (500 MHz,  $\text{CDCl}_3$ )  $\delta$  7.76 (d,  $J = 7.7$  Hz, 2H), 7.66 (s, 1H), 7.61 (d,  $J = 7.6$  Hz, 1H), 7.57 (t,  $J = 7.1$  Hz, 1H), 7.45 (t,  $J = 7.8$  Hz, 3H), 7.38 (d,  $J = 3.5$  Hz, 5H), 1.32 (s, 9H);  $^{13}\text{C}$  NMR (126 MHz,  $\text{CDCl}_3$ )  $\delta$  196.0, 151.4, 138.3, 138.3, 137.2, 132.9, 132.6, 132.5, 130.6, 130.1, 130.1, 129.0, 128.3, 127.8, 126.6, 34.7, 31.3; HRMS (EI)  $m/z$  calcd. for  $\text{C}_{23}\text{H}_{22}\text{OS}$   $[\text{M}]^+$  346.1391 found 346.1392.

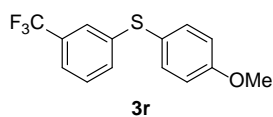

**3r**: yellow oil;  $^1\text{H}$  NMR (400 MHz,  $\text{CDCl}_3$ )  $\delta$  7.45 (d,  $J = 8.9$  Hz, 2H), 7.37 (s, 1H), 7.33 (d,  $J = 5.3$  Hz, 1H), 7.30 (d,  $J = 7.5$  Hz, 1H), 7.24 (d,  $J = 8.0$  Hz, 1H), 6.94 (d,  $J = 8.9$  Hz, 2H), 3.84 (s, 3H);  $^{13}\text{C}$  NMR (101 MHz,  $\text{CDCl}_3$ )  $\delta$  159.4, 139.8, 135.2, 130.3 (q,  $J = 32.3$  Hz), 129.3 (q,  $J = 1.4$  Hz), 128.2, 122.8 (q,  $J = 272.7$  Hz), 122.8 (q,  $J = 3.9$  Hz), 121.3, 121.1 (q,  $J = 3.8$  Hz), 114.3;  $^{19}\text{F}$  NMR (376 MHz,  $\text{CDCl}_3$ )  $\delta$  -62.8 (s).<sup>[10]</sup>



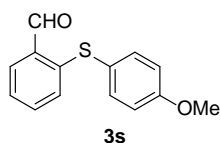

**3s:** white solid;  $^1\text{H}$  NMR (400 MHz,  $\text{CDCl}_3$ )  $\delta$  10.32 (s, 1H), 7.81 (d,  $J = 7.6$  Hz, 1H), 7.44 (d,  $J = 8.8$  Hz, 2H), 7.32 (t,  $J = 8.5$  Hz, 1H), 7.23 (t,  $J = 9.0$  Hz, 1H), 6.95 (d,  $J = 8.8$  Hz, 2H), 6.90 (d,  $J = 8.0$  Hz, 1H), 3.84 (s, 3H);  $^{13}\text{C}$  NMR (101 MHz,  $\text{CDCl}_3$ )  $\delta$  191.5, 160.6, 144.1, 136.7, 133.9, 132.8, 132.5, 128.0, 125.1, 122.1, 115.5, 55.4.<sup>[11]</sup>

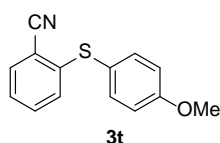

**3t:** white solid;  $^1\text{H}$  NMR (400 MHz,  $\text{CDCl}_3$ )  $\delta$  7.58 (d,  $J = 8.8$  Hz, 1H), 7.47 (d,  $J = 8.8$  Hz, 2H), 7.34 (t,  $J = 7.1$  Hz, 1H), 7.17 (t,  $J = 7.6$  Hz, 1H), 6.95 (d,  $J = 8.8$  Hz, 2H), 6.92 (d,  $J = 8.2$  Hz, 1H), 3.84 (s, 3H);  $^{13}\text{C}$  NMR (101 MHz,  $\text{CDCl}_3$ )  $\delta$  160.8, 144.6, 136.8, 133.4, 132.8, 127.8, 125.5, 120.8, 117.0, 115.5, 110.8, 55.4.<sup>[6]</sup>

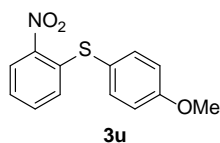

**3u:** light yellow solid;  $^1\text{H}$  NMR (400 MHz,  $\text{CDCl}_3$ )  $\delta$  8.22 (d,  $J = 9.5$  Hz, 1H), 7.49 (d,  $J = 8.7$  Hz, 2H), 7.33 (t,  $J = 8.4$  Hz, 1H), 7.18 (t,  $J = 8.3$  Hz, 1H), 7.00 (d,  $J = 8.7$  Hz, 2H), 6.83 (d,  $J = 9.1$  Hz, 1H), 3.87 (s, 3H);  $^{13}\text{C}$  NMR (101 MHz,  $\text{CDCl}_3$ )  $\delta$  161.2, 144.6, 140.7, 137.7, 133.4, 127.9, 125.8, 124.7, 121.2, 115.7, 55.5.<sup>[12]</sup>

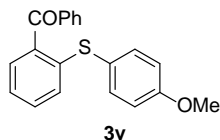

**3v:** yellow oil;  $^1\text{H}$  NMR (500 MHz,  $\text{CDCl}_3$ )  $\delta$  7.82 (d,  $J = 7.5$  Hz, 2H), 7.58 (t,  $J = 7.4$  Hz, 1H), 7.46 (t,  $J = 7.6$  Hz, 2H), 7.42–7.36 (m, 3H), 7.28 (t,  $J = 7.7$  Hz, 1H), 7.16 (t,  $J = 7.4$  Hz, 1H), 7.05 (d,  $J = 8.0$  Hz, 1H), 6.87 (d,  $J = 8.7$  Hz, 2H), 3.80 (s, 3H);  $^{13}\text{C}$  NMR (126 MHz,  $\text{CDCl}_3$ )  $\delta$  196.6, 160.2, 140.2, 137.5, 137.0, 136.3, 133.0,

131.0, 130.2, 130.0, 129.2, 128.4, 124.7, 123.8, 115.1, 55.4; HRMS (ESI)  $m/z$  calcd. for  $C_{20}H_{16}O_2S$   $[M + H]^+$  321.0871 found 321.0944.

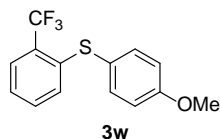

**3w**: pink solid;  $^1H$  NMR (500 MHz,  $CDCl_3$ )  $\delta$  7.63 (d,  $J = 7.8$  Hz, 1H), 7.46 (d,  $J = 8.6$  Hz, 2H), 7.29 (t,  $J = 7.7$  Hz, 1H), 7.19 (t,  $J = 7.5$  Hz, 1H), 6.98 (d,  $J = 8.0$  Hz, 1H), 6.95 (d,  $J = 8.6$  Hz, 2H), 3.85 (s, 3H);  $^{13}C$  NMR (126 MHz,  $CDCl_3$ )  $\delta$  160.5, 139.2, 136.8, 131.9, 129.6, 127.5 (q,  $J = 30.5$  Hz), 126.5 (q,  $J = 5.6$  Hz), 125.1, 124.0 (q,  $J = 273.8$  Hz), 122.3, 115.3, 55.4;  $^{19}F$  NMR (376 MHz,  $CDCl_3$ )  $\delta$  -61.2 (s).<sup>[13]</sup>

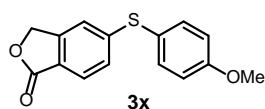

**3x**: white solid;  $^1H$  NMR (400 MHz,  $CDCl_3$ )  $\delta$  7.71 (d,  $J = 8.2$  Hz, 1H), 7.49 (d,  $J = 8.9$  Hz, 2H), 7.19 (d,  $J = 8.1$  Hz, 1H), 7.02 (s, 1H), 6.98 (d,  $J = 8.7$  Hz, 2H), 5.17 (s, 2H), 3.86 (s, 3H);  $^{13}C$  NMR (101 MHz,  $CDCl_3$ )  $\delta$  170.6, 161.0, 149.1, 147.4, 137.1, 126.6, 125.7, 122.4, 120.7, 118.5, 115.6, 69.1, 55.4.<sup>[14]</sup>

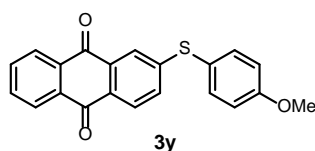

**3y**: light yellow solid;  $^1H$  NMR (400 MHz,  $CDCl_3$ )  $\delta$  8.31–8.20 (m, 2H), 8.11 (d,  $J = 8.3$  Hz, 1H), 7.92 (s, 1H), 7.82–7.71 (m, 2H), 7.52 (d,  $J = 8.5$  Hz, 2H), 7.36 (d,  $J = 10.0$  Hz, 1H), 7.00 (d,  $J = 8.5$  Hz, 2H), 3.88 (s, 3H);  $^{13}C$  NMR (101 MHz,  $CDCl_3$ )  $\delta$  181.9, 181.4, 160.0, 148.4, 136.1, 133.2, 132.9, 132.6, 132.5, 132.3, 129.5, 129.1, 126.8, 126.2, 126.1, 122.6, 119.2, 114.6, 54.4; HRMS (ESI)  $m/z$  calcd. for  $C_{21}H_{14}O_3S$   $[M + H]^+$  347.0664 found 347.0737.

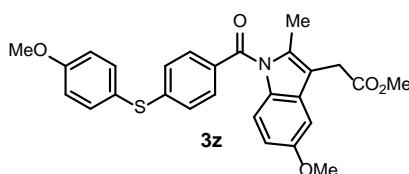

**3z:** pale yellow oil;  $^1\text{H}$  NMR (500 MHz,  $\text{CDCl}_3$ )  $\delta$  7.55 (d,  $J = 8.2$  Hz, 2H), 7.50 (d,  $J = 7.9$  Hz, 2H), 7.10 (d,  $J = 7.7$  Hz, 2H), 6.97 (d,  $J = 8.0$  Hz, 2H), 6.95 (d,  $J = 2.0$  Hz, 1H), 6.92 (d,  $J = 8.6$  Hz, 1H), 6.67 (dd,  $J = 9.0, 1.7$  Hz, 1H), 3.85 (s, 3H), 3.83 (s, 3H), 3.69 (s, 3H), 3.66 (s, 2H), 2.37 (s, 3H);  $^{13}\text{C}$  NMR (126 MHz,  $\text{CDCl}_3$ )  $\delta$  171.5, 168.8, 160.8, 155.8, 147.0, 136.9, 136.0, 131.6, 131.0, 130.5, 125.8, 121.0, 115.4, 114.9, 111.9, 111.5, 110.9, 101.1, 55.7, 55.4, 52.1, 30.2, 13.2; HRMS (ESI)  $m/z$  calcd. for  $\text{C}_{27}\text{H}_{25}\text{NO}_5\text{S}$   $[\text{M} + \text{H}]^+$  476.1453 found 476.1534.

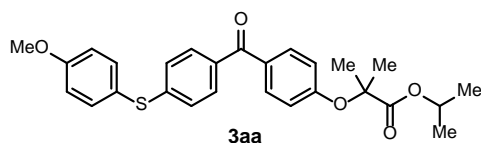

**3aa:** pale yellow solid;  $^1\text{H}$  NMR (400 MHz,  $\text{CDCl}_3$ )  $\delta$  7.70 (d,  $J = 8.7$  Hz, 2H), 7.60 (d,  $J = 8.3$  Hz, 2H), 7.47 (d,  $J = 8.7$  Hz, 2H), 7.10 (d,  $J = 8.3$  Hz, 2H), 6.94 (d,  $J = 8.7$  Hz, 2H), 6.84 (d,  $J = 8.7$  Hz, 2H), 5.07 (hept,  $J = 6.1$  Hz, 1H), 3.82 (s, 3H), 1.64 (s, 6H), 1.18 (d,  $J = 6.3$  Hz, 6H);  $^{13}\text{C}$  NMR (101 MHz,  $\text{CDCl}_3$ )  $\delta$  193.5, 172.1, 159.6, 158.4, 144.5, 135.7, 133.6, 130.8, 129.7, 129.4, 124.7, 120.6, 116.2, 114.3, 78.3, 68.2, 54.4, 24.3, 20.5; HRMS (ESI)  $m/z$  calcd. for  $\text{C}_{27}\text{H}_{28}\text{O}_5\text{S}$   $[\text{M} + \text{H}]^+$  465.1657 found 465.1729.

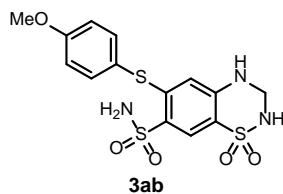

**3ab:** pale yellow solid;  $^1\text{H}$  NMR (500 MHz,  $\text{DMSO}-d_6$ )  $\delta$  7.93 (s, 1H), 7.75 (t,  $J = 8.0$  Hz, 2H), 7.51 (d,  $J = 8.8$  Hz, 2H), 7.40 (s, 2H), 7.11 (d,  $J = 8.8$  Hz, 2H), 6.12 (s, 1H), 4.57 (dd,  $J = 8.1, 2.4$  Hz, 2H), 3.82 (s, 3H);  $^{13}\text{C}$  NMR (101 MHz,  $\text{DMSO}-d_6$ )  $\delta$  161.1, 146.1, 144.6, 137.8, 127.6, 125.2, 121.0, 117.3, 116.3, 113.5, 55.8, 54.6; HRMS (EI)  $m/z$  calcd. for  $\text{C}_{14}\text{H}_{15}\text{N}_3\text{O}_5\text{S}_3$   $[\text{M}]^+$  401.0174 found 401.0177.

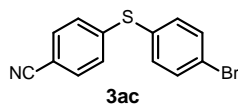

**3ac**: white solid;  $^1\text{H}$  NMR (400 MHz,  $\text{CDCl}_3$ )  $\delta$  7.55 (d,  $J = 8.4$  Hz, 2H), 7.50 (d,  $J = 8.6$  Hz, 2H), 7.35 (d,  $J = 8.4$  Hz, 2H), 7.18 (d,  $J = 8.7$  Hz, 2H);  $^{13}\text{C}$  NMR (101 MHz,  $\text{CDCl}_3$ )  $\delta$  144.7, 135.7, 133.1, 132.5, 130.3, 127.7, 123.8, 118.6, 109.2.<sup>[18]</sup>

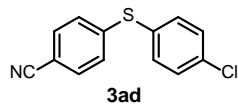

**3ad**: colorless solid;  $^1\text{H}$  NMR (400 MHz,  $\text{CDCl}_3$ )  $\delta$  7.49 (d,  $J = 8.6$  Hz, 2H), 7.41 (q,  $J = 8.8$  Hz, 4H), 7.17 (d,  $J = 8.7$  Hz, 2H);  $^{13}\text{C}$  NMR (101 MHz,  $\text{CDCl}_3$ )  $\delta$  144.9, 135.7, 135.6, 132.5, 130.1, 129.5, 127.5, 118.6, 109.1.<sup>[19]</sup>

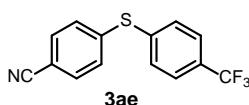

**3ae**: colorless oil;  $^1\text{H}$  NMR (400 MHz,  $\text{CDCl}_3$ )  $\delta$  7.63 (d,  $J = 8.2$  Hz, 2H), 7.56 (d,  $J = 8.3$  Hz, 2H), 7.53 (d,  $J = 8.2$  Hz, 2H), 7.32 (d,  $J = 8.3$  Hz, 2H);  $^{13}\text{C}$  NMR (101 MHz,  $\text{CDCl}_3$ )  $\delta$  141.6, 136.5, 131.7, 131.6, 129.6 (q,  $J = 33.0$  Hz), 128.5, 125.5 (q,  $J = 3.8$  Hz), 122.7 (q,  $J = 272.3$  Hz), 117.4, 109.3;  $^{19}\text{F}$  NMR (376 MHz,  $\text{CDCl}_3$ )  $\delta$  -62.8 (s); HRMS (ESI)  $m/z$  calcd. for  $\text{C}_{14}\text{H}_8\text{F}_3\text{NS}$  [ $\text{M} + \text{H}$ ]<sup>+</sup> Exact 280.0330 found 280.0403.

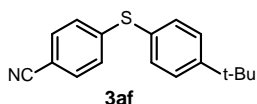

**3af**: yellow oil;  $^1\text{H}$  NMR (400 MHz,  $\text{CDCl}_3$ )  $\delta$  7.46 (d,  $J = 9.0$  Hz, 6H), 7.14 (d,  $J = 8.4$  Hz, 2H), 1.35 (s, 9H);  $^{13}\text{C}$  NMR (101 MHz,  $\text{CDCl}_3$ )  $\delta$  153.0, 146.4, 134.5, 132.3, 127.0, 126.9, 126.8, 118.9, 108.3, 34.8, 31.2.<sup>[16]</sup>

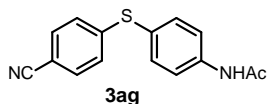

**3ag**: white solid;  $^1\text{H}$  NMR (400 MHz,  $\text{CDCl}_3$ )  $\delta$  8.18 (s, 1H), 7.63 (d,  $J = 8.5$  Hz, 2H), 7.43 (d,  $J = 8.5$  Hz, 4H), 7.09 (d,  $J = 8.6$  Hz, 2H), 2.20 (s, 3H);  $^{13}\text{C}$  NMR (101 MHz,  $\text{CDCl}_3$ )  $\delta$  169.1, 146.6, 139.6, 135.8, 132.3, 126.6, 124.7, 121.0, 118.9, 108.1, 24.6; HRMS (ESI)  $m/z$  calcd. for  $\text{C}_{15}\text{H}_{12}\text{N}_2\text{OS}$  [ $\text{M} + \text{H}$ ]<sup>+</sup> Exact 269.0670 found 269.0731.

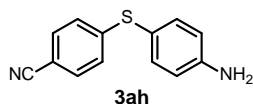

**3ah:** yellow solid;  $^1\text{H}$  NMR (400 MHz,  $\text{CDCl}_3$ )  $\delta$  7.42 (d,  $J = 8.4$  Hz, 2H), 7.31 (d,  $J = 8.5$  Hz, 2H), 7.05 (d,  $J = 8.4$  Hz, 2H), 6.72 (d,  $J = 8.5$  Hz, 2H), 3.95 (s, 2H);  $^{13}\text{C}$  NMR (101 MHz,  $\text{CDCl}_3$ )  $\delta$  148.3, 148.2, 137.2, 132.1, 125.7, 119.1, 116.6, 116.1, 107.6; HRMS (ESI)  $m/z$  calcd. for  $\text{C}_{13}\text{H}_{10}\text{N}_2\text{S}$   $[\text{M} + \text{H}]^+$  227.0565 found 227.0638

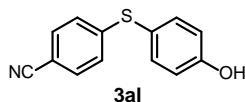

**3ai:** white solid;  $^1\text{H}$  NMR (400 MHz,  $\text{DMSO-}d_6$ )  $\delta$  10.09 (s, 1H), 7.66 (d,  $J = 8.4$  Hz, 2H), 7.39 (d,  $J = 8.5$  Hz, 2H), 7.09 (d,  $J = 8.4$  Hz, 2H), 6.91 (d,  $J = 8.5$  Hz, 2H);  $^{13}\text{C}$  NMR (101 MHz,  $\text{DMSO-}d_6$ )  $\delta$  159.8, 147.6, 137.8, 133.1, 126.0, 119.3, 117.7, 117.5, 107.5; HRMS (ESI)  $m/z$  calcd. for  $\text{C}_{13}\text{H}_9\text{NOS}$   $[\text{M} + \text{H}]^+$  228.0405 found 228.0478.

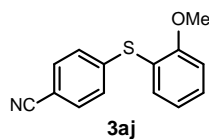

**3aj:** white oil;  $^1\text{H}$  NMR (400 MHz,  $\text{CDCl}_3$ )  $\delta$  7.46 (dd,  $J = 12.6, 8.1$  Hz, 4H), 7.11 (d,  $J = 8.4$  Hz, 2H), 7.01 (t,  $J = 7.3$  Hz, 2H), 3.81 (s, 3H);  $^{13}\text{C}$  NMR (101 MHz,  $\text{CDCl}_3$ )  $\delta$  159.6, 145.1, 136.6, 132.2, 131.7, 126.8, 121.6, 119.0, 118.0, 111.7, 108.2, 55.9.<sup>[6]</sup>

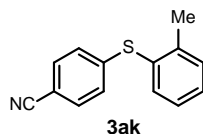

**3ak:** yellow oil;  $^1\text{H}$  NMR (400 MHz,  $\text{CDCl}_3$ )  $\delta$  7.52 (d,  $J = 7.7$  Hz, 1H), 7.45 (d,  $J = 7.0$  Hz, 2H), 7.37 (d,  $J = 6.6$  Hz, 2H), 7.26 (t,  $J = 7.1$  Hz, 1H), 7.04 (d,  $J = 8.6$  Hz, 2H), 2.36 (s, 3H);  $^{13}\text{C}$  NMR (101 MHz,  $\text{CDCl}_3$ )  $\delta$  145.6, 142.5, 136.4, 132.4, 131.3, 130.3, 129.2, 127.4, 126.4, 118.9, 108.2, 20.7.<sup>[9]</sup>

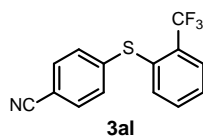

**3al**: yellow oil;  $^1\text{H}$  NMR (400 MHz,  $\text{CDCl}_3$ )  $\delta$  7.82 (d,  $J = 7.3$  Hz, 1H), 7.61–7.44 (m, 5H), 7.17 (d,  $J = 8.1$  Hz, 2H);  $^{13}\text{C}$  NMR (101 MHz,  $\text{CDCl}_3$ )  $\delta$  144.22, 137.41, 132.88, 132.79 (q,  $J = 30.4$  Hz), 132.5, 130.7, 129.4, 128.5, 127.5 (q,  $J = 5.5$  Hz), 123.3 (q,  $J = 273.9$  Hz), 118.5, 109.6;  $^{19}\text{F}$  NMR (376 MHz,  $\text{CDCl}_3$ )  $\delta$  -60.5 (s); HRMS (ESI)  $m/z$  calcd. for  $\text{C}_{14}\text{H}_8\text{F}_3\text{NS}$   $[\text{M} + \text{H}]^+$  Exact 280.0330 found 280.0403.

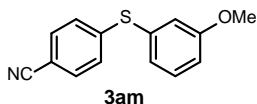

**3am**: yellow oil;  $^1\text{H}$  NMR (400 MHz,  $\text{CDCl}_3$ )  $\delta$  7.48 (d,  $J = 8.2$  Hz, 2H), 7.33 (t,  $J = 8.0$  Hz, 1H), 7.19 (d,  $J = 8.3$  Hz, 2H), 7.08 (d,  $J = 8.3$  Hz, 1H), 7.03 (s, 1H), 6.96 (d,  $J = 7.5$  Hz, 1H), 3.80 (s, 3H);  $^{13}\text{C}$  NMR (101 MHz,  $\text{CDCl}_3$ )  $\delta$  160.5, 145.5, 132.4, 131.9, 130.7, 127.5, 126.4, 119.4, 118.8, 115.2, 108.8, 55.4.<sup>[6]</sup>

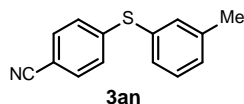

**3an**: pale yellow oil;  $^1\text{H}$  NMR (400 MHz,  $\text{CDCl}_3$ )  $\delta$  7.47 (d,  $J = 8.7$  Hz, 2H), 7.36–7.29 (m, 3H), 7.26–7.22 (m, 1H), 7.15 (d,  $J = 8.7$  Hz, 2H), 2.37 (s, 3H);  $^{13}\text{C}$  NMR (101 MHz,  $\text{CDCl}_3$ )  $\delta$  146.0, 139.9, 135.1, 132.3, 131.6, 130.3, 130.3, 129.7, 127.2, 118.9, 108.5, 21.3.<sup>[6]</sup>

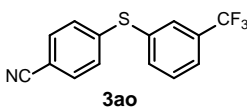

**3ao**: yellow oil;  $^1\text{H}$  NMR (400 MHz,  $\text{CDCl}_3$ )  $\delta$  7.74 (s, 1H), 7.65 (d,  $J = 7.3$  Hz, 2H), 7.58–7.50 (m, 3H), 7.25 (d,  $J = 8.3$  Hz, 2H);  $^{13}\text{C}$  NMR (101 MHz,  $\text{CDCl}_3$ )  $\delta$  142.5, 135.7 (q,  $J = 1.3$  Hz), 132.3, 131.7, 131.3 (q,  $J = 32.7$  Hz), 129.3, 129.1 (q,  $J = 3.8$  Hz), 127.5, 124.7 (q,  $J = 3.8$  Hz), 122.4 (q,  $J = 272.8$  Hz), 117.5, 108.9;  $^{19}\text{F}$  NMR (376 MHz,  $\text{CDCl}_3$ )  $\delta$  -62.8 (s).<sup>[6]</sup>

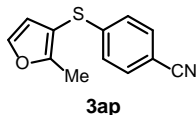

**3ap**: yellow oil;  $^1\text{H}$  NMR (400 MHz,  $\text{CDCl}_3$ )  $\delta$  7.47 (d,  $J = 8.5$  Hz, 2H), 7.43 (s, 1H), 7.11 (d,  $J = 8.5$  Hz, 2H), 6.37 (s, 1H), 2.34 (s, 3H);  $^{13}\text{C}$  NMR (101 MHz,  $\text{CDCl}_3$ )

$\delta$  156.9, 144.7, 140.9, 131.3, 124.5, 117.9, 114.2, 107.1, 104.5, 10.8; HRMS (ESI)  $m/z$  calcd. for  $C_{12}H_9NOS$   $[M + H]^+$  216.0405 found 216.0479.

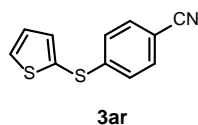

**3ar**: yellow oil;  $^1H$  NMR (400 MHz,  $CDCl_3$ )  $\delta$  7.60 (d,  $J = 5.4$  Hz, 1H), 7.48 (d,  $J = 8.6$  Hz, 2H), 7.35 (d,  $J = 3.6$  Hz, 1H), 7.17–7.15 (m, 1H), 7.13 (d,  $J = 8.6$  Hz, 2H);  $^{13}C$  NMR (101 MHz,  $CDCl_3$ )  $\delta$  146.5, 137.8, 132.9, 132.4, 128.5, 127.3, 125.8, 118.7, 108.8; HRMS (ESI)  $m/z$  calcd. for  $C_{11}H_7NS_2$   $[M + H]^+$  218.0020 found 218.0093.

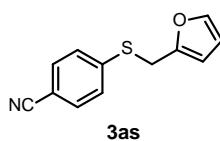

**3as**: yellow oil;  $^1H$  NMR (400 MHz,  $CDCl_3$ )  $\delta$  7.52 (d,  $J = 8.6$  Hz, 2H), 7.36 (d,  $J = 2.3$  Hz, 1H), 7.34 (d,  $J = 4.0$  Hz, 2H), 6.31–6.28 (m, 1H), 6.21 (d,  $J = 3.2$  Hz, 1H), 4.19 (s, 2H);  $^{13}C$  NMR (101 MHz,  $CDCl_3$ )  $\delta$  149.7, 143.5, 142.5, 132.2, 127.9, 118.7, 110.7, 109.0, 108.4, 29.6; HRMS (ESI)  $m/z$  calcd. for  $C_{12}H_9NOS$   $[M + H]^+$  216.0405 found 216.0478.

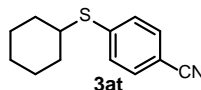

**3at**: yellow oil;  $^1H$  NMR (400 MHz,  $CDCl_3$ )  $\delta$  7.51 (d,  $J = 8.4$  Hz, 2H), 7.33 (d,  $J = 8.5$  Hz, 2H), 3.29 (t,  $J = 10.2$  Hz, 1H), 2.02 (d,  $J = 10.8$  Hz, 2H), 1.80 (d,  $J = 12.2$  Hz, 2H), 1.65 (d,  $J = 13.0$  Hz, 1H), 1.37 (tq,  $J = 23.2, 11.3, 10.9$  Hz, 5H);  $^{13}C$  NMR (101 MHz,  $CDCl_3$ )  $\delta$  143.0, 131.2, 127.5, 117.9, 107.4, 43.9, 31.9, 24.8, 24.6.<sup>[17]</sup>

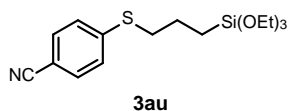

**3au**: colorless oil;  $^1H$  NMR (400 MHz,  $CDCl_3$ )  $\delta$  7.51 (d,  $J = 8.5$  Hz, 2H), 7.31 (d,  $J = 8.4$  Hz, 2H), 3.82 (q,  $J = 7.0$  Hz, 6H), 3.02 (t,  $J = 7.4$  Hz, 2H), 1.82 (dt,  $J = 15.8, 7.8$  Hz, 2H), 1.22 (t,  $J = 7.0$  Hz, 9H), 0.85–0.74 (m, 2H);  $^{13}C$  NMR (101 MHz,  $CDCl_3$ )  $\delta$  145.1, 132.2, 126.8, 119.0, 107.9, 58.5, 34.5, 22.5, 18.3, 9.9; HRMS (EI)  $m/z$  calcd. for  $C_{16}H_{25}NO_3SSi$   $[M]^+$  339.1324 found 339.1326.

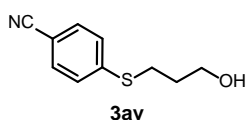

**3av**: pale yellow oil;  $^1\text{H}$  NMR (400 MHz,  $\text{CDCl}_3$ )  $\delta$  7.51 (d,  $J = 8.6$  Hz, 2H), 7.31 (d,  $J = 8.6$  Hz, 2H), 3.78 (t,  $J = 5.9$  Hz, 2H), 3.11 (t,  $J = 7.2$  Hz, 2H), 1.94 (p,  $J = 6.9$  Hz, 2H), 1.73 (s, 1H);  $^{13}\text{C}$  NMR (101 MHz,  $\text{CDCl}_3$ )  $\delta$  144.7, 132.2, 126.8, 118.9, 108.0, 60.9, 31.2, 28.3; HRMS (EI)  $m/z$  calcd. for  $\text{C}_{10}\text{H}_{11}\text{NOS}$   $[\text{M}]^+$  193.0561 found 193.0554.

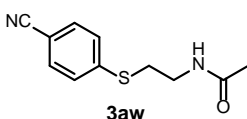

**3aw**: white solid;  $^1\text{H}$  NMR (400 MHz,  $\text{CDCl}_3$ )  $\delta$  7.52 (d,  $J = 8.5$  Hz, 2H), 7.39 (s, 2H), 6.11 (s, 1H), 3.47 (q,  $J = 6.6$  Hz, 2H), 3.14 (t,  $J = 6.8$  Hz, 2H), 1.96 (s, 3H);  $^{13}\text{C}$  NMR (101 MHz,  $\text{CDCl}_3$ )  $\delta$  170.6, 143.5, 132.4, 127.0, 118.8, 108.4, 38.6, 31.2, 23.1; HRMS (ESI)  $m/z$  calcd. for  $\text{C}_{11}\text{H}_{12}\text{N}_2\text{OS}$   $[\text{M} + \text{H}]^+$  221.0670 found 221.0744.

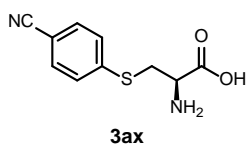

**3ax**: white solid;  $^1\text{H}$  NMR (400 MHz,  $\text{DMSO}-d_6$ )  $\delta$  13.08 (s, 1H), 7.78 (d,  $J = 8.5$  Hz, 2H), 7.53 (d,  $J = 8.5$  Hz, 2H), 5.36–5.25 (m, 1H), 3.78–3.59 (m, 2H);  $^{13}\text{C}$  NMR (101 MHz,  $\text{DMSO}-d_6$ )  $\delta$  172.1, 167.7, 136.9, 131.5, 130.2, 129.4, 78.8, 35.7.

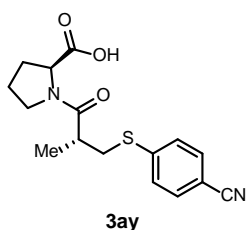

**3ay**: yellow solid, slightly impure with captopril;  $^1\text{H}$  NMR (400 MHz,  $\text{CDCl}_3$ )  $\delta$  10.27 (s, 1H), 7.54 (d,  $J = 8.0$  Hz, 2H), 7.33 (d,  $J = 8.2$  Hz, 2H), 4.52 (dd,  $J = 7.8, 4.1$  Hz, 1H), 3.65–3.29 (m, 2H), 3.11–2.77 (m, 2H), 2.35–1.86 (m, 5H), 1.30 (d,  $J = 6.8$  Hz, 3H).  $^{13}\text{C}$  NMR (101 MHz,  $\text{CDCl}_3$ )  $\delta$  174.6, 174.4, 144.2, 132.3, 127.1, 118.7, 108.5, 59.2, 47.3, 38.0, 35.1, 28.5, 24.7, 17.3; HRMS (ESI)  $m/z$  calcd. for  $\text{C}_{16}\text{H}_{18}\text{N}_2\text{O}_3\text{S}$   $[\text{M} + \text{H}]^+$  319.1038 found 319.1120.



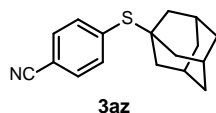

**3az:** white solid;  $^1\text{H}$  NMR (500 MHz,  $\text{CDCl}_3$ )  $\delta$  7.59 (s, 4H), 2.04 (s, 3H), 1.82 (d,  $J = 2.9$  Hz, 6H), 1.67 (d,  $J = 12.7$  Hz, 3H), 1.60 (d,  $J = 12.9$  Hz, 3H);  $^{13}\text{C}$  NMR (126 MHz,  $\text{CDCl}_3$ )  $\delta$  137.7, 137.6, 131.7, 118.6, 112.1, 49.6, 43.7, 36.0, 30.0.

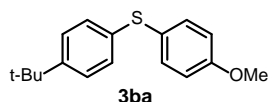

**3ba:** colorless oil;  $^1\text{H}$  NMR (400 MHz,  $\text{CDCl}_3$ )  $\delta$  7.40 (d,  $J = 8.7$  Hz, 2H), 7.28 (d,  $J = 8.4$  Hz, 2H), 7.15 (d,  $J = 8.5$  Hz, 2H), 6.89 (d,  $J = 8.7$  Hz, 2H), 3.82 (s, 3H), 1.29 (s, 9H);  $^{13}\text{C}$  NMR (101 MHz,  $\text{CDCl}_3$ )  $\delta$  159.6, 149.2, 134.8, 134.7, 128.6, 126.0, 125.1, 114.9, 55.4, 34.5, 31.3.<sup>[18]</sup>

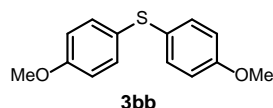

**3bb:** pale yellow oil;  $^1\text{H}$  NMR (400 MHz,  $\text{CDCl}_3$ )  $\delta$  7.40 (d,  $J = 8.6$  Hz, 4H), 6.84 (d,  $J = 8.6$  Hz, 4H), 3.80 (s, 6H);  $^{13}\text{C}$  NMR (101 MHz,  $\text{CDCl}_3$ )  $\delta$  159.9, 132.7, 128.5, 114.6, 55.4.<sup>[19]</sup>

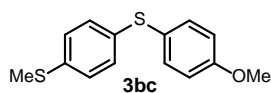

**3bc:** pale yellow solid;  $^1\text{H}$  NMR (400 MHz,  $\text{CDCl}_3$ )  $\delta$  7.38 (d,  $J = 8.8$  Hz, 2H), 7.14 (s, 4H), 6.88 (d,  $J = 8.8$  Hz, 2H), 3.81 (s, 3H), 2.45 (s, 3H);  $^{13}\text{C}$  NMR (101 MHz,  $\text{CDCl}_3$ )  $\delta$  159.7, 136.4, 134.8, 134.7, 129.5, 127.4, 125.0, 115.0, 55.4, 16.1.<sup>[20]</sup>

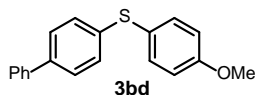

**3bd:** white solid;  $^1\text{H}$  NMR (400 MHz,  $\text{CDCl}_3$ )  $\delta$  7.55 (d,  $J = 8.5$  Hz, 2H), 7.49–7.38 (m, 6H), 7.34 (d,  $J = 7.4$  Hz, 1H), 7.23 (d,  $J = 8.4$  Hz, 2H), 6.93 (d,  $J = 8.8$  Hz, 2H), 3.84 (s, 3H);  $^{13}\text{C}$  NMR (126 MHz,  $\text{CDCl}_3$ )  $\delta$  159.9, 140.5, 138.7, 137.8, 135.5, 128.8, 128.5, 127.6, 127.3, 126.9, 124.1, 115.0, 55.4.<sup>[15]</sup>

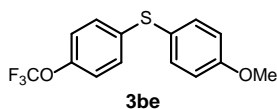

**3be**: white solid;  $^1\text{H}$  NMR (500 MHz,  $\text{CDCl}_3$ )  $\delta$  7.43 (d,  $J = 8.9$  Hz, 2H), 7.14 (d,  $J = 8.9$  Hz, 2H), 7.08 (d,  $J = 8.9$  Hz, 2H), 6.92 (d,  $J = 8.9$  Hz, 2H), 3.83 (s, 3H);  $^{13}\text{C}$  NMR (101 MHz,  $\text{CDCl}_3$ )  $\delta$  160.2, 147.2 (q,  $J = 2.0$  Hz), 137.8, 135.8, 129.0, 123.5, 121.6, 120.5 (q,  $J = 257.1$  Hz), 115.2, 55.4;  $^{19}\text{F}$  NMR (376 MHz,  $\text{CDCl}_3$ )  $\delta$  -58.1 (s).<sup>[22]</sup>

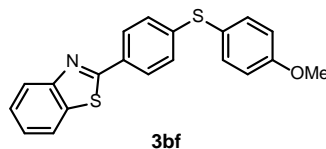

**3bf**: white solid;  $^1\text{H}$  NMR (400 MHz,  $\text{CDCl}_3$ )  $\delta$  8.02 (d,  $J = 8.2$  Hz, 1H), 7.91 (d,  $J = 8.3$  Hz, 2H), 7.85 (d,  $J = 7.9$  Hz, 1H), 7.48 (d,  $J = 8.5$  Hz, 3H), 7.34 (t,  $J = 7.5$  Hz, 1H), 7.17 (d,  $J = 8.2$  Hz, 2H), 6.94 (d,  $J = 8.5$  Hz, 2H), 3.83 (s, 3H);  $^{13}\text{C}$  NMR (101 MHz,  $\text{CDCl}_3$ )  $\delta$  167.5, 160.4, 154.1, 143.6, 136.4, 132.2, 130.6, 128.9, 127.9, 127.1, 126.3, 125.1, 123.0, 121.6, 115.3, 55.3.<sup>[23]</sup>

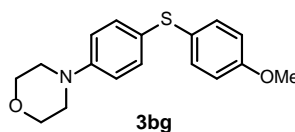

**3bg**: white solid;  $^1\text{H}$  NMR (500 MHz,  $\text{CDCl}_3$ )  $\delta$  7.27 (dd,  $J = 8.9, 2.4$  Hz, 4H), 6.83 (dd,  $J = 8.9, 1.2$  Hz, 4H), 3.86–3.82 (m, 4H), 3.78 (s, 3H), 3.17–3.11 (m, 4H);  $^{13}\text{C}$  NMR (126 MHz,  $\text{CDCl}_3$ )  $\delta$  158.8, 150.4, 132.7, 132.4, 127.7, 126.0, 116.1, 114.7, 66.8, 55.4, 48.9; HRMS (ESI)  $m/z$  calcd. for  $\text{C}_{17}\text{H}_{19}\text{NO}_2\text{S}$   $[\text{M} + \text{H}]^+$  302.1136 found 302.1209.

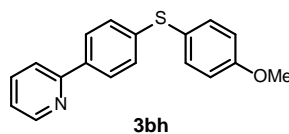

**3bh**: white solid;  $^1\text{H}$  NMR (400 MHz,  $\text{CDCl}_3$ )  $\delta$  8.66 (d,  $J = 4.3$  Hz, 1H), 7.86 (d,  $J = 8.4$  Hz, 2H), 7.73 (t,  $J = 7.7$  Hz, 1H), 7.66 (d,  $J = 8.0$  Hz, 1H), 7.45 (d,  $J = 8.8$  Hz, 2H), 7.28–7.16 (m, 3H), 6.91 (d,  $J = 8.8$  Hz, 2H), 3.82 (s, 3H);  $^{13}\text{C}$  NMR (101 MHz,  $\text{CDCl}_3$ )  $\delta$  160.0, 156.6, 149.4, 140.3, 137.0, 136.5, 135.6, 128.0, 127.4, 123.6, 122.0, 120.3, 115.1, 55.4; HRMS (ESI)  $m/z$  calcd. for  $\text{C}_{18}\text{H}_{16}\text{NOS}$   $[\text{M} + \text{H}]^+$  294.0874 found 294.0947.

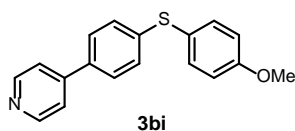

**3bi:** white solid;  $^1\text{H}$  NMR (500 MHz,  $\text{CDCl}_3$ )  $\delta$  8.62 (d,  $J = 4.9$  Hz, 2H), 7.48 (t,  $J = 9.0$  Hz, 4H), 7.44 (d,  $J = 4.7$  Hz, 2H), 7.21 (d,  $J = 7.5$  Hz, 2H), 6.94 (d,  $J = 7.7$  Hz, 2H), 3.84 (s, 3H);  $^{13}\text{C}$  NMR (126 MHz,  $\text{CDCl}_3$ )  $\delta$  160.3, 150.2, 147.6, 141.0, 136.2, 135.0, 127.8, 127.4, 122.9, 121.2, 115.2, 55.4; HRMS (ESI)  $m/z$  calcd. for  $\text{C}_{18}\text{H}_{16}\text{NOS}$   $[\text{M} + \text{H}]^+$  294.0874 found 294.0947.

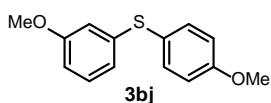

**3bj:** pale yellow oil;  $^1\text{H}$  NMR (500 MHz,  $\text{CDCl}_3$ )  $\delta$  7.44 (d,  $J = 8.9$  Hz, 2H), 7.15 (t,  $J = 7.9$  Hz, 1H), 6.91 (d,  $J = 8.8$  Hz, 2H), 6.75 (d,  $J = 8.7$  Hz, 1H), 6.72–6.65 (m, 2H), 3.83 (s, 3H), 3.74 (s, 3H);  $^{13}\text{C}$  NMR (101 MHz,  $\text{CDCl}_3$ )  $\delta$  160.0, 159.9, 140.2, 135.7, 129.7, 123.7, 120.2, 115.0, 113.3, 111.3, 55.4, 55.2.<sup>[24]</sup>

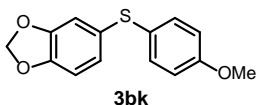

**3bk:** colorless oil;  $^1\text{H}$  NMR (500 MHz,  $\text{CDCl}_3$ )  $\delta$  7.32 (d,  $J = 8.6$  Hz, 2H), 6.86 (d,  $J = 8.5$  Hz, 2H), 6.83 (s, 1H), 6.77 (s, 1H), 6.73 (d,  $J = 8.1$  Hz, 1H), 5.94 (s, 2H), 3.80 (s, 3H);  $^{13}\text{C}$  NMR (126 MHz,  $\text{CDCl}_3$ )  $\delta$  159.3, 148.2, 146.9, 133.5, 129.6, 126.6, 124.3, 114.8, 111.2, 108.8, 101.3, 55.4; HRMS (EI)  $m/z$  calcd. for  $\text{C}_{14}\text{H}_{12}\text{O}_3\text{S}$   $[\text{M}]^+$  260.0507 found 260.0508.

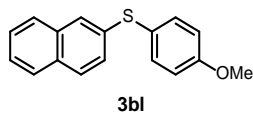

**3bl:** white solid;  $^1\text{H}$  NMR (400 MHz,  $\text{CDCl}_3$ )  $\delta$  7.79 (d,  $J = 8.9$  Hz, 1H), 7.74 (d,  $J = 8.7$  Hz, 1H), 7.70 (d,  $J = 7.4$  Hz, 1H), 7.64 (s, 1H), 7.49 (d,  $J = 8.9$  Hz, 2H), 7.48–7.40 (m, 2H), 7.33 (dd,  $J = 8.6, 1.9$  Hz, 1H), 6.95 (d,  $J = 8.9$  Hz, 2H), 3.86 (s, 3H);  $^{13}\text{C}$  NMR (101 MHz,  $\text{CDCl}_3$ )  $\delta$  159.8, 135.9, 135.2, 133.8, 131.7, 128.6, 127.7, 127.2, 126.7, 126.5, 126.4, 125.6, 124.4, 115.0, 55.4.<sup>[25]</sup>

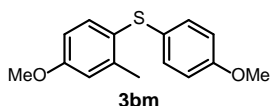

**3bm:** pale yellow oil;  $^1\text{H}$  NMR (500 MHz,  $\text{CDCl}_3$ )  $\delta$  7.26 (d,  $J = 8.5$  Hz, 1H), 7.13 (d,  $J = 8.8$  Hz, 2H), 6.81 (d,  $J = 8.7$  Hz, 3H), 6.69 (dd,  $J = 8.5, 2.8$  Hz, 1H), 3.79 (s, 3H), 3.77 (s, 3H), 2.35 (s, 3H);  $^{13}\text{C}$  NMR (126 MHz,  $\text{CDCl}_3$ )  $\delta$  159.5, 158.4, 141.8, 134.8, 131.0, 127.7, 125.5, 116.3, 114.7, 112.0, 55.3, 55.3, 21.0.<sup>[20]</sup>

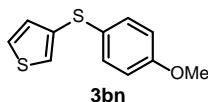

**3bn:** yellow oil;  $^1\text{H}$  NMR (500 MHz,  $\text{CDCl}_3$ )  $\delta$  7.34–7.29 (m, 3H), 7.13 (dd,  $J = 3.0, 1.3$  Hz, 1H), 6.95 (dd,  $J = 5.0, 1.3$  Hz, 1H), 6.85 (d,  $J = 8.9$  Hz, 2H), 3.80 (s, 3H);  $^{13}\text{C}$  NMR (101 MHz,  $\text{CDCl}_3$ )  $\delta$  159.2, 132.8, 132.4, 129.7, 126.4, 126.3, 124.4, 114.8, 55.4.<sup>[10]</sup>

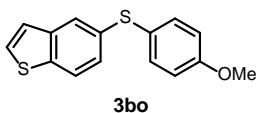

**3bo:** yellow oil;  $^1\text{H}$  NMR (500 MHz,  $\text{CDCl}_3$ )  $\delta$  8.70 (d,  $J = 3.5$  Hz, 2H), 7.93 (d,  $J = 9.1$  Hz, 1H), 7.56–7.49 (m, 4H), 6.97 (d,  $J = 8.9$  Hz, 2H), 3.85 (s, 3H);  $^{13}\text{C}$  NMR (126 MHz,  $\text{CDCl}_3$ )  $\delta$  160.8, 145.2, 143.9, 143.7, 143.4, 141.3, 137.0, 129.5, 129.2, 124.4, 121.2, 115.6, 55.4; HRMS (EI)  $m/z$  calcd. for  $\text{C}_{15}\text{H}_{12}\text{OS}_2$   $[\text{M}]^+$  272.0330 found 272.0333.

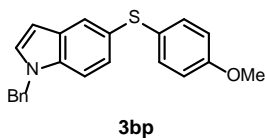

**3bp:** pale yellow oil;  $^1\text{H}$  NMR (500 MHz,  $\text{CDCl}_3$ )  $\delta$  7.70 (s, 1H), 7.34–7.23 (m, 5H), 7.20 (s, 2H), 7.16–7.05 (m, 3H), 6.81 (d,  $J = 8.3$  Hz, 2H), 6.48 (s, 1H), 5.29 (s, 2H), 3.77 (s, 3H);  $^{13}\text{C}$  NMR (101 MHz,  $\text{CDCl}_3$ )  $\delta$  158.6, 137.2, 135.6, 132.1, 129.5, 129.1, 128.8, 128.7, 127.7, 126.8, 125.9, 125.8, 124.9, 114.6, 110.5, 101.7, 55.3, 50.2; HRMS (EI)  $m/z$  calcd. for  $\text{C}_{22}\text{H}_{19}\text{NOS}$   $[\text{M}]^+$  345.1187 found 345.1188

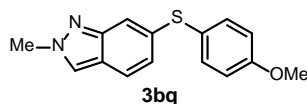

**3bq**: white solid;  $^1\text{H}$  NMR (500 MHz,  $\text{DMSO-}d_6$ )  $\delta$  8.28 (s, 1H), 7.62 (d,  $J = 8.7$  Hz, 1H), 7.39 (d,  $J = 8.5$  Hz, 2H), 7.25 (s, 1H), 6.99 (d,  $J = 8.5$  Hz, 2H), 6.82 (d,  $J = 8.7$  Hz, 1H), 4.09 (s, 3H), 3.77 (s, 3H);  $^{13}\text{C}$  NMR (126 MHz,  $\text{DMSO-}d_6$ )  $\delta$  159.3, 148.2, 146.9, 133.5, 129.6, 126.6, 124.3, 114.8, 111.2, 108.8, 101.3, 55.4, 40.4; HRMS (ESI)  $m/z$  calcd. for  $\text{C}_{15}\text{H}_{14}\text{N}_2\text{OS}$   $[\text{M} + \text{H}]^+$  271.0827 found 271.0933.

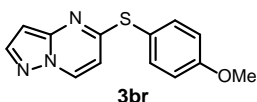

**3br**: white solid;  $^1\text{H}$  NMR (500 MHz,  $\text{CDCl}_3$ )  $\delta$  8.34 (d,  $J = 7.4$  Hz, 1H), 8.00 (d,  $J = 2.2$  Hz, 1H), 7.55 (d,  $J = 8.8$  Hz, 2H), 7.00 (d,  $J = 8.8$  Hz, 2H), 6.44 (d,  $J = 1.8$  Hz, 1H), 6.33 (d,  $J = 7.4$  Hz, 1H), 3.87 (s, 3H);  $^{13}\text{C}$  NMR (126 MHz,  $\text{CDCl}_3$ )  $\delta$  163.2, 161.2, 145.3, 137.4, 134.3, 119.3, 115.4, 105.5, 95.3, 55.5; HRMS (ESI)  $m/z$  calcd. for  $\text{C}_{13}\text{H}_{11}\text{N}_3\text{OS}$   $[\text{M} + \text{H}]^+$  258.0623 found 258.0696.

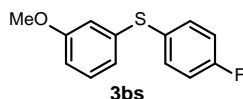

**3bs**: pale yellow oil;  $^1\text{H}$  NMR (400 MHz,  $\text{CDCl}_3$ )  $\delta$  7.41 (dd,  $J = 7.8, 5.4$  Hz, 2H), 7.19 (t,  $J = 8.0$  Hz, 1H), 7.04 (t,  $J = 8.3$  Hz, 2H), 6.83 (d,  $J = 7.8$  Hz, 1H), 6.80–6.72 (m, 2H), 3.75 (s, 3H);  $^{13}\text{C}$  NMR (101 MHz,  $\text{CDCl}_3$ )  $\delta$  162.5 (d,  $J = 248.1$  Hz), 160.1, 138.1, 134.5 (d,  $J = 8.2$  Hz), 129.9, 129.7, 121.9, 116.4 (d,  $J = 22.0$  Hz), 115.0, 112.3, 55.2;  $^{19}\text{F}$  NMR (376 MHz,  $\text{CDCl}_3$ )  $\delta$  -113.7 (ddd,  $J = 13.8, 8.6, 5.2$  Hz).<sup>[9]</sup>

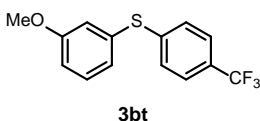

**3bt**: pale yellow oil;  $^1\text{H}$  NMR (500 MHz,  $\text{CDCl}_3$ )  $\delta$  7.49 (d,  $J = 8.2$  Hz, 2H), 7.30 (t,  $J = 7.8$  Hz, 3H), 7.05 (d,  $J = 8.5$  Hz, 1H), 7.01 (s, 1H), 6.91 (d,  $J = 8.3$  Hz, 1H), 3.80 (s, 3H);  $^{13}\text{C}$  NMR (126 MHz,  $\text{CDCl}_3$ )  $\delta$  160.3, 142.5, 133.7, 130.4, 128.5, 128.1 (q,  $J = 32.8$  Hz), 125.8 (q,  $J = 3.8$  Hz), 125.5, 124.1 (q,  $J = 271.8$  Hz), 118.4, 114.4, 55.4;  $^{19}\text{F}$  NMR (376 MHz,  $\text{CDCl}_3$ )  $\delta$  -62.5 (s).<sup>[26]</sup>

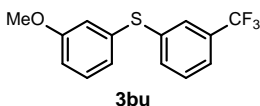

**3bu**: pale yellow oil;  $^1\text{H}$  NMR (400 MHz,  $\text{CDCl}_3$ )  $\delta$  7.56 (s, 1H), 7.45 (t,  $J = 7.6$  Hz, 2H), 7.41–7.34 (m, 1H), 7.27 (t,  $J = 8.0$  Hz, 1H), 6.98 (d,  $J = 8.3$  Hz, 1H), 6.94 (s, 1H), 6.86 (dd,  $J = 8.3, 2.5$  Hz, 1H), 3.78 (s, 3H);  $^{13}\text{C}$  NMR (101 MHz,  $\text{CDCl}_3$ )  $\delta$  160.3, 138.1, 134.8, 133.1 (q,  $J = 1.5$  Hz), 131.5 (q,  $J = 32.4$  Hz), 130.3, 129.5, 126.5 (q,  $J = 3.8$  Hz), 124.4, 123.7 (q,  $J = 272.7$  Hz), 123.4 (q,  $J = 3.8$  Hz), 117.3, 114.0, 55.3;  $^{19}\text{F}$  NMR (376 MHz,  $\text{CDCl}_3$ )  $\delta$  -62.9 (s).<sup>[27]</sup>

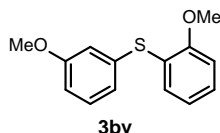

**3bv**: pale yellow oil;  $^1\text{H}$  NMR (500 MHz,  $\text{CDCl}_3$ )  $\delta$  7.25 (t,  $J = 7.3$  Hz, 1H), 7.21 (t,  $J = 8.0$  Hz, 1H), 7.14 (d,  $J = 8.6$  Hz, 1H), 6.91 (dd,  $J = 8.0, 3.6$  Hz, 2H), 6.87 (d,  $J = 7.4$  Hz, 2H), 6.79 (d,  $J = 8.3$  Hz, 1H), 3.87 (s, 3H), 3.76 (s, 3H);  $^{13}\text{C}$  NMR (126 MHz,  $\text{CDCl}_3$ )  $\delta$  160.0, 157.5, 135.9, 132.1, 129.9, 128.6, 127.7, 123.4, 121.3, 116.2, 112.9, 110.9, 55.9, 55.3; HRMS (EI)  $m/z$  calcd. for  $\text{C}_{14}\text{H}_{14}\text{O}_2\text{S}$   $[\text{M}]^+$  246.0715 found 246.0716

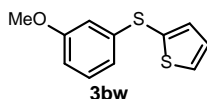

**3bw**: yellow oil;  $^1\text{H}$  NMR (400 MHz,  $\text{CDCl}_3$ )  $\delta$  7.49 (d,  $J = 5.4$  Hz, 1H), 7.31 (d,  $J = 3.6$  Hz, 1H), 7.17 (t,  $J = 8.0$  Hz, 1H), 7.09 (t,  $J = 4.9$  Hz, 1H), 6.78 (d,  $J = 8.5$  Hz, 1H), 6.75–6.68 (m, 2H), 3.75 (s, 3H);  $^{13}\text{C}$  NMR (101 MHz,  $\text{CDCl}_3$ )  $\delta$  160.0, 140.1, 136.3, 131.5, 130.7, 129.8, 127.9, 119.2, 112.5, 111.7, 55.2.<sup>[28]</sup>

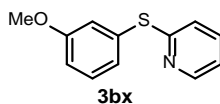

**3bx**: yellow oil;  $^1\text{H}$  NMR (400 MHz,  $\text{CDCl}_3$ )  $\delta$  8.43 (d,  $J = 4.4$  Hz, 1H), 7.46 (t,  $J = 8.5$  Hz, 1H), 7.33 (t,  $J = 8.0$  Hz, 1H), 7.18 (d,  $J = 8.2$  Hz, 1H), 7.14 (s, 1H), 7.03–6.97 (m, 1H), 6.94 (t,  $J = 8.4$  Hz, 2H), 3.81 (s, 3H);  $^{13}\text{C}$  NMR (101 MHz,  $\text{CDCl}_3$ )  $\delta$  161.4, 160.3, 149.5, 136.8, 132.1, 130.4, 127.0, 121.6, 119.9, 119.7, 115.2, 55.4.<sup>[29]</sup>

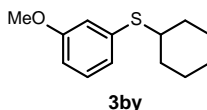

**3bz**: pale yellow oil;  $^1\text{H}$  NMR (400 MHz,  $\text{CDCl}_3$ )  $\delta$  7.19 (t,  $J = 8.0$  Hz, 1H), 7.00–6.91 (m, 2H), 6.75 (dd,  $J = 8.3, 2.5$  Hz, 1H), 3.80 (s, 3H), 3.13 (t,  $J = 10.2$  Hz, 1H), 2.00 (d,  $J = 11.1$  Hz, 2H), 1.77 (d,  $J = 9.0$  Hz, 2H), 1.61 (d,  $J = 10.6$  Hz, 1H), 1.33 (dp,  $J = 27.7, 9.8, 9.1$  Hz, 4H);  $^{13}\text{C}$  NMR (101 MHz,  $\text{CDCl}_3$ )  $\delta$  159.7, 136.6, 129.5, 123.7, 116.9, 112.2, 55.2, 46.4, 33.3, 26.0, 25.8; HRMS (ESI)  $m/z$  calcd. for  $\text{C}_{13}\text{H}_{18}\text{OS}$  [ $\text{M} + \text{H}$ ] $^+$  223.1078 found 223.1151.

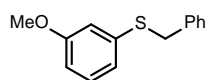

**3bz**

**3bz**: yellow oil;  $^1\text{H}$  NMR (400 MHz,  $\text{CDCl}_3$ )  $\delta$  7.29 (dt,  $J = 22.2, 6.5$  Hz, 5H), 7.18 (t,  $J = 8.0$  Hz, 1H), 6.92 (d,  $J = 8.5$  Hz, 1H), 6.84 (s, 1H), 6.74 (dd,  $J = 9.0, 1.6$  Hz, 1H), 4.14 (s, 2H), 3.74 (s, 3H);  $^{13}\text{C}$  NMR (101 MHz,  $\text{CDCl}_3$ )  $\delta$  159.7, 137.8, 137.4, 129.7, 128.9, 128.5, 127.2, 121.7, 114.8, 112.2, 55.2, 38.8; HRMS (ESI)  $m/z$  calcd. for  $\text{C}_{14}\text{H}_{14}\text{OS}$  [ $\text{M} + \text{H}$ ] $^+$  231.0765 found 231.0838.

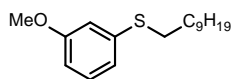

**3ca**

**3ca**: yellow oil;  $^1\text{H}$  NMR (500 MHz,  $\text{CDCl}_3$ )  $\delta$  7.19 (t,  $J = 8.0$  Hz, 1H), 6.90 (d,  $J = 7.8$  Hz, 1H), 6.87–6.85 (m, 1H), 6.70 (dd,  $J = 8.2, 3.2$  Hz, 1H), 3.80 (s, 3H), 2.94–2.89 (m, 2H), 1.66 (p,  $J = 7.4$  Hz, 2H), 1.42 (p,  $J = 7.3$  Hz, 2H), 1.26 (s, 12H), 0.88 (t,  $J = 7.0$  Hz, 3H);  $^{13}\text{C}$  NMR (101 MHz,  $\text{CDCl}_3$ )  $\delta$  159.8, 138.5, 129.6, 120.8, 114.0, 111.2, 55.2, 33.3, 31.9, 29.53, 29.50, 29.3, 29.2, 29.1, 28.9, 22.7, 14.1; HRMS (EI)  $m/z$  calcd. for  $\text{C}_{17}\text{H}_{28}\text{OS}$  [ $\text{M}$ ] $^+$  280.1861 found 280.1863.

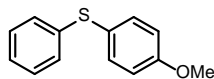

**3cb**

**3cb**: pale yellow oil;  $^1\text{H}$  NMR (500 MHz,  $\text{CDCl}_3$ )  $\delta$  7.41 (d,  $J = 8.9$  Hz, 2H), 7.25–7.20 (m, 2H), 7.16 (d,  $J = 7.2$  Hz, 2H), 7.13 (t,  $J = 7.2$  Hz, 1H), 6.89 (d,  $J = 8.9$  Hz, 2H), 3.81 (s, 3H);  $^{13}\text{C}$  NMR (126 MHz,  $\text{CDCl}_3$ )  $\delta$  159.8, 138.6, 135.4, 128.9, 128.2, 125.8, 124.3, 115.0, 55.4.<sup>[30]</sup>

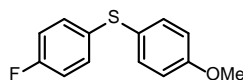

**3cd**

**3cd**: pale yellow oil;  $^1\text{H}$  NMR (500 MHz,  $\text{CDCl}_3$ )  $\delta$  7.37 (d,  $J = 8.9$  Hz, 2H), 7.20 (dd,  $J = 8.9, 5.2$  Hz, 2H), 6.96 (t,  $J = 8.7$  Hz, 2H), 6.89 (d,  $J = 8.8$  Hz, 2H), 3.82 (s, 3H);  $^{13}\text{C}$  NMR (126 MHz,  $\text{CDCl}_3$ )  $\delta$  161.9 (d,  $J = 246.0$  Hz), 159.7, 134.5, 133.1 (d,  $J = 3.3$  Hz), 131.0 (d,  $J = 7.9$  Hz), 125.2, 116.1 (d,  $J = 21.9$  Hz), 115.0, 55.4;  $^{19}\text{F}$  NMR (376 MHz,  $\text{CDCl}_3$ )  $\delta$  -116.07–116.2 (m).<sup>[21]</sup>

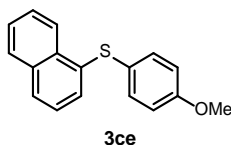

**3ce**: pale yellow oil;  $^1\text{H}$  NMR (500 MHz,  $\text{CDCl}_3$ )  $\delta$  8.37 (d,  $J = 7.8$  Hz, 1H), 7.85 (d,  $J = 9.0$  Hz, 1H), 7.73 (d,  $J = 7.5$  Hz, 1H), 7.52 (p,  $J = 6.6, 6.1$  Hz, 2H), 7.34 (d,  $J = 11.3$  Hz, 4H), 6.87 (d,  $J = 8.7$  Hz, 2H), 3.80 (s, 3H);  $^{13}\text{C}$  NMR (126 MHz,  $\text{CDCl}_3$ )  $\delta$  159.4, 134.6, 134.0, 133.9, 132.2, 128.50, 128.45, 127.4, 126.5, 126.3, 125.7, 125.1, 124.9, 115.0, 55.4.<sup>[9]</sup>

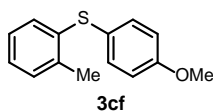

**3cf**: pale yellow oil;  $^1\text{H}$  NMR (500 MHz,  $\text{CDCl}_3$ )  $\delta$  7.33 (d,  $J = 8.8$  Hz, 2H), 7.17 (d,  $J = 7.1$  Hz, 1H), 7.09 (t,  $J = 6.6$  Hz, 1H), 7.05 (t,  $J = 7.3$  Hz, 1H), 6.96 (d,  $J = 8.8$  Hz, 1H), 6.89 (d,  $J = 8.8$  Hz, 2H), 3.82 (s, 3H), 2.38 (s, 3H);  $^{13}\text{C}$  NMR (126 MHz,  $\text{CDCl}_3$ )  $\delta$  159.5, 137.1, 136.9, 134.7, 130.2, 128.9, 126.5, 126.1, 124.3, 115.0, 55.4, 20.3.<sup>[21]</sup>

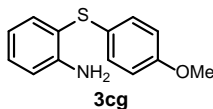

**3cg**: brown oil;  $^1\text{H}$  NMR (500 MHz,  $\text{CDCl}_3$ )  $\delta$  7.41 (d,  $J = 7.7$  Hz, 1H), 7.22–7.15 (m, 1H), 7.13 (d,  $J = 8.9$  Hz, 2H), 6.81 (d,  $J = 8.9$  Hz, 2H), 6.79–6.70 (m, 2H), 4.27 (s, 2H), 3.76 (s, 3H);  $^{13}\text{C}$  NMR (126 MHz,  $\text{CDCl}_3$ )  $\delta$  158.3, 148.1, 136.4, 130.4, 129.6, 126.8, 118.7, 116.7, 115.4, 114.8, 55.4.<sup>[31]</sup>

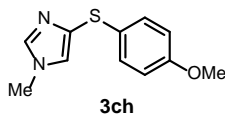



**3ch**: brown oil;  $^1\text{H}$  NMR (500 MHz,  $\text{CDCl}_3$ )  $\delta$  7.44 (s, 1H), 7.31 (d,  $J = 8.9$  Hz, 2H), 7.00 (s, 1H), 6.79 (d,  $J = 8.9$  Hz, 2H), 3.75 (s, 3H), 3.65 (s, 3H);  $^{13}\text{C}$  NMR (126 MHz,  $\text{CDCl}_3$ )  $\delta$  158.6, 138.8, 133.5, 131.4, 127.6, 123.8, 114.5, 55.3, 33.6; HRMS (ESI)  $m/z$  calcd. for  $\text{C}_{11}\text{H}_{12}\text{N}_2\text{OS}$  [ $\text{M} + \text{H}$ ] $^+$  221.0670 found 221.0746.

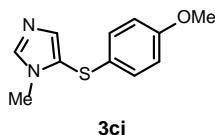

**3ci**: brown oil;  $^1\text{H}$  NMR (500 MHz,  $\text{CDCl}_3$ )  $\delta$  7.69 (s, 1H), 7.40 (s, 1H), 7.09 (d,  $J = 8.9$  Hz, 2H), 6.80 (d,  $J = 8.9$  Hz, 2H), 3.76 (s, 3H), 3.54 (s, 3H);  $^{13}\text{C}$  NMR (101 MHz,  $\text{CDCl}_3$ )  $\delta$  158.7, 137.3, 132.7, 131.7, 129.6, 126.2, 114.9, 55.4, 31.7; HRMS (ESI)  $m/z$  calcd. for  $\text{C}_{11}\text{H}_{12}\text{N}_2\text{OS}$  [ $\text{M} + \text{H}$ ] $^+$  221.0670 found 221.0746.

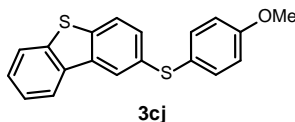

**3cj**: yellow solid;  $^1\text{H}$  NMR (500 MHz,  $\text{CDCl}_3$ )  $\delta$  8.04 (d,  $J = 5.5$  Hz, 2H), 7.83 (d,  $J = 9.6$  Hz, 1H), 7.73 (d,  $J = 8.4$  Hz, 1H), 7.49–7.40 (m, 4H), 7.34 (dd,  $J = 8.4$ , 1.8 Hz, 1H), 6.91 (d,  $J = 8.9$  Hz, 2H), 3.83 (s, 3H);  $^{13}\text{C}$  NMR (126 MHz,  $\text{CDCl}_3$ )  $\delta$  159.6, 139.9, 137.7, 136.3, 134.8, 134.3, 134.0, 128.4, 127.0, 125.5, 124.5, 123.3, 122.9, 122.6, 121.7, 115.1, 55.4; HRMS (EI)  $m/z$  calcd. for  $\text{C}_{19}\text{H}_{14}\text{OS}_2$  [ $\text{M}$ ] $^+$  322.0486 found 322.0488.

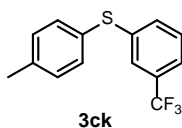

**3ck**: pale yellow oil;  $^1\text{H}$  NMR (500 MHz,  $\text{CDCl}_3$ )  $\delta$  7.46 (s, 1H), 7.40 (d,  $J = 6.4$  Hz, 1H), 7.35 (dd,  $J = 11.4$ , 7.2 Hz, 4H), 7.20 (d,  $J = 8.1$  Hz, 2H), 2.38 (s, 3H);  $^{13}\text{C}$  NMR (126 MHz,  $\text{CDCl}_3$ )  $\delta$  139.7, 138.8, 133.5, 131.6 (q,  $J = 1.5$  Hz), 131.3 (q,  $J = 32.4$  Hz), 130.5, 129.3, 129.1, 125.0 (q,  $J = 3.9$  Hz), 123.8 (q,  $J = 272.6$  Hz), 122.6 (q,  $J = 3.8$  Hz), 21.2;  $^{19}\text{F}$  NMR (376 MHz,  $\text{CDCl}_3$ )  $\delta$  -62.8 (s).<sup>[32]</sup>

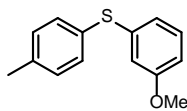

**3cl**

**3cl:** pale yellow oil;  $^1\text{H}$  NMR (500 MHz,  $\text{CDCl}_3$ )  $\delta$  7.33 (d,  $J = 8.1$  Hz, 2H), 7.20–7.12 (m, 3H), 6.84 (d,  $J = 7.7$  Hz, 1H), 6.81–6.78 (m, 1H), 6.73 (dd,  $J = 8.6, 2.8$  Hz, 1H), 3.75 (s, 3H), 2.36 (s, 3H);  $^{13}\text{C}$  NMR (126 MHz,  $\text{CDCl}_3$ )  $\delta$  160.0, 138.6, 137.8, 132.6, 130.7, 130.1, 129.8, 121.7, 114.8, 112.0, 55.3, 21.2.<sup>[33]</sup>

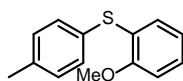

**3cm**

**3cm:** pale yellow oil;  $^1\text{H}$  NMR (500 MHz,  $\text{CDCl}_3$ )  $\delta$  7.32 (d,  $J = 7.9$  Hz, 2H), 7.17 (t,  $J = 7.3$  Hz, 3H), 6.93 (d,  $J = 7.7$  Hz, 1H), 6.88 (d,  $J = 8.2$  Hz, 1H), 6.83 (t,  $J = 7.5$  Hz, 1H), 3.90 (s, 3H), 2.36 (s, 3H);  $^{13}\text{C}$  NMR (126 MHz,  $\text{CDCl}_3$ )  $\delta$  156.5, 137.7, 133.0, 130.1, 129.9, 129.8, 127.4, 125.7, 121.2, 110.6, 55.9, 21.2; HRMS (ESI)  $m/z$  calcd. for  $\text{C}_{17}\text{H}_{17}\text{NS}_2$  [ $\text{M} + \text{H}$ ] $^+$  300.0802 found 300.0875.

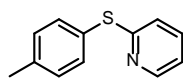

**3cn**

**3cn:** pale yellow oil;  $^1\text{H}$  NMR (500 MHz,  $\text{CDCl}_3$ )  $\delta$  8.41 (d,  $J = 7.3$  Hz, 1H), 7.49 (d,  $J = 8.1$  Hz, 2H), 7.46–7.39 (m, 1H), 7.24 (d,  $J = 7.8$  Hz, 2H), 7.00–6.94 (m, 1H), 6.83 (d,  $J = 8.1$  Hz, 1H), 2.40 (s, 3H);  $^{13}\text{C}$  NMR (126 MHz,  $\text{CDCl}_3$ )  $\delta$  162.2, 149.5, 139.5, 136.6, 135.3, 130.5, 127.2, 120.8, 119.6, 21.3.<sup>[34]</sup>

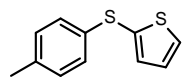

**3co**

**3co:** yellow oil;  $^1\text{H}$  NMR (500 MHz,  $\text{CDCl}_3$ )  $\delta$  7.44 (dd,  $J = 5.4, 1.3$  Hz, 1H), 7.28 (dd,  $J = 3.5, 1.1$  Hz, 1H), 7.16 (d,  $J = 8.2$  Hz, 2H), 7.09 (d,  $J = 8.1$  Hz, 2H), 7.06 (dd,  $J = 5.4, 3.6$  Hz, 1H), 2.31 (s, 3H);  $^{13}\text{C}$  NMR (126 MHz,  $\text{CDCl}_3$ )  $\delta$  136.3, 135.3, 134.8, 132.4, 130.8, 129.8, 128.0, 127.8, 21.0.<sup>[14]</sup>

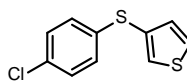

**3cp**

**3cp**: yellow oil;  $^1\text{H}$  NMR (500 MHz,  $\text{CDCl}_3$ )  $\delta$  7.43–7.37 (m, 2H), 7.22 (d,  $J$  = 8.5 Hz, 2H), 7.13 (d,  $J$  = 8.5 Hz, 2H), 7.04 (dd,  $J$  = 4.9, 1.1 Hz, 1H);  $^{13}\text{C}$  NMR (101 MHz,  $\text{CDCl}_3$ )  $\delta$  136.1, 132.0, 131.2, 129.5, 129.3, 129.1, 128.8, 127.1.<sup>[35]</sup>

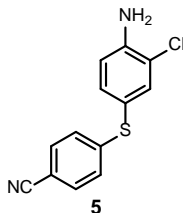

**5**: white solid;  $^1\text{H}$  NMR (500 MHz,  $\text{CDCl}_3$ )  $\delta$  7.47–7.43 (m, 3H), 7.23 (dd,  $J$  = 8.3, 2.0 Hz, 1H), 7.07 (d,  $J$  = 8.7 Hz, 2H), 6.81 (d,  $J$  = 8.3 Hz, 1H), 4.35 (s, 2H);  $^{13}\text{C}$  NMR (126 MHz,  $\text{CDCl}_3$ )  $\delta$  147.3, 144.6, 136.5, 135.4, 132.3, 125.9, 119.6, 118.9, 117.5, 116.5, 108.1.<sup>[36]</sup>

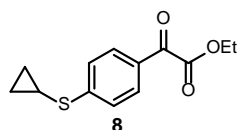

**8**: yellow oil;  $^1\text{H}$  NMR (500 MHz,  $\text{CDCl}_3$ )  $\delta$  7.92 (d,  $J$  = 8.4 Hz, 2H), 7.44 (d,  $J$  = 8.5 Hz, 2H), 4.44 (q,  $J$  = 7.2 Hz, 2H), 2.20 (ddd,  $J$  = 11.7, 7.4, 4.4 Hz, 1H), 1.42 (t,  $J$  = 7.2 Hz, 3H), 1.20–1.14 (m, 2H), 0.73 (q,  $J$  = 5.6, 4.8 Hz, 2H);  $^{13}\text{C}$  NMR (126 MHz,  $\text{CDCl}_3$ )  $\delta$  185.4, 163.9, 149.8, 130.3, 128.7, 125.2, 62.3, 14.1, 11.0, 8.6.<sup>[37]</sup>

### Condition screening for Cu-catalyzed arylation of thiol

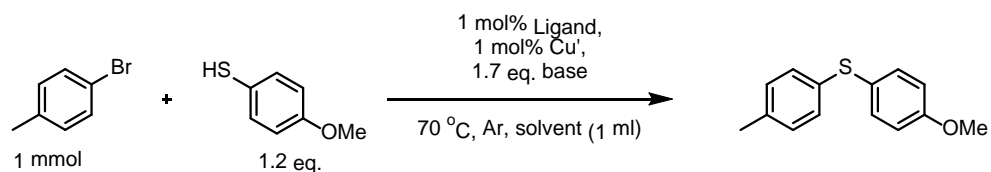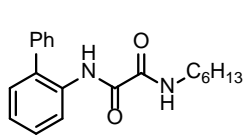

**L1**

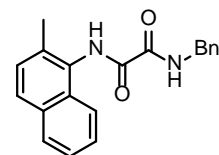

**L2**

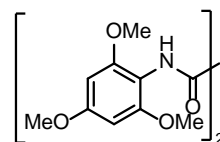

**L3**

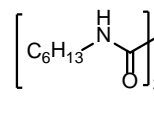

**L4 (DBO)**

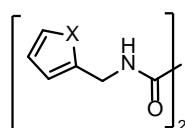

**L5 (BTMO): X = S**  
**L6 (BMFO): X = O**

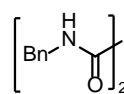

**L7**

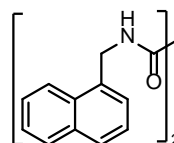

**L8 (BNMO)**

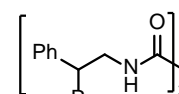

**L9 (DPEO): R = H**  
**L10 (BPPRO): R = Me**

| Entry | Catalyst          | Ligand    | Base                           | Solvent | NMR Yield |
|-------|-------------------|-----------|--------------------------------|---------|-----------|
| 1     | CuI               | <b>L1</b> | t-BuOK                         | Dioxane | 36%       |
| 2     | CuI               | <b>L2</b> | t-BuOK                         | Dioxane | 80%       |
| 3     | CuI               | <b>L3</b> | t-BuOK                         | Dioxane | 22%       |
| 4     | CuI               | <b>L4</b> | t-BuOK                         | Dioxane | 58%       |
| 5     | CuI               | <b>L5</b> | t-BuOK                         | Dioxane | 60%       |
| 6     | CuI               | <b>L6</b> | t-BuOK                         | Dioxane | 49%       |
| 7     | CuI               | <b>L7</b> | t-BuOK                         | Dioxane | 72%       |
| 8     | CuI               | <b>L2</b> | t-BuONa                        | Dioxane | 21%       |
| 9     | CuI               | <b>L2</b> | K <sub>2</sub> CO <sub>3</sub> | Dioxane | NR        |
| 10    | CuI               | <b>L2</b> | KOH                            | Dioxane | 18%       |
| 11    | CuI               | <b>L2</b> | K <sub>3</sub> PO <sub>4</sub> | Dioxane | NR        |
| 12    | CuI               | <b>L2</b> | t-BuOLi                        | Dioxane | 15%       |
| 13    | CuI               | <b>L2</b> | t-BuOK                         | DMSO    | 32%       |
| 14    | CuI               | <b>L2</b> | t-BuOK                         | DME     | 46%       |
| 15    | CuI               | <b>L2</b> | t-BuOK                         | THF     | 43%       |
| 16    | CuI               | <b>L2</b> | t-BuOK                         | DMF     | NR        |
| 17    | CuI               | <b>L8</b> | t-BuOK                         | Dioxane | 86%       |
| 18    | CuCl              | <b>L8</b> | t-BuOK                         | Dioxane | 83%       |
| 19    | CuBr              | <b>L8</b> | t-BuOK                         | Dioxane | 85%       |
| 20    | Cu <sub>2</sub> O | <b>L8</b> | t-BuOK                         | Dioxane | 94%       |

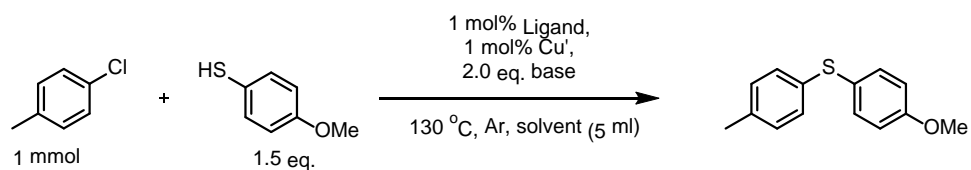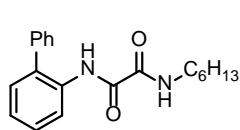

**L1**

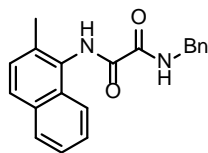

**L2**

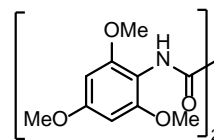

**L3**

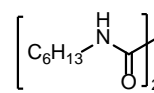

**L4 (DBO)**

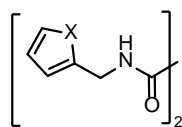

**L5 (BTMO): X = S**  
**L6 (BMFO): X = O**

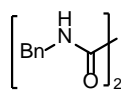

**L7**

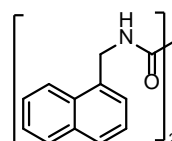

**L8 (BNMO)**

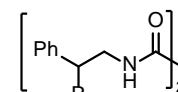

**L9 (DPEO): R = H**  
**L10 (BPPRO): R = Me**

| Entry | Catalyst          | Ligand     | Base                           | Solvent (1 ml)           | NMR Yield |
|-------|-------------------|------------|--------------------------------|--------------------------|-----------|
| 1     | CuI               | <b>L1</b>  | t-BuOK                         | Dioxane                  | 15%       |
| 2     | CuI               | <b>L2</b>  | t-BuOK                         | Dioxane                  | 27%       |
| 3     | CuI               | <b>L3</b>  | t-BuOK                         | Dioxane                  | 30%       |
| 4     | CuI               | <b>L4</b>  | t-BuOK                         | Dioxane                  | 38%       |
| 5     | CuI               | <b>L8</b>  | t-BuOK                         | Dioxane                  | 45%       |
| 6     | CuI               | <b>L9</b>  | t-BuOK                         | Dioxane                  | 51%       |
| 7     | CuI               | <b>L10</b> | t-BuOK                         | Dioxane                  | 57%       |
| 8     | CuI               | <b>L10</b> | K <sub>2</sub> CO <sub>3</sub> | Dioxane                  | NR        |
| 9     | CuI               | <b>L10</b> | KOH                            | Dioxane                  | trace     |
| 10    | CuI               | <b>L10</b> | K <sub>3</sub> PO <sub>4</sub> | Dioxane                  | NR        |
| 11    | CuI               | <b>L10</b> | t-BuONa                        | Dioxane                  | 13%       |
| 12    | Cu <sub>2</sub> O | <b>L10</b> | t-BuOK                         | Dioxane                  | 52%       |
| 13    | CuCl              | <b>L10</b> | t-BuOK                         | Dioxane                  | 62%       |
| 14    | CuCl              | <b>L10</b> | t-BuOK                         | Toluene                  | 20%       |
| 15    | CuCl              | <b>L10</b> | t-BuOK                         | DME                      | 50%       |
| 16    | CuCl              | <b>L10</b> | t-BuOK                         | THF                      | 50%       |
| 17    | CuCl              | <b>L10</b> | t-BuOK                         | 2-MeTHF                  | 37%       |
| 18    | CuCl              | <b>L10</b> | t-BuOK                         | Cyclopentyl methyl ether | 25%       |
| 19    | CuCl              | <b>L10</b> | t-BuOK                         | Dioxane (3 ml)           | 76%       |
| 20    | CuCl              | <b>L10</b> | t-BuOK                         | Dioxane (5 ml)           | 90%       |

#### 4. References

- [1] Chen, Zhixiang; Jiang, Yongwen; Zhang, Li; Guo, Yinlong; Ma, Dawei, *Journal of the American Chemical Society*, **2019**, *141*, 354-3549
- [2] Xu, Yuenian; Liu, Yong; Zhang, Yan; Yang, Kefang; Wang, Yan; Peng, Jiajian; Shao, Xinxin; Bai, Ying, *Journal of Organic Chemistry*, **2023**, *88*, 2773-2783
- [3] Dutta, Soumya; Saha, Amit, *Organic and Biomolecular Chemistry*, **2019**, *17*, 9360-9366
- [4] Wang, Rongkang; Chen, Fangming; Jiang, Lvqi; Yi, Wenbin, *Advanced Synthesis and Catalysis*, **2021**, *363*, 1904-1911
- [5] Zhu, Yuan-Yuan; Lan, Guangxu; Fan, Yingjie; Veroneau, Samuel S.; Song, Yang; Micheroni, Daniel; Lin, Wenbin, *Angewandte Chemie - International Edition*, **2018**, *57*, 14090-14094; *Angew. Chem.*, **2018**, *130*, 14286-14290
- [6] Jiang, Min; Li, Haifang; Yang, Haijun; Fu, Hua, *Angewandte Chemie - International Edition*, **2017**, *56*, 874-879; *Angew. Chem.*, **2017**, *129*, 892-897
- [7] Swan, Charlie; Maggi, Lorenzo; Park, Mahri; Taylor, Sophie; Shepherd, William; Ball, Liam T., *Synthesis*, **2022**, *54*, 3399-3408
- [8] Arisawa, Mieko; Suzuki, Takaaki; Ishikawa, Tomofumi; Yamaguchi, Masahiko, *Journal of the American Chemical Society*, **2008**, *130*, 12214-12215
- [9] Qiao, Zongjun; Ge, Nanyang; Jiang, Xuefeng, *Chemical Communications*, **2015**, *51*, 10295-10298
- [10] Zhou, Jing-Ya; Zhu, Yong-Ming, *European Journal of Organic Chemistry*, **2021**, *2021*, 2452-2461
- [11] Manna, Sudipta Kumar; Manda, Srinivas Lavanya Kumar; Panda, Gautam, *Tetrahedron Letters*, **2014**, *55*, 5759-5763
- [12] Li, Minghao; Hoover, Jessica M., *Chemical Communications*, **2016**, *52*, 8733-8736
- [13] Graßl, Simon; Hamze, Clémence; Koller, Thaddäus J.; Knochel, Paul, *Chemistry - A European Journal*, **2019**, *25*, 3752-3755

- [14] Deng, Guo-Jun; Huang, Huawen; Mao, Guojiang; Zhao, Feng; Zhong, Shuai; Zhou, Zhiwei, *Organic Letters*, **2022**, *24*, 1865-1870
- [15] Yao, Fang; Zhang, Rongli; Wu, Yichao; Cai, Mingzhong, *Journal of Chemical Research*, **2015**, *39*, 612-616
- [16] Wu, Jiang-Ping; Saha, Anjan K.; Haddad, Nizar; Busacca, Carl A.; Lorenz, Jon C.; Lee, Heewon; Senanayake, Chris H., *Advanced Synthesis and Catalysis*, **2016**, *358*, 1924-1928
- [17] Delcaillau, Tristan; Bismuto, Alessandro; Lian, Zhong; Morandi, Bill, *Angewandte Chemie - International Edition*, **2020**, *59*, 2110-2114; *Angew. Chem.* **2020**, *132*, 2126-2131
- [18] Lai, Chih-Shin; Kao, Hsin-Lun; Wang, Yan-Jhang; Lee, Chin-Fa, *Tetrahedron Letters*, **2012**, *53*, 4365-4367
- [19] Jang, Yujin; Kim, Kyoung Tae; Jeon, Heung Bae, *Journal of Organic Chemistry*, **2013**, *78*, 6328-6331
- [20] Chen, Bin; Lei, Tao; Li, Xu-Bing; Nan, Xiao-Lei; Tung, Chen-Ho; Wang, Jing-Hao; Wu, Hao-Lin; Wu, Li-Zhu, *Organic Letters*, **2020**, *22*, 3804-3809
- [21] Wang, Ting-Ting; Yang, Fu-Lai; Tian, Shi-Kai, *Advanced Synthesis and Catalysis*, **2015**, *357*, 928-932
- [22] Chen, Bin; Chen, Ya-Jing; Cheng, Yuan-Yuan; Lei, Tao; Liang, Ge; Tung, Chen-Ho; Wang, Jing-Hao; Wu, Li-Zhu; Ye, Chen; Zhou, Chao, *Organic Letters*, **2021**, *23*, 8082-8087
- [23] Katla, Ramesh; Katla, Rakhi, *New Journal of Chemistry*, **2022**, *46*, 13918-13923
- [24] Fernandez-Rodriguez, Manuel A.; Hartwig, John F., *Journal of Organic Chemistry*, **2009**, *74*, 1664-1672
- [25] Wang, Changliu; Zhang, Zhenming; Tu, Yongliang; Li, Ying; Wu, Jiale; Zhao, Junfeng, *Journal of Organic Chemistry*, **2018**, *83*, 2389-2394.
- [26] EAST CHINA NORMAL UNIVERSITY - CN107857717, **2018**, A, Paragraph 0228

[27] EAST CHINA NORMAL UNIVERSITY - CN107857717, **2018**, A, Paragraph 0240

[28] Reeves, Jonathan T.; Camara, Kaddy; Han, Zhengxu S.; Xu, Yibo; Lee, Heewon; Busacca, Carl A.; Senanayake, Chris H, *Organic Letters*, **2014**, *16*, 1196-1199.

[29] Platon, Mélanie; Wijaya, Novi; Rampazzi, Vincent; Cui, Luchao; Rousselin, Yoann; Saeys, Mark; Hierso, Jean-Cyrille, *Chemistry - A European Journal*, **2014**, *20*, 12584-12594.

[30] Reddy, Vutukuri Prakash; Kumar, Akkilagunta Vijay; Swapna, Kokkerala; Rao, Kakulapati Rama, *Organic Letters*, **2009**, *11*, 1697-1700.

[31] Matsuzawa, Tsubasa; Hosoya, Takamitsu; Yoshida, Suguru, *Organic Letters*, **2021**, *23*, 2347-2352.

[32] Liu, Xing; Cao, Qiang; Xu, Wan; Zeng, Meng-Tian; Dong, Zhi-Bing, *European Journal of Organic Chemistry*, **2017**, *2017*, 5795-5799.

[33] Qiao, Zongjun; Jiang, Xuefeng, *Organic Letters*, **2016**, *18*, 1550-1553.

[34] Pan, Lei; Cooke, Maria Victoria; Spencer, Amara; Laulhé, Sébastien, *Advanced Synthesis and Catalysis*, **2022**, *364*, 420-425.

[35] Lam, Long Yin; Ma, Cong, *Organic Letters*, **2021**, *23*, 6164-6168.

[36] Patel, Bharti; Firkin, Catherine R.; Snape, Evan W.; Jenkin, Shelley L.; Brown, David; Chaffey, Julian G. K.; Hopes, Philip A.; Reens, Carl D.; Butters, Mike; Moseley, Jonathan D, *Organic Process Research and Development*. **2012**, *16*, 447-460.

[37] Magnus, Nicholas A.; Braden, Timothy M.; Buser, Jonas Y.; Debaille, Amy C.; Heath, Perry C.; Ley, Christopher P.; Remacle, Jacob R.; Varie, David L.; Wilson, Thomas M.; *Organic Process Research and Development*, **2012**, *16*, 830-835.



## 5. Copies of $^1\text{H}$ and $^{13}\text{C}$ spectrum of ligands and (hetero)aryl thioethers.

$^1\text{H}$  NMR Spectrum of **L1** (500 MHz,  $\text{DMSO-}d_6$ )

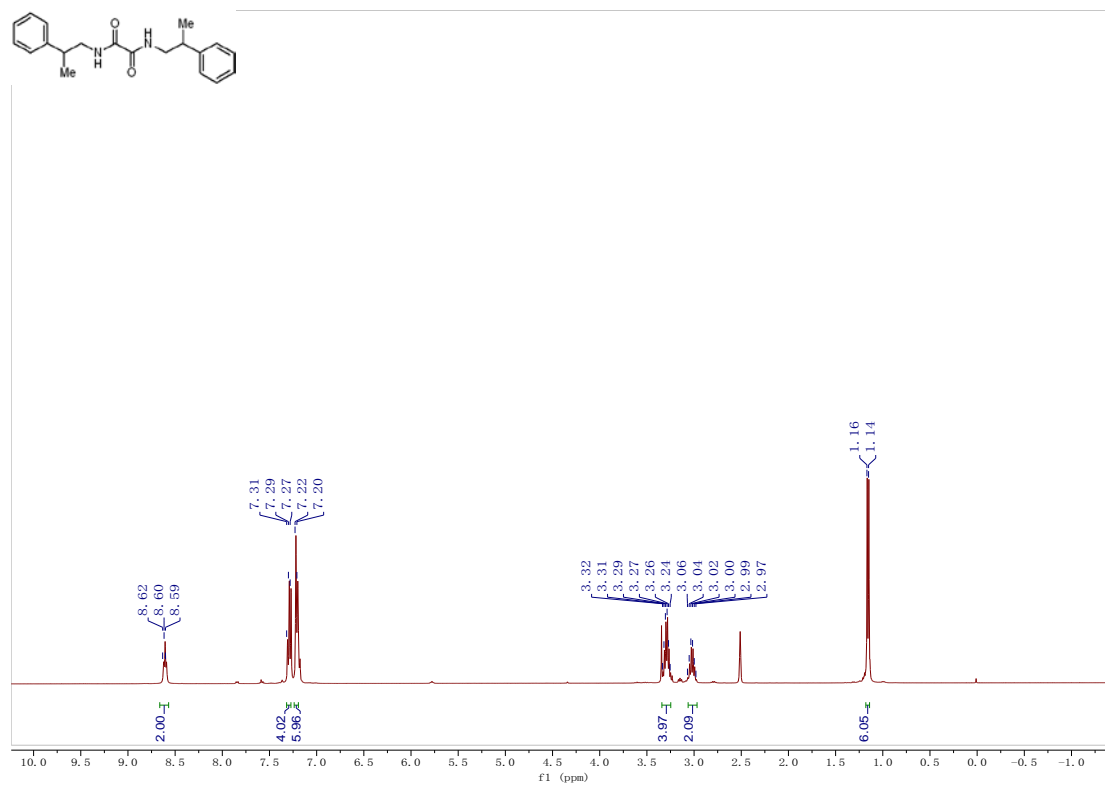

$^{13}\text{C}$  NMR Spectrum of **L1** (126 MHz,  $\text{DMSO-}d_6$ )

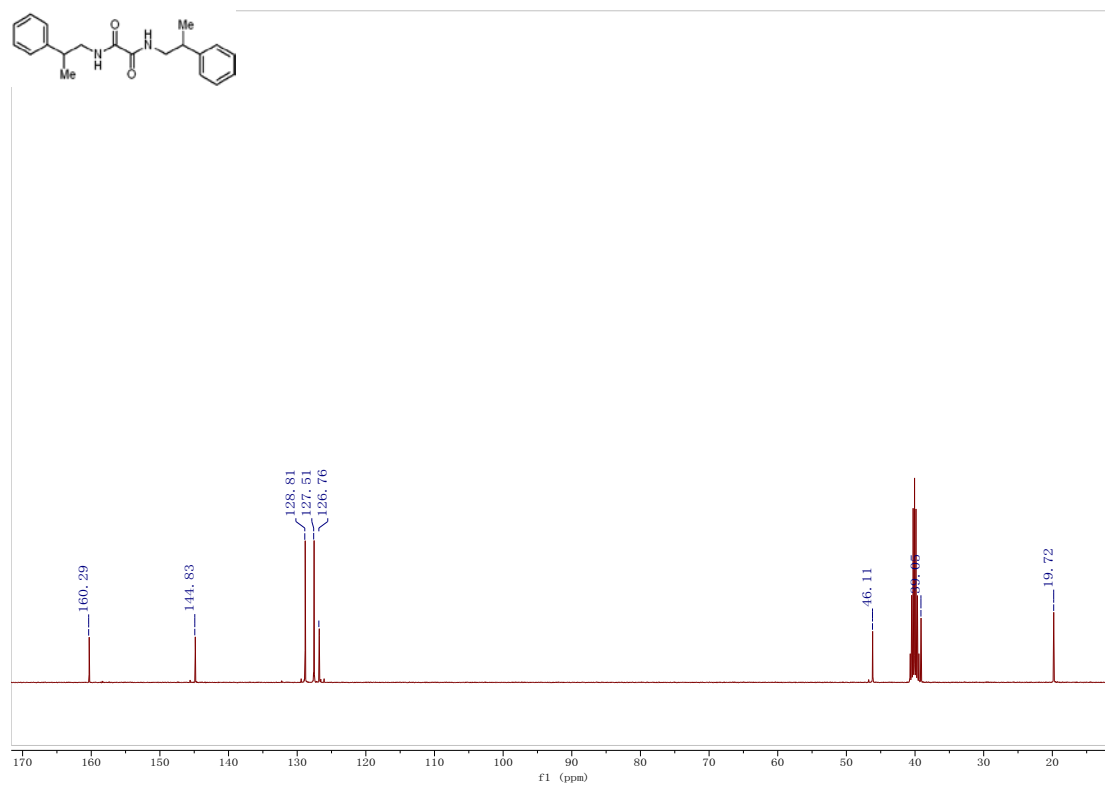

# <sup>1</sup>H NMR Spectrum of L2 (500 MHz, DMSO-d<sub>6</sub>)

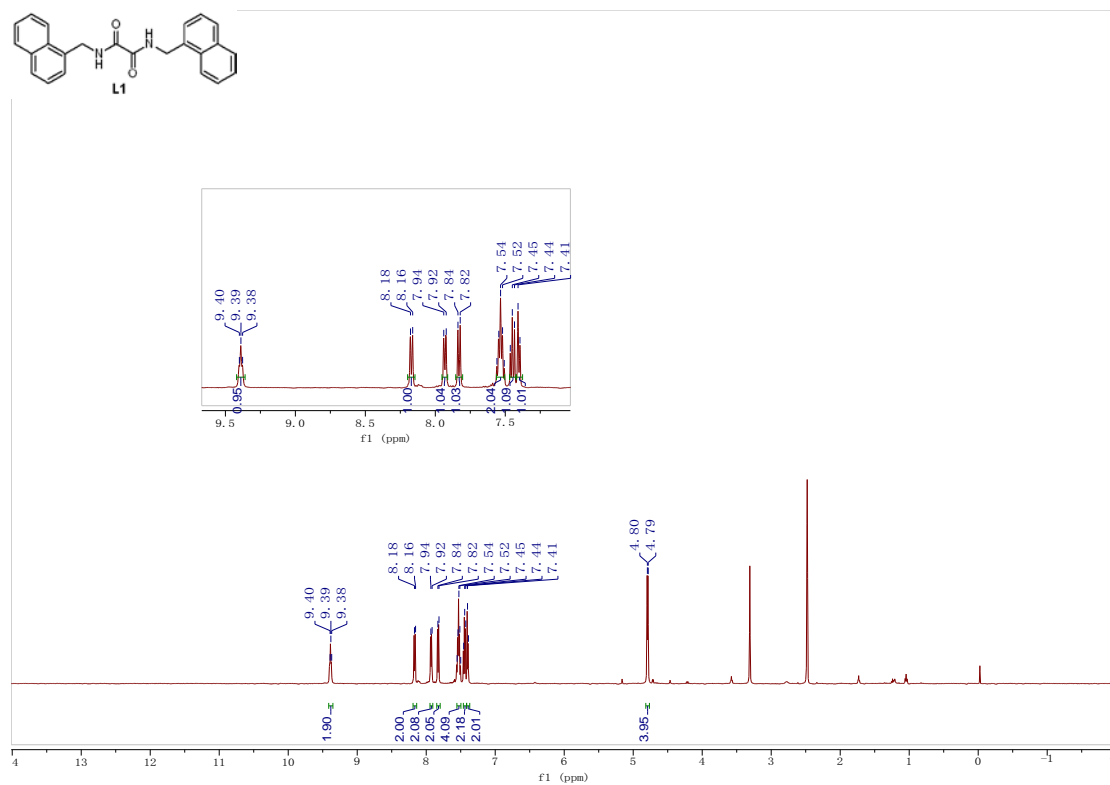

# <sup>13</sup>C NMR Spectrum of L2 (126 MHz, DMSO-d<sub>6</sub>)

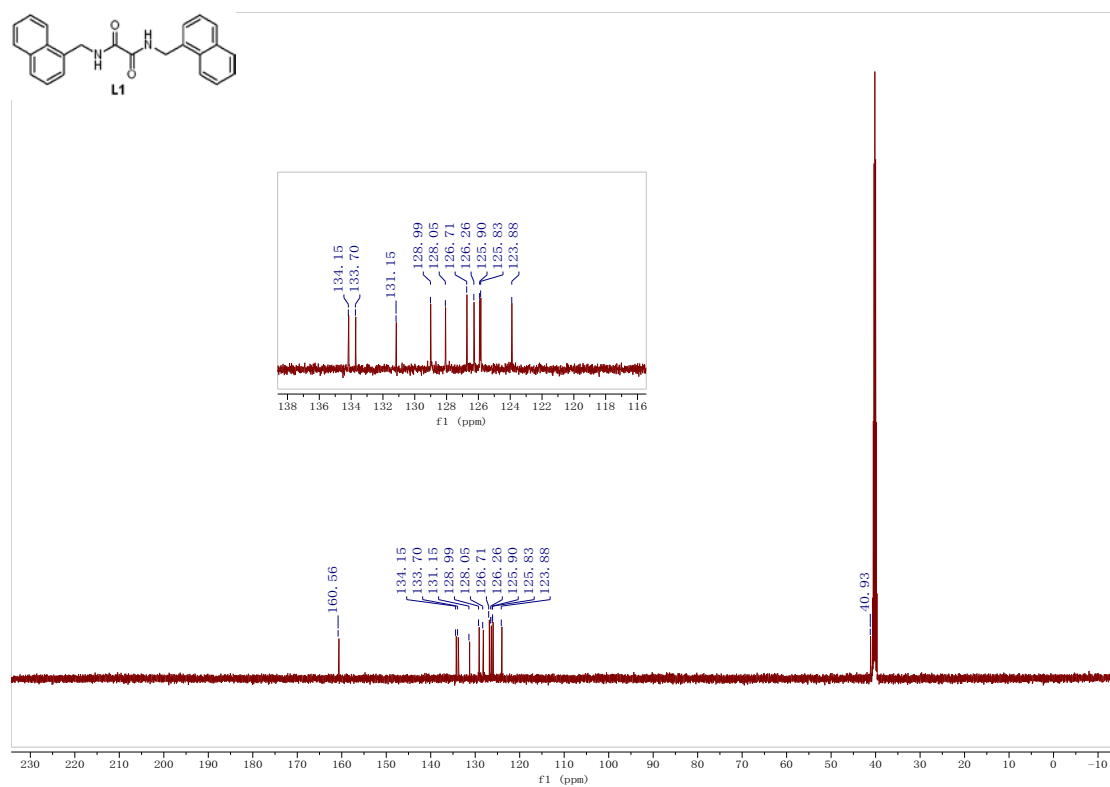

<sup>1</sup>H NMR Spectrum of **3a** (500 MHz, CDCl<sub>3</sub>)

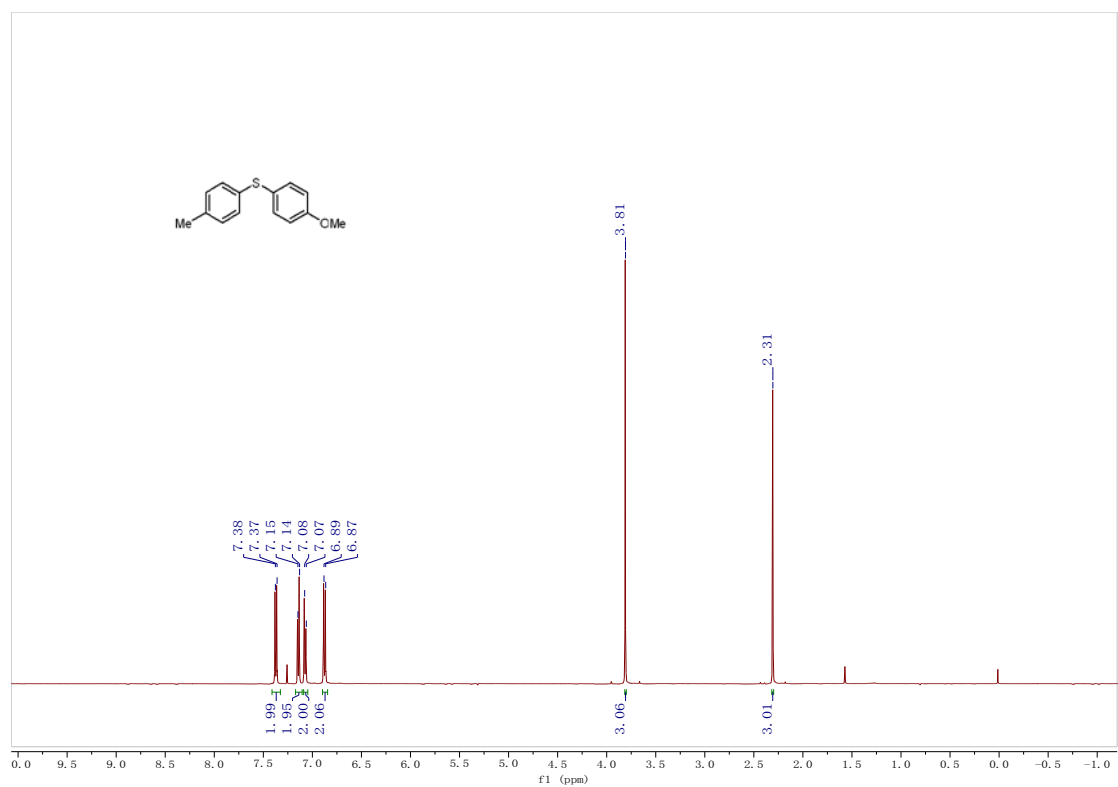

<sup>13</sup>C NMR Spectrum of **3a** (126 MHz, CDCl<sub>3</sub>)

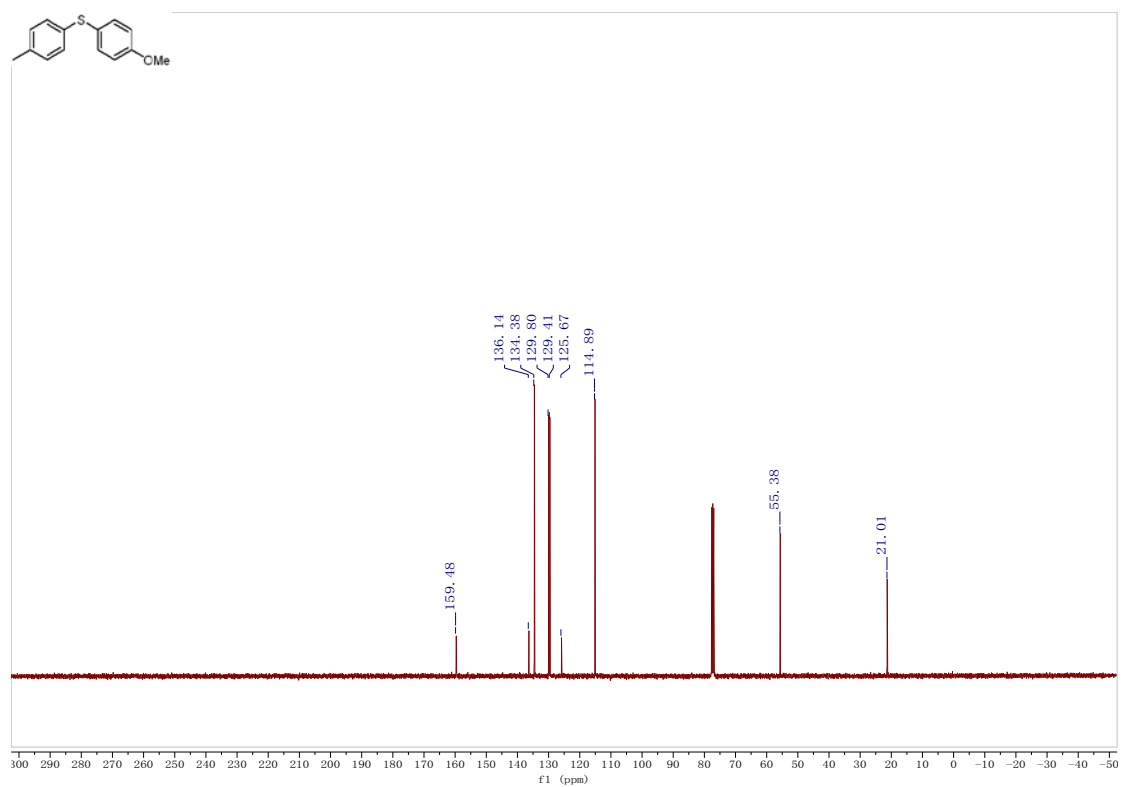

<sup>1</sup>H NMR Spectrum of **3b** (500 MHz, CDCl<sub>3</sub>)

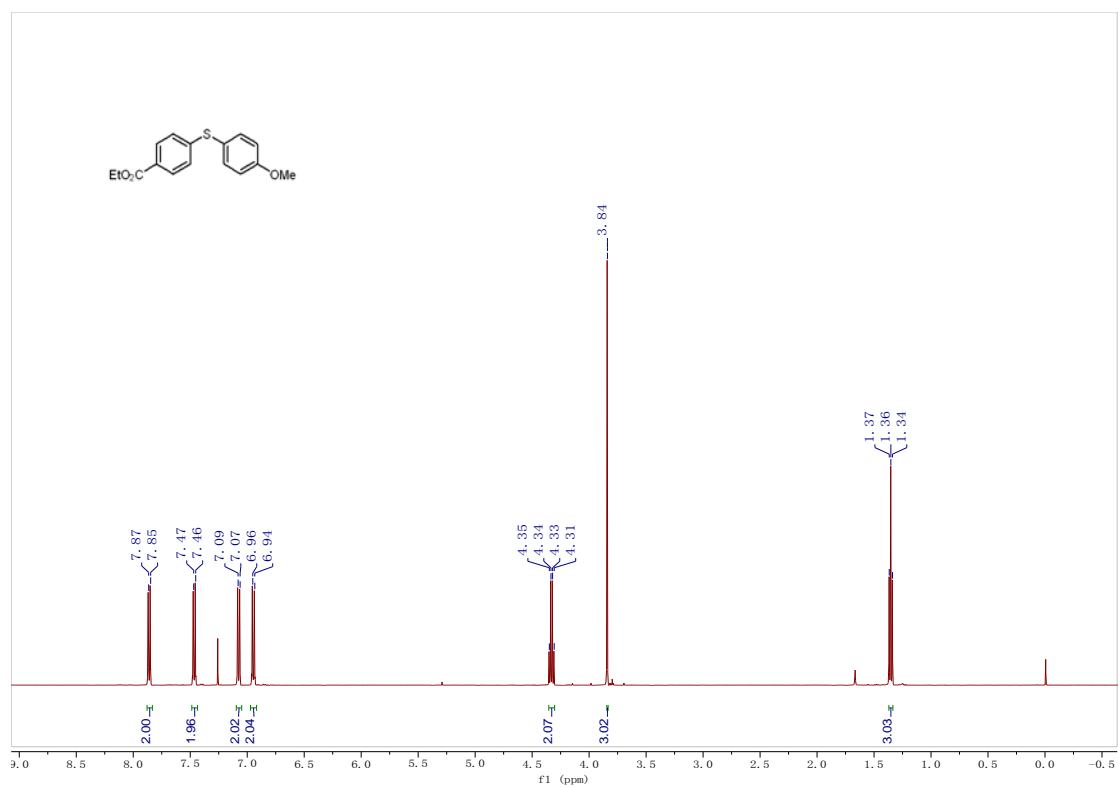

<sup>13</sup>C NMR Spectrum of **3b** (126 MHz, CDCl<sub>3</sub>)

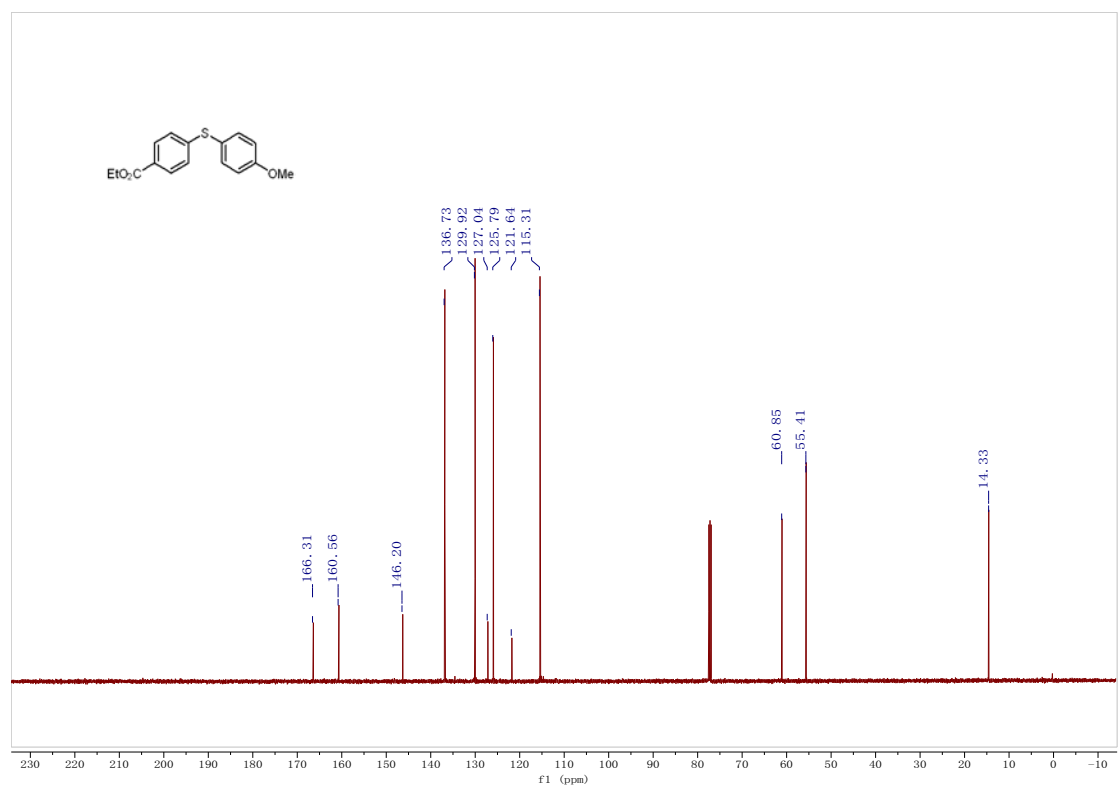

$^1\text{H}$  NMR Spectrum of **3c** (500 MHz,  $\text{CDCl}_3$ )

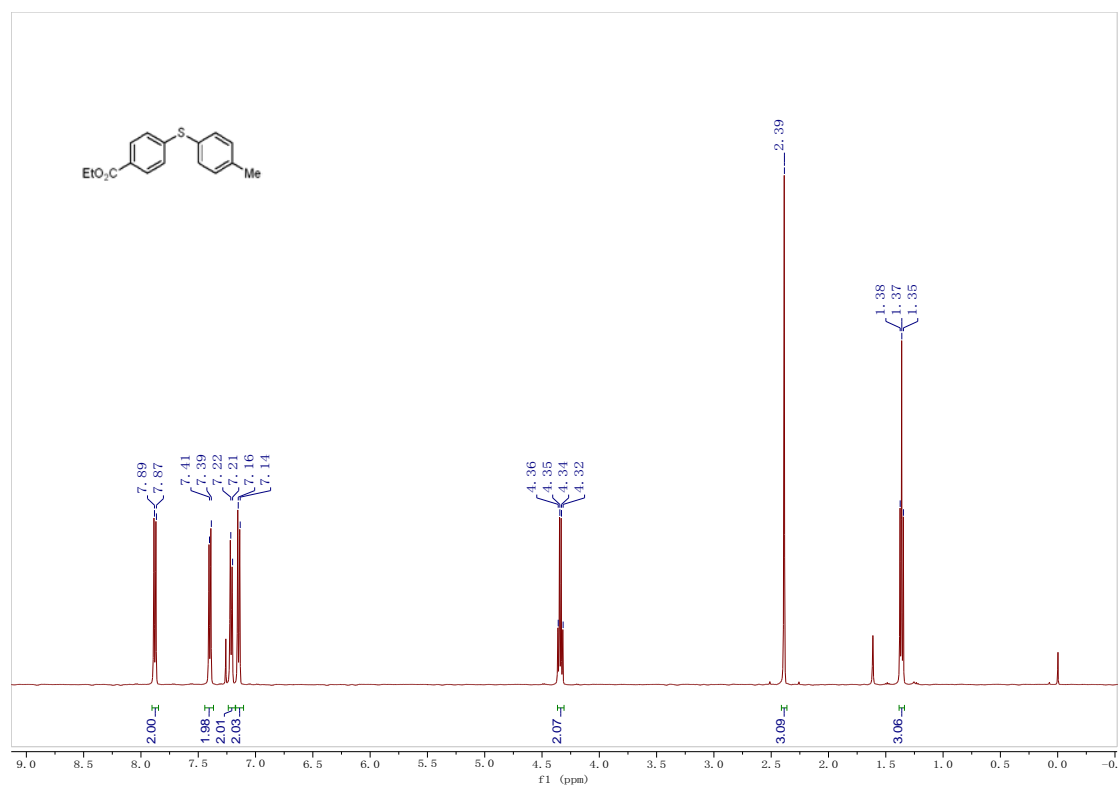

$^{13}\text{C}$  NMR Spectrum of **3c** (126 MHz,  $\text{CDCl}_3$ )

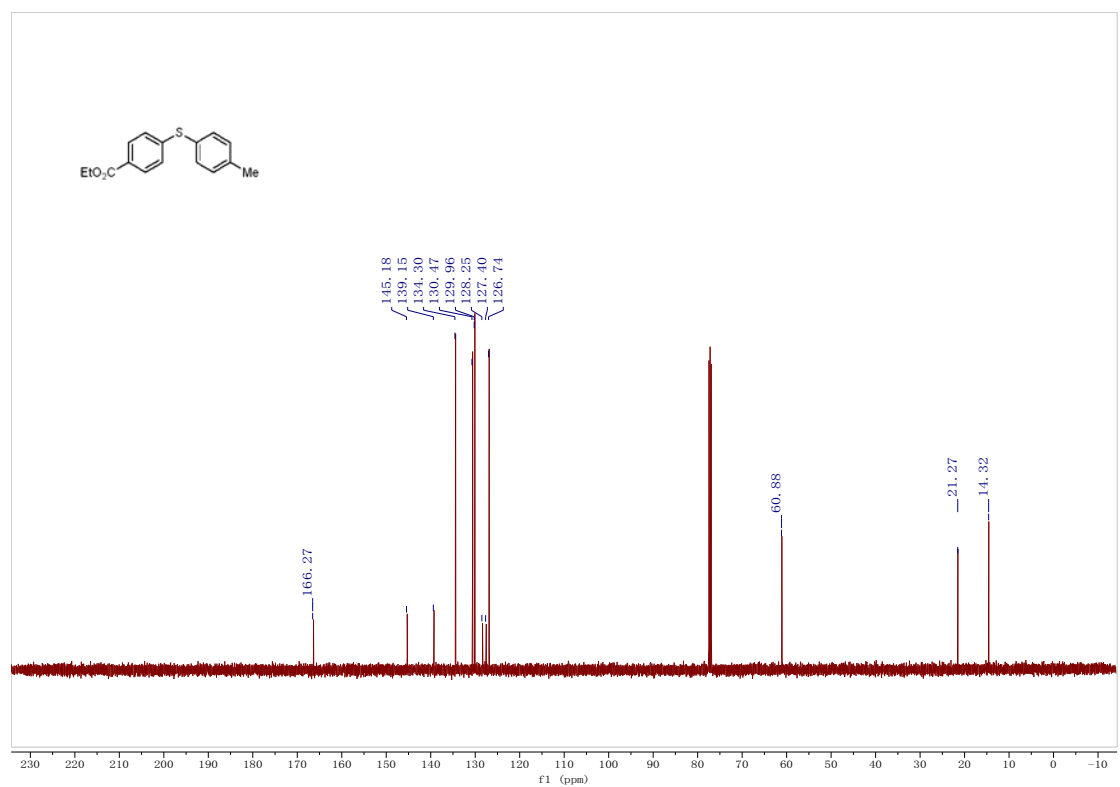

<sup>1</sup>H NMR Spectrum of **3d** (500 MHz, CDCl<sub>3</sub>)

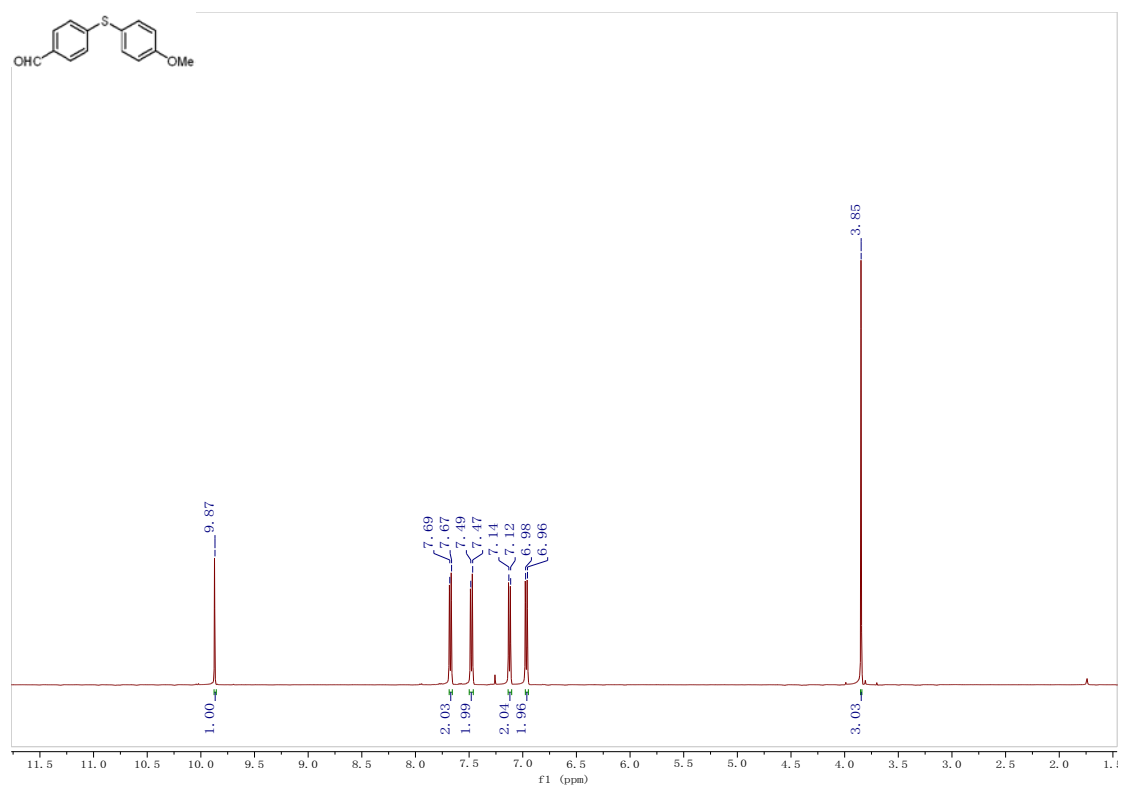

<sup>13</sup>C NMR Spectrum of **3d** (126 MHz, CDCl<sub>3</sub>)

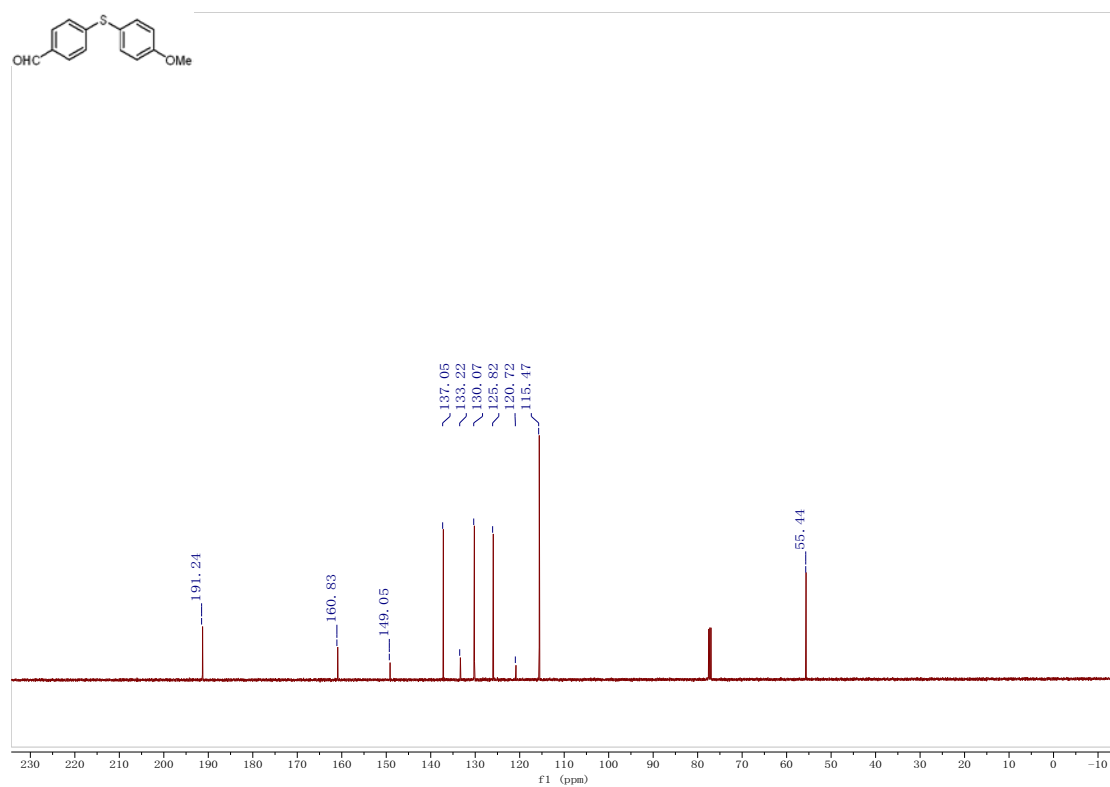

<sup>1</sup>H NMR Spectrum of **3e** (400 MHz, CDCl<sub>3</sub>)

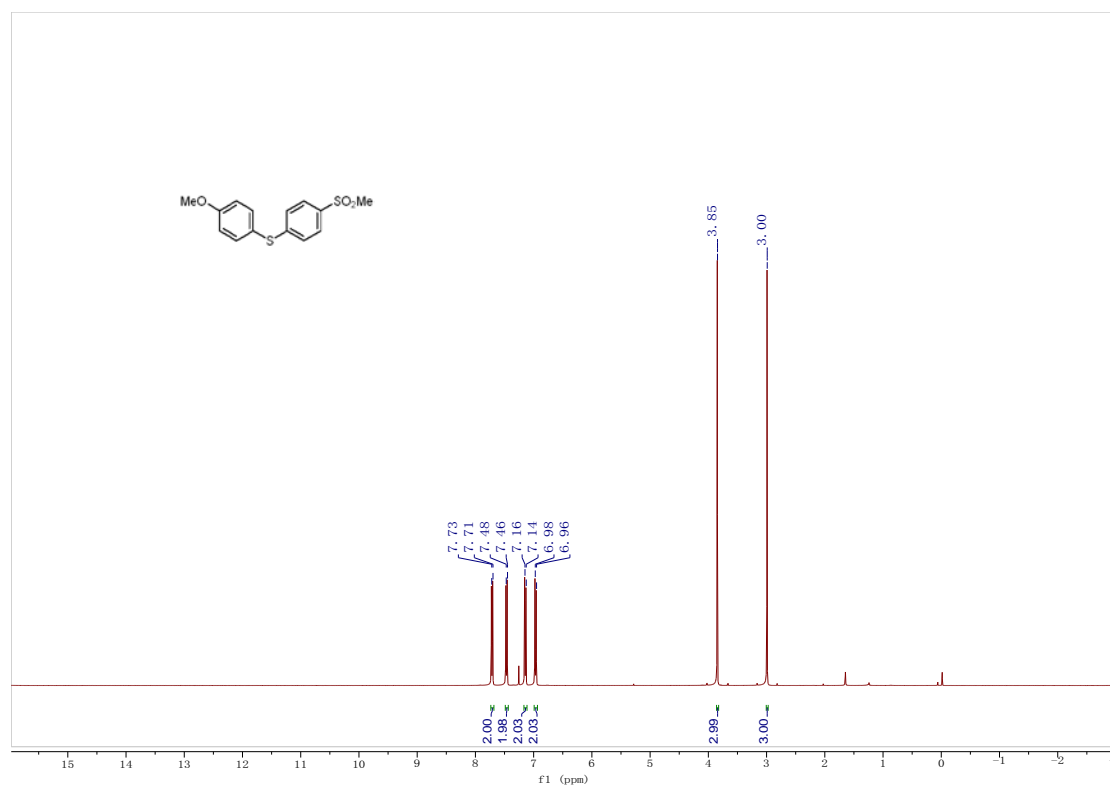

<sup>13</sup>C NMR Spectrum of **3e** (400 MHz, CDCl<sub>3</sub>)

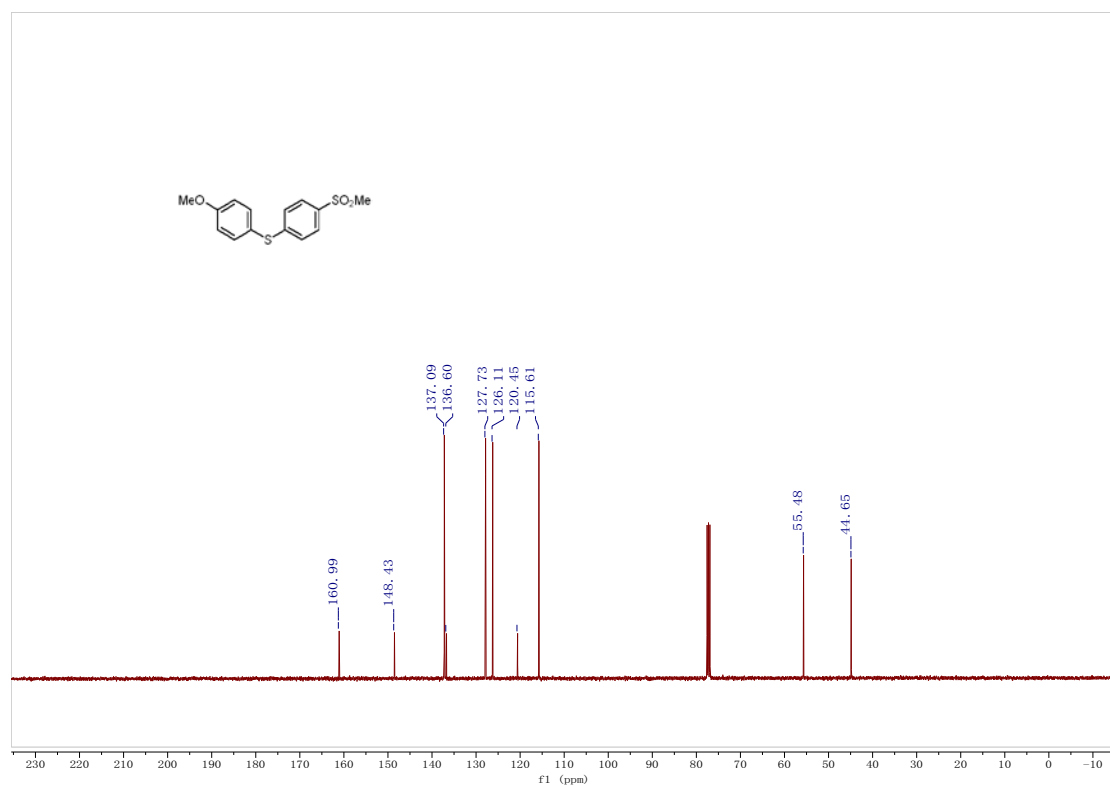

$^1\text{H}$  NMR Spectrum of **3f** (500 MHz,  $\text{CDCl}_3$ )

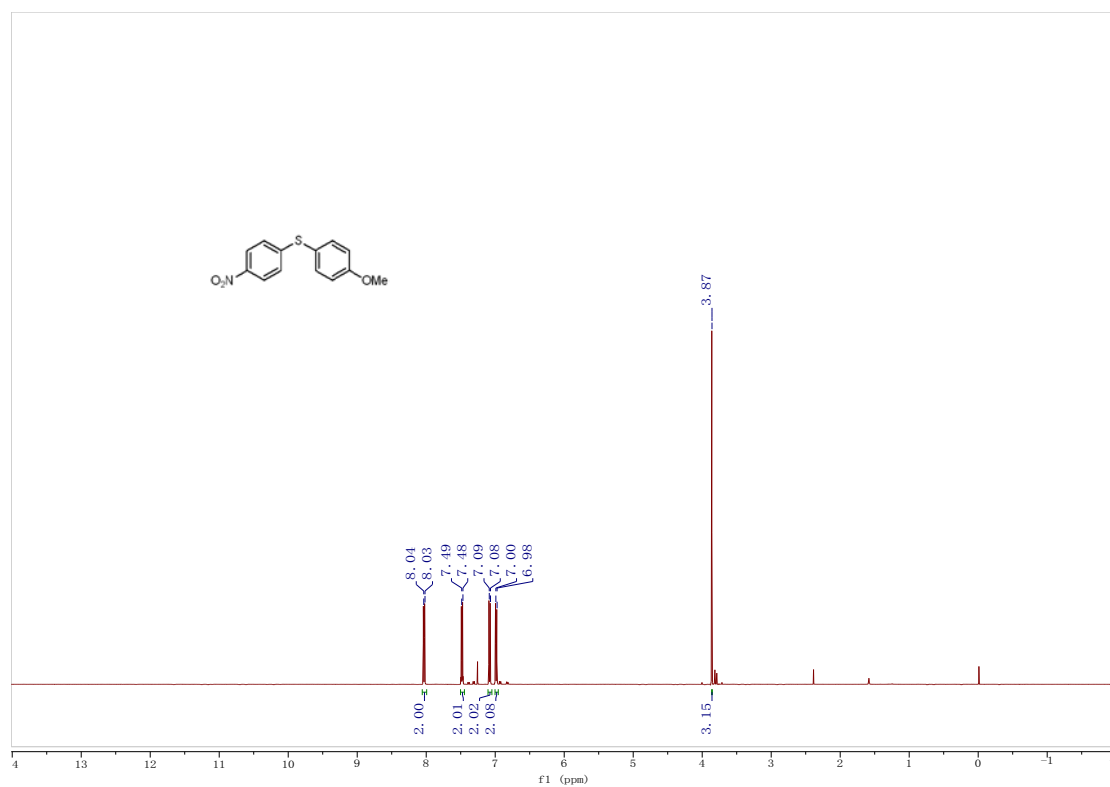

$^{13}\text{C}$  NMR Spectrum of **3f** (126 MHz,  $\text{CDCl}_3$ )

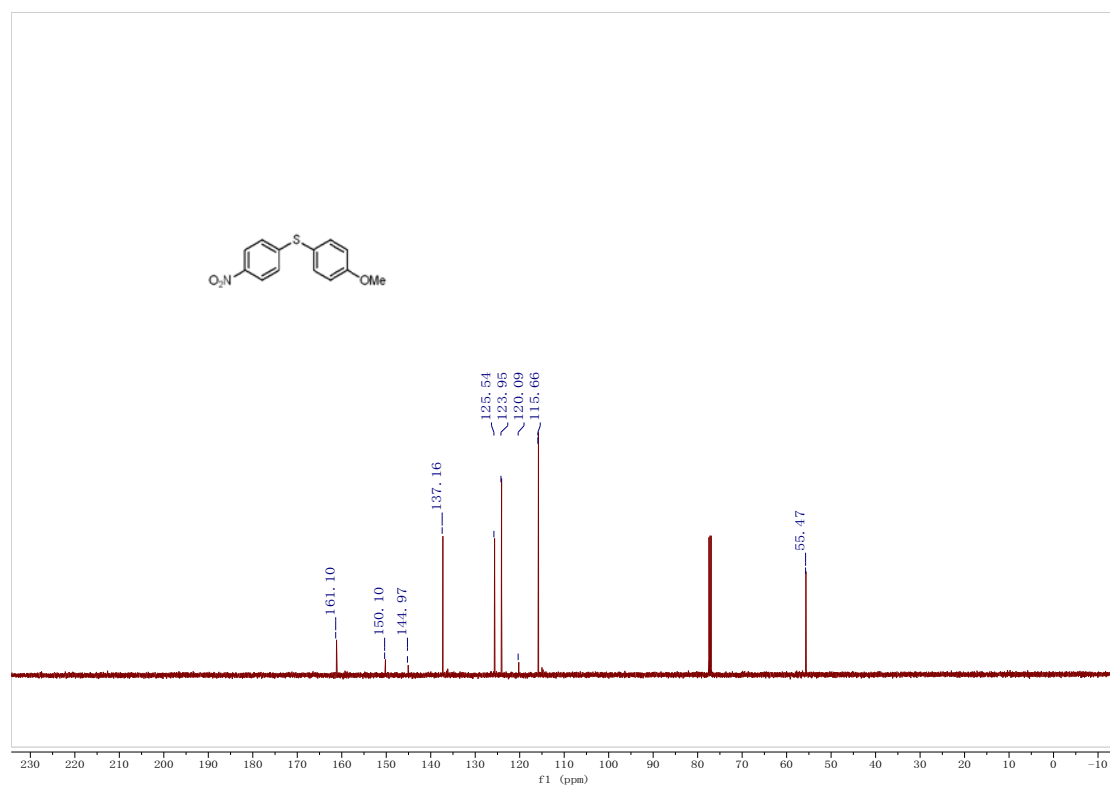



$^1\text{H}$  NMR Spectrum of **3g** (400 MHz,  $\text{CDCl}_3$ )

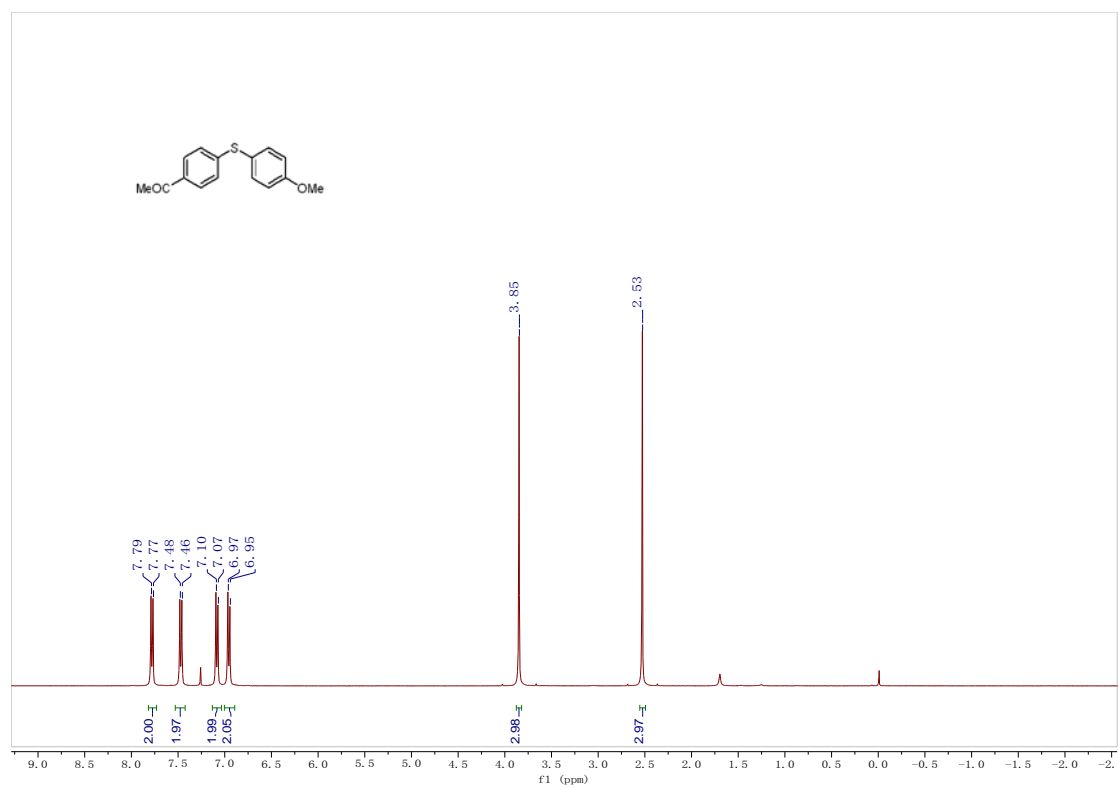

$^{13}\text{C}$  NMR Spectrum of **3g** (101 MHz,  $\text{CDCl}_3$ )

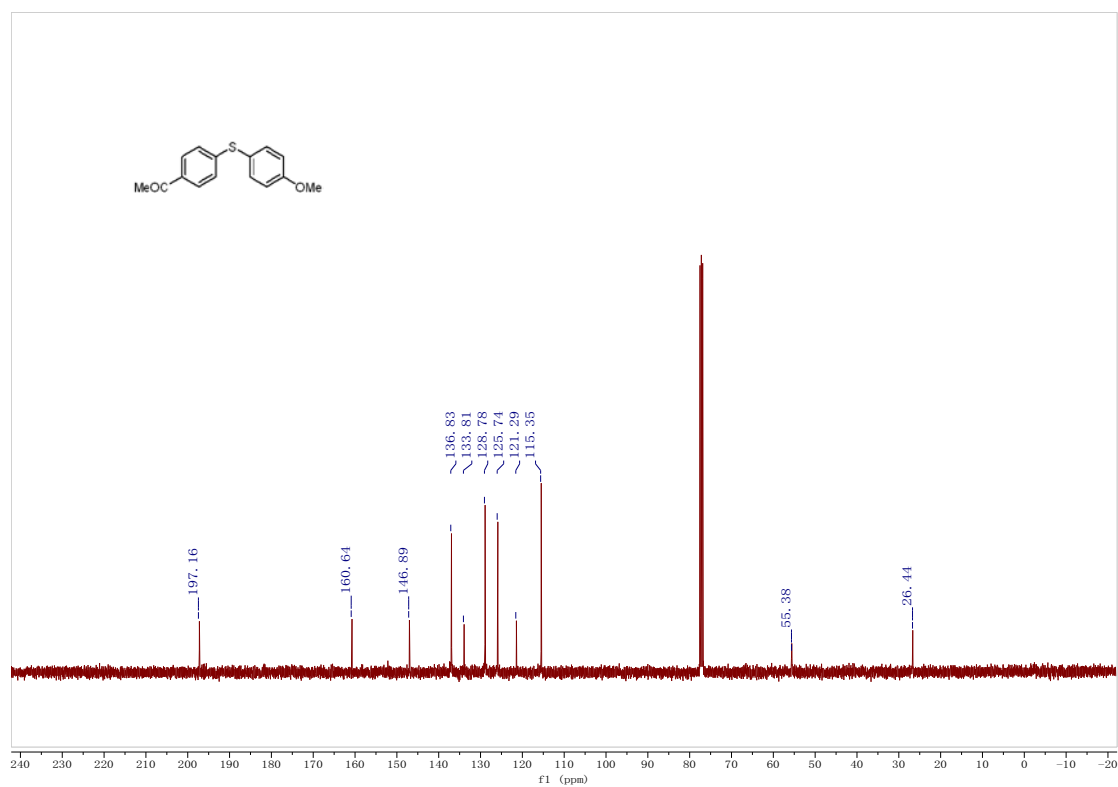

<sup>1</sup>H NMR Spectrum of **3h** (400 MHz, CDCl<sub>3</sub>)

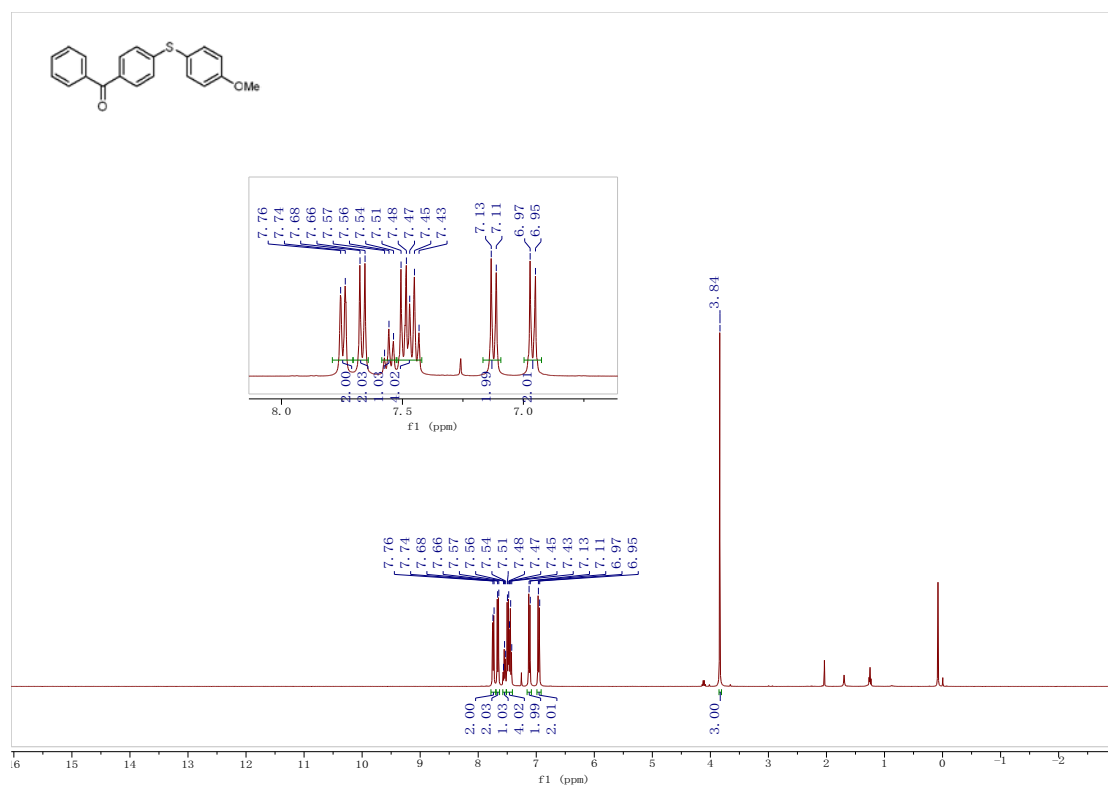

<sup>13</sup>C NMR Spectrum of **3h** (101 MHz, CDCl<sub>3</sub>)

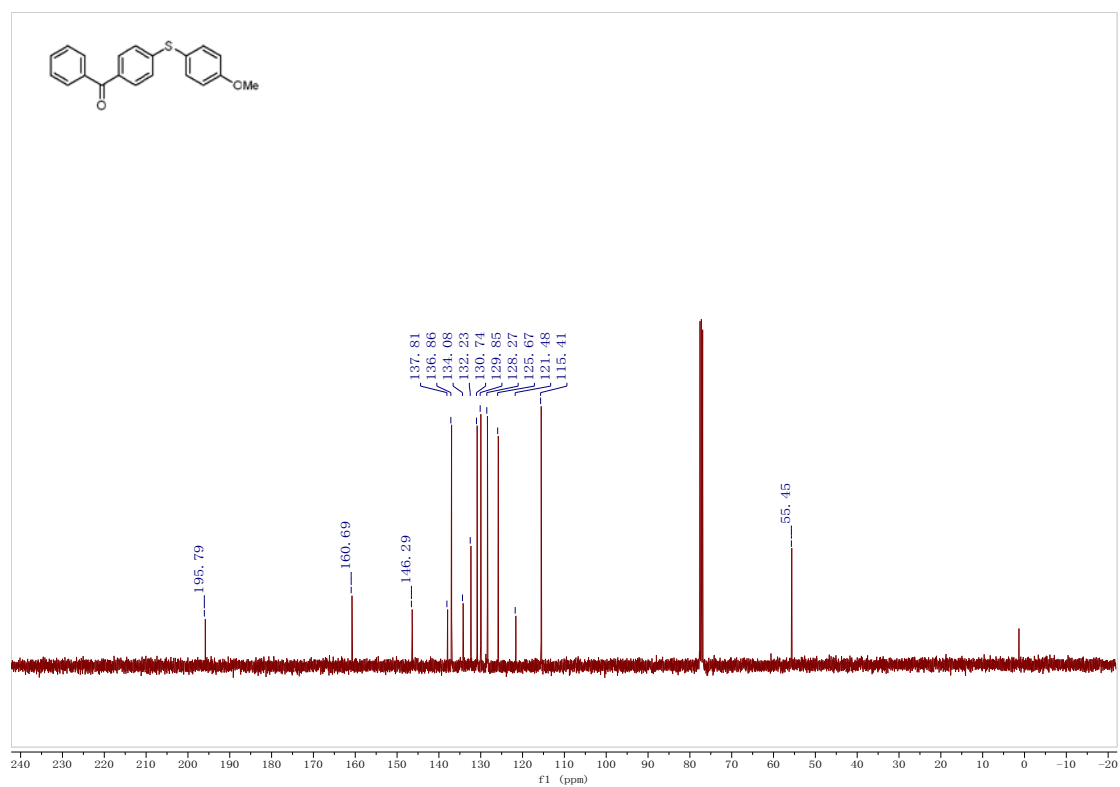

<sup>1</sup>H NMR Spectrum of **3i** (500 MHz, CDCl<sub>3</sub>)

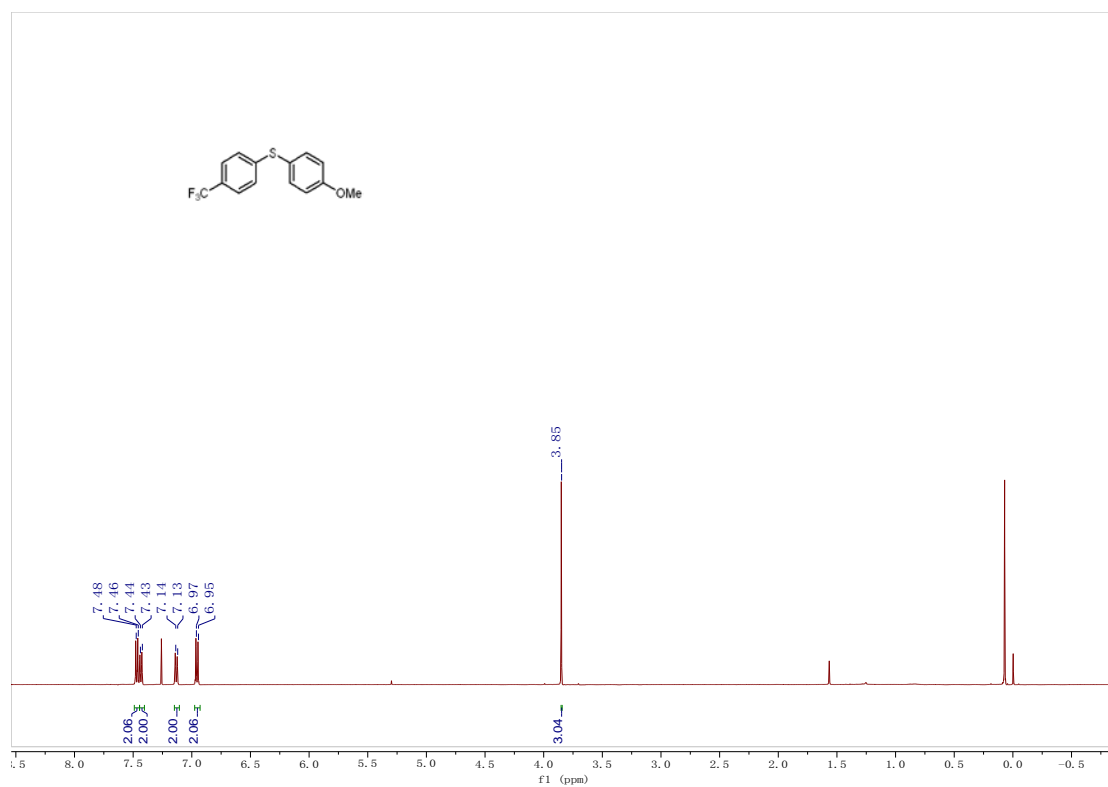

<sup>13</sup>C NMR Spectrum of **3i** (126 MHz, CDCl<sub>3</sub>)

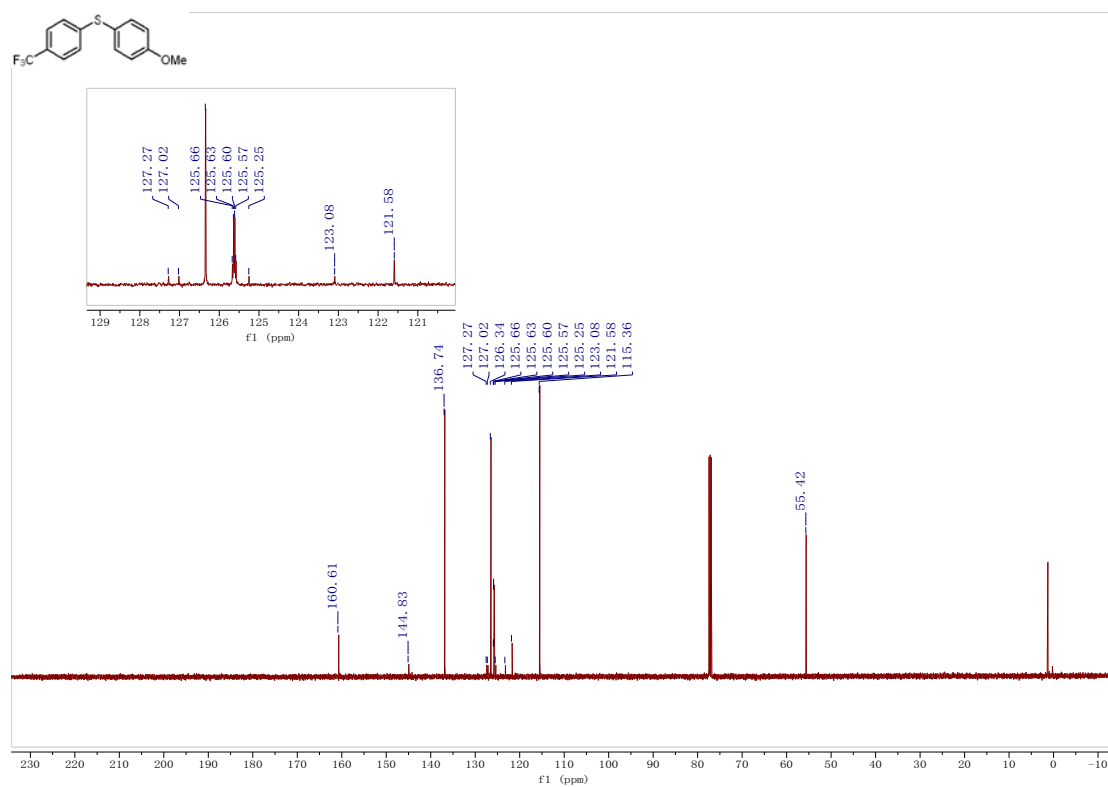

$^{13}\text{F}$  NMR Spectrum of **3i** (376 MHz, DMSO-*d*<sub>6</sub>)

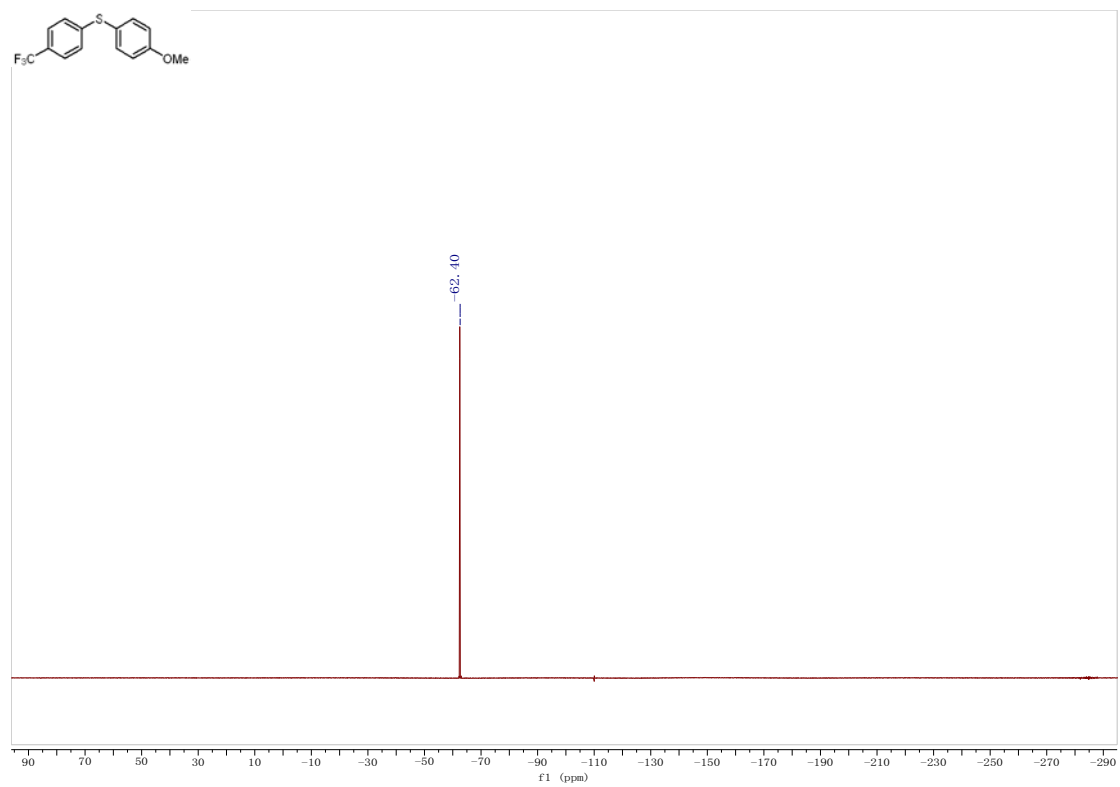

<sup>1</sup>H NMR Spectrum of **3j** (500 MHz, DMSO-*d*<sub>6</sub>)

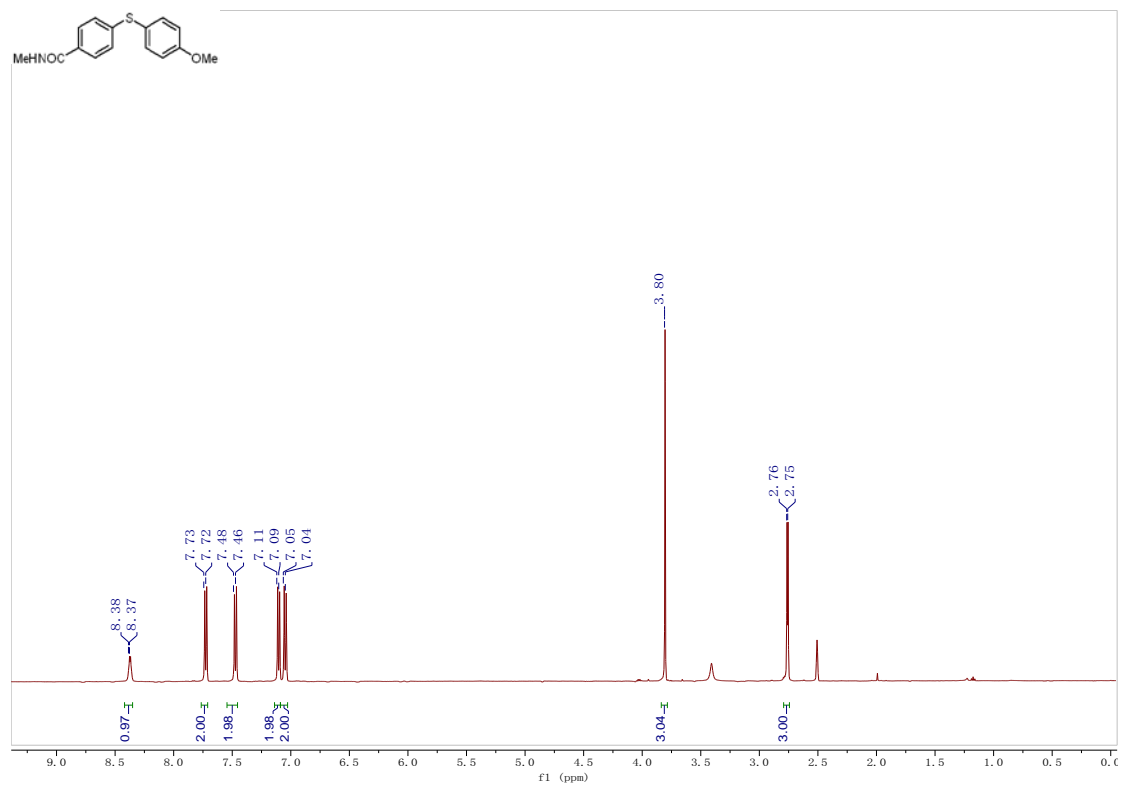

<sup>13</sup>C NMR Spectrum of **3j** (126 MHz, DMSO-*d*<sub>6</sub>)

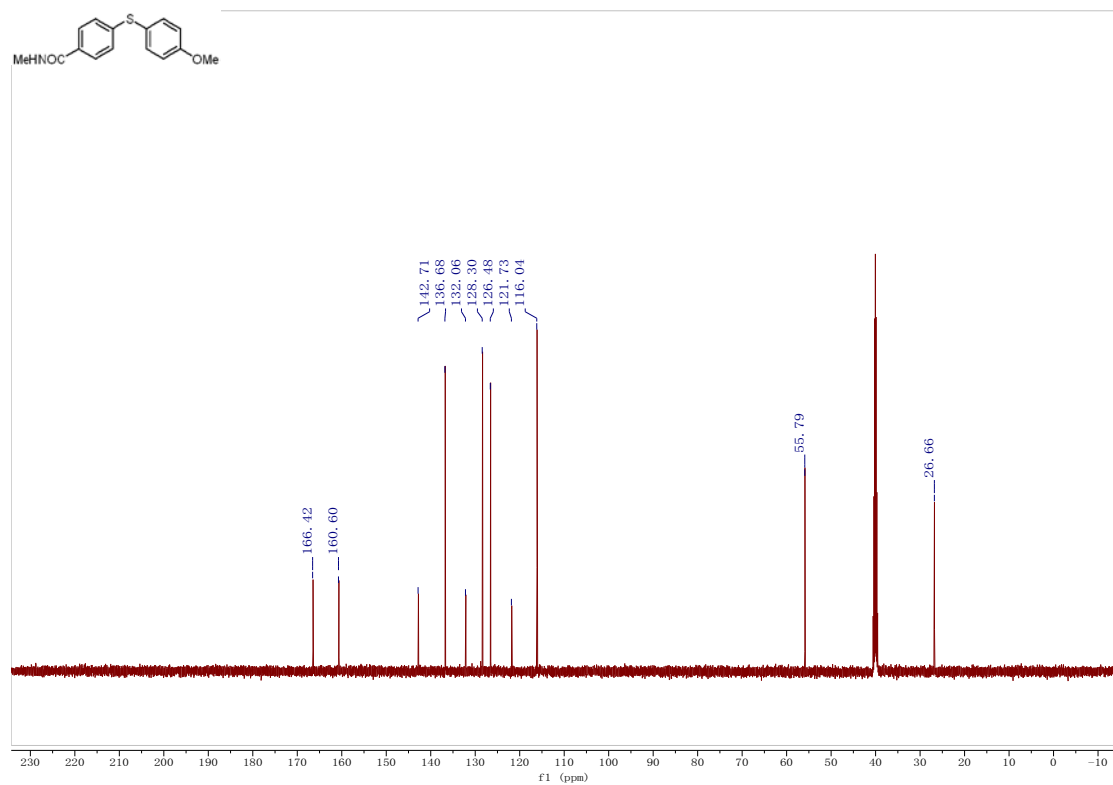

$^1\text{H}$  NMR Spectrum of **3k** (400 MHz,  $\text{CDCl}_3$ )

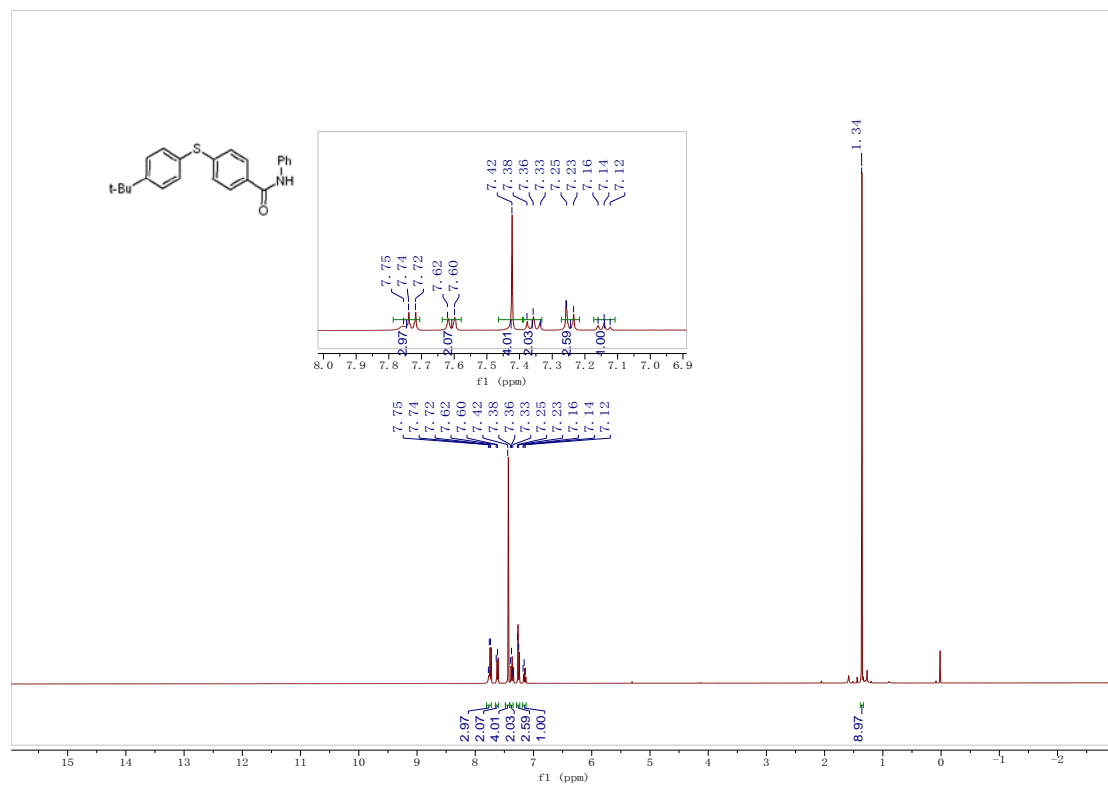

$^{13}\text{C}$  NMR Spectrum of **3k** (101 MHz,  $\text{CDCl}_3$ )

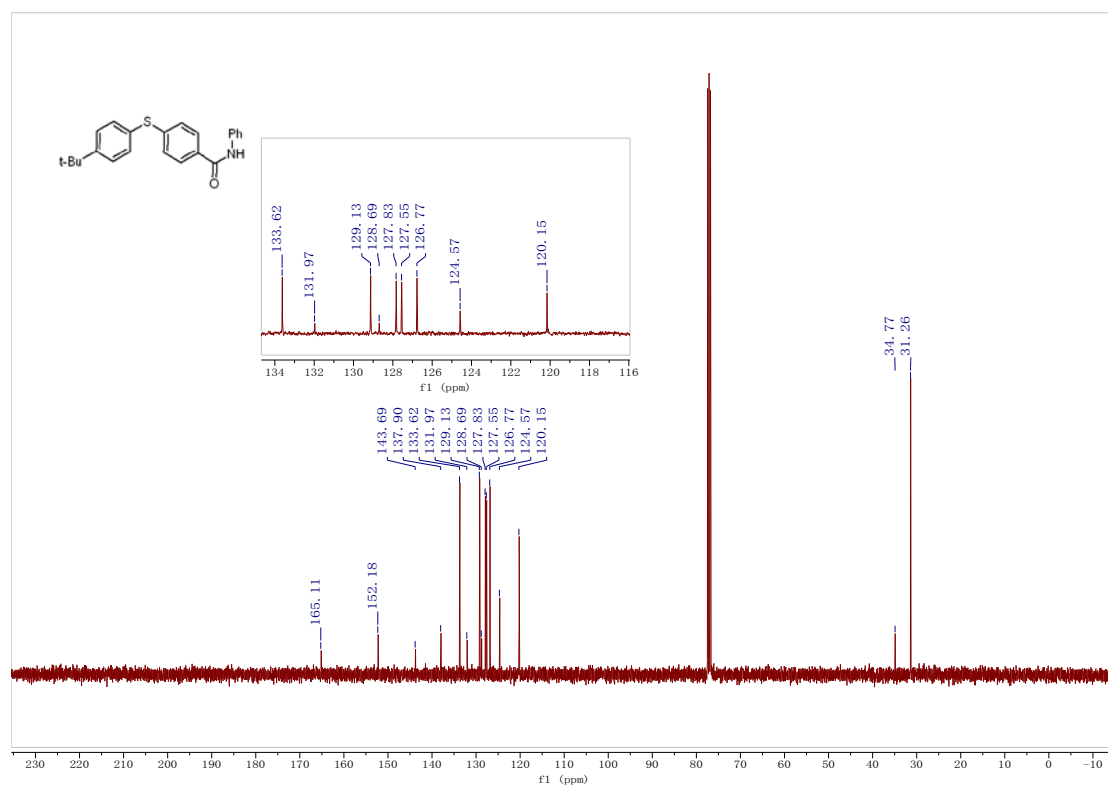

<sup>1</sup>H NMR Spectrum of **31** (400 MHz, CDCl<sub>3</sub>)

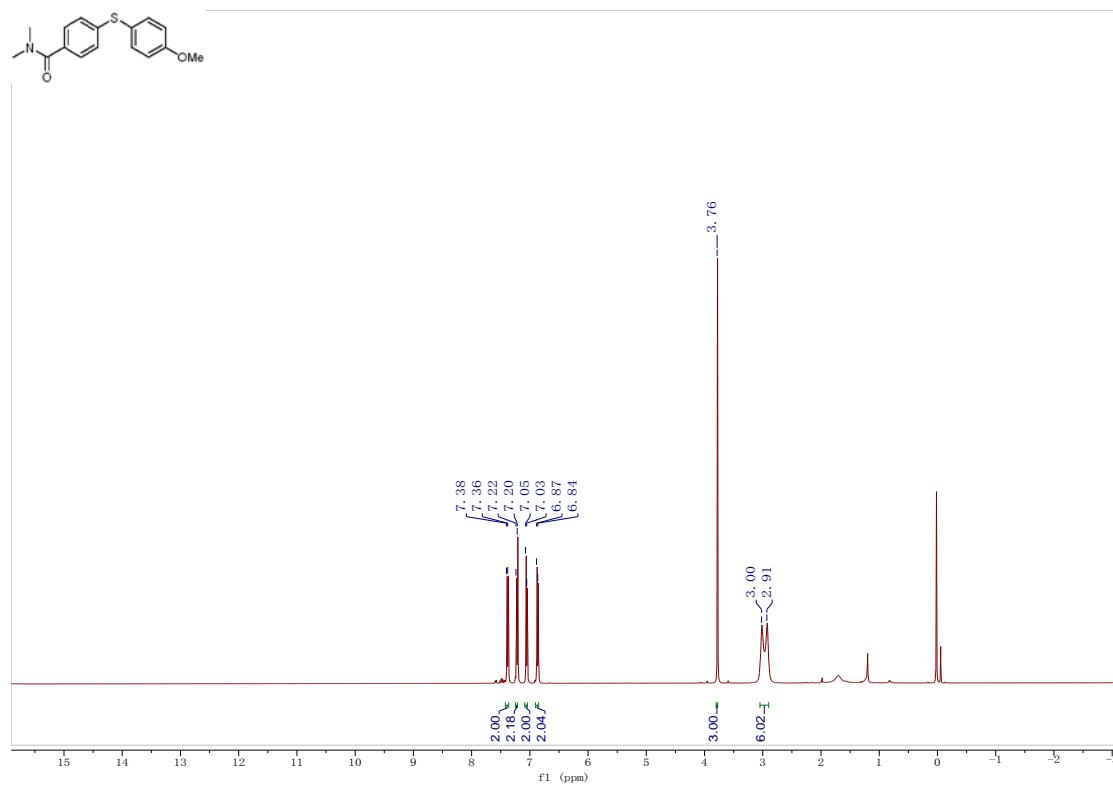

<sup>13</sup>C NMR Spectrum of **31** (101 MHz, CDCl<sub>3</sub>)

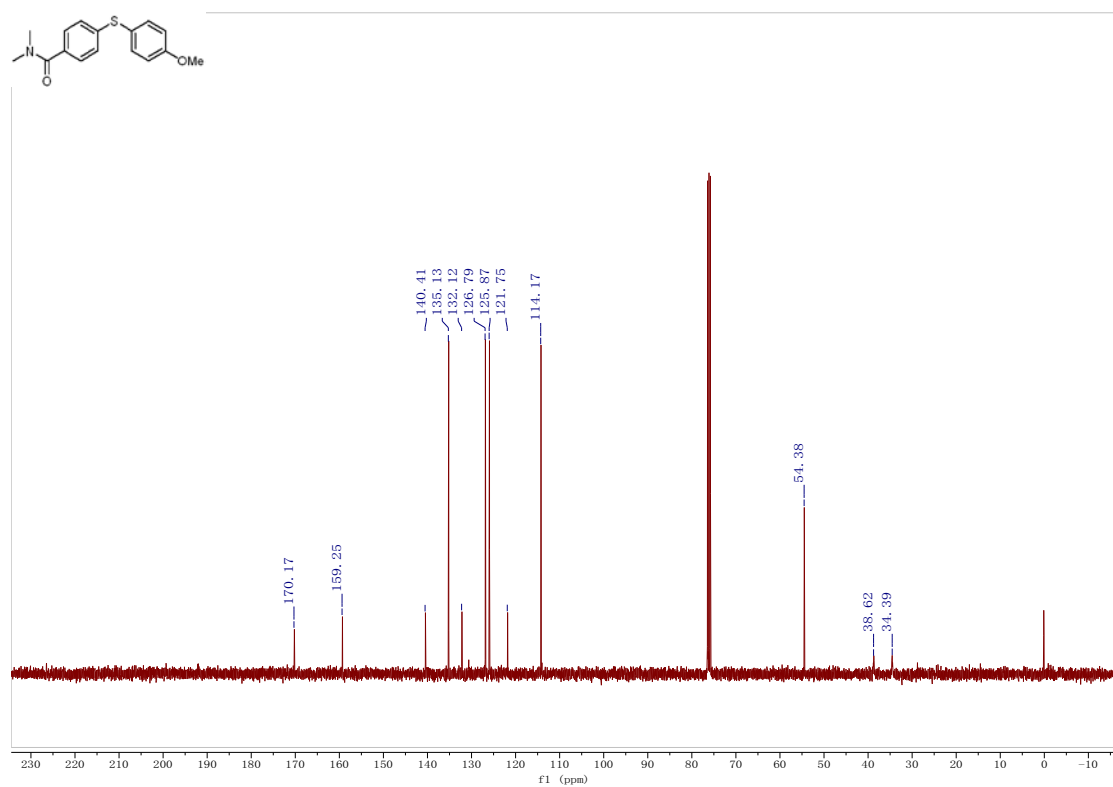

$^1\text{H}$  NMR Spectrum of **3m** (500 MHz,  $\text{CDCl}_3$ )

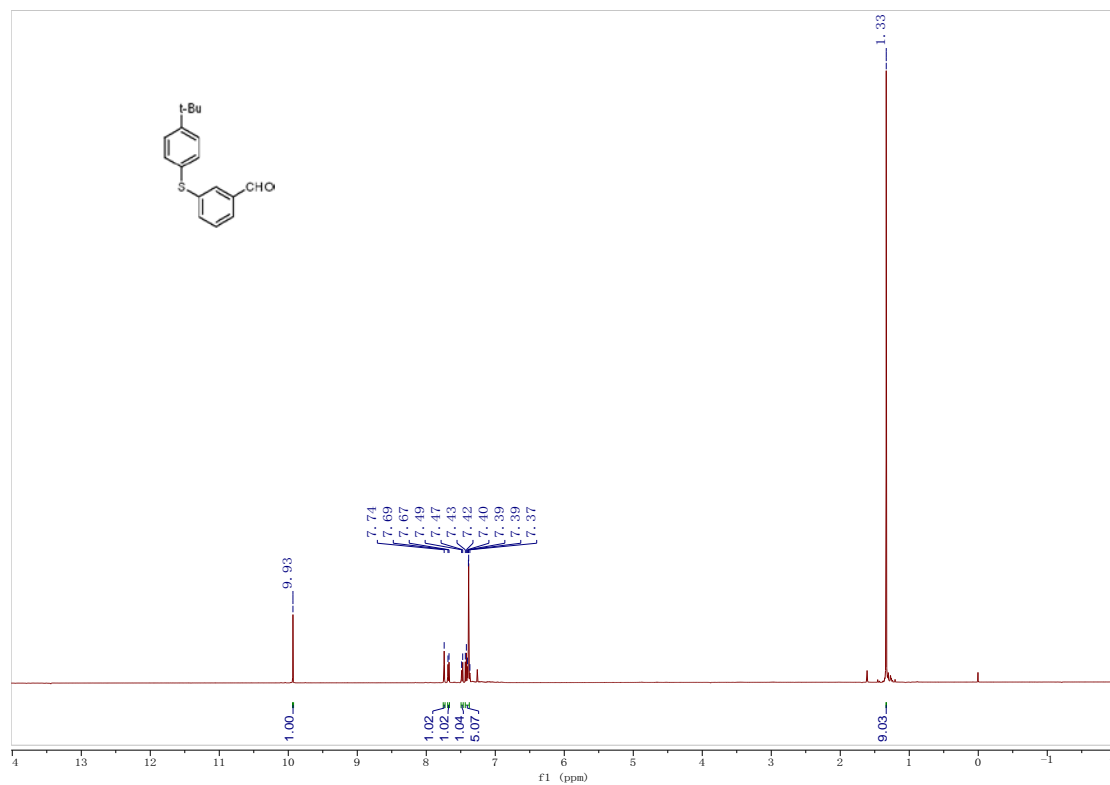

$^{13}\text{C}$  NMR Spectrum of **3m** (126 MHz,  $\text{CDCl}_3$ )

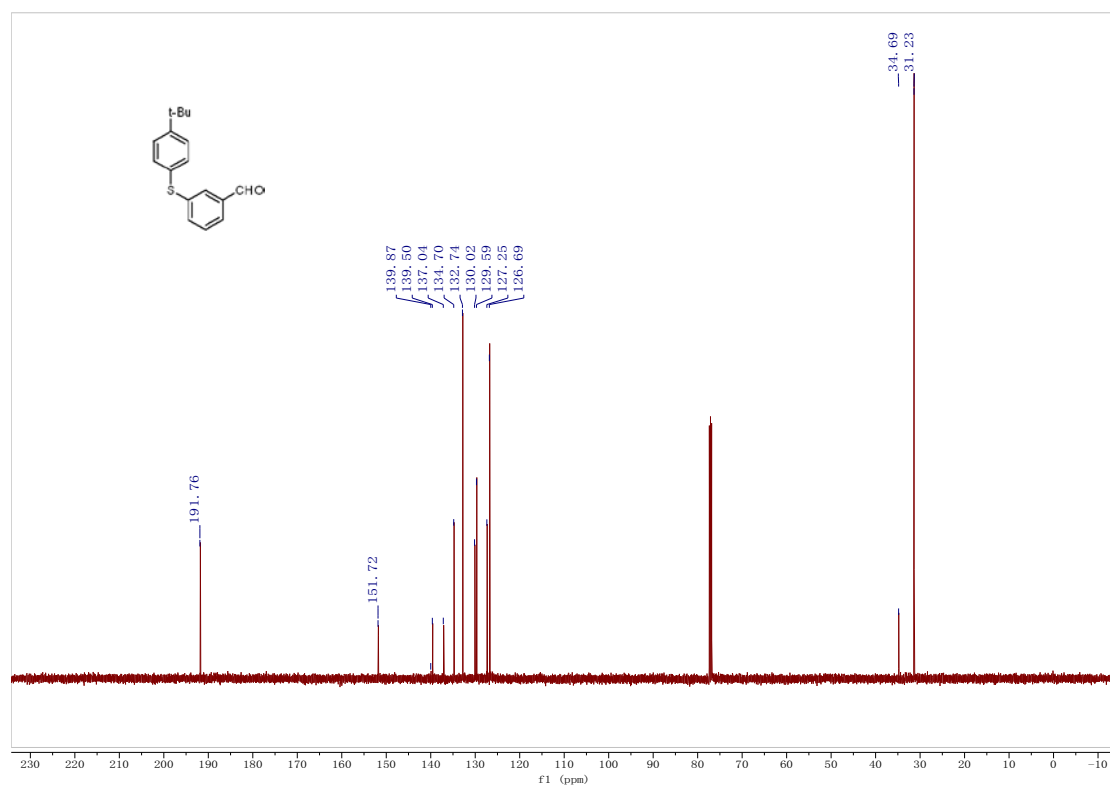



<sup>1</sup>H NMR Spectrum of **3n** (500 MHz, CDCl<sub>3</sub>)

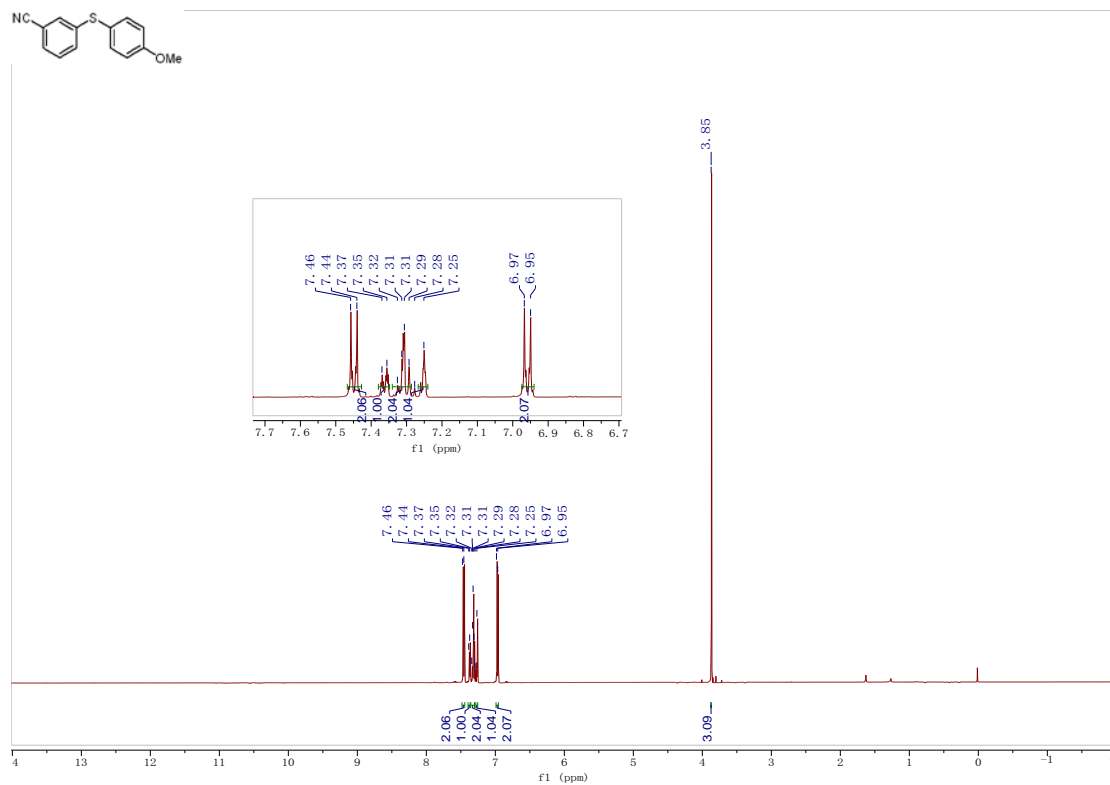

<sup>13</sup>C NMR Spectrum of **3n** (126 MHz, CDCl<sub>3</sub>)

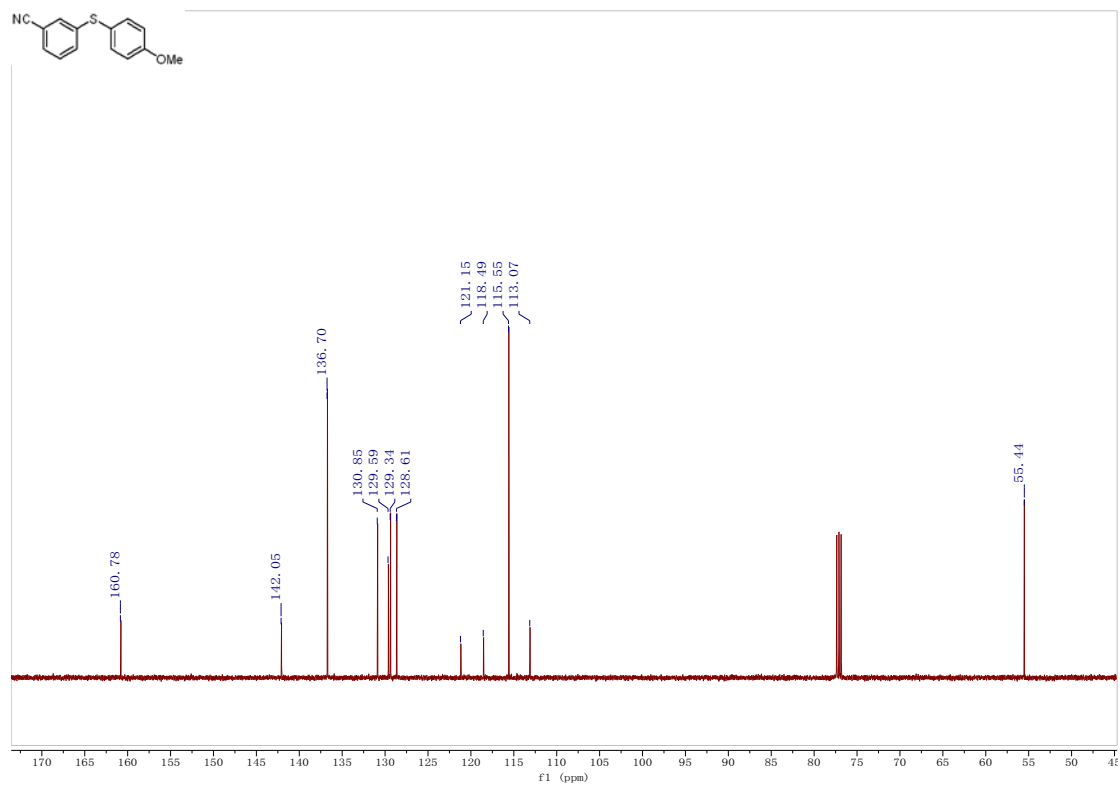

<sup>1</sup>H NMR Spectrum of **3o** (400 MHz, CDCl<sub>3</sub>)

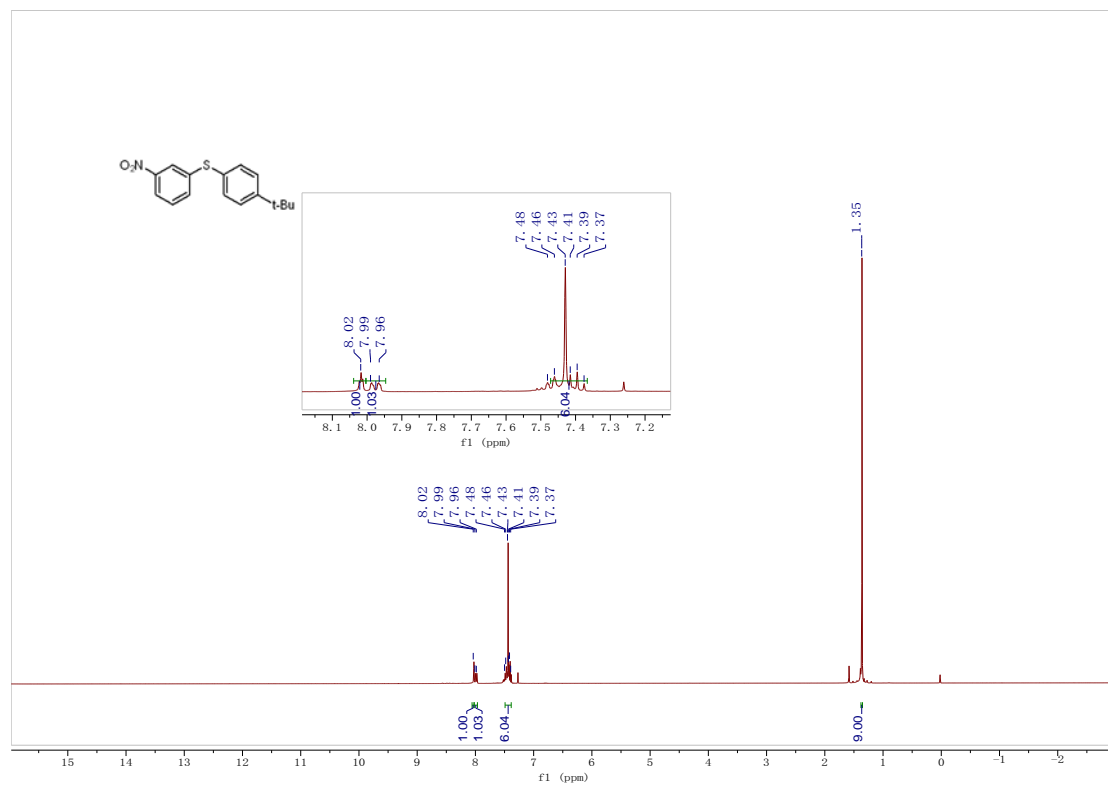

<sup>13</sup>C NMR Spectrum of **3o** (101 MHz, CDCl<sub>3</sub>)

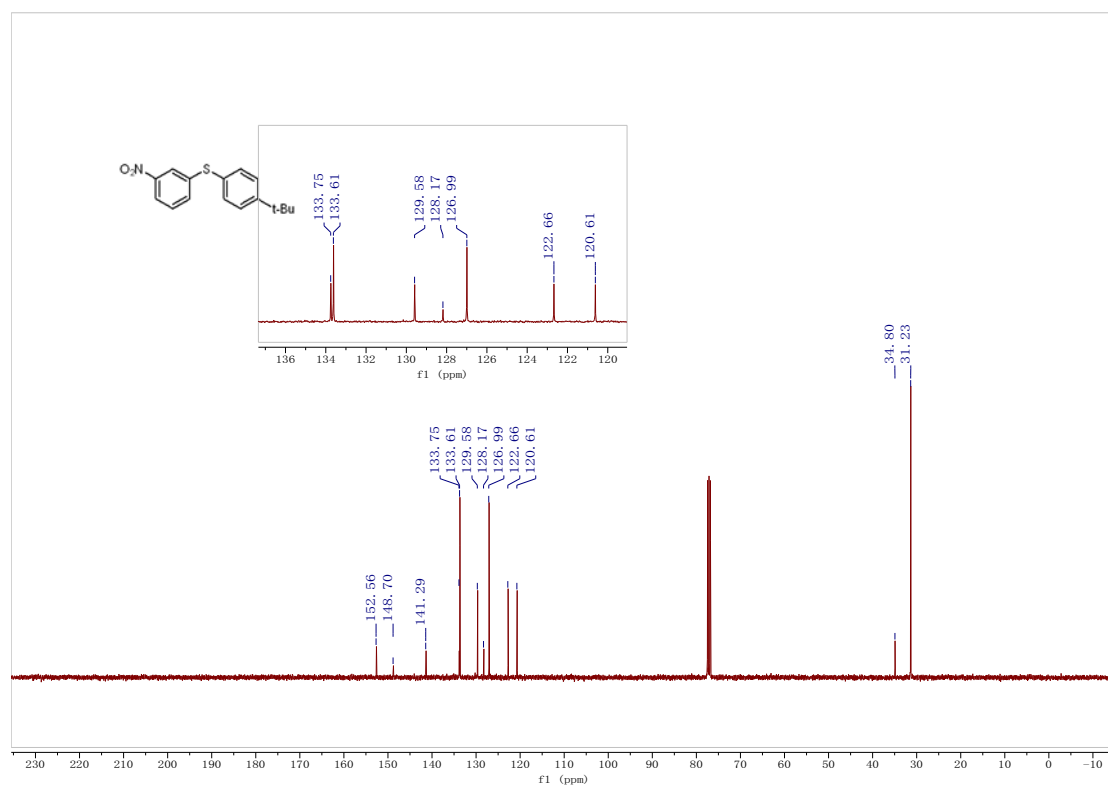

### <sup>1</sup>H NMR Spectrum of **3p** (500 MHz, CDCl<sub>3</sub>)

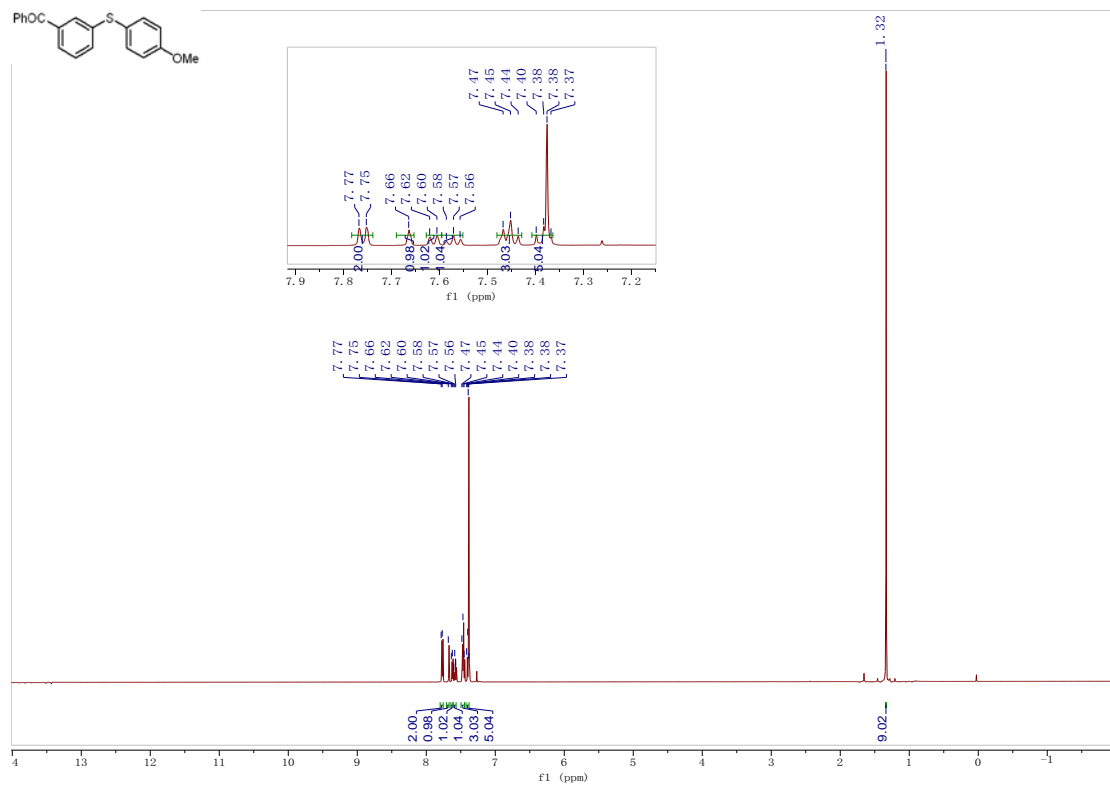

### <sup>13</sup>C NMR Spectrum of **3p** (126 MHz, CDCl<sub>3</sub>)

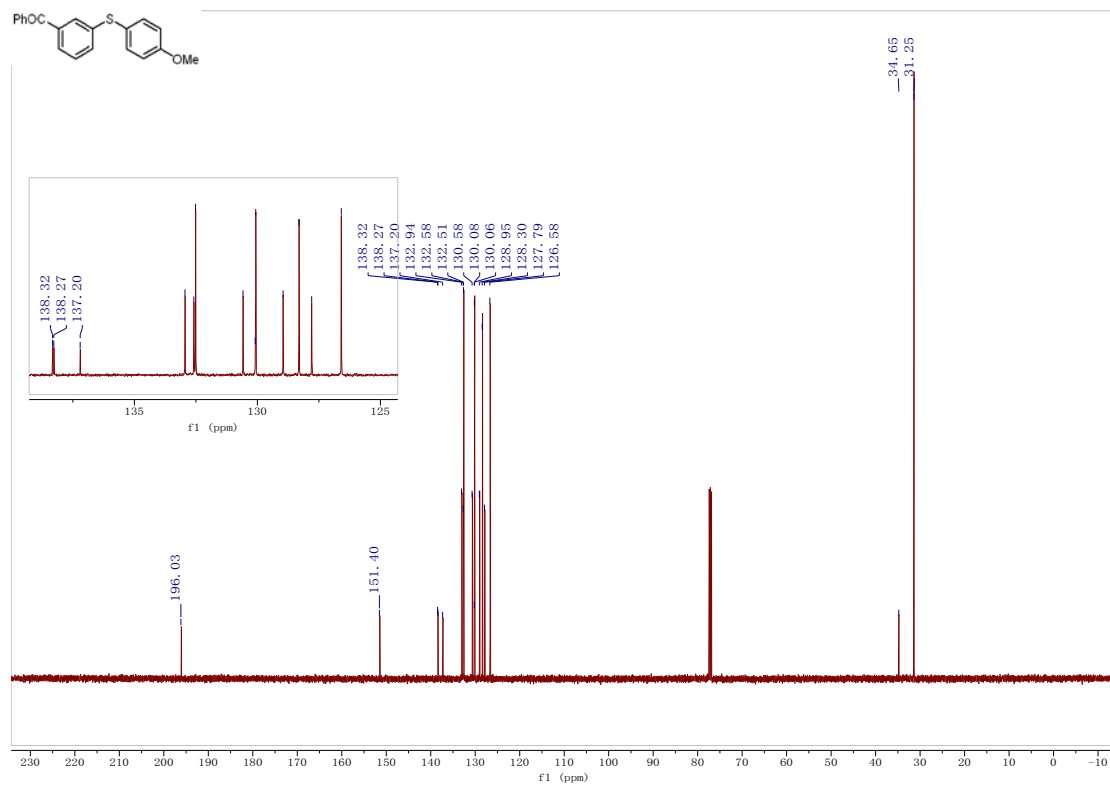

<sup>1</sup>H NMR Spectrum of **3r** (400 MHz, CDCl<sub>3</sub>)

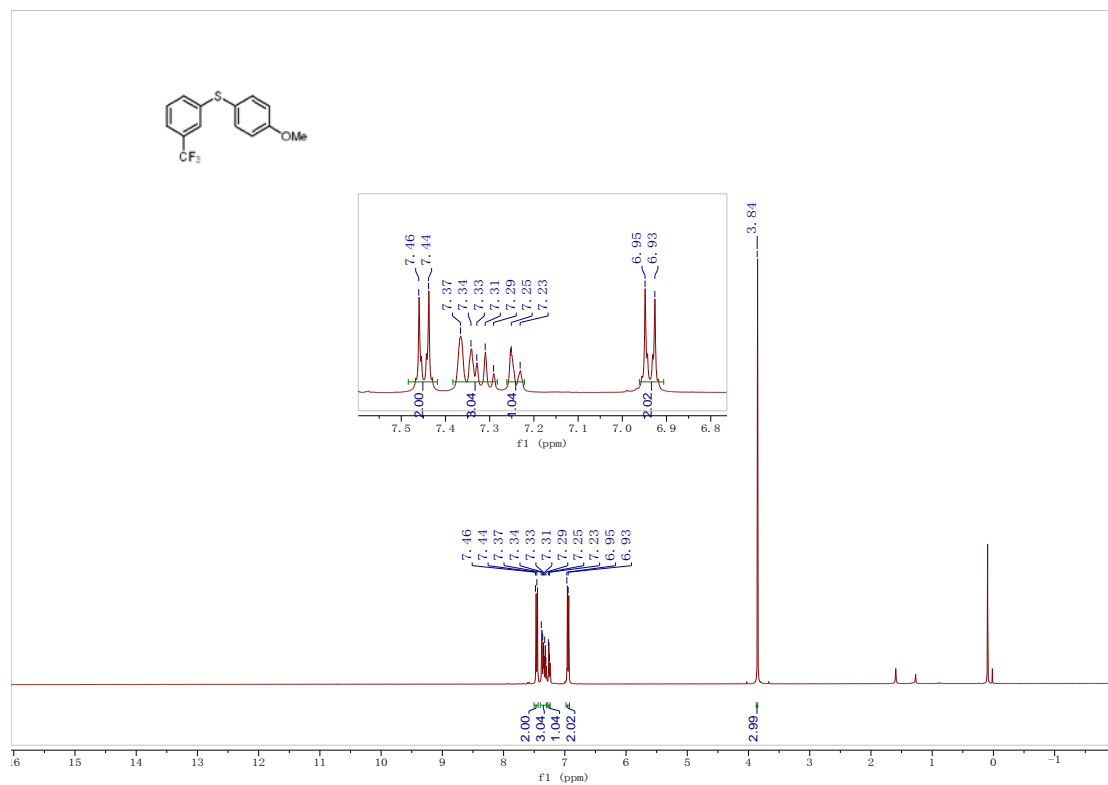

<sup>13</sup>C NMR Spectrum of **3r** (101 MHz, CDCl<sub>3</sub>)

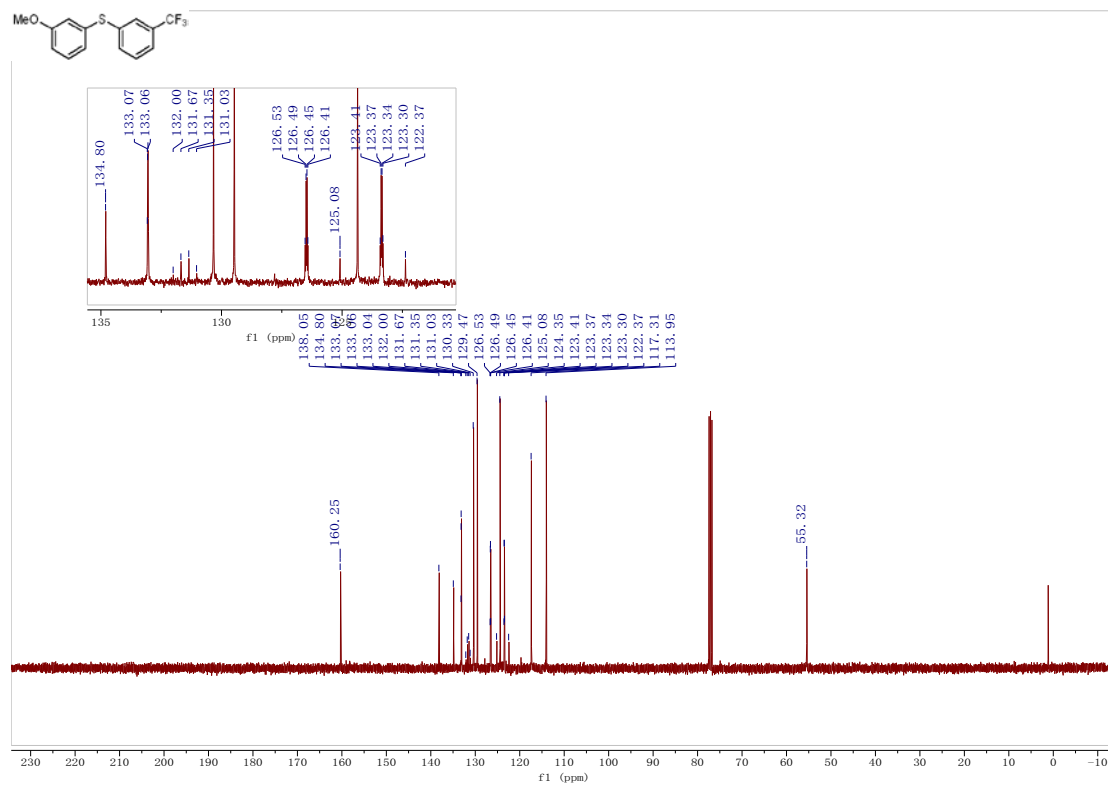

<sup>19</sup>F NMR Spectrum of **3r** (376 MHz, CDCl<sub>3</sub>)

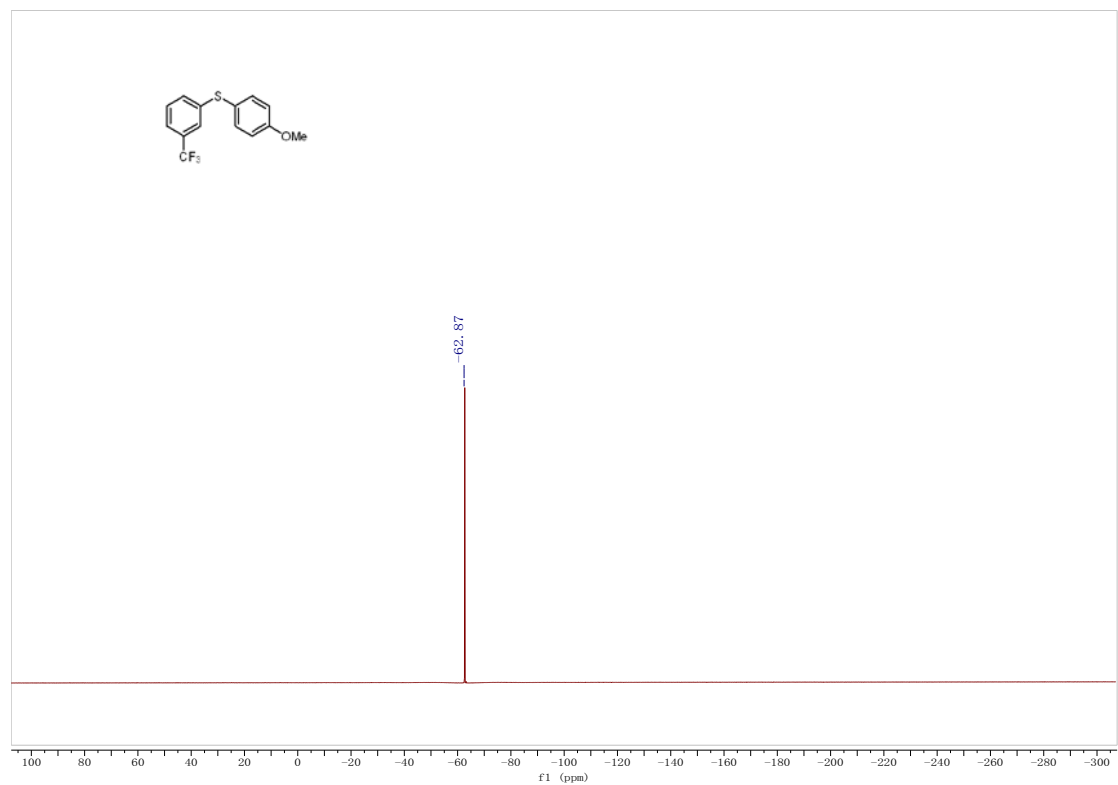

<sup>1</sup>H NMR Spectrum of **3s** (400 MHz, CDCl<sub>3</sub>)

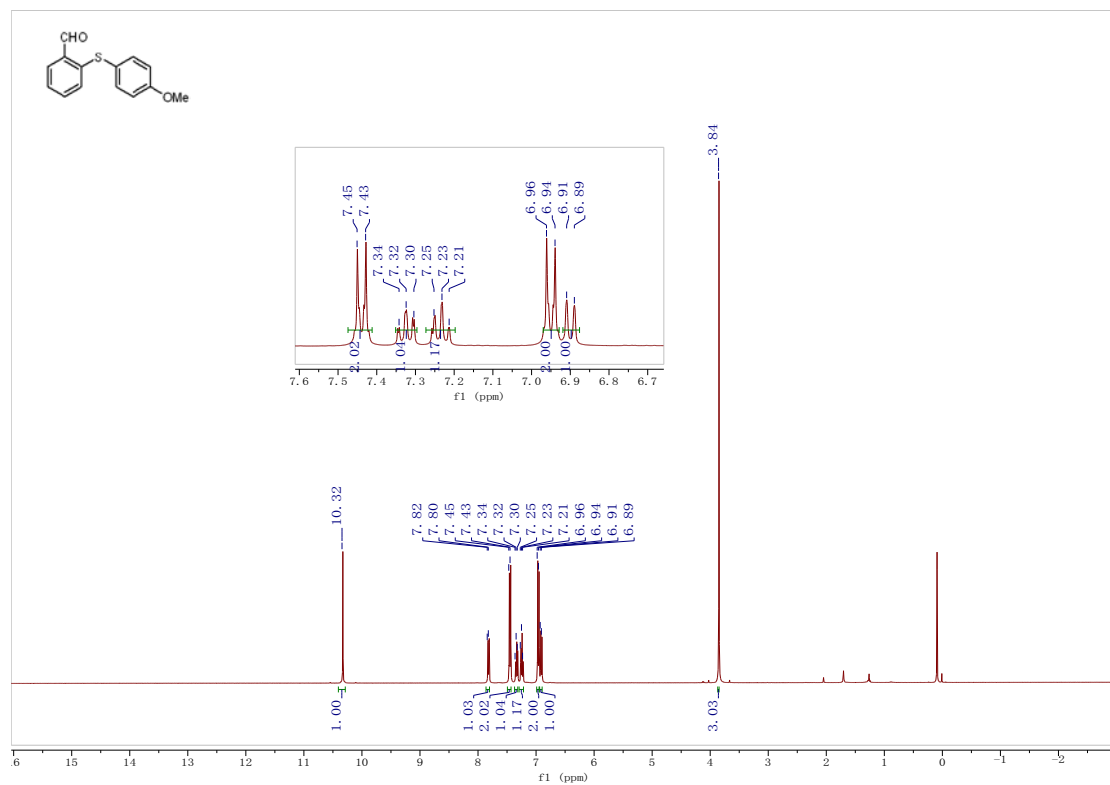

<sup>13</sup>C NMR Spectrum of **3s** (101 MHz, CDCl<sub>3</sub>)

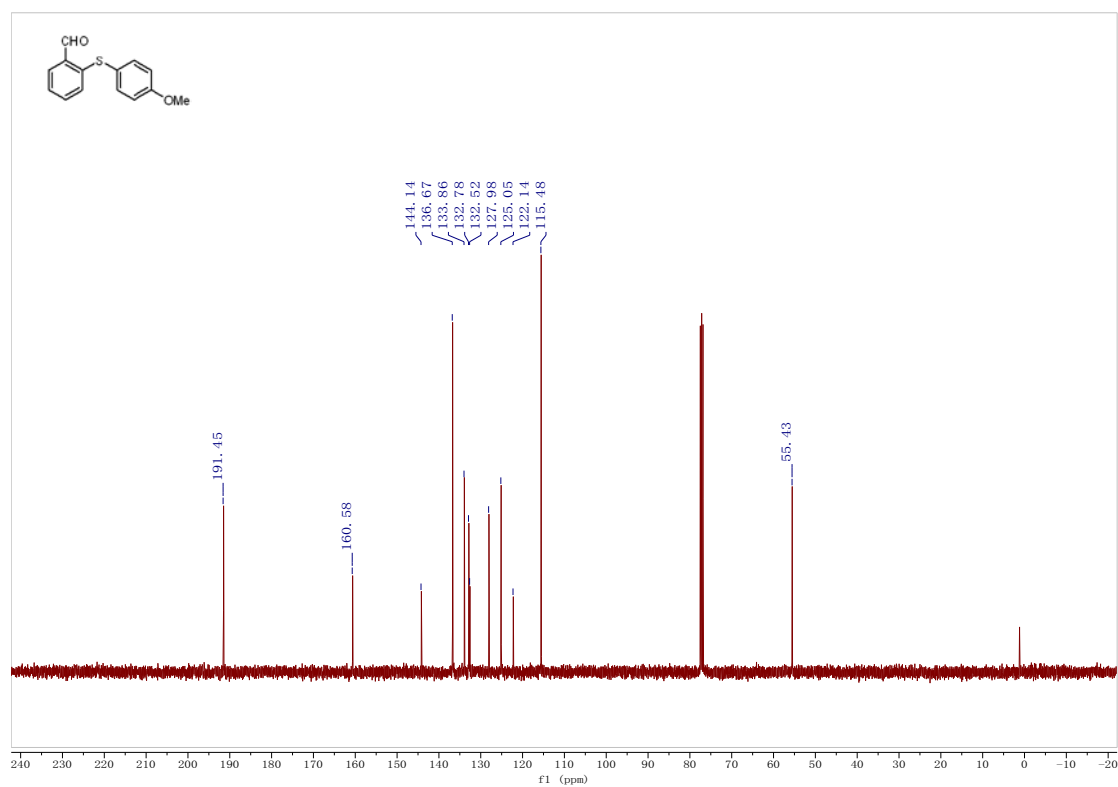

<sup>1</sup>H NMR Spectrum of **3t** (400 MHz, CDCl<sub>3</sub>)

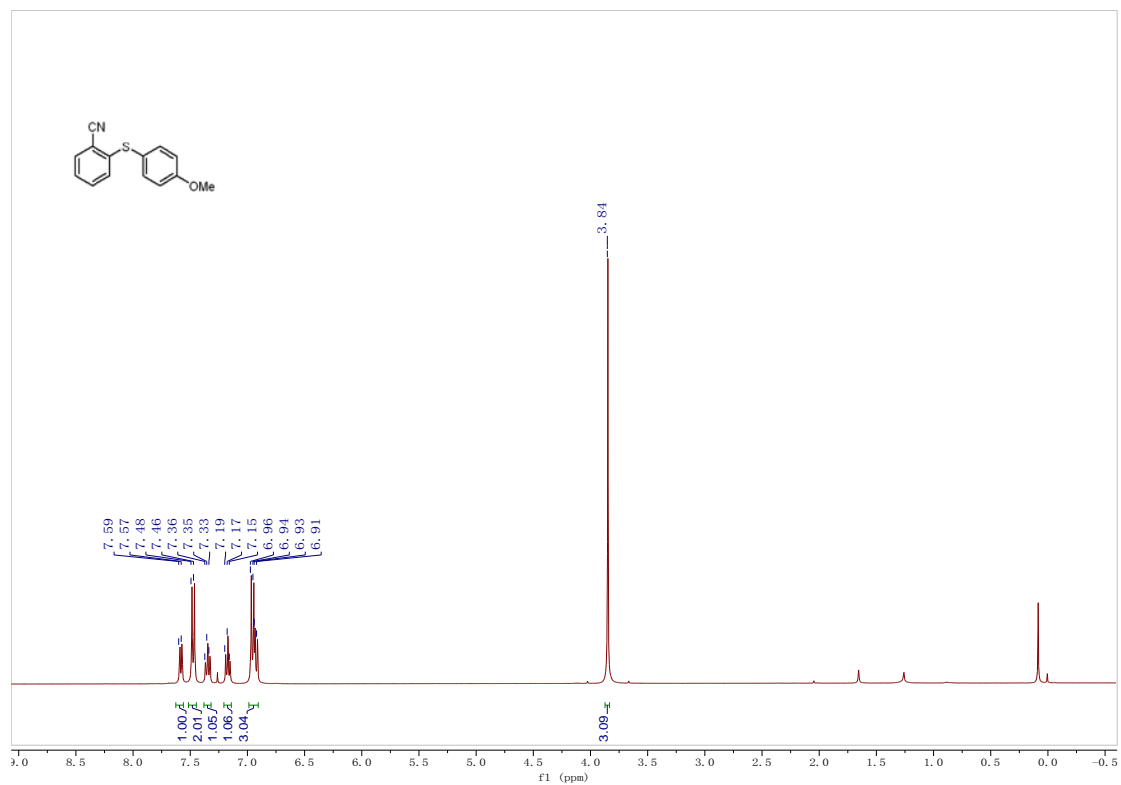

<sup>13</sup>C NMR Spectrum of **3t** (101 MHz, CDCl<sub>3</sub>)

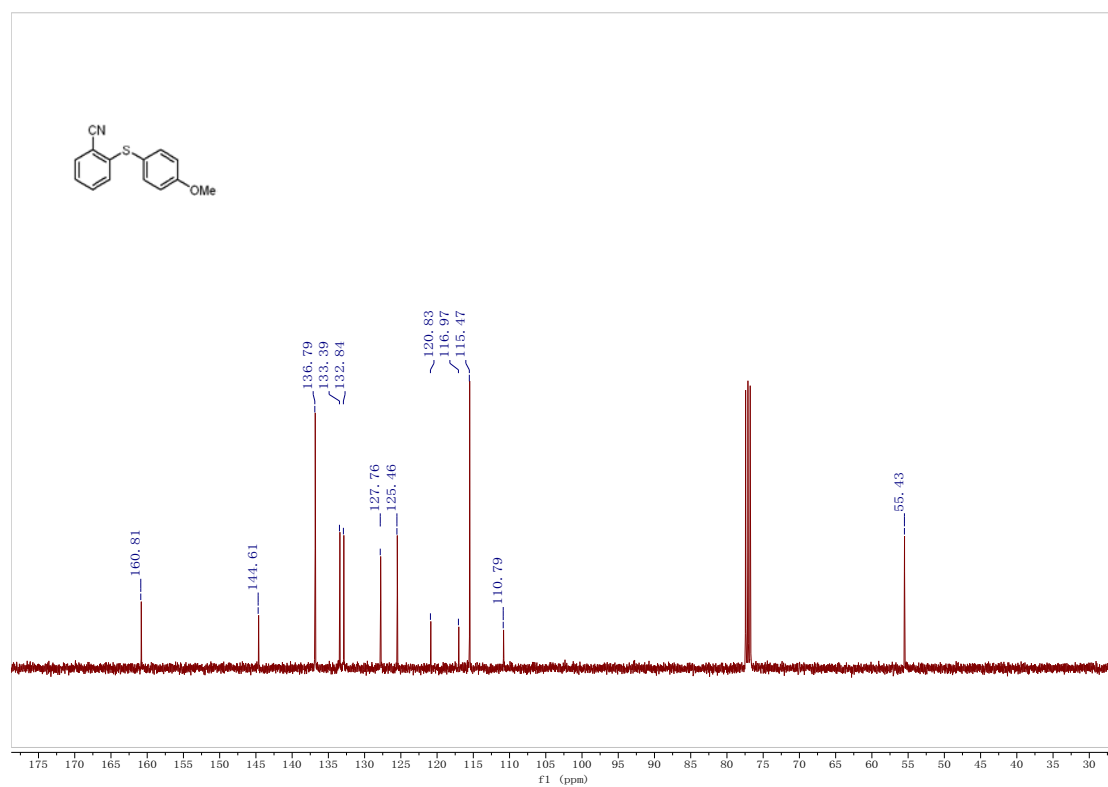

<sup>1</sup>H NMR Spectrum of **3u** (400 MHz, CDCl<sub>3</sub>)

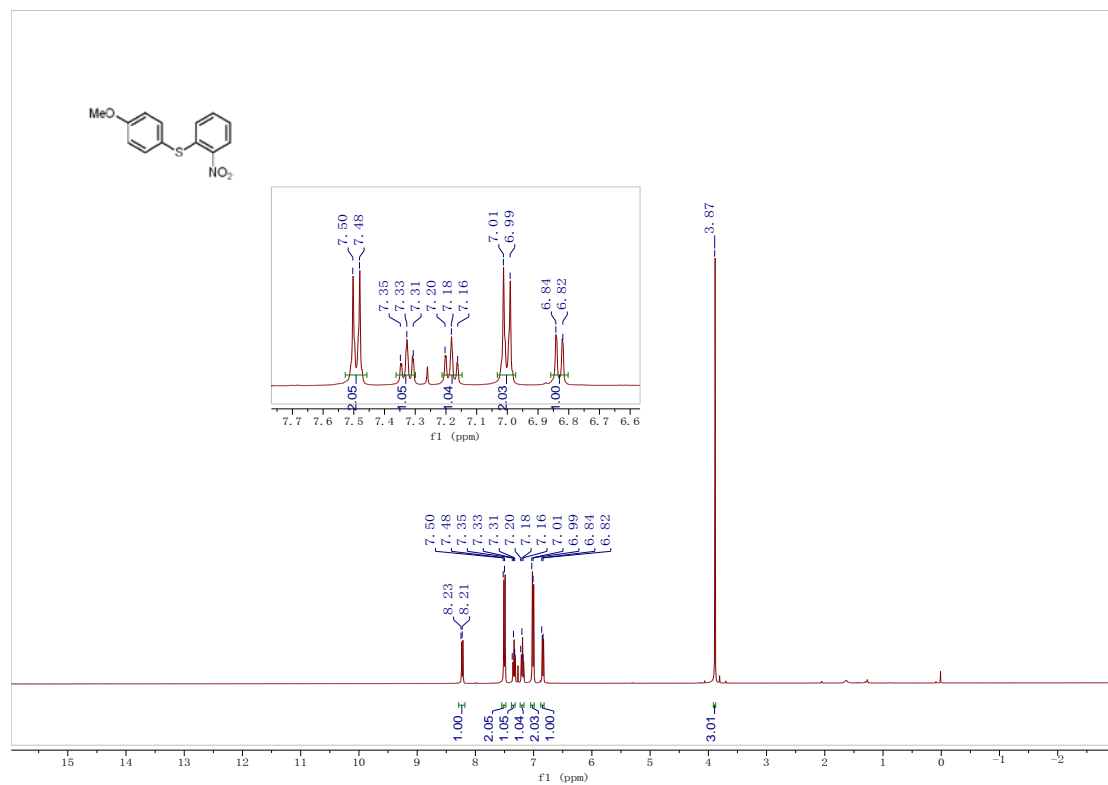

<sup>13</sup>C NMR Spectrum of **3u** (101 MHz, CDCl<sub>3</sub>)

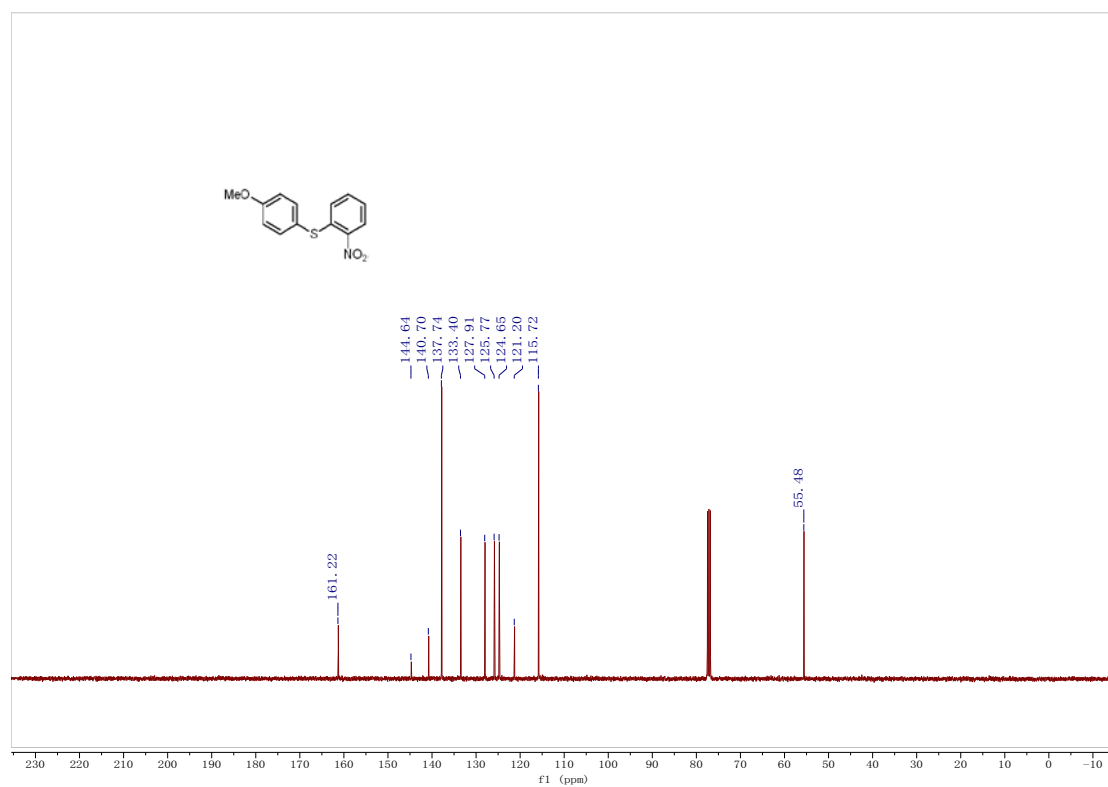



<sup>1</sup>H NMR Spectrum of **3v** (500 MHz, CDCl<sub>3</sub>)

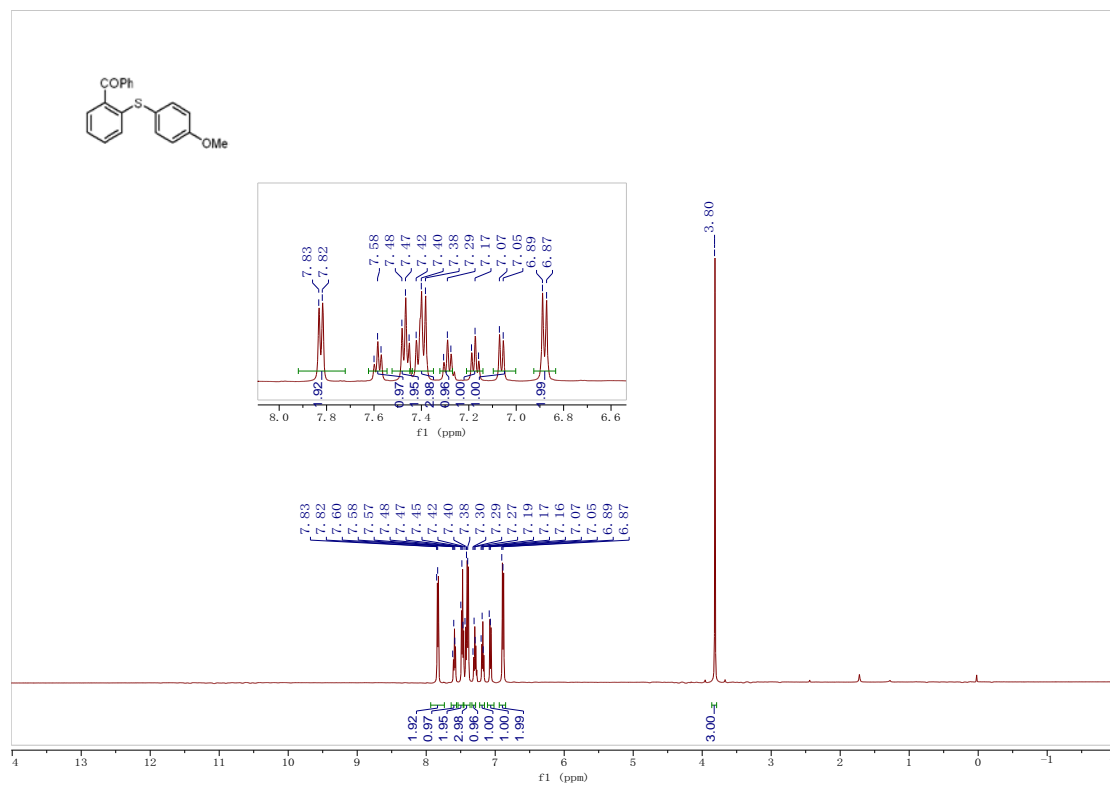

<sup>13</sup>C NMR Spectrum of **3v** (126 MHz, CDCl<sub>3</sub>)

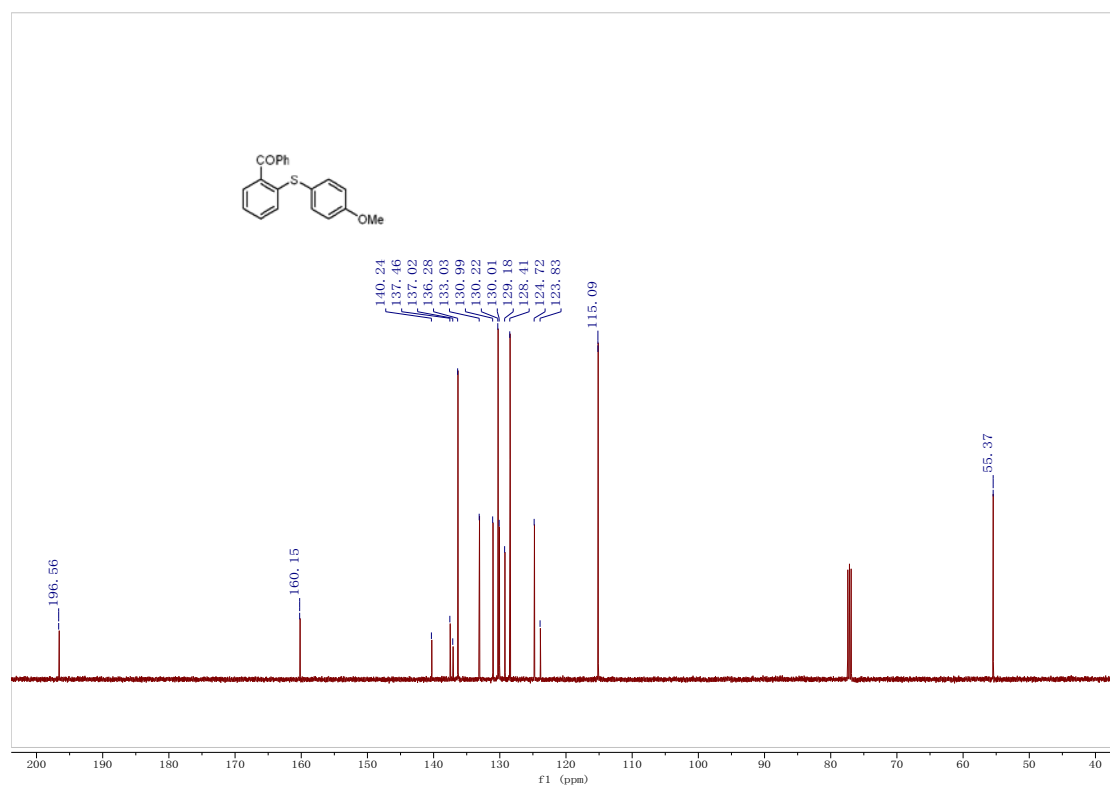

<sup>1</sup>H NMR Spectrum of **3w** (500 MHz, CDCl<sub>3</sub>)

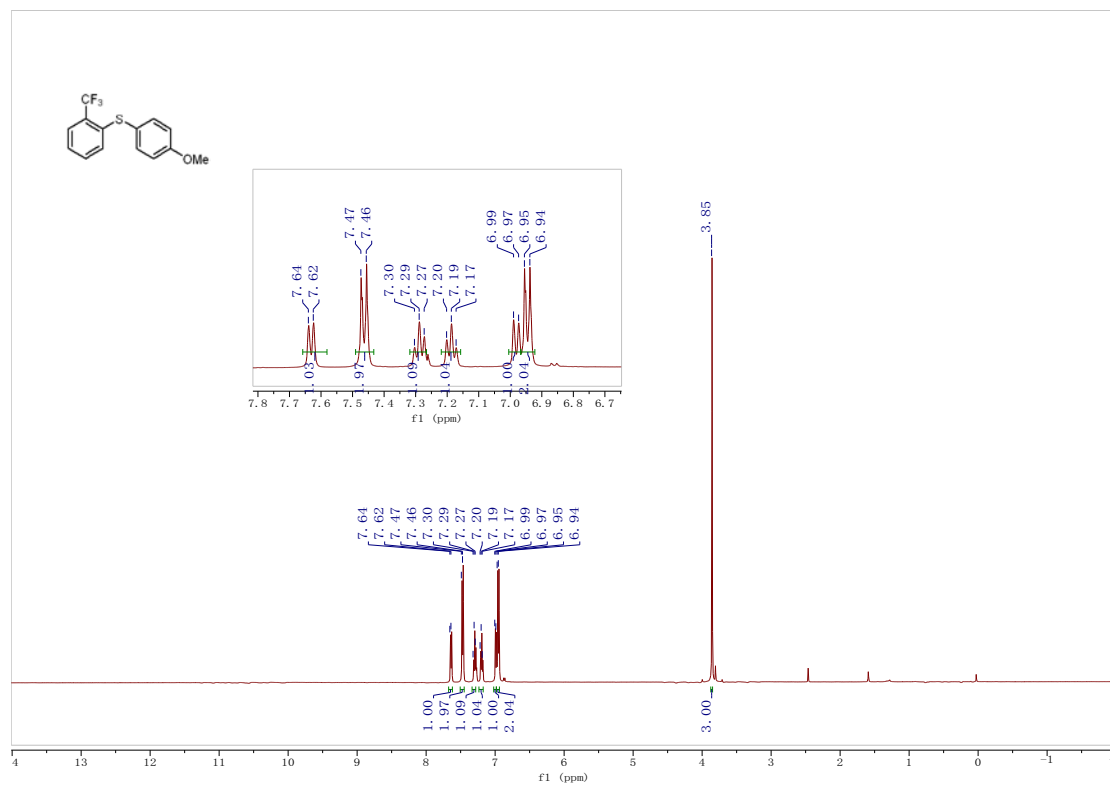

<sup>13</sup>C NMR Spectrum of **3w** (126 MHz, CDCl<sub>3</sub>)

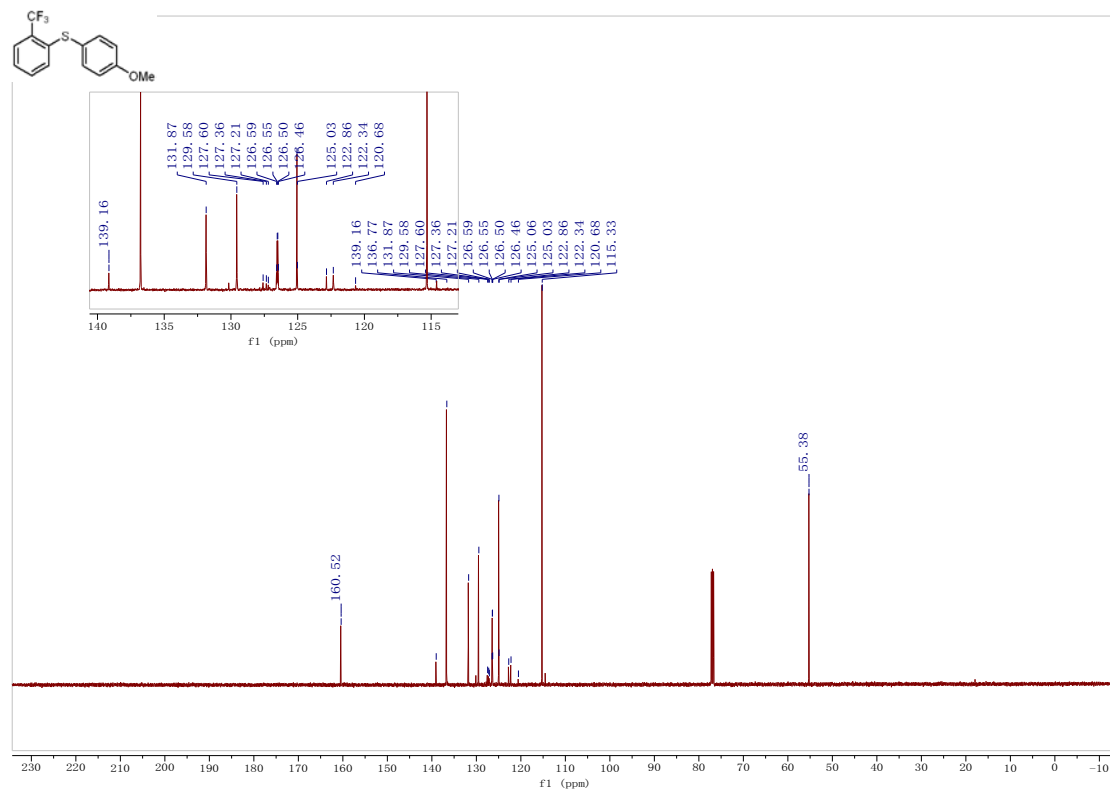

<sup>19</sup>F NMR Spectrum of **3w** (376 MHz, CDCl<sub>3</sub>)

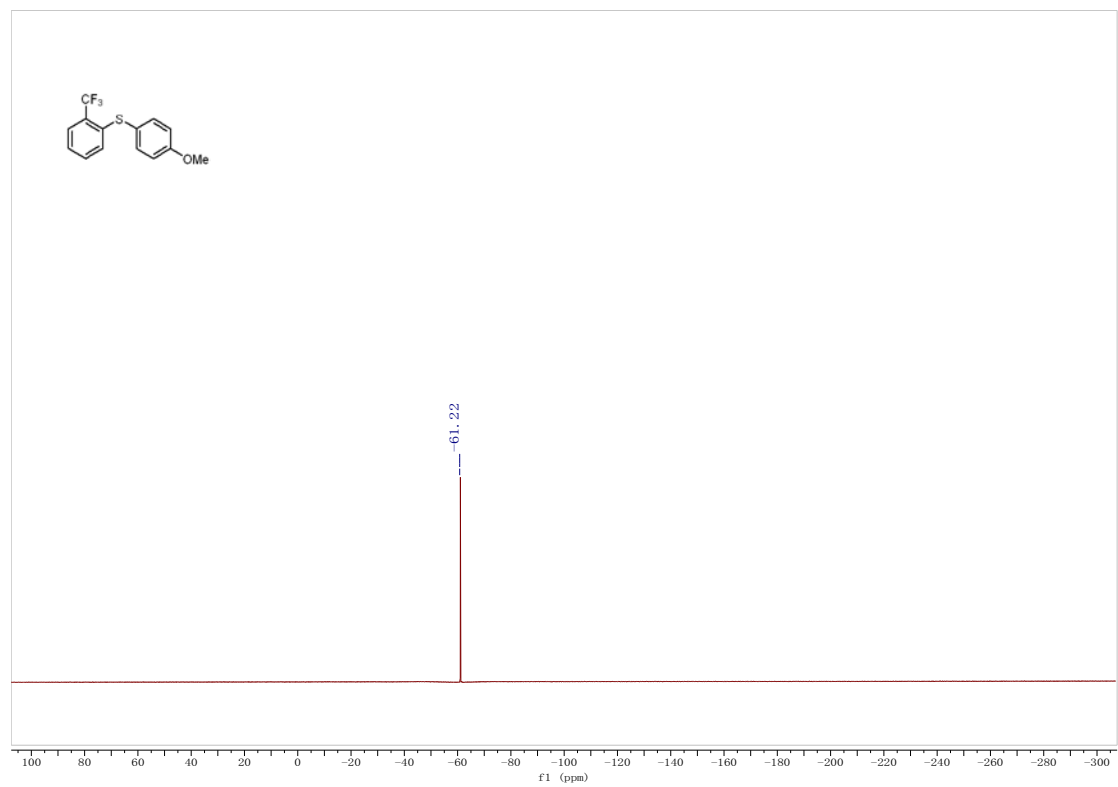

<sup>1</sup>H NMR Spectrum of **3x** (400 MHz, CDCl<sub>3</sub>)

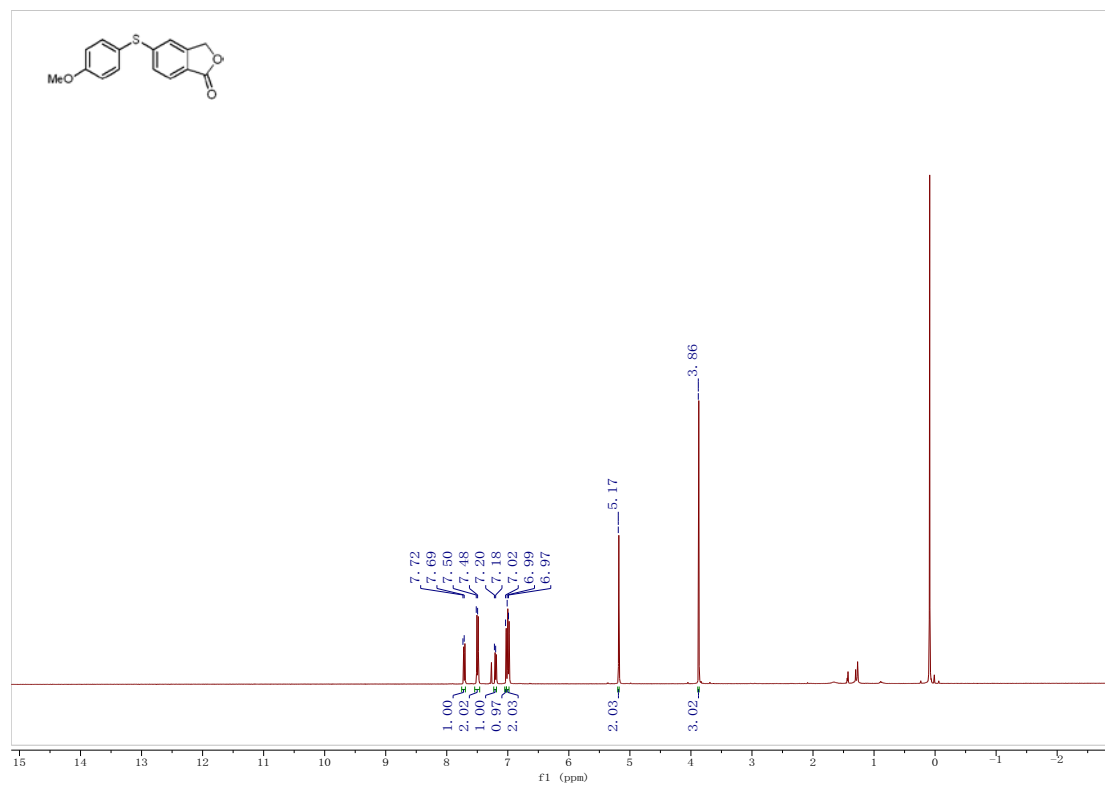

<sup>13</sup>C NMR Spectrum of **3x** (101 MHz, CDCl<sub>3</sub>)

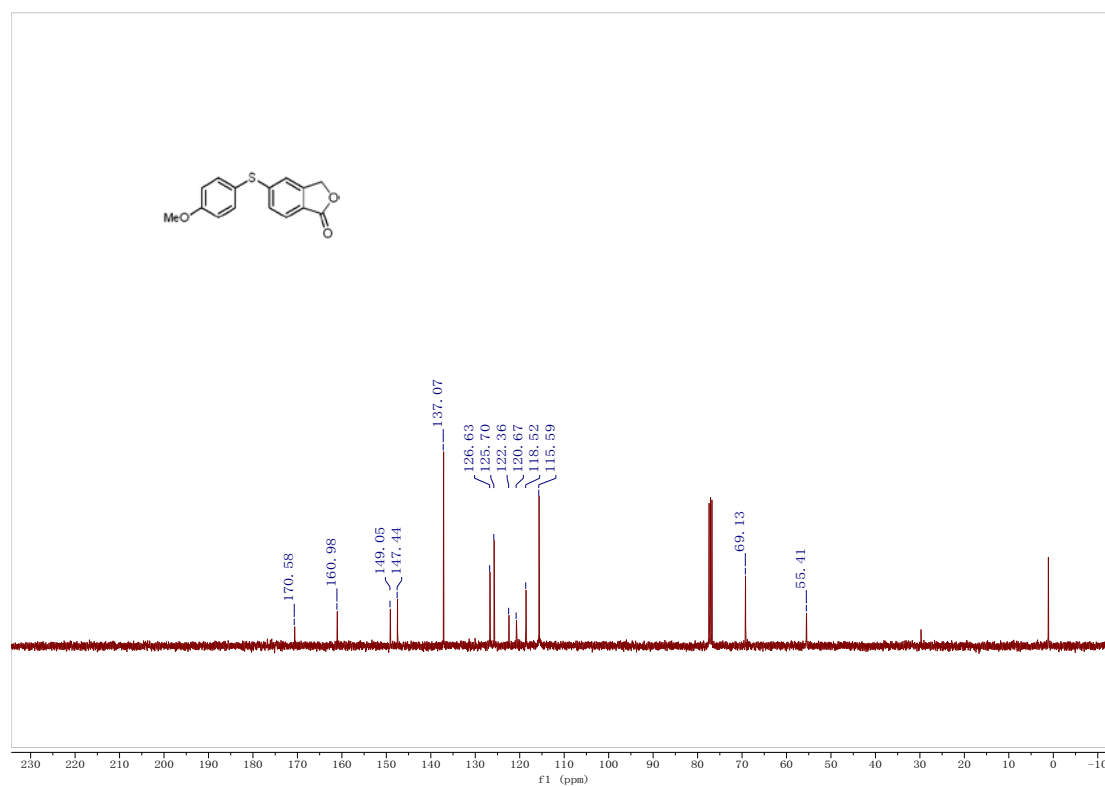

<sup>1</sup>H NMR Spectrum of **3y** (400 MHz, CDCl<sub>3</sub>)

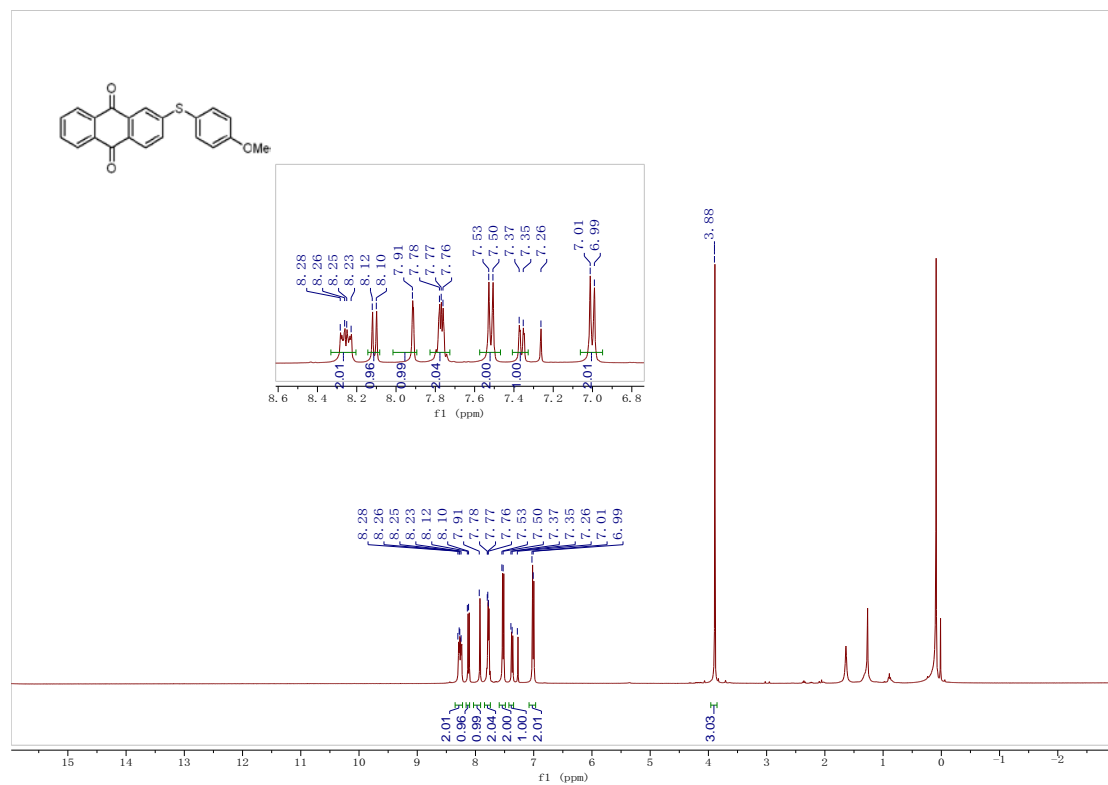

<sup>13</sup>C NMR Spectrum of **3y** (101 MHz, CDCl<sub>3</sub>)

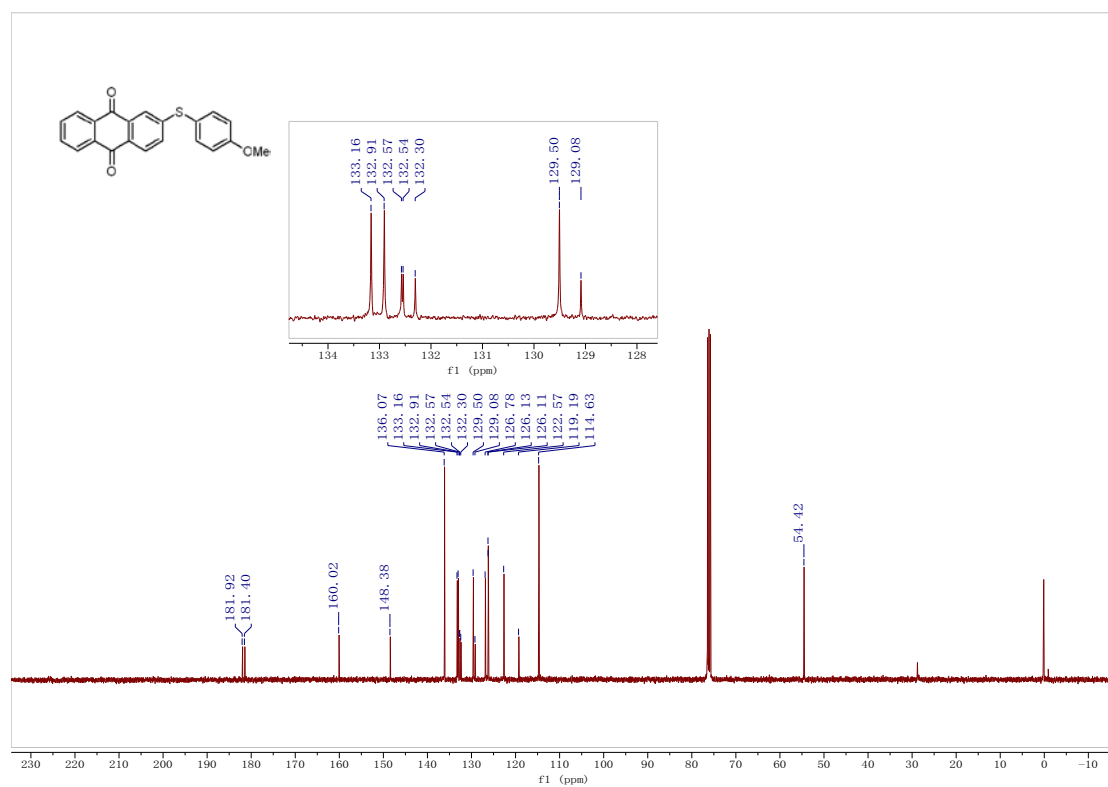

<sup>1</sup>H NMR Spectrum of **3z** (500 MHz, CDCl<sub>3</sub>)

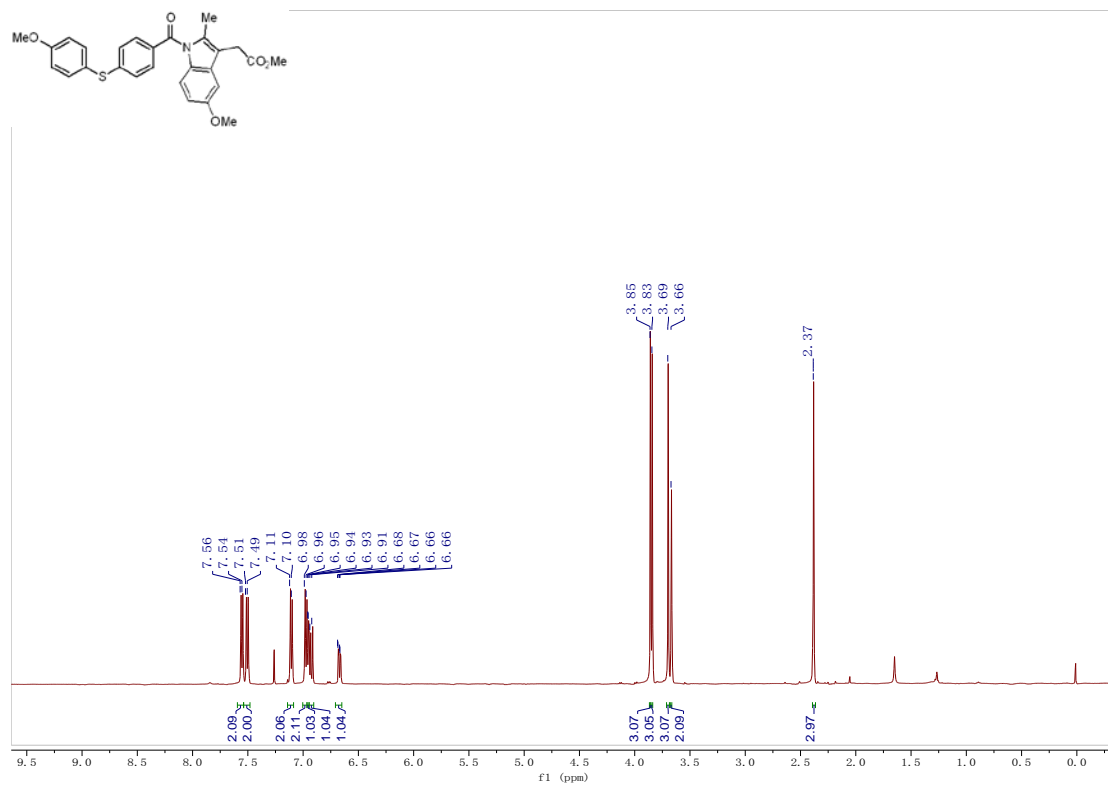

<sup>13</sup>C NMR Spectrum of **3z** (101 MHz, CDCl<sub>3</sub>)

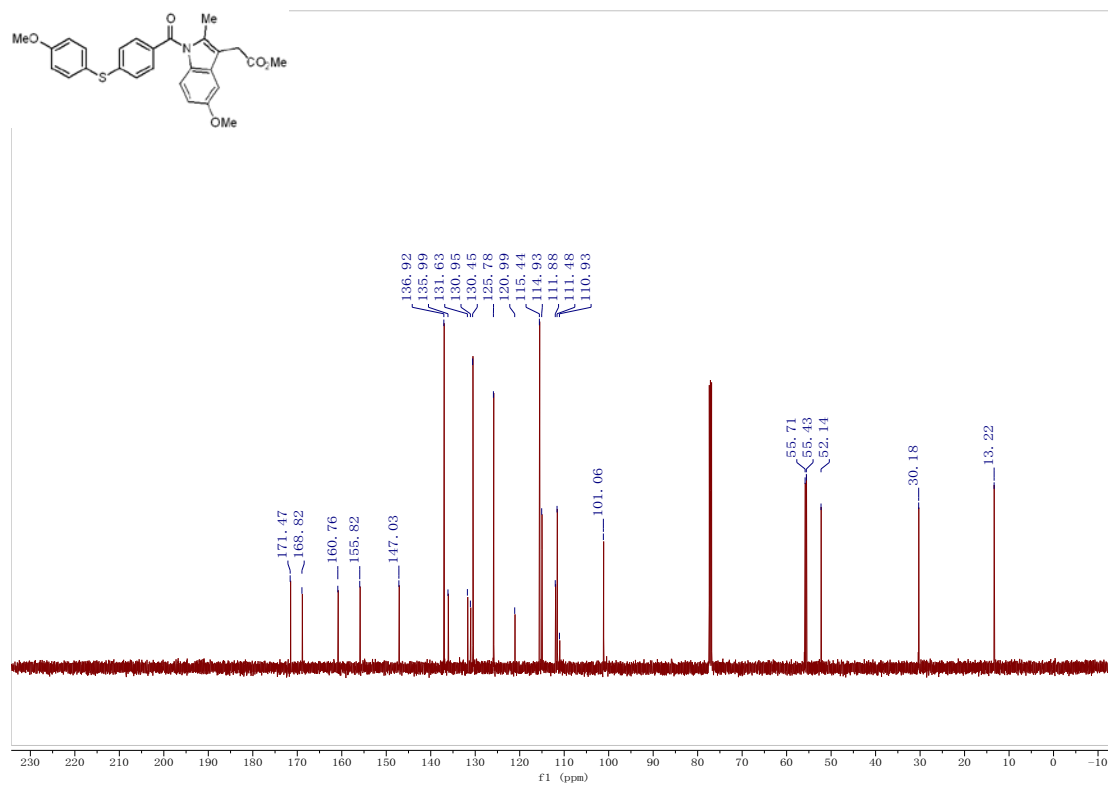

<sup>1</sup>H NMR Spectrum of **3aa** (400 MHz, CDCl<sub>3</sub>)

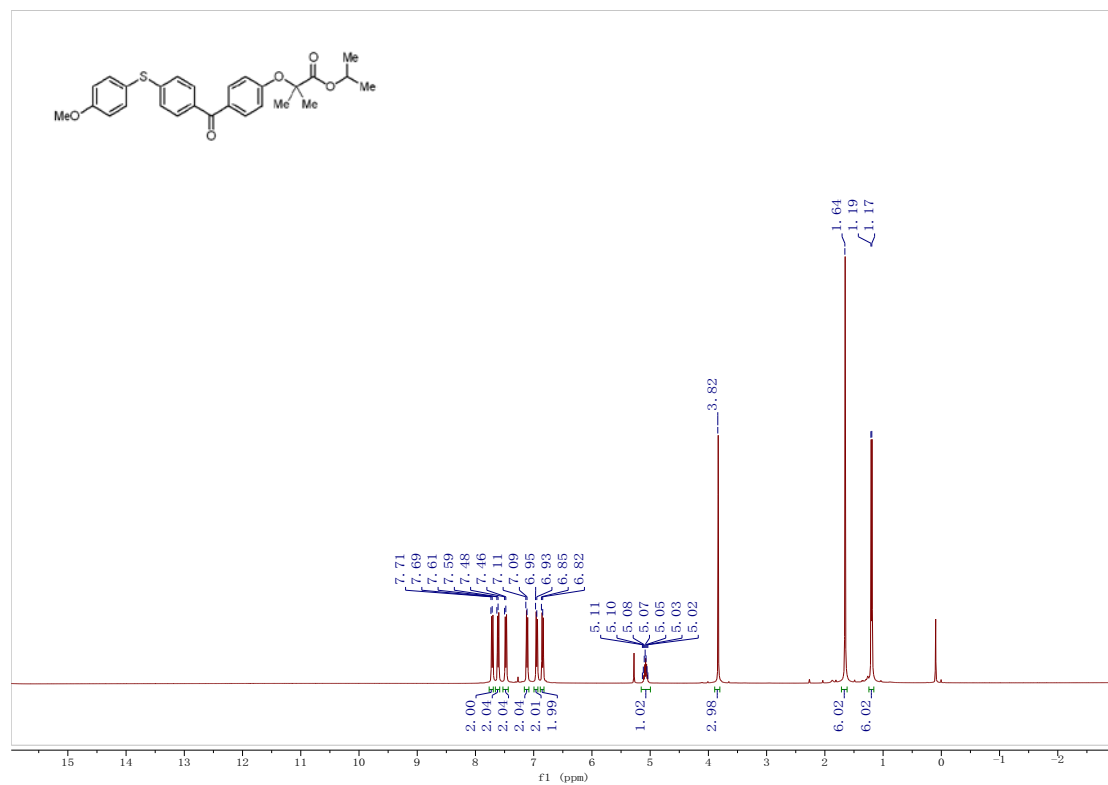

<sup>13</sup>C NMR Spectrum of **3aa** (101 MHz, CDCl<sub>3</sub>)

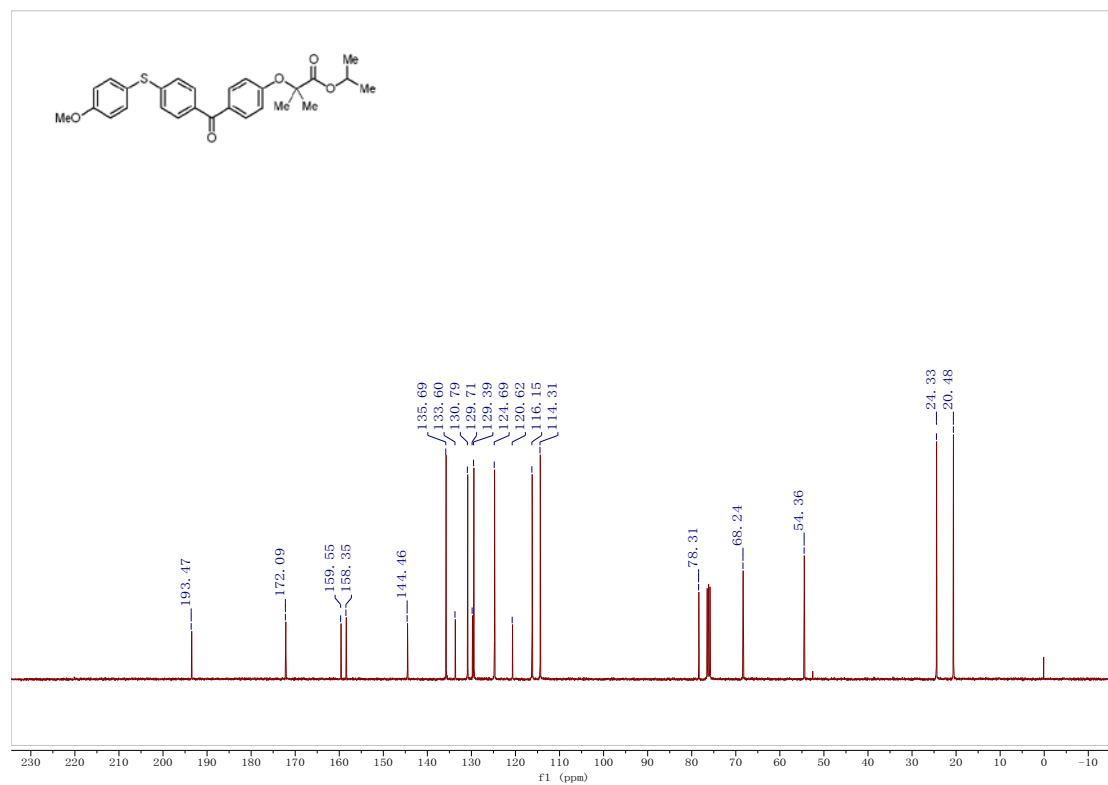

<sup>1</sup>H NMR Spectrum of **3ab** (500 MHz, DMSO-*d*<sub>6</sub>)

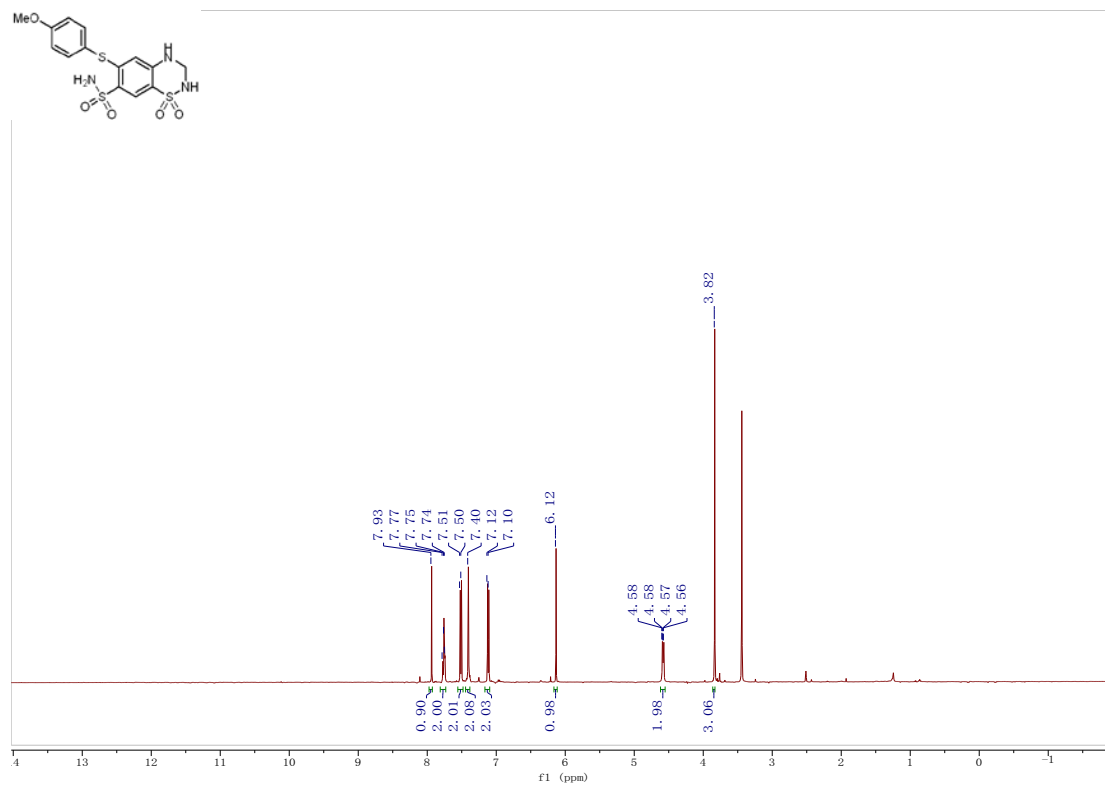

<sup>13</sup>C NMR Spectrum of **3ab** (101 MHz, DMSO-*d*<sub>6</sub>)

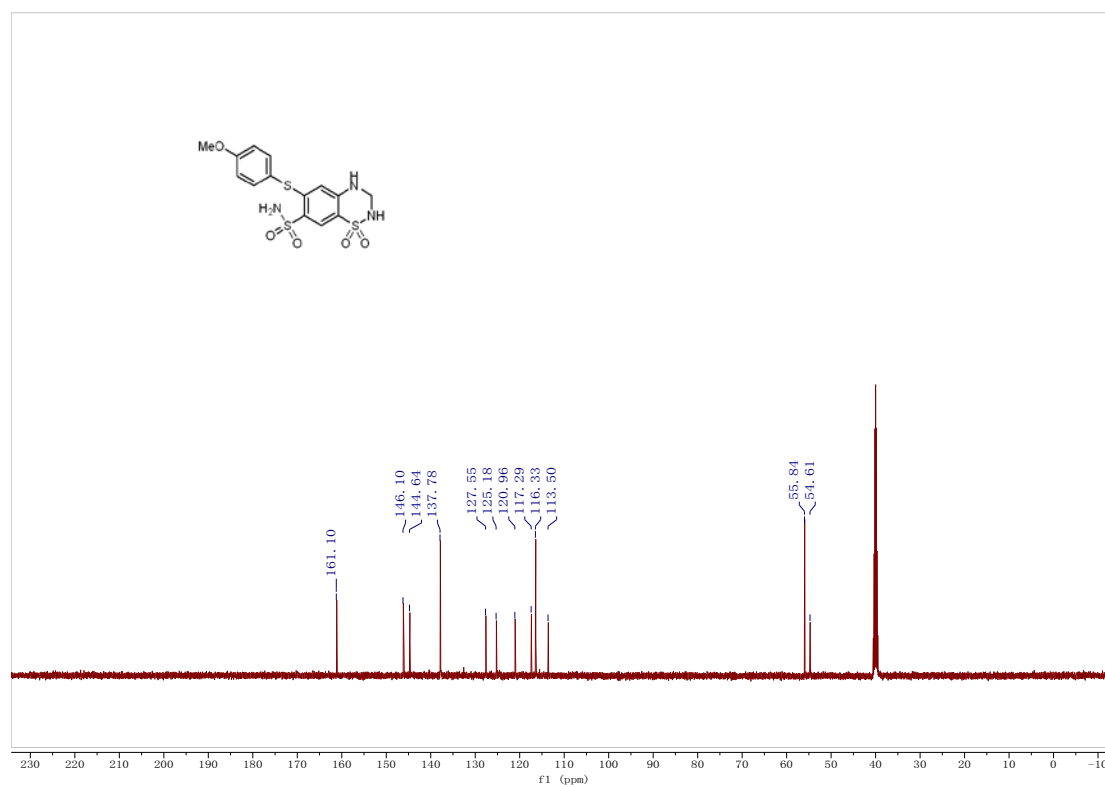



<sup>1</sup>H NMR Spectrum of **3ac** (400 MHz, CDCl<sub>3</sub>)

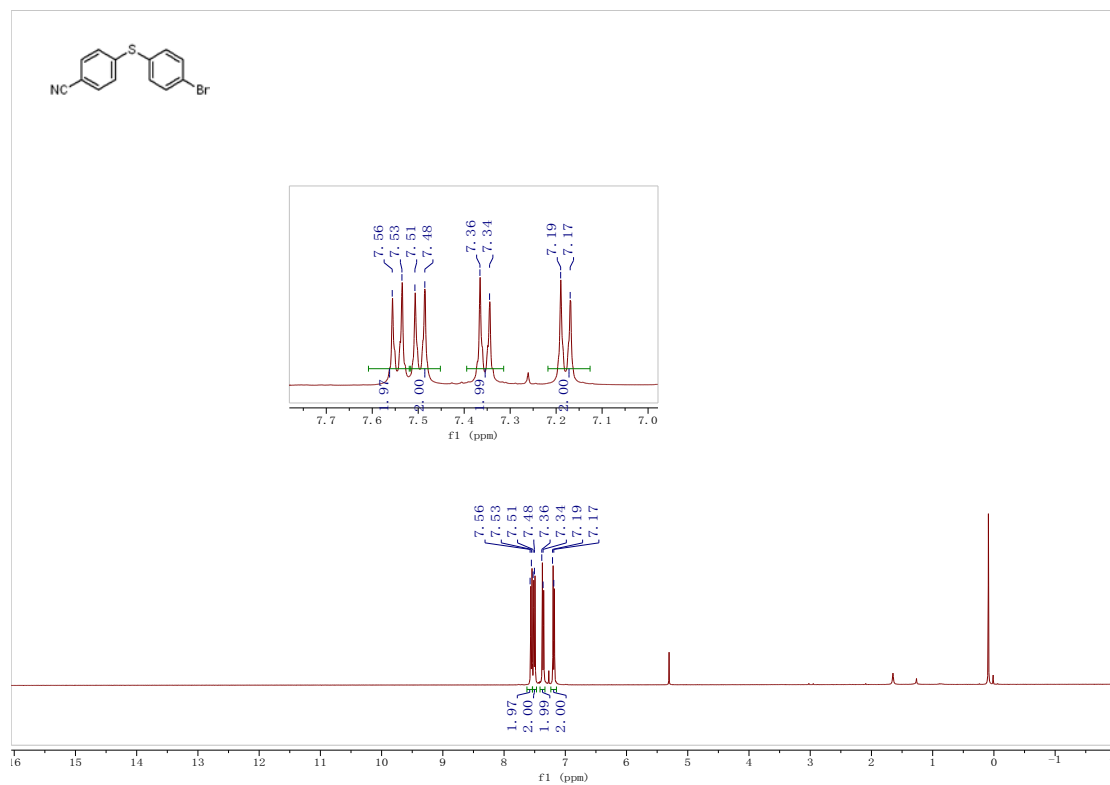

<sup>13</sup>C NMR Spectrum of **3ac** (101 MHz, CDCl<sub>3</sub>)

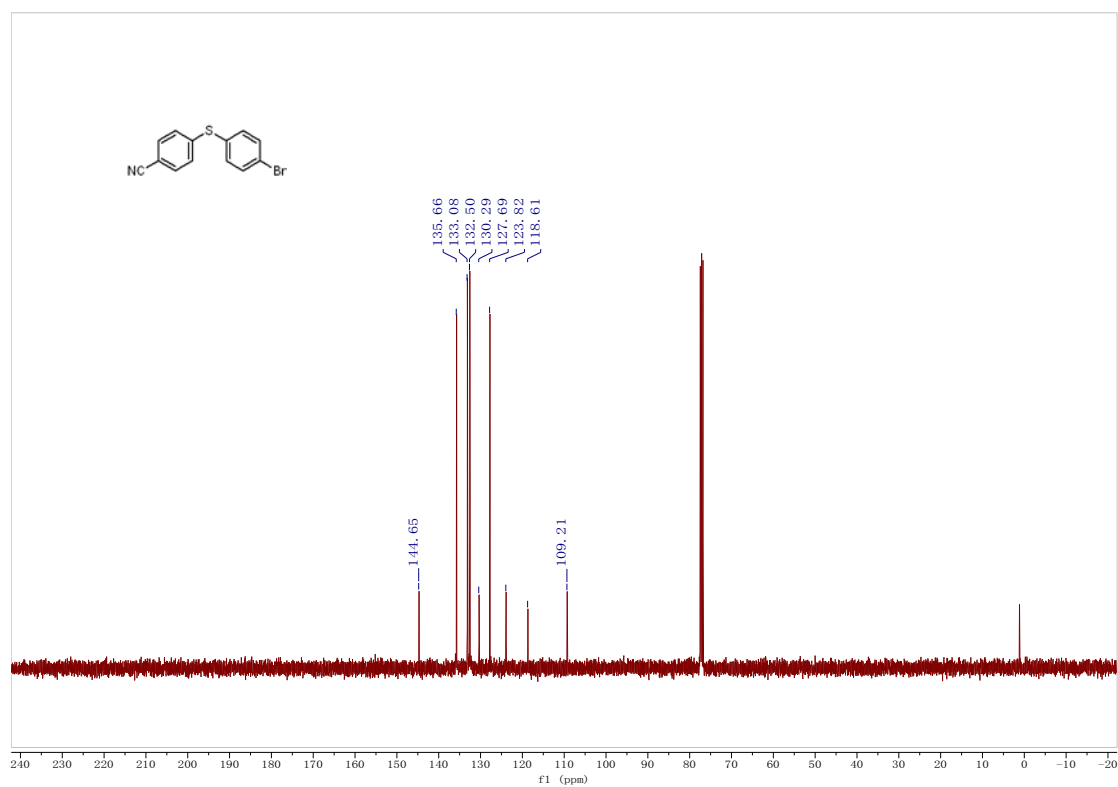

$^1\text{H}$  NMR Spectrum of **3ad** (400 MHz,  $\text{CDCl}_3$ )

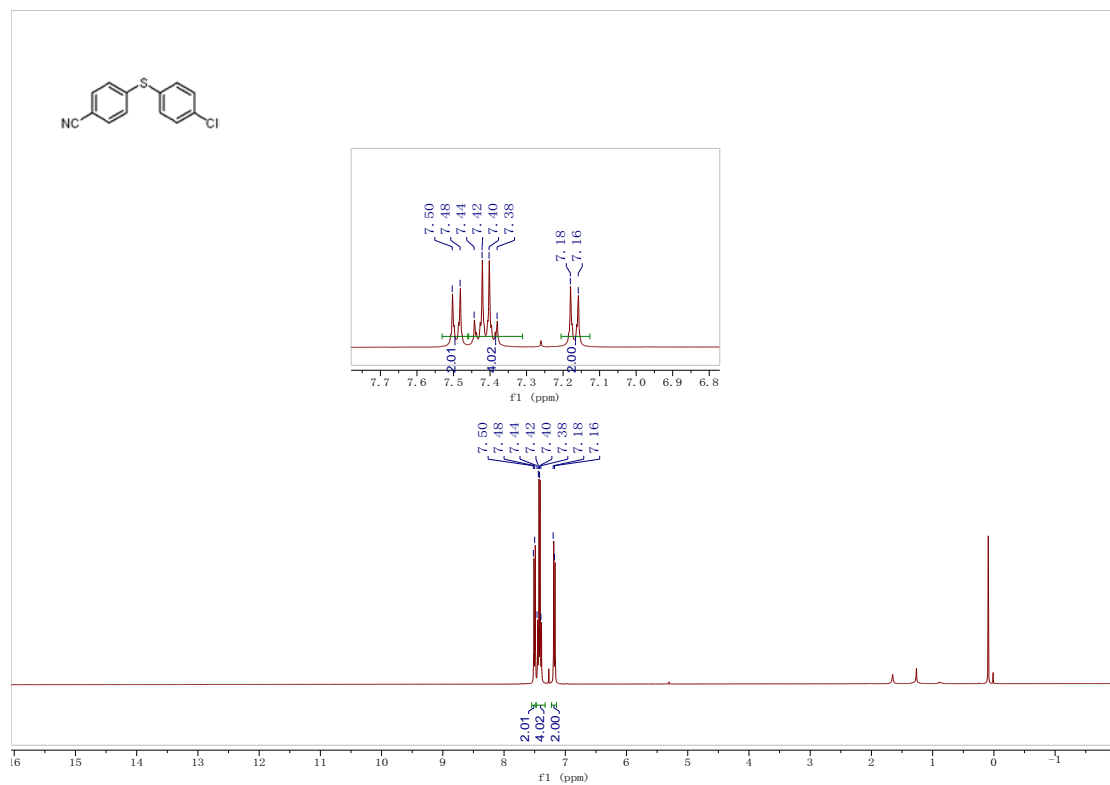

$^{13}\text{C}$  NMR Spectrum of **3ad** (101 MHz,  $\text{CDCl}_3$ )

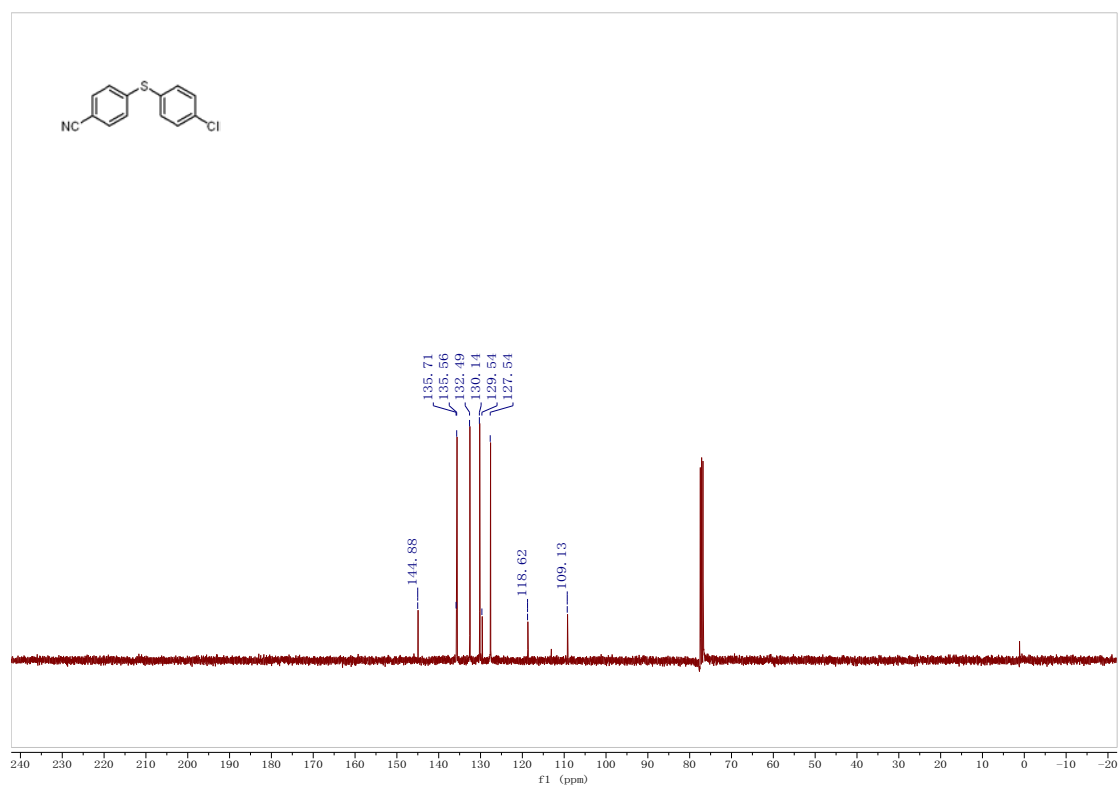

<sup>1</sup>H NMR Spectrum of **3ae** (400 MHz, CDCl<sub>3</sub>)

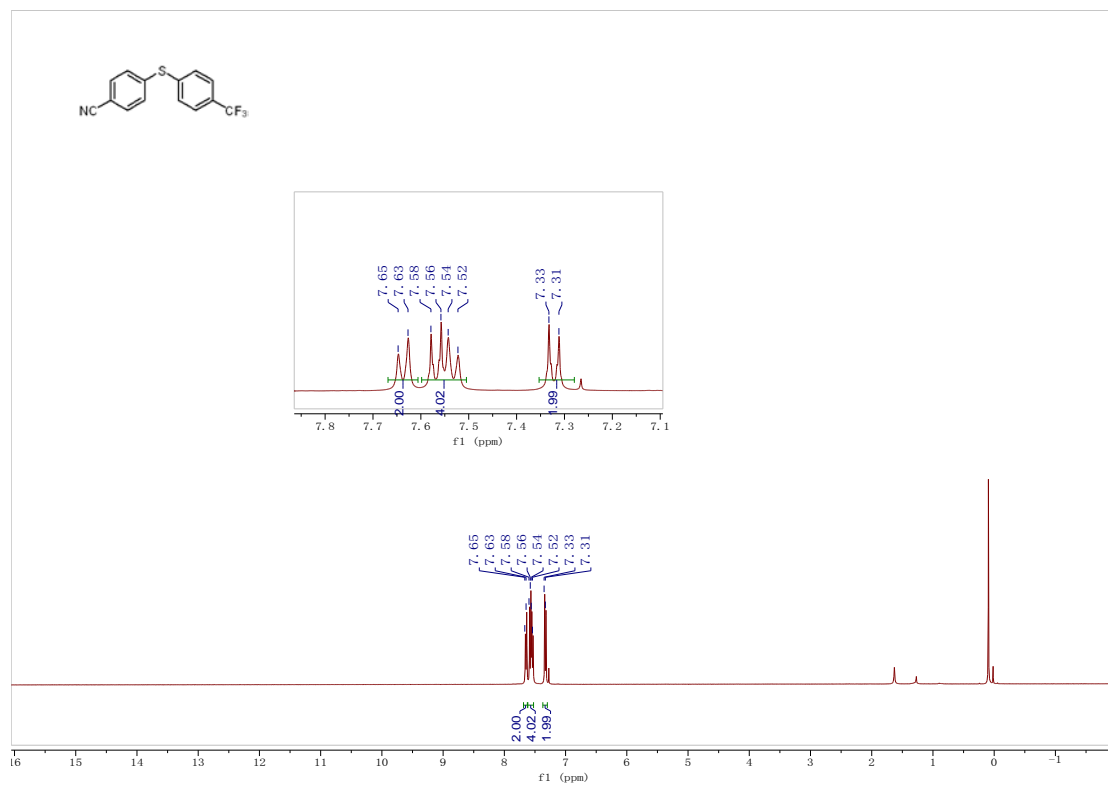

<sup>13</sup>C NMR Spectrum of **3ae** (101 MHz, CDCl<sub>3</sub>)

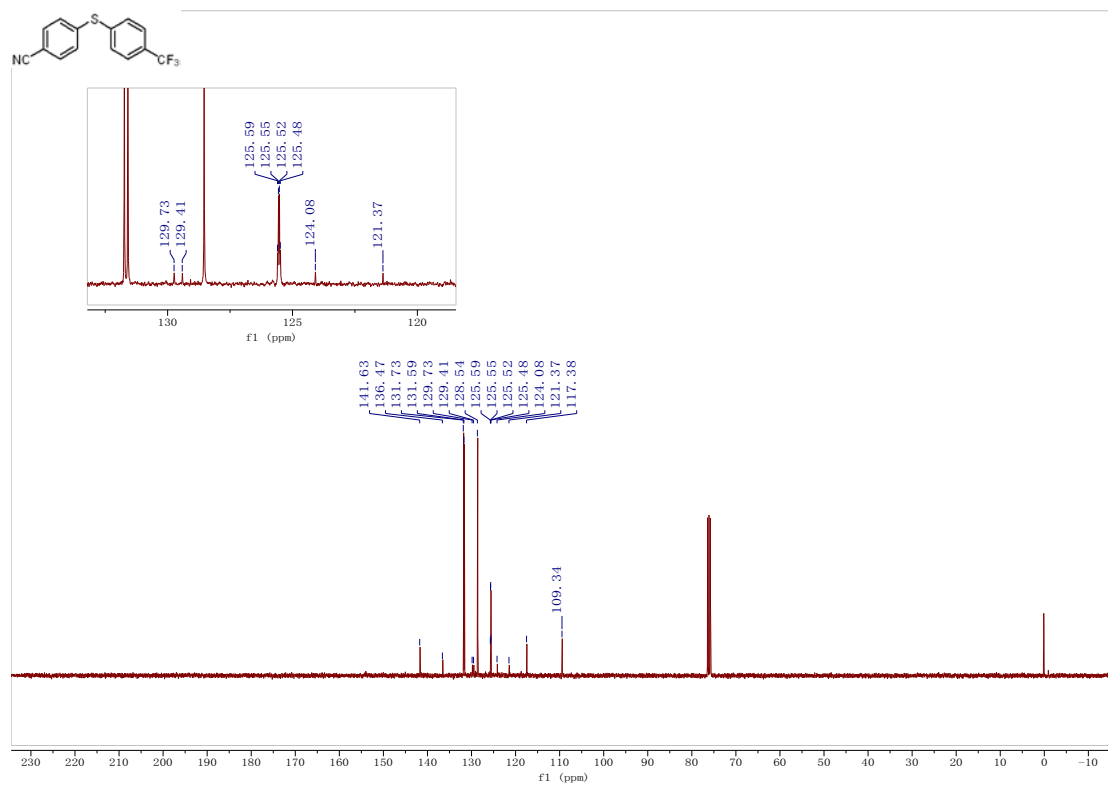

<sup>19</sup>F NMR Spectrum of **3ae** (376 MHz, CDCl<sub>3</sub>)

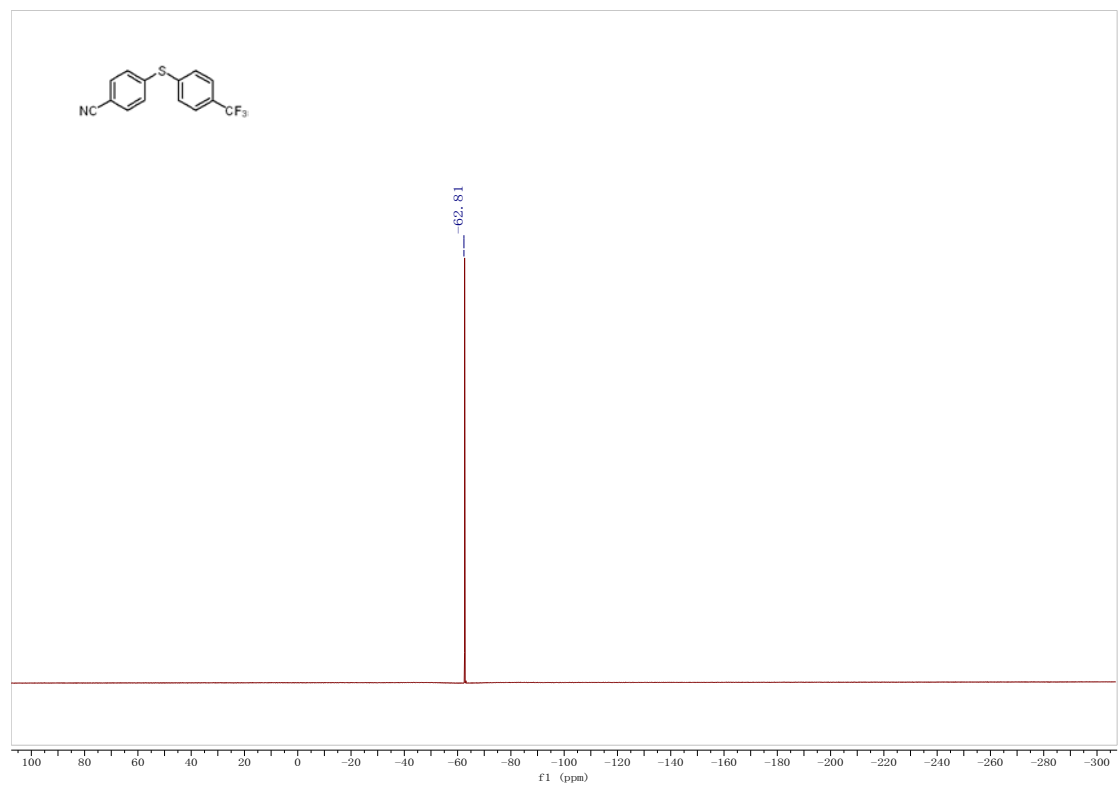

<sup>1</sup>H NMR Spectrum of **3af** (400 MHz, CDCl<sub>3</sub>)

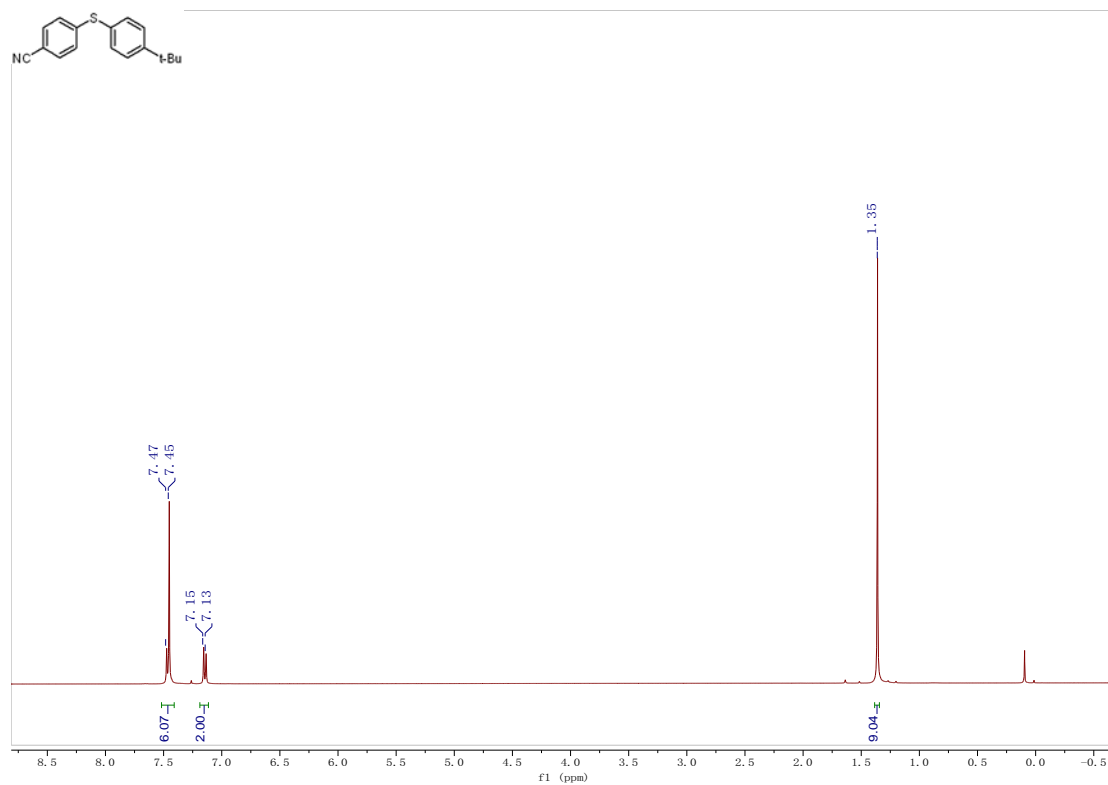

<sup>13</sup>C NMR Spectrum of **3af** (101 MHz, CDCl<sub>3</sub>)

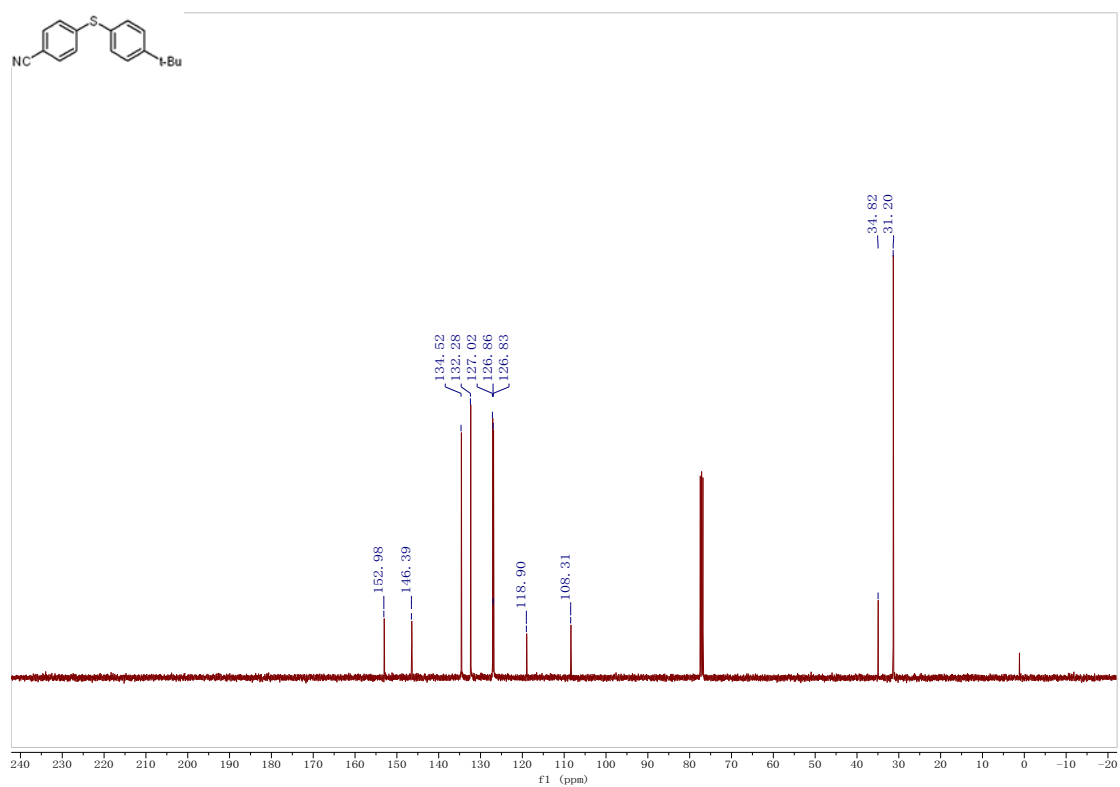

<sup>1</sup>H NMR Spectrum of **3ag** (400 MHz, CDCl<sub>3</sub>)

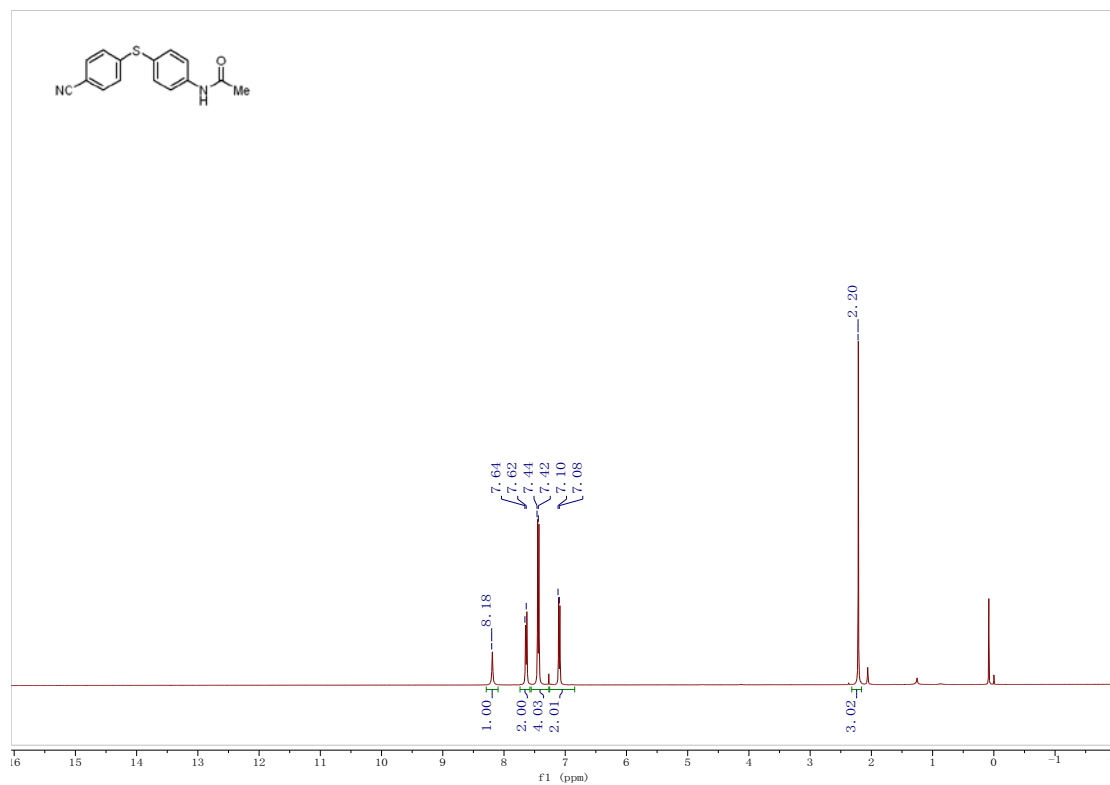

<sup>13</sup>C NMR Spectrum of **3ag** (101 MHz, CDCl<sub>3</sub>)

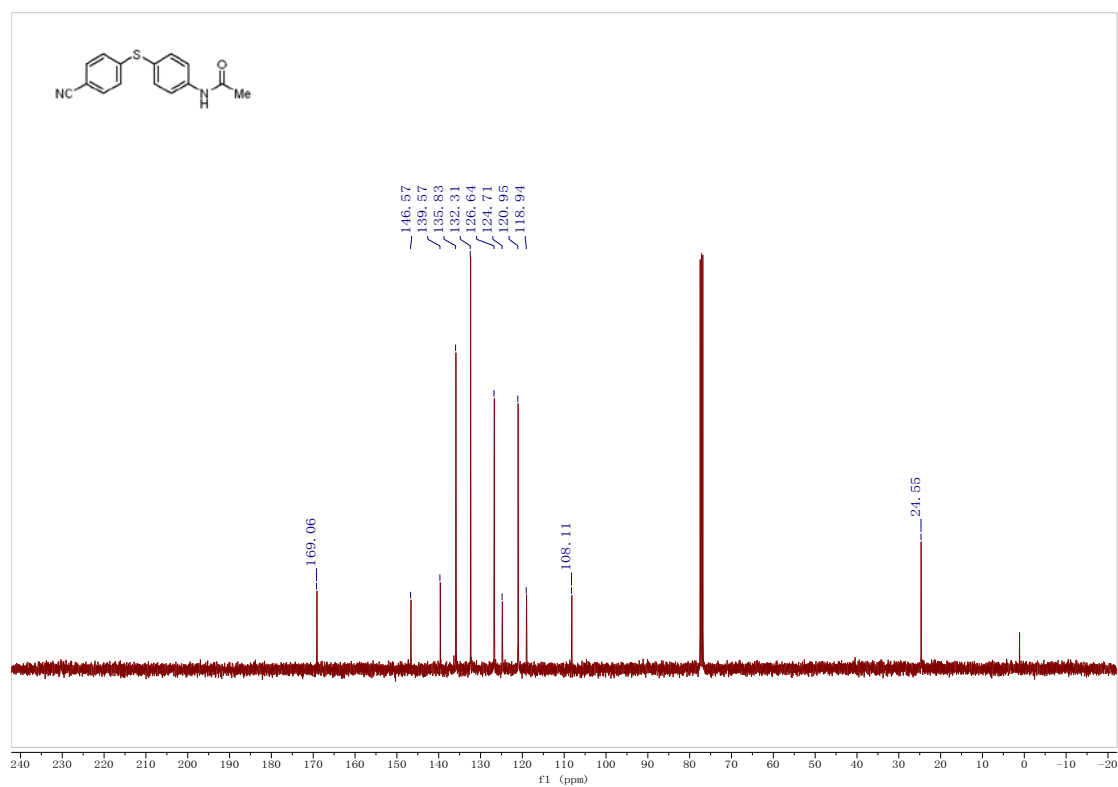

<sup>1</sup>H NMR Spectrum of **3ah** (400 MHz, CDCl<sub>3</sub>)

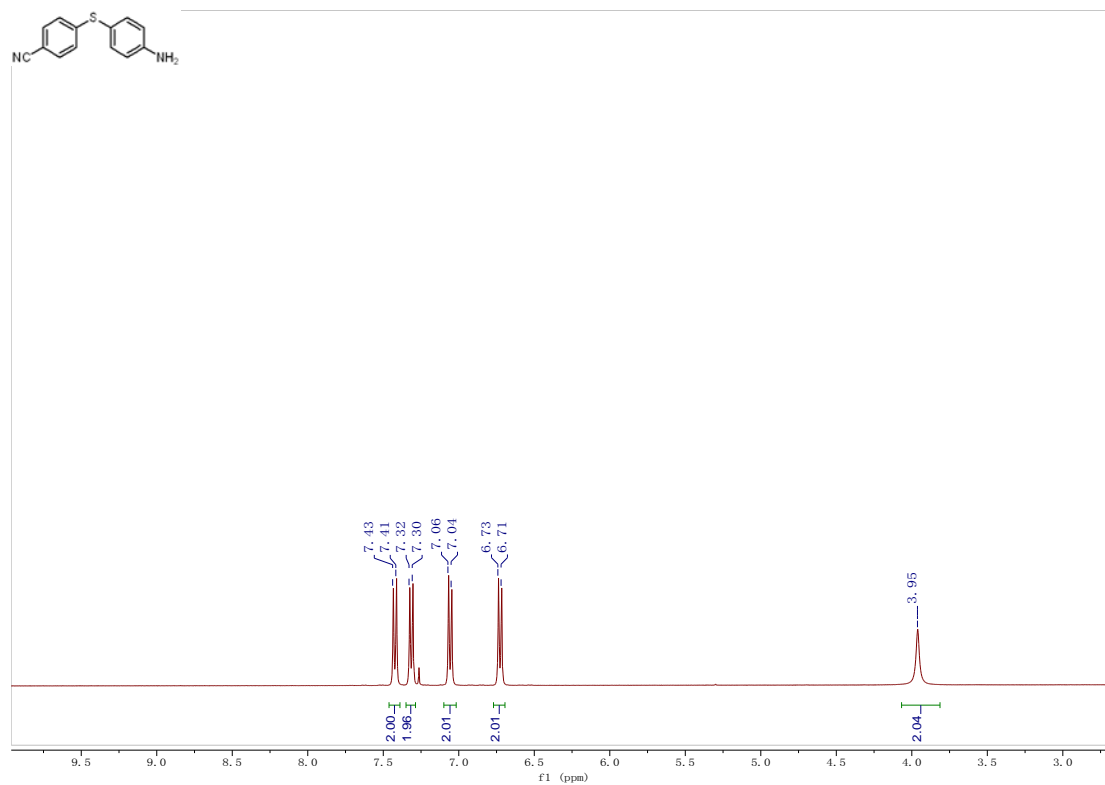

<sup>13</sup>C NMR Spectrum of **3ah** (101 MHz, CDCl<sub>3</sub>)

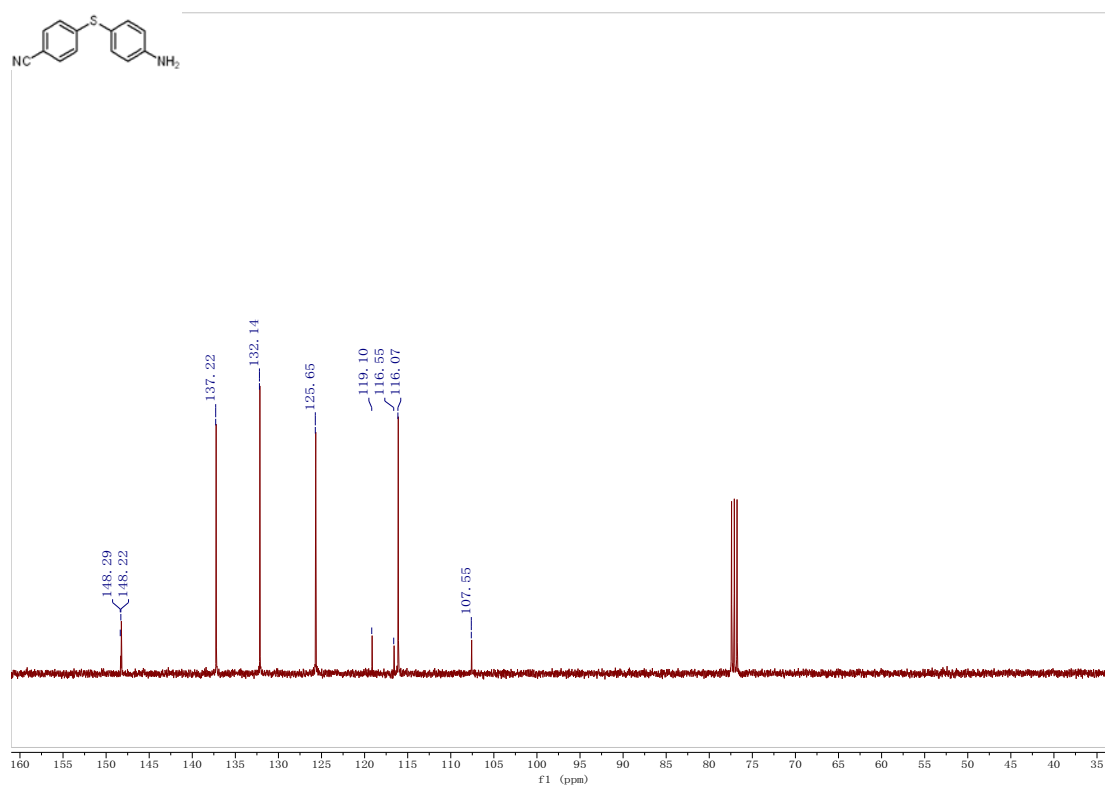

$^1\text{H}$  NMR Spectrum of **3ai** (400 MHz, DMSO- $d_6$ )

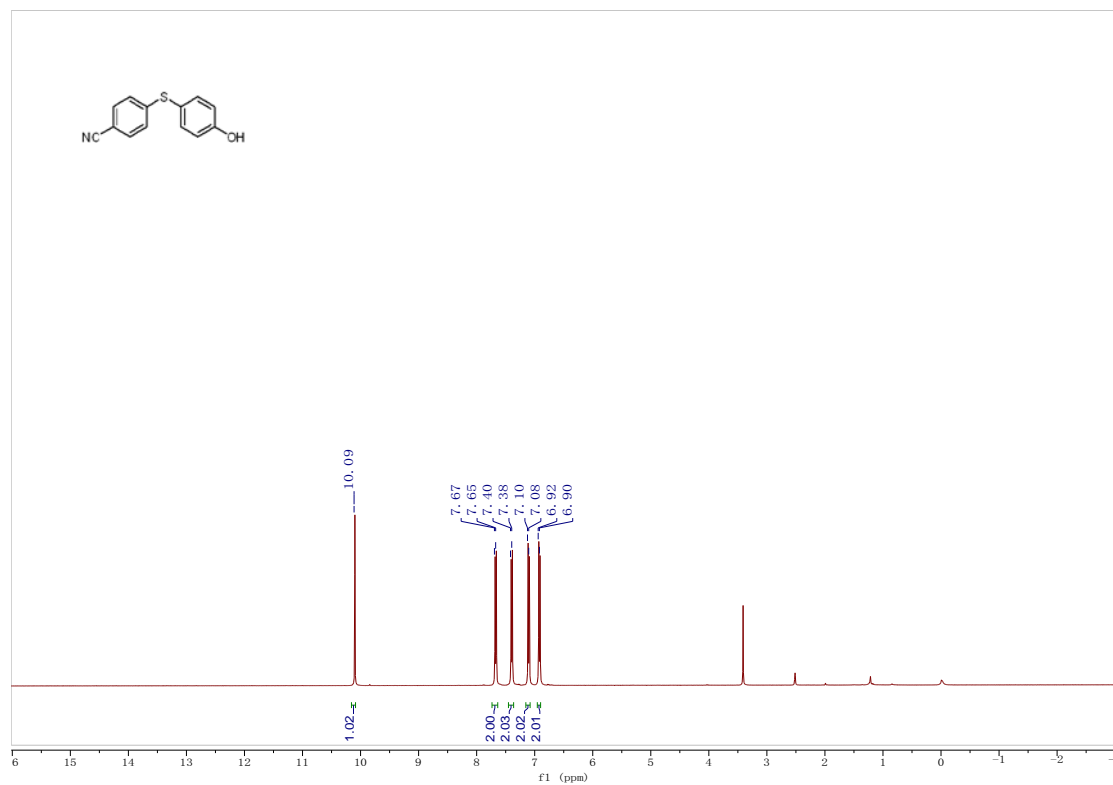

$^{13}\text{C}$  NMR Spectrum of **3ai** (101 MHz, DMSO- $d_6$ )

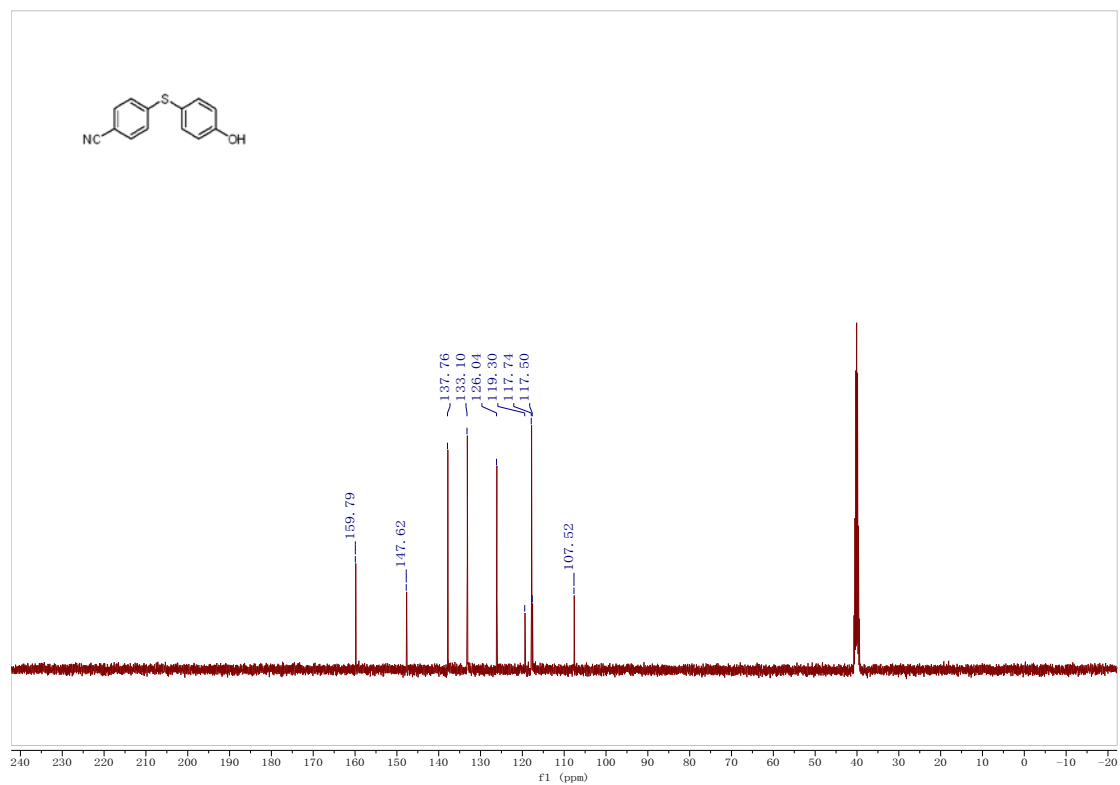



<sup>1</sup>H NMR Spectrum of **3aj** (400 MHz, CDCl<sub>3</sub>)

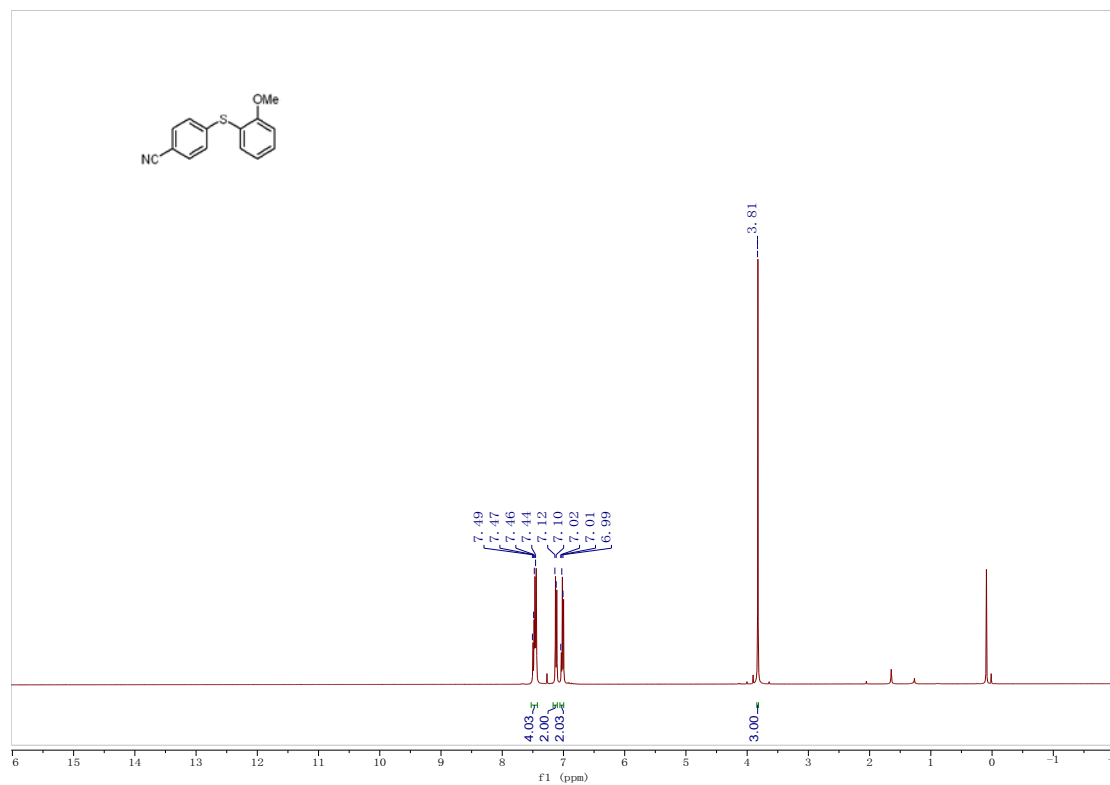

<sup>13</sup>C NMR Spectrum of **3aj** (101 MHz, CDCl<sub>3</sub>)

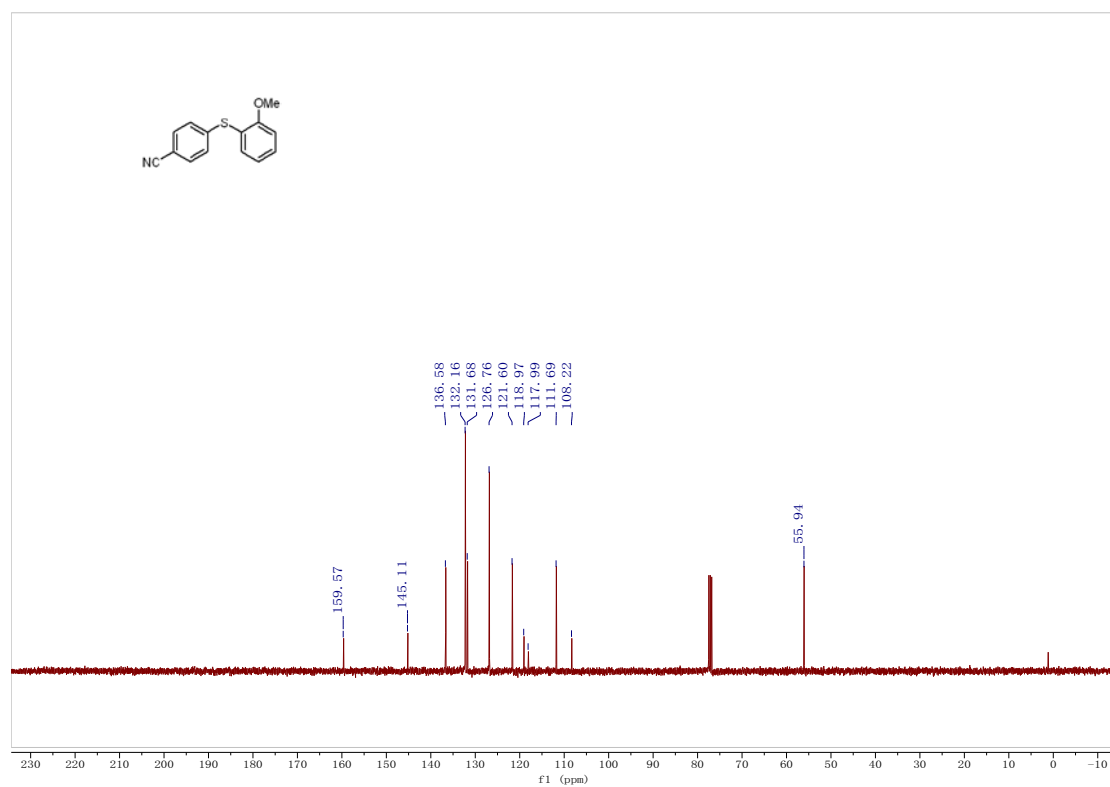

<sup>1</sup>H NMR Spectrum of **3ak** (400 MHz, CDCl<sub>3</sub>)

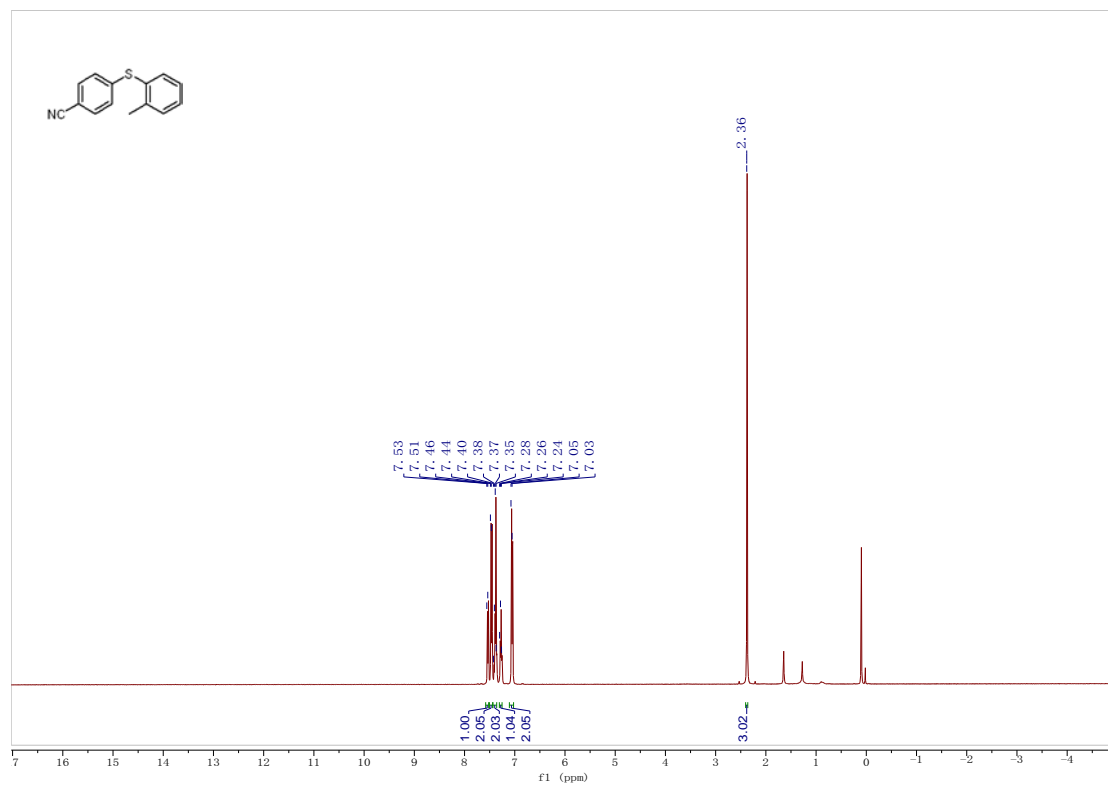

<sup>13</sup>C NMR Spectrum of **3ak** (101 MHz, CDCl<sub>3</sub>)

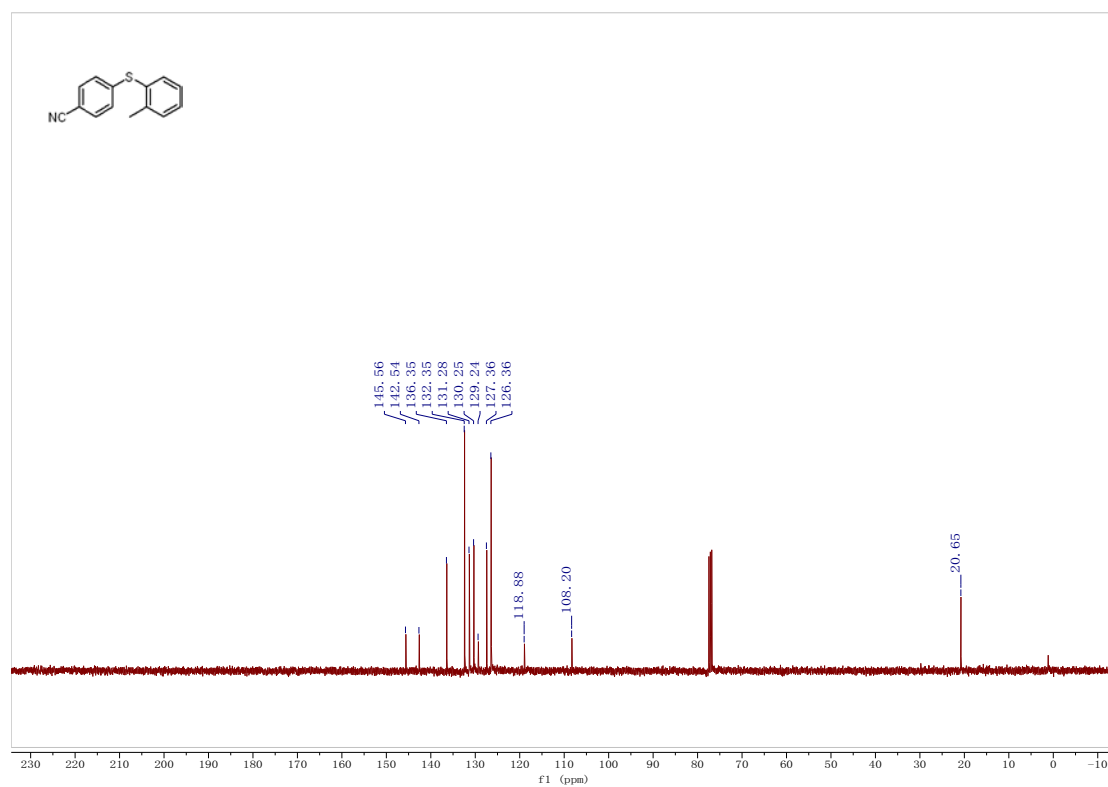

<sup>1</sup>H NMR Spectrum of **3al** (376 MHz, CDCl<sub>3</sub>)

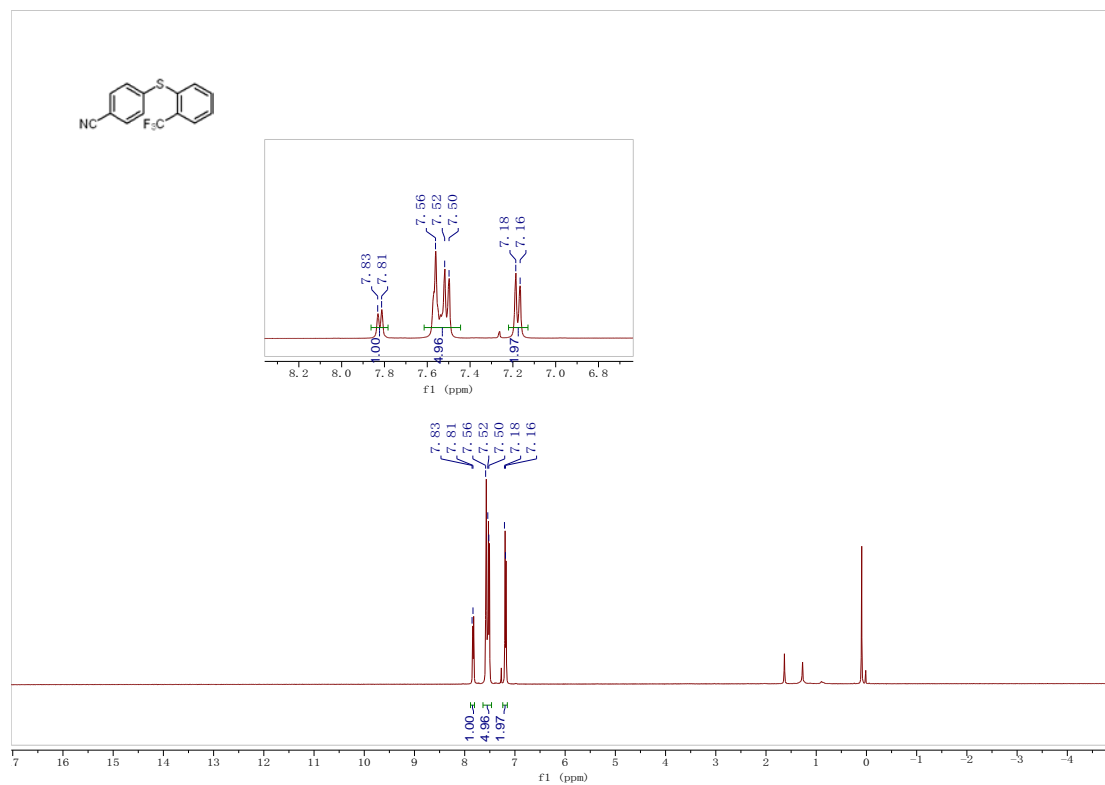

<sup>13</sup>C NMR Spectrum of **3al** (101 MHz, CDCl<sub>3</sub>)

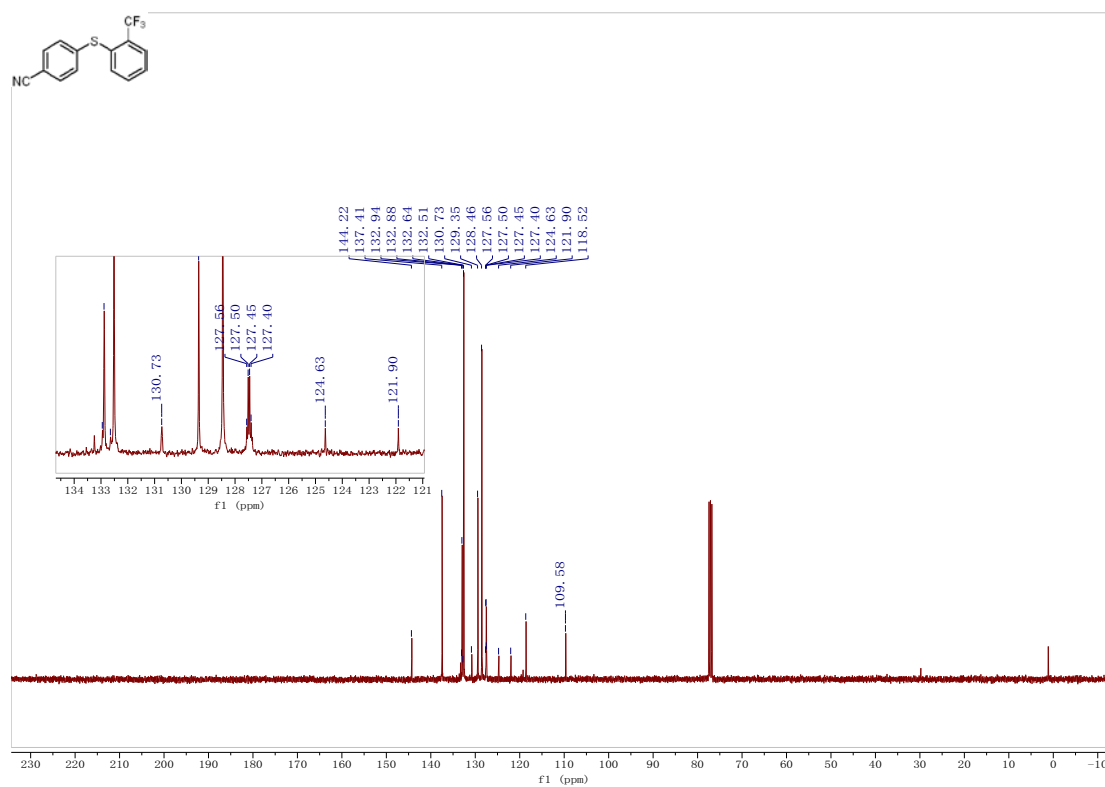

$^{19}\text{F}$  NMR Spectrum of **3al** (376 MHz,  $\text{CDCl}_3$ )

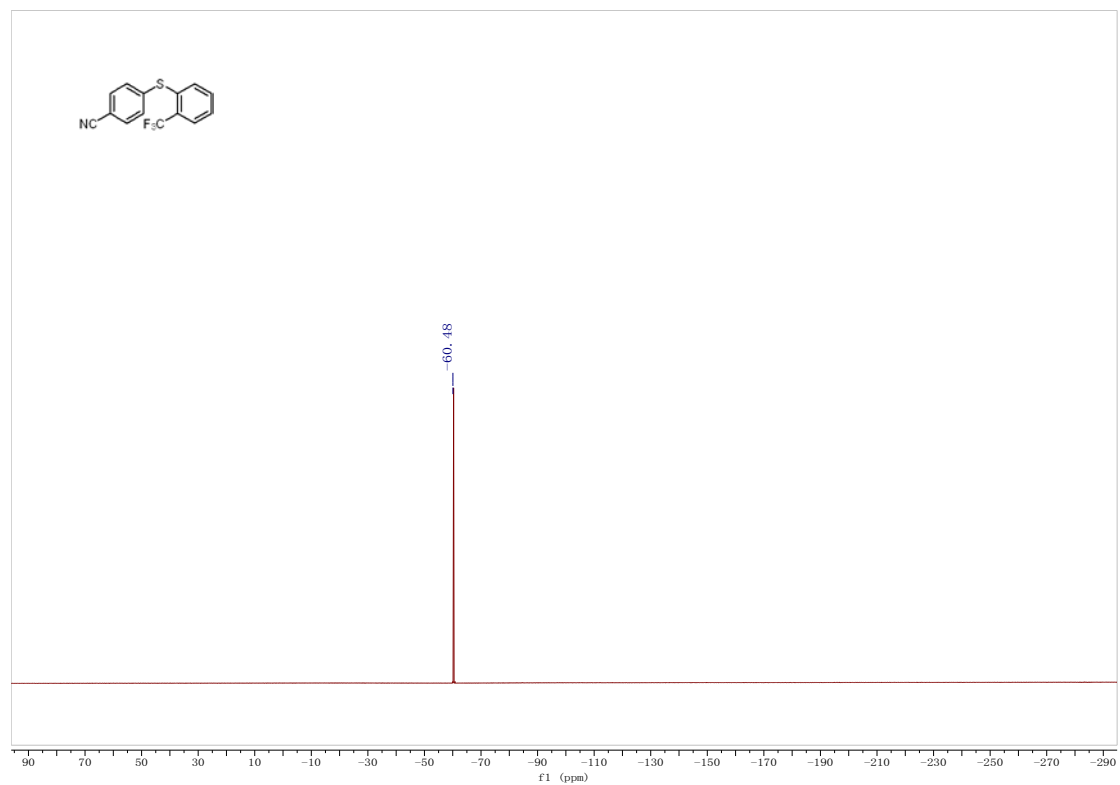

<sup>1</sup>H NMR Spectrum of **3am** (400 MHz, CDCl<sub>3</sub>)

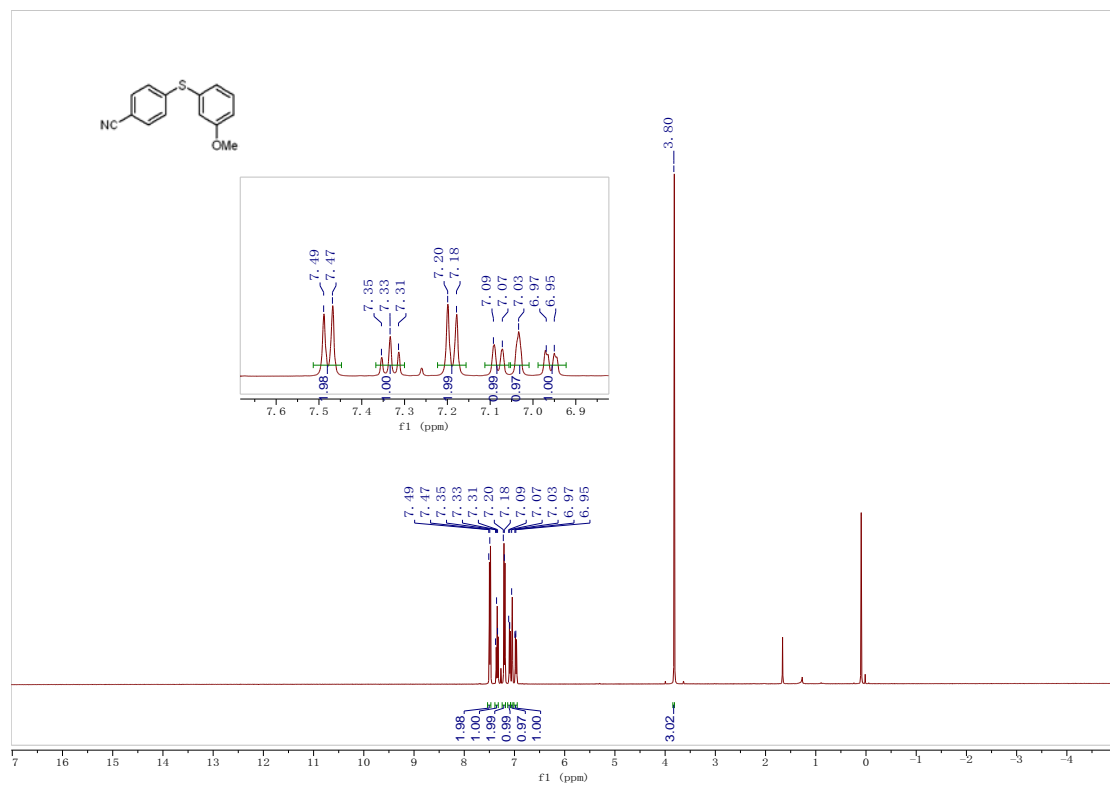

<sup>13</sup>C NMR Spectrum of **3am** (101 MHz, CDCl<sub>3</sub>)

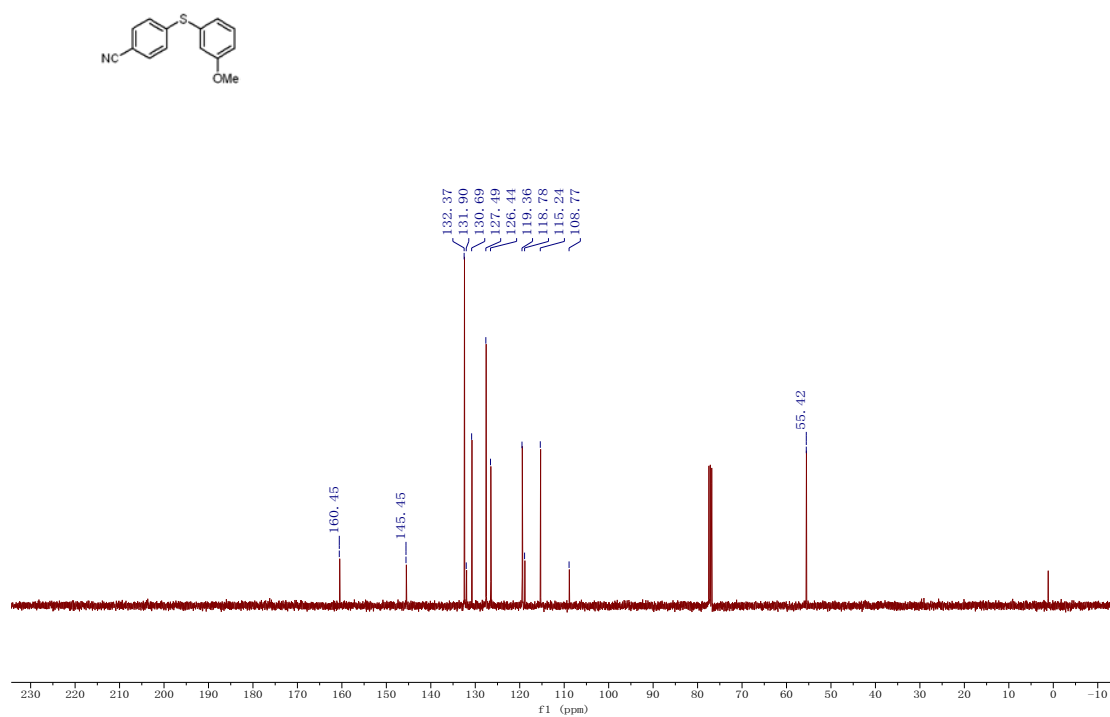

<sup>1</sup>H NMR Spectrum of **3an** (400 MHz, CDCl<sub>3</sub>)

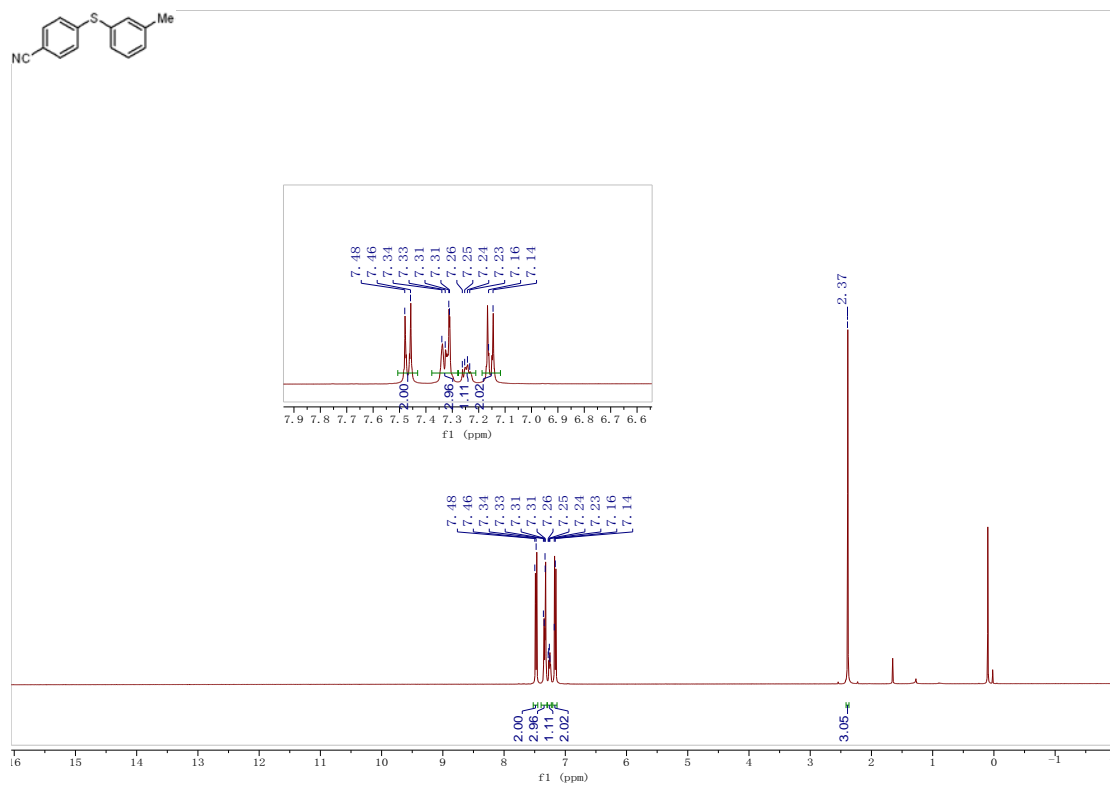

<sup>13</sup>C NMR Spectrum of **3an** (101 MHz, CDCl<sub>3</sub>)

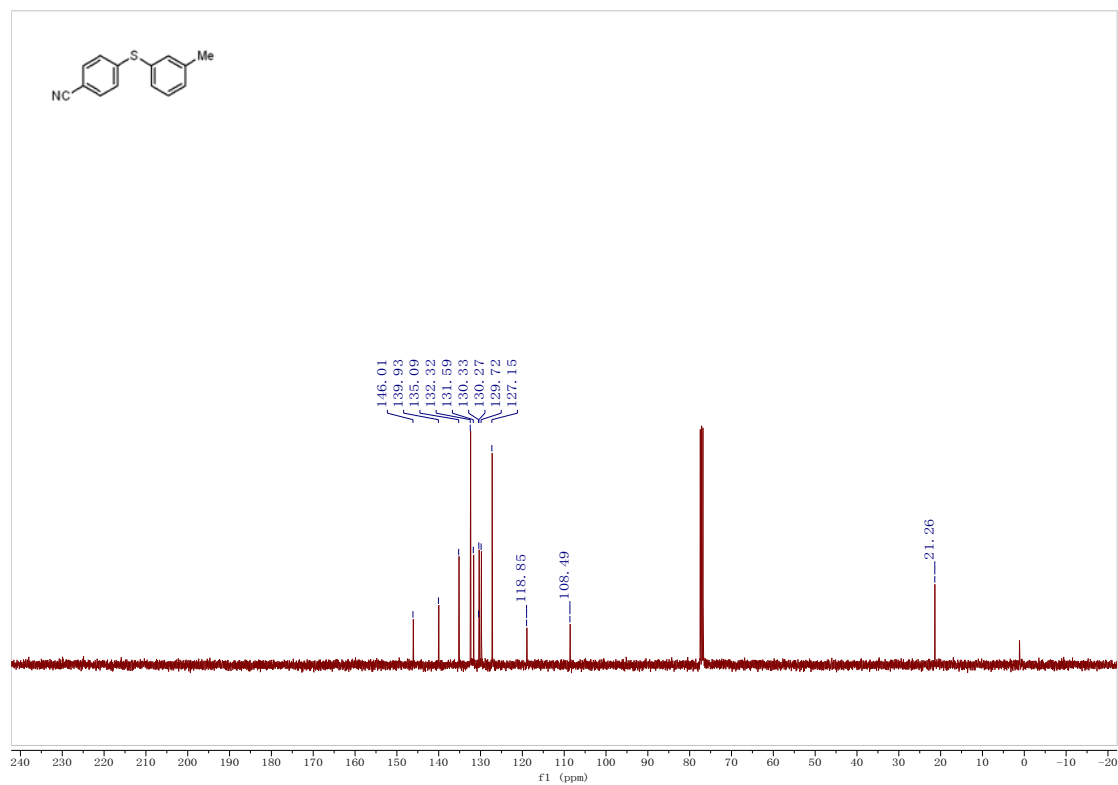

<sup>1</sup>H NMR Spectrum of **3ao** (400 MHz, CDCl<sub>3</sub>)

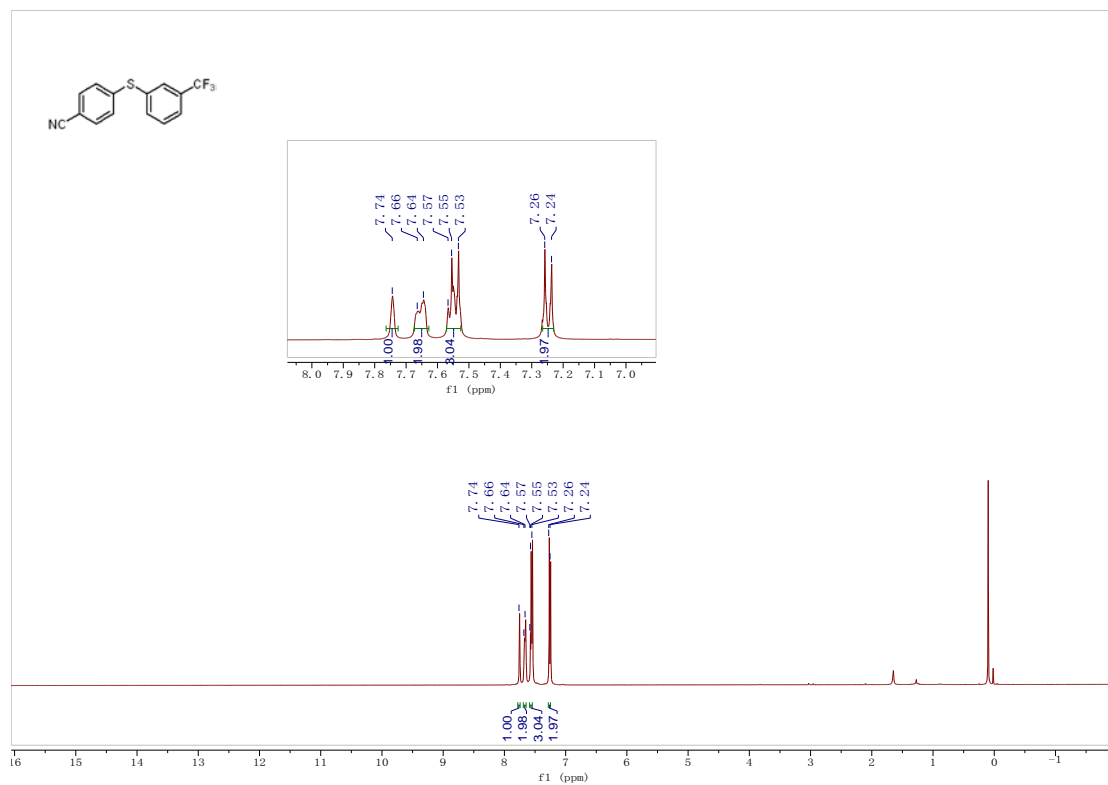

<sup>13</sup>C NMR Spectrum of **3ao** (101 MHz, CDCl<sub>3</sub>)

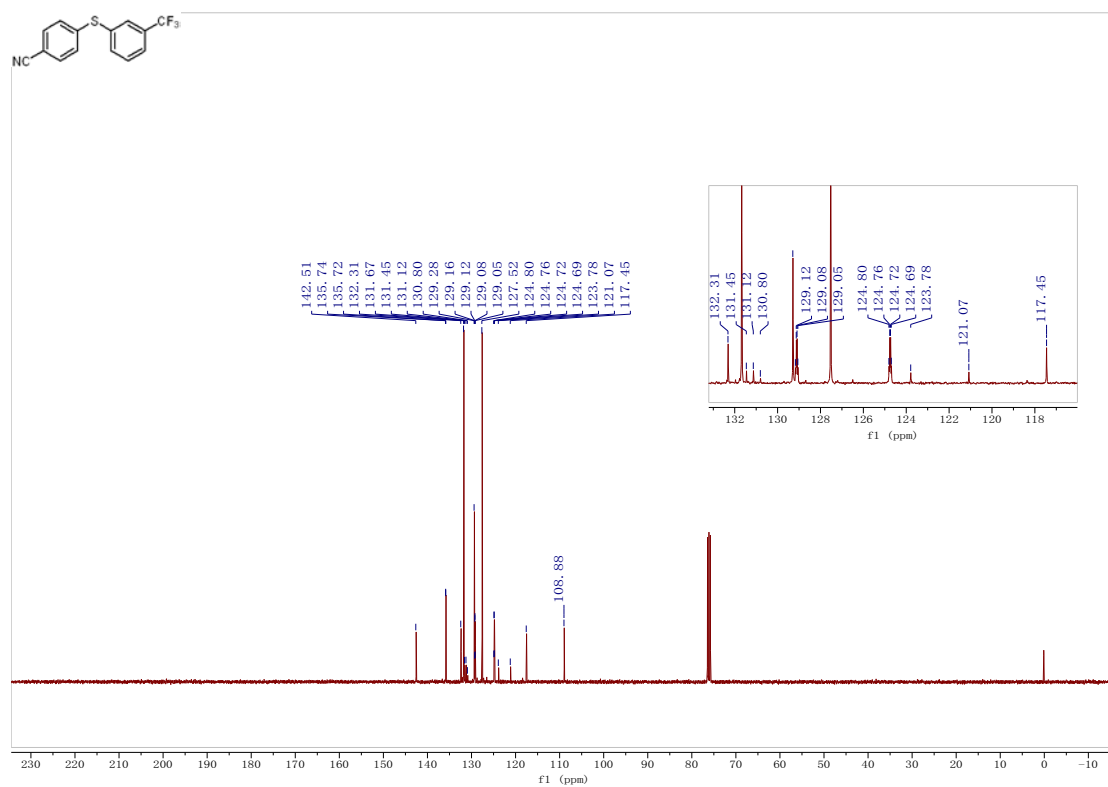

<sup>19</sup>F NMR Spectrum of **3ao** (376 MHz, CDCl<sub>3</sub>)

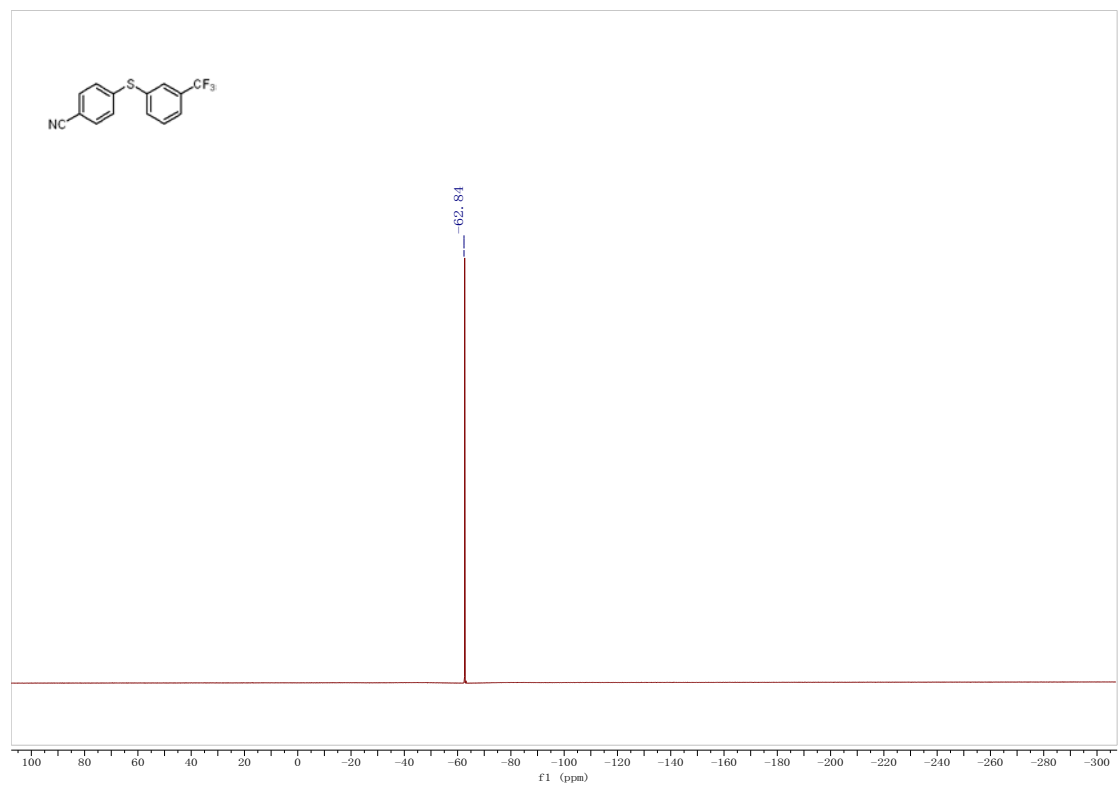



<sup>1</sup>H NMR Spectrum of **3ap** (400 MHz, CDCl<sub>3</sub>)

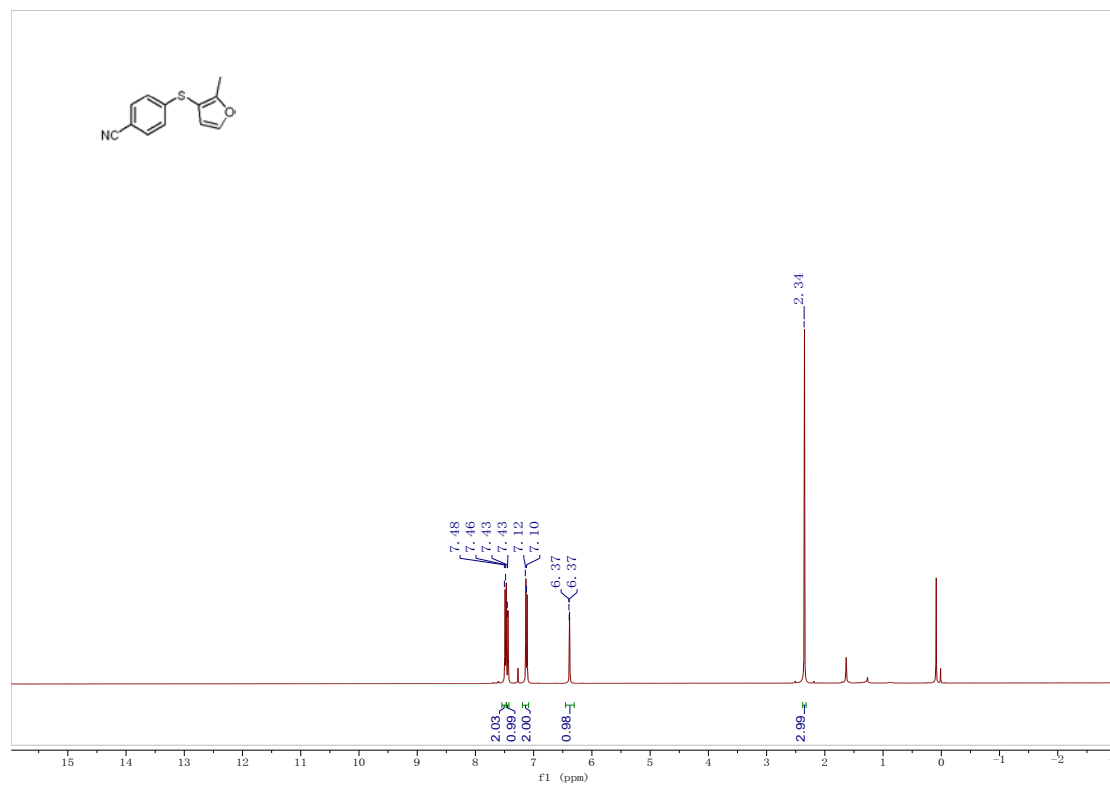

<sup>13</sup>C NMR Spectrum of **3ap** (101 MHz, CDCl<sub>3</sub>)

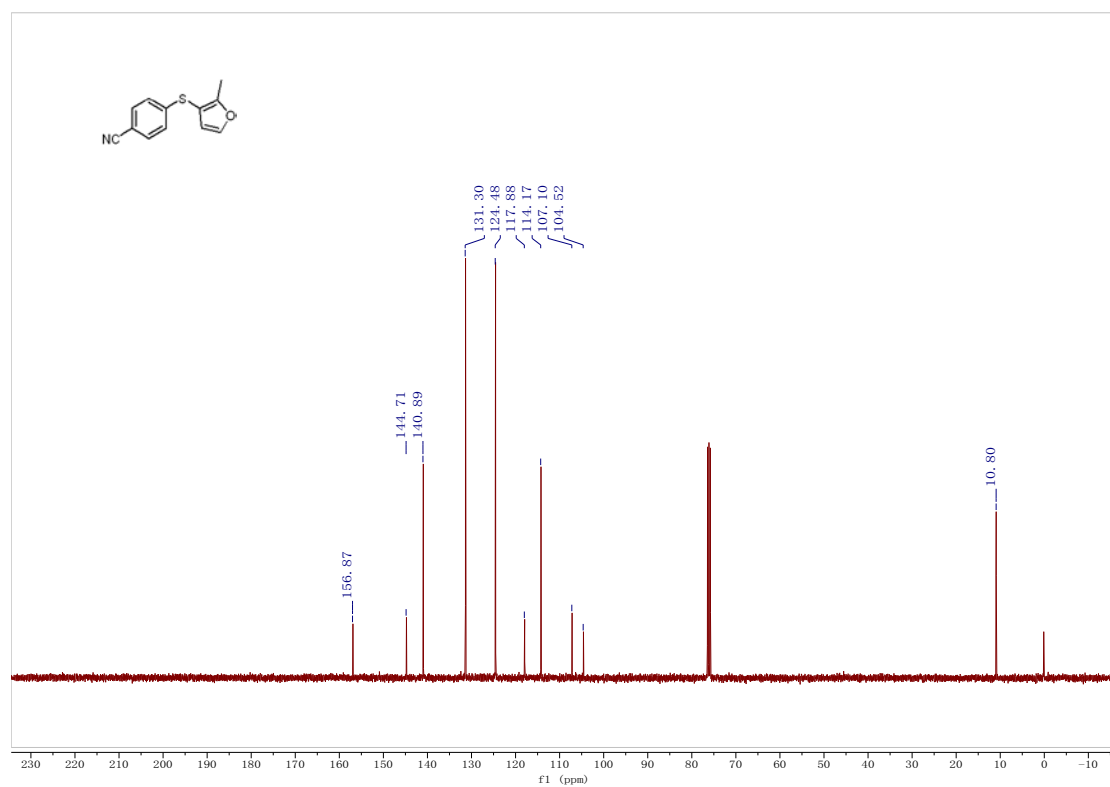

<sup>1</sup>H NMR Spectrum of **3ar** (400 MHz, CDCl<sub>3</sub>)

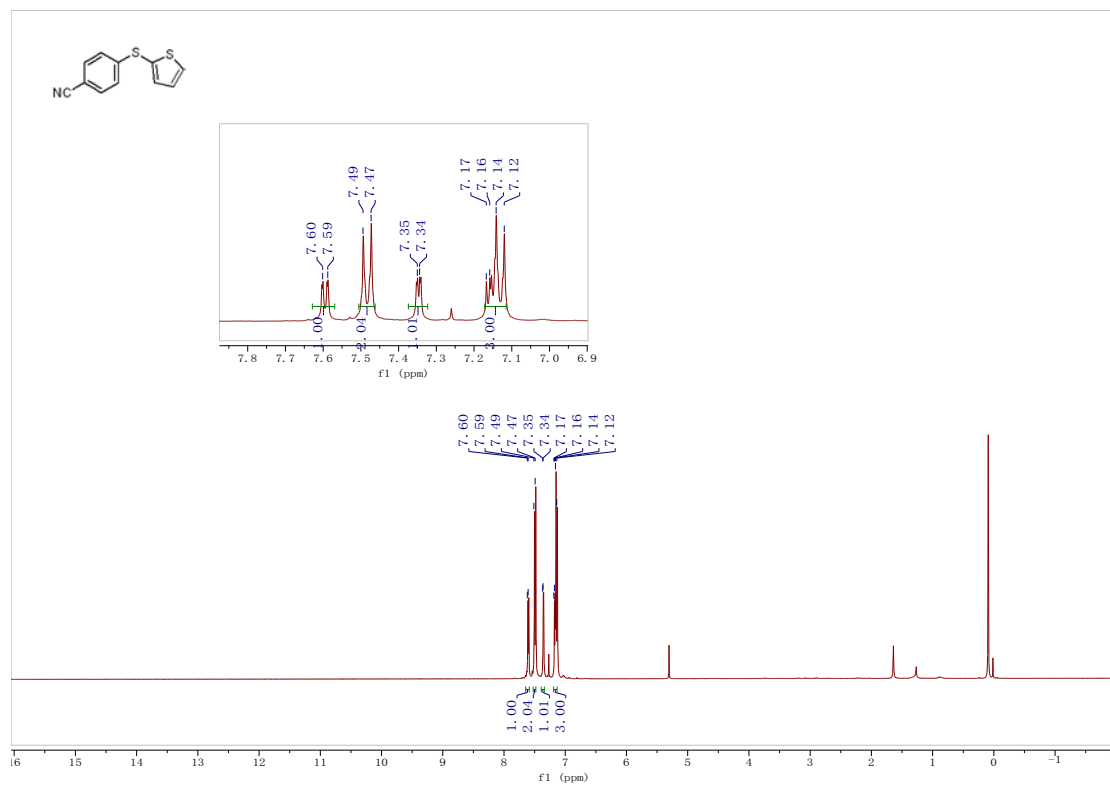

<sup>13</sup>C NMR Spectrum of **3ar** (101 MHz, CDCl<sub>3</sub>)

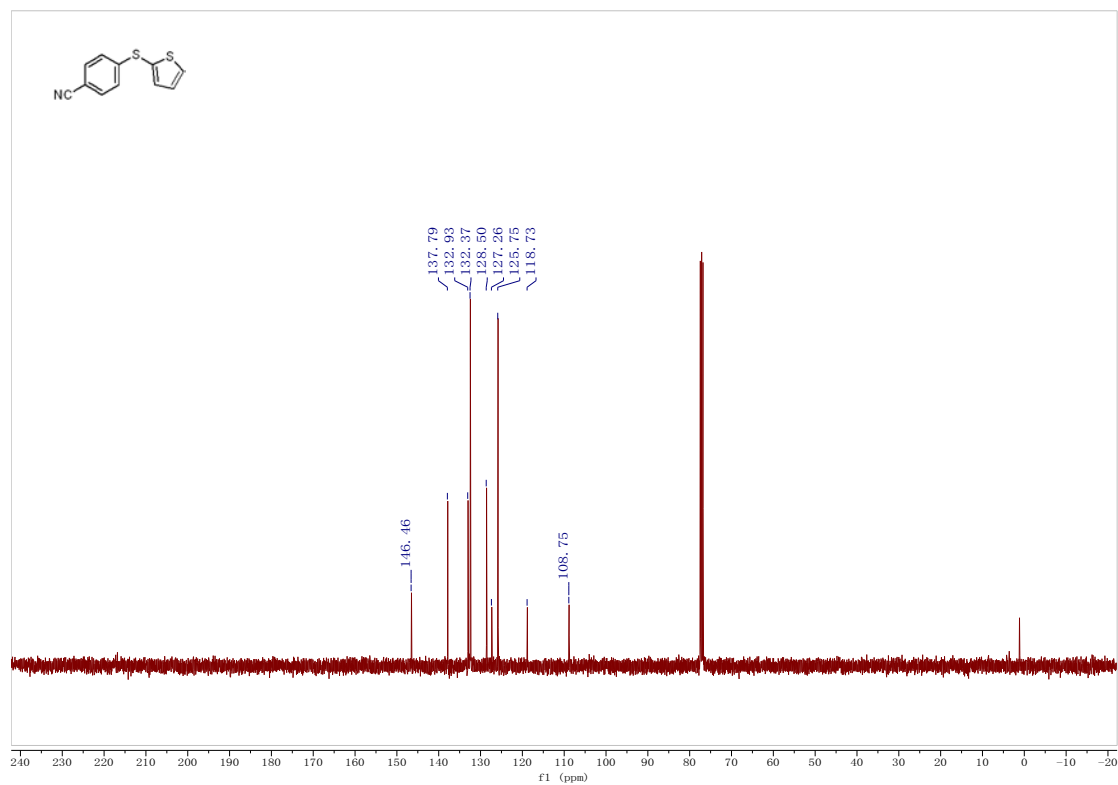

<sup>1</sup>H NMR Spectrum of **3as** (400 MHz, CDCl<sub>3</sub>)

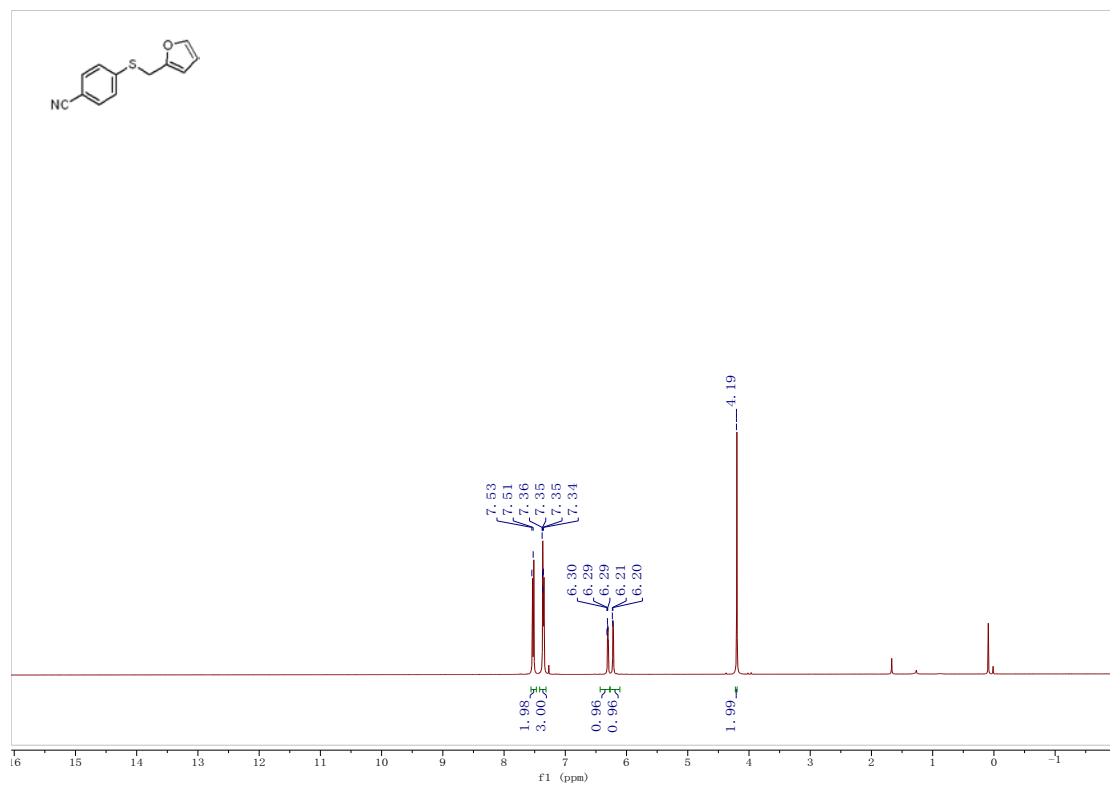

<sup>13</sup>C NMR Spectrum of **3as** (101 MHz, CDCl<sub>3</sub>)

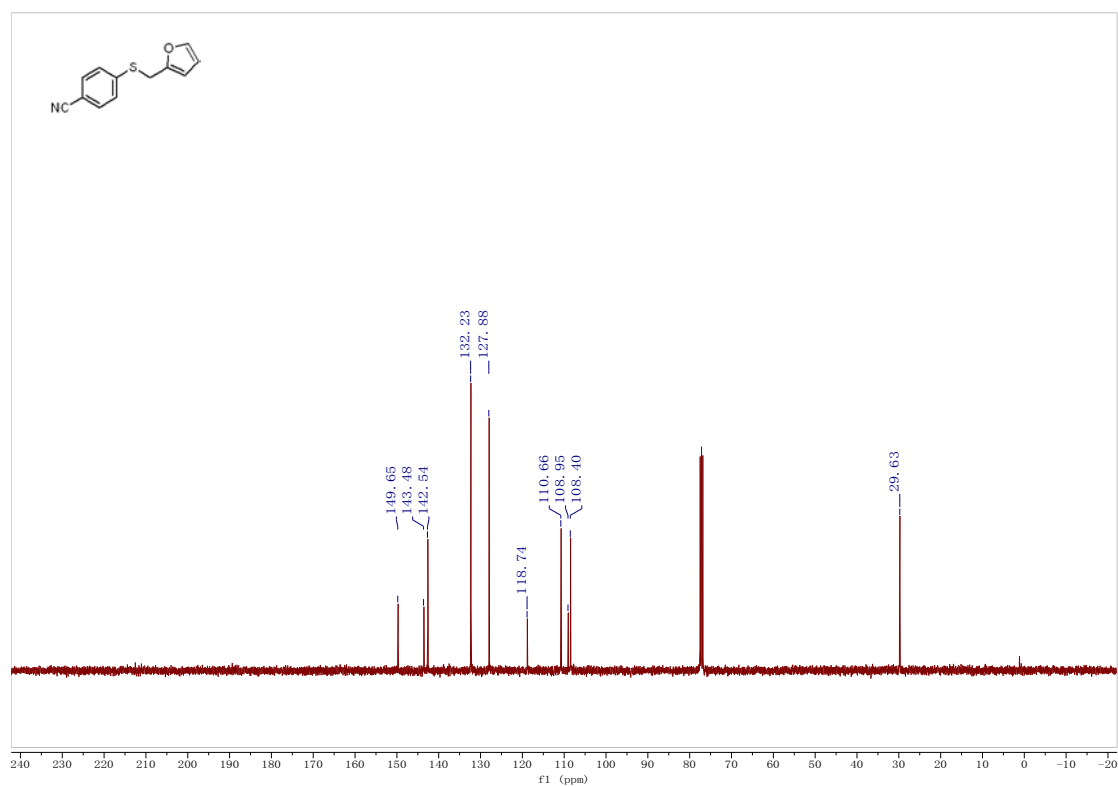

<sup>1</sup>H NMR Spectrum of **3at** (400 MHz, CDCl<sub>3</sub>)

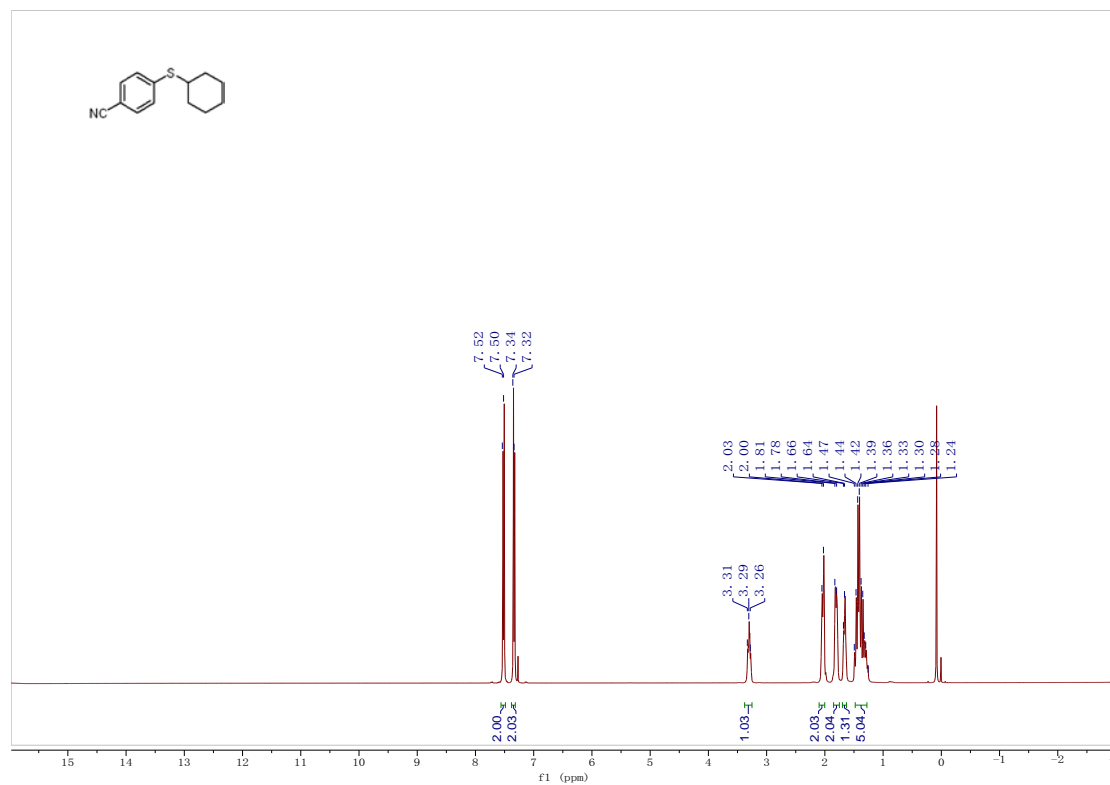

<sup>13</sup>C NMR Spectrum of **3at** (101 MHz, CDCl<sub>3</sub>)

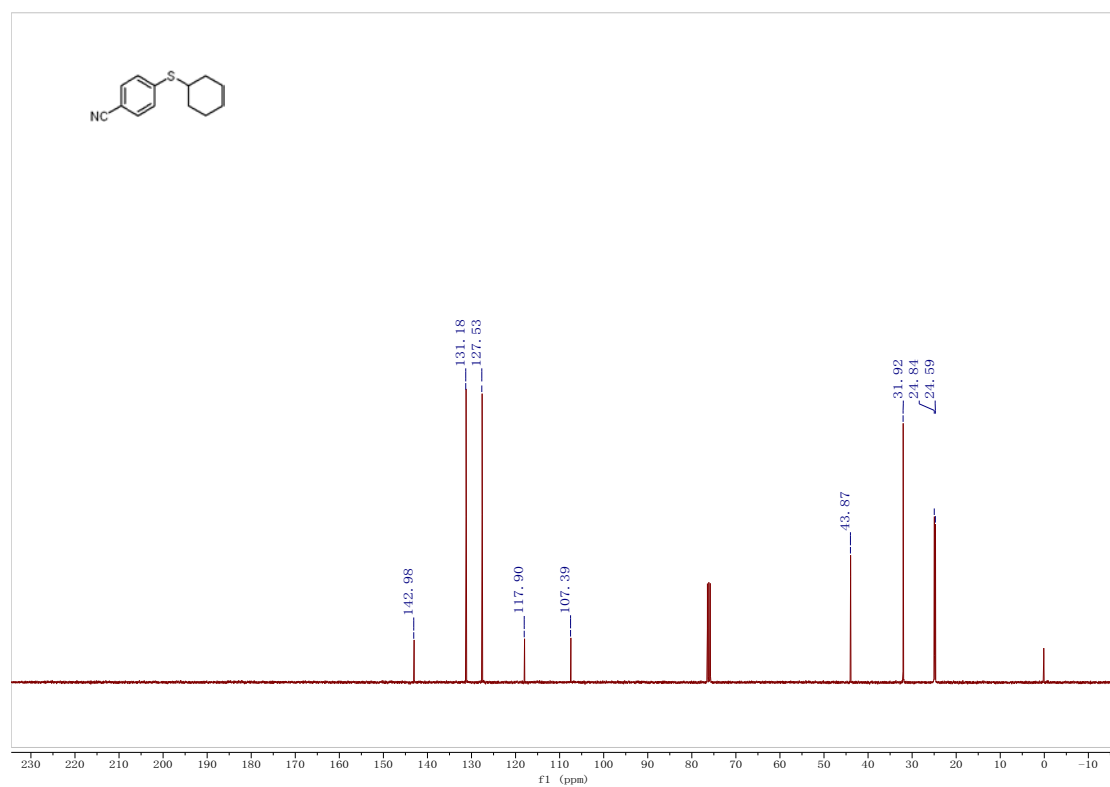

$^1\text{H}$  NMR Spectrum of **3au** (400 MHz,  $\text{CDCl}_3$ )

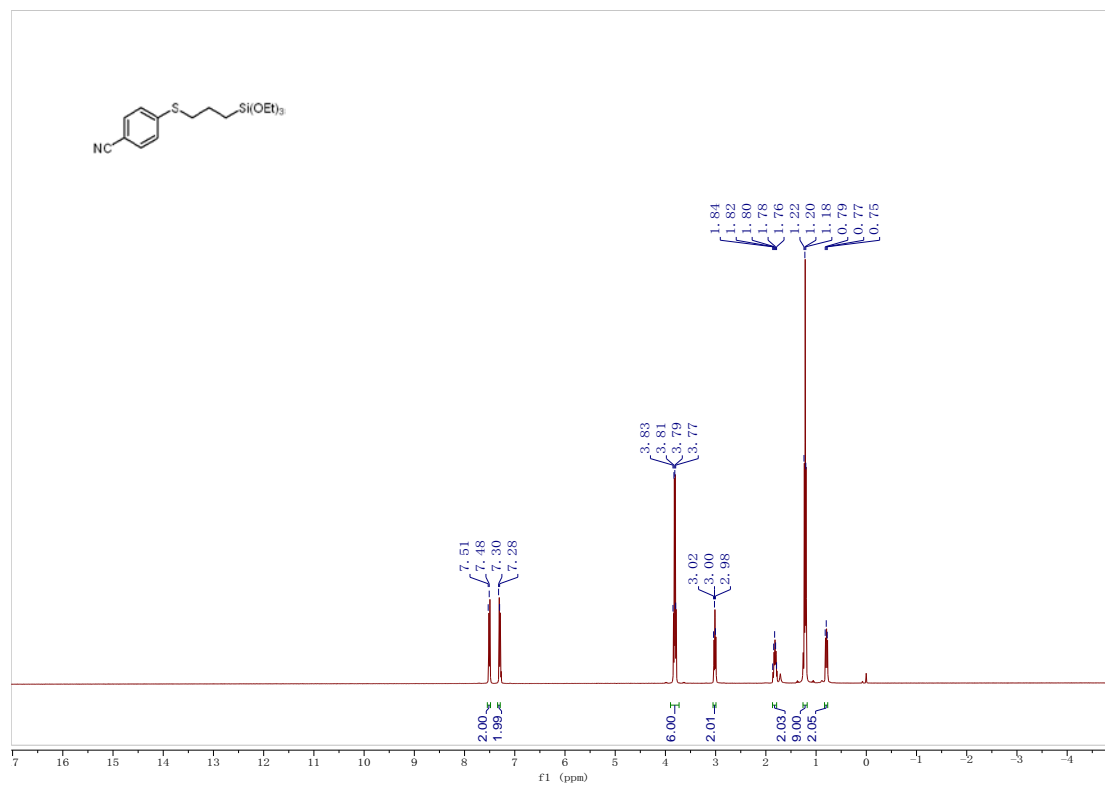

$^{13}\text{C}$  NMR Spectrum of **3au** (101 MHz,  $\text{CDCl}_3$ )

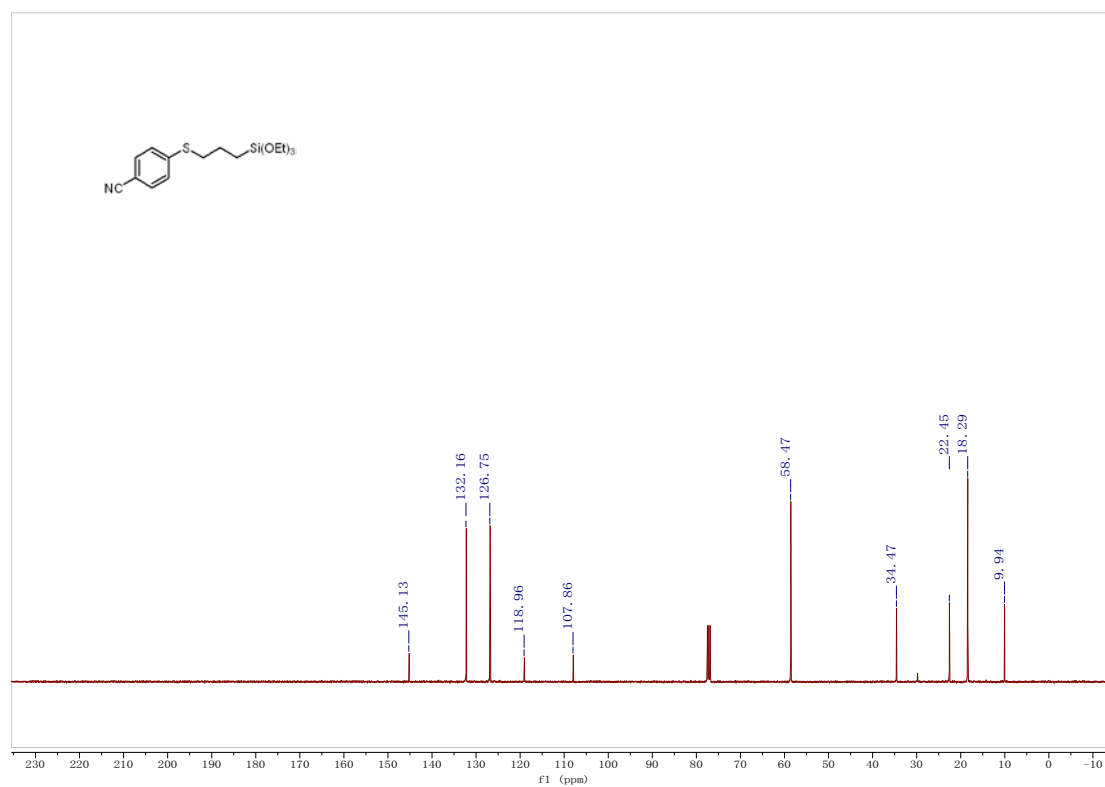

<sup>1</sup>H NMR Spectrum of **3av** (400 MHz, CDCl<sub>3</sub>)

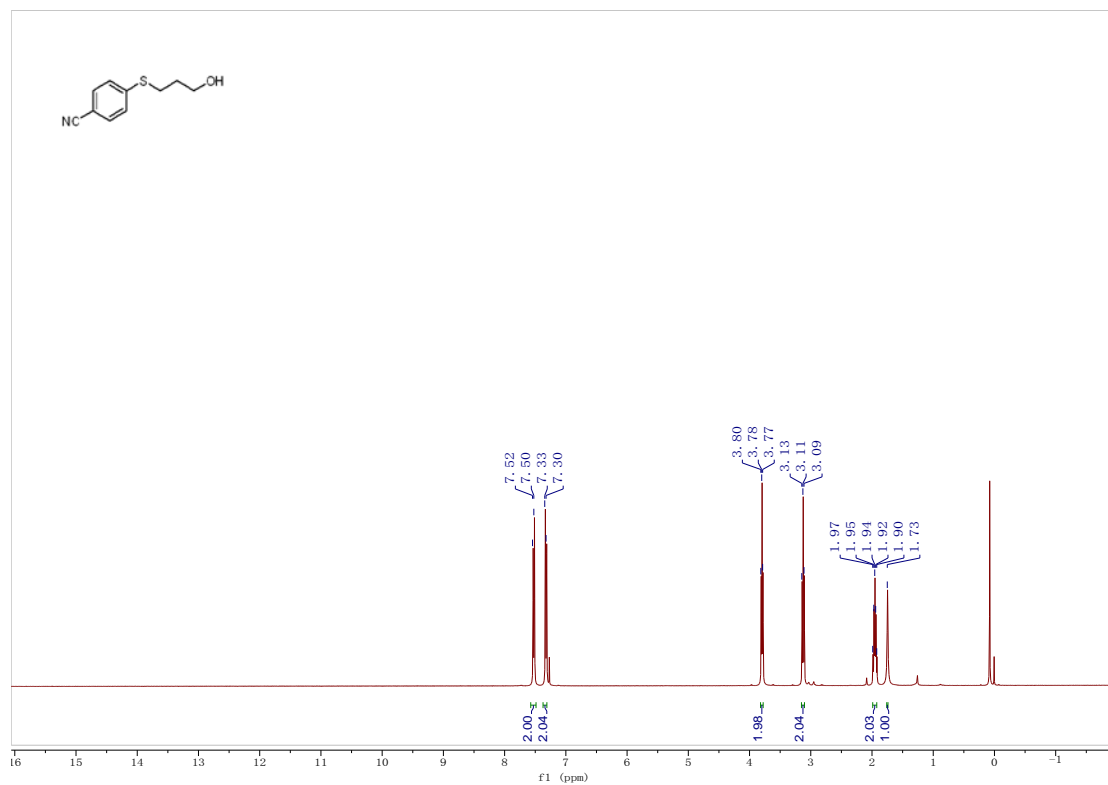

<sup>13</sup>C NMR Spectrum of **3av** (101 MHz, CDCl<sub>3</sub>)

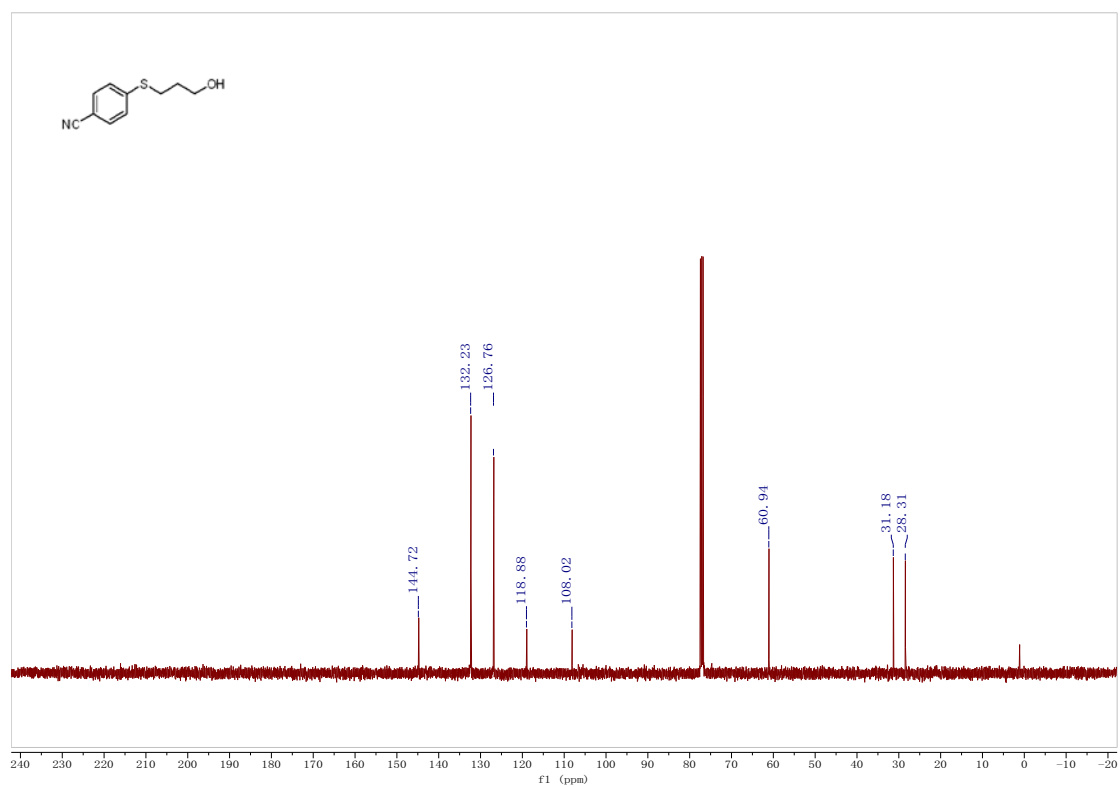

$^1\text{H}$  NMR Spectrum of **3aw** (400 MHz,  $\text{CDCl}_3$ )

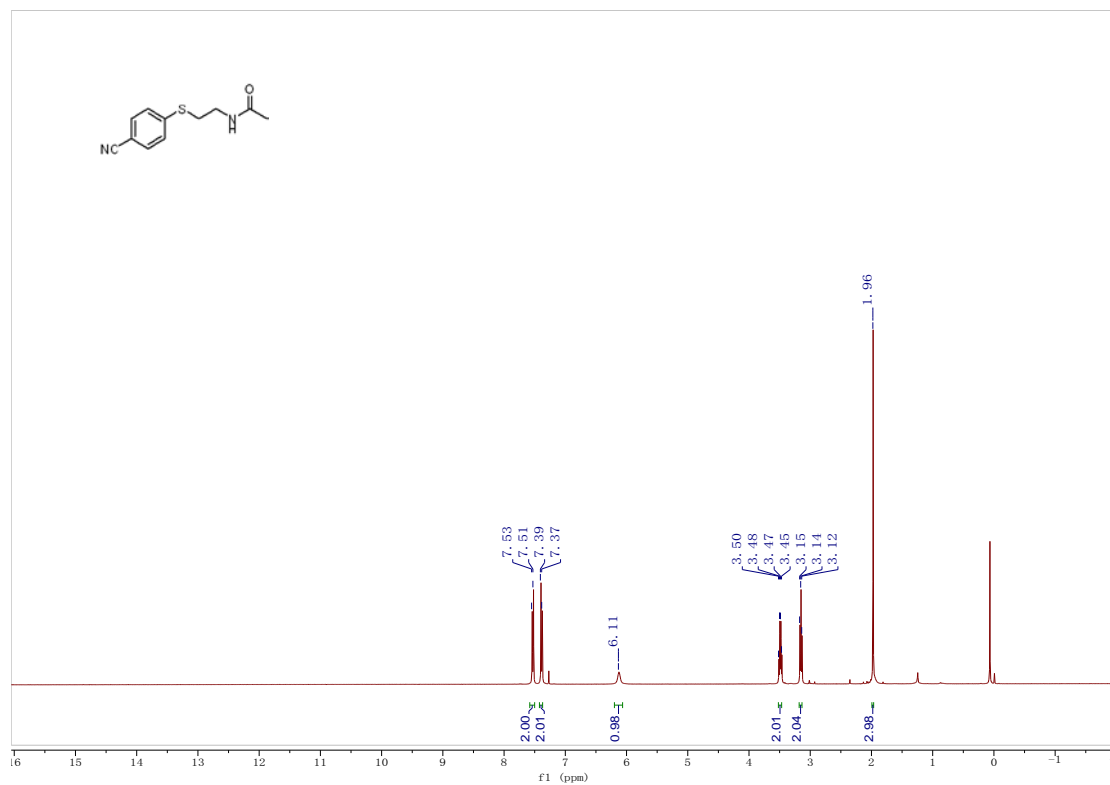

$^{13}\text{C}$  NMR Spectrum of **3aw** (101 MHz,  $\text{CDCl}_3$ )

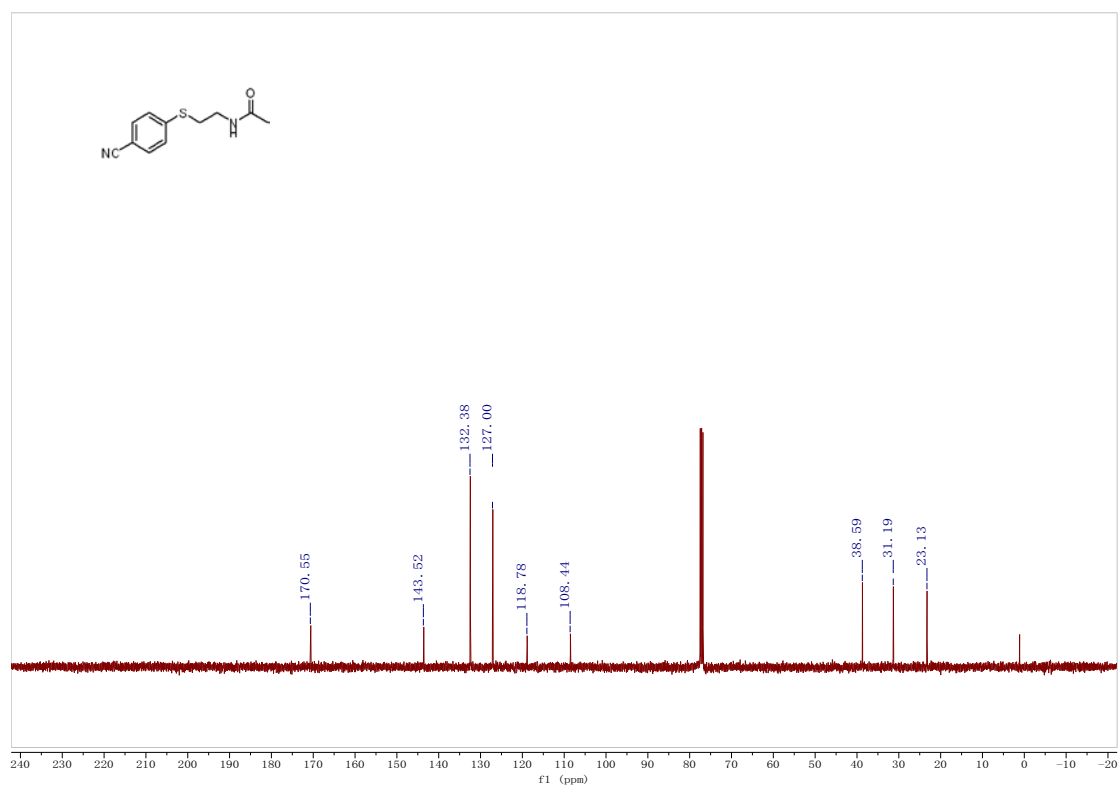

<sup>1</sup>H NMR Spectrum of **3ax** (400 MHz, DMSO-*d*<sub>6</sub>)

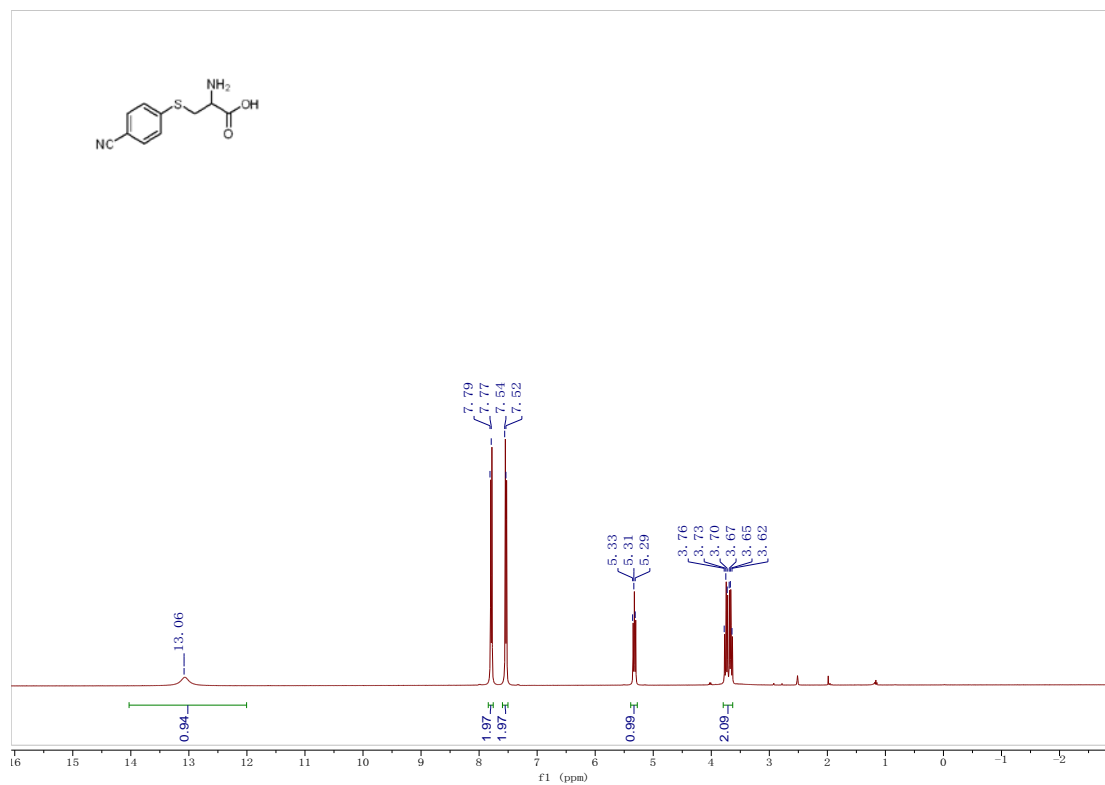

<sup>13</sup>C NMR Spectrum of **3ax** (101 MHz, DMSO-*d*<sub>6</sub>)

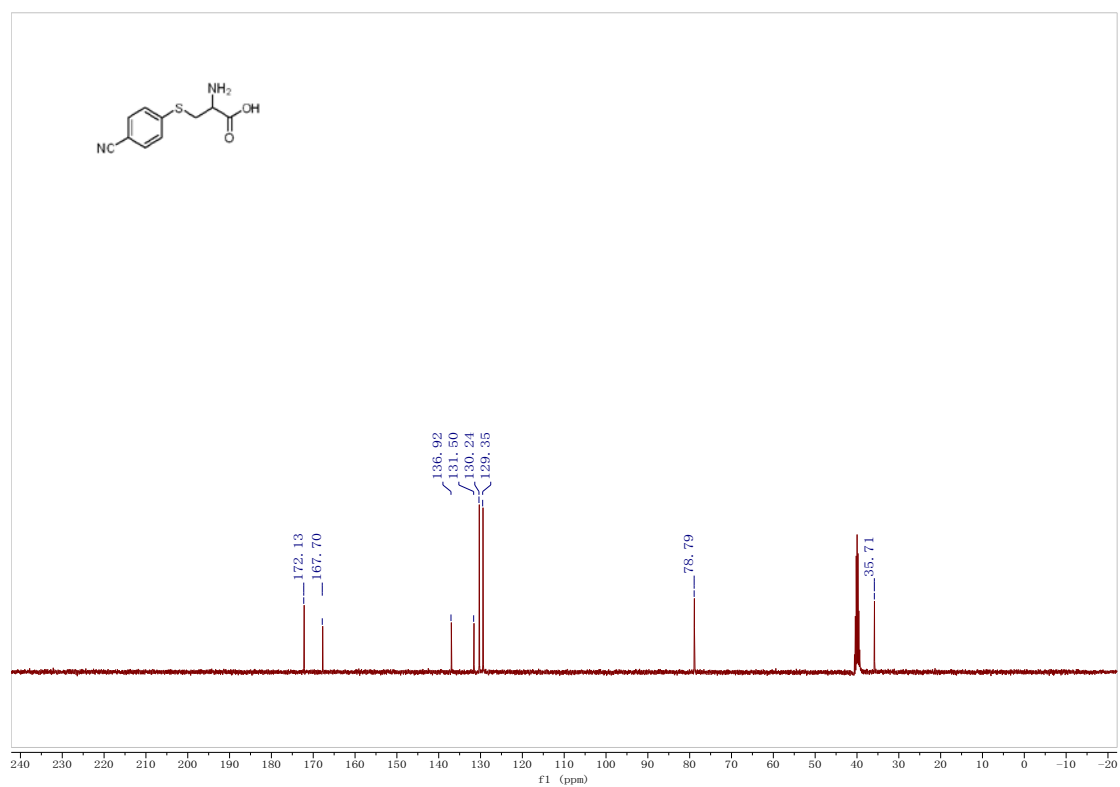



<sup>1</sup>H NMR Spectrum of **3ay** (500 MHz, DMSO-*d*<sub>6</sub>)

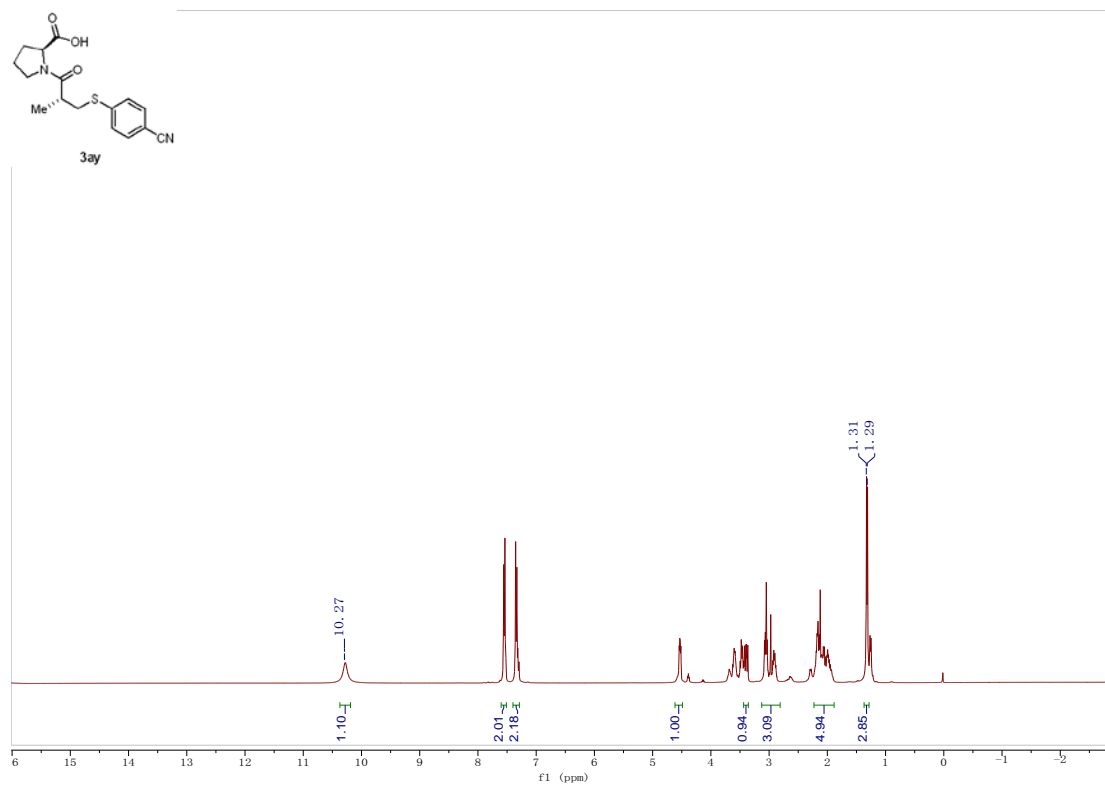

<sup>13</sup>C NMR Spectrum of **3ay** (126 MHz, DMSO-*d*<sub>6</sub>)

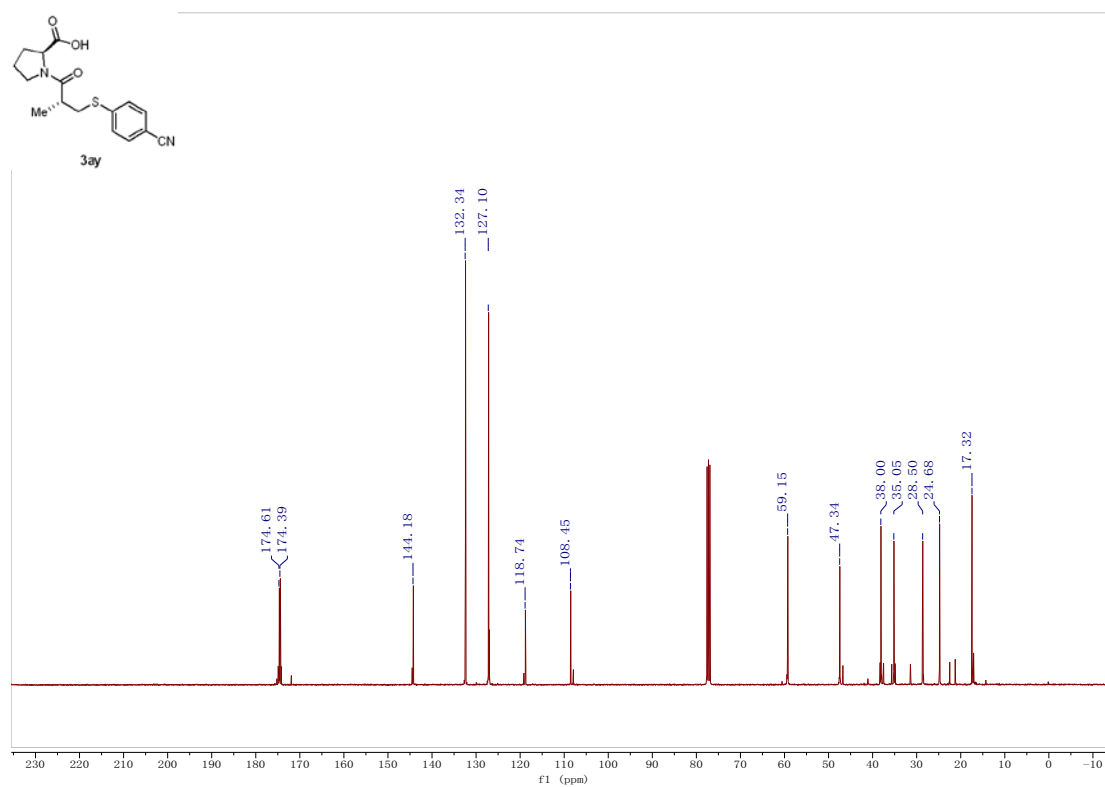

<sup>1</sup>H NMR Spectrum of **3az** (126 MHz, CDCl<sub>3</sub>)

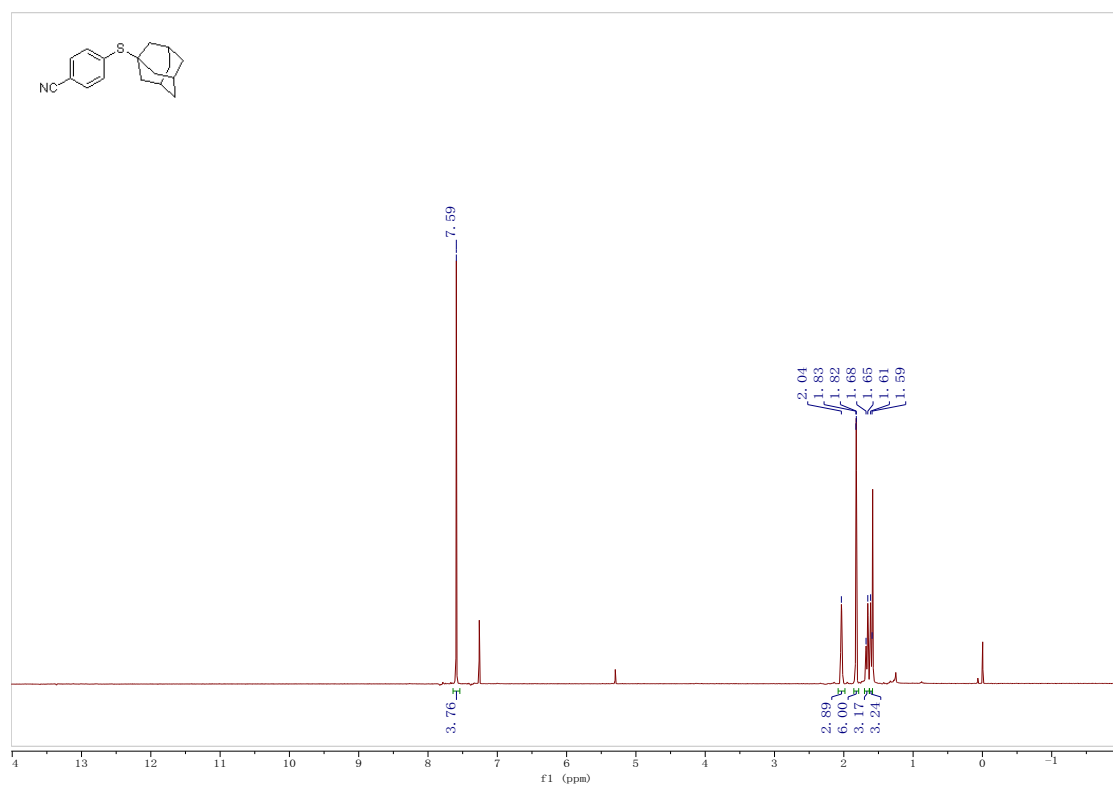

<sup>13</sup>C NMR Spectrum of **3az** (126 MHz, CDCl<sub>3</sub>)

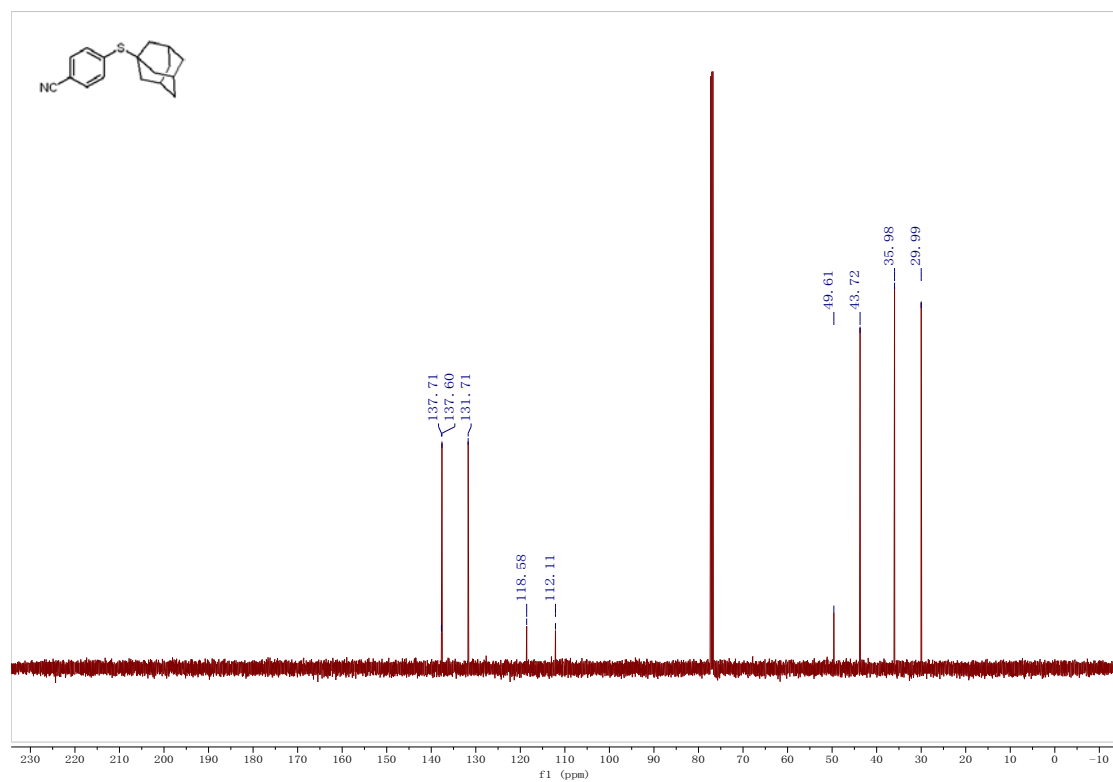

<sup>1</sup>H NMR Spectrum of **3ba** (400 MHz, CDCl<sub>3</sub>)

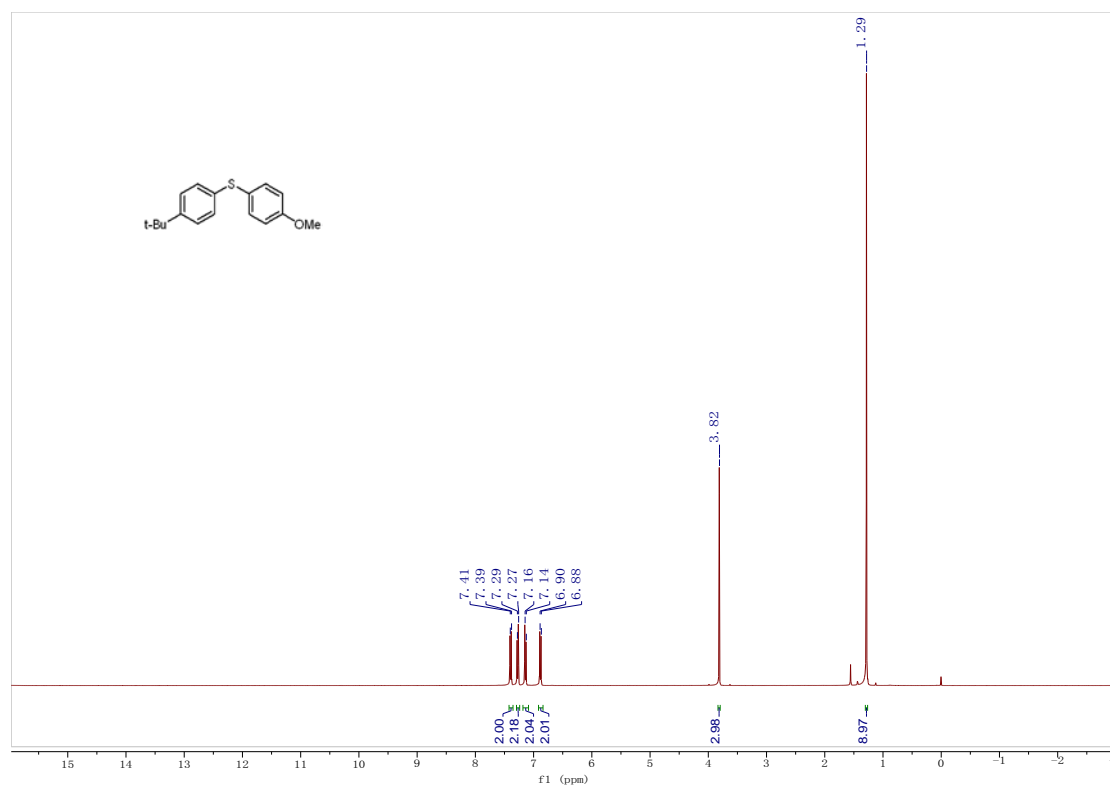

<sup>13</sup>C NMR Spectrum of **3ba** (101 MHz, CDCl<sub>3</sub>)

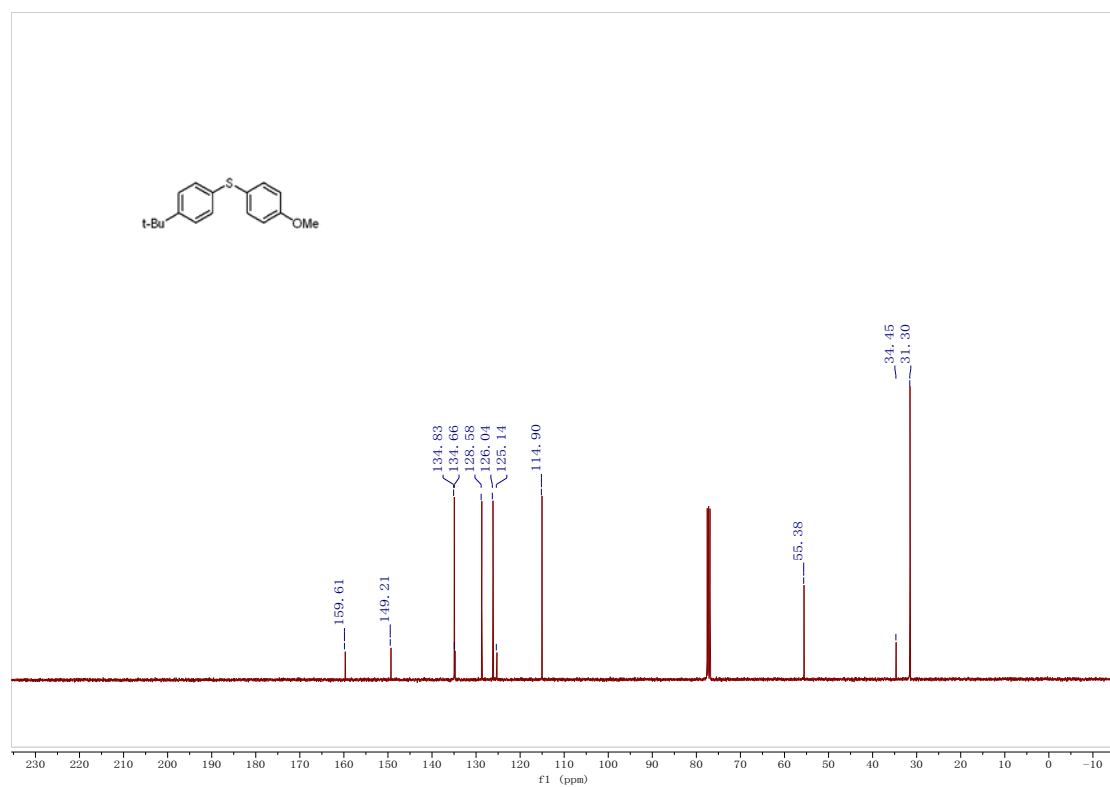

$^1\text{H}$  NMR Spectrum of **3bb** (400 MHz,  $\text{CDCl}_3$ )

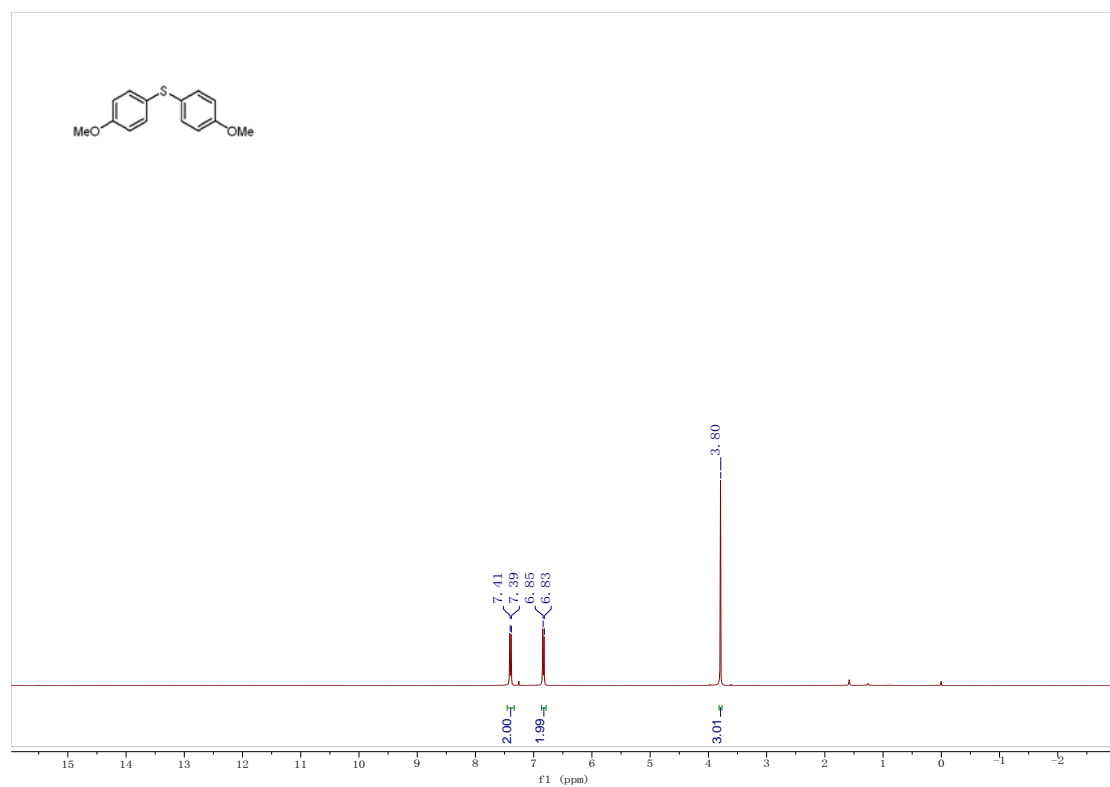

$^{13}\text{C}$  NMR Spectrum of **3bb** (101 MHz,  $\text{CDCl}_3$ )

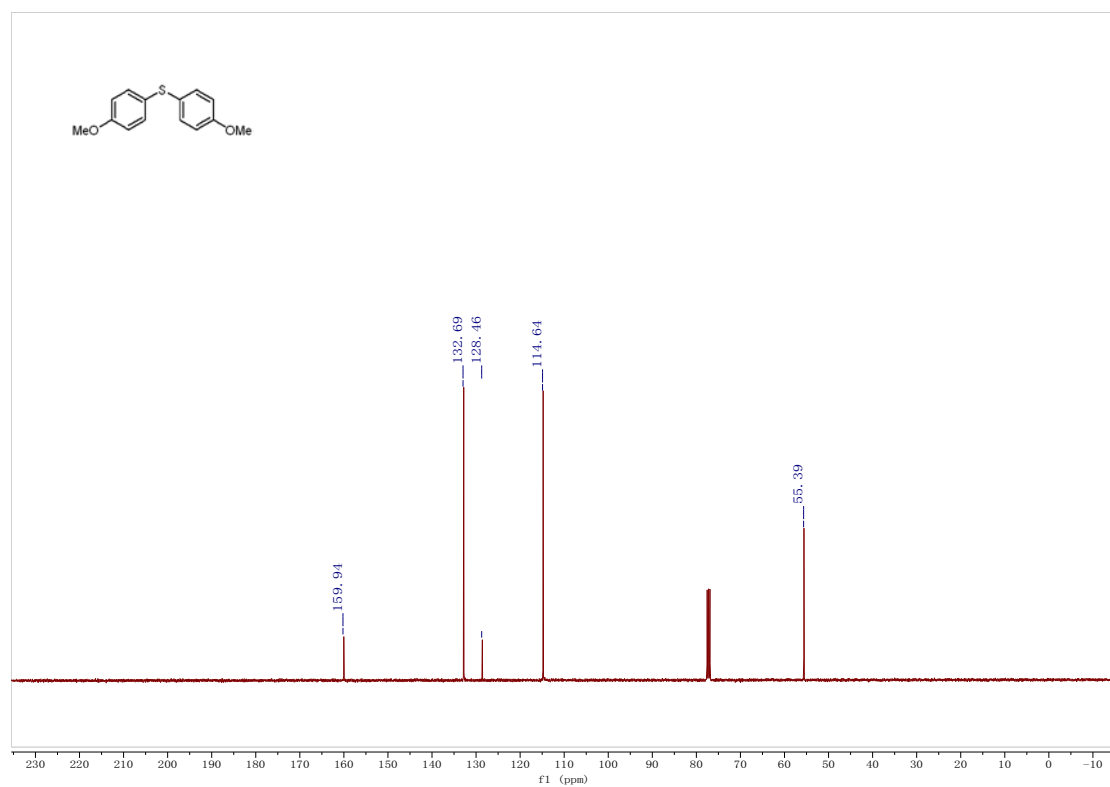

$^1\text{H}$  NMR Spectrum of **3bc** (400 MHz,  $\text{CDCl}_3$ )

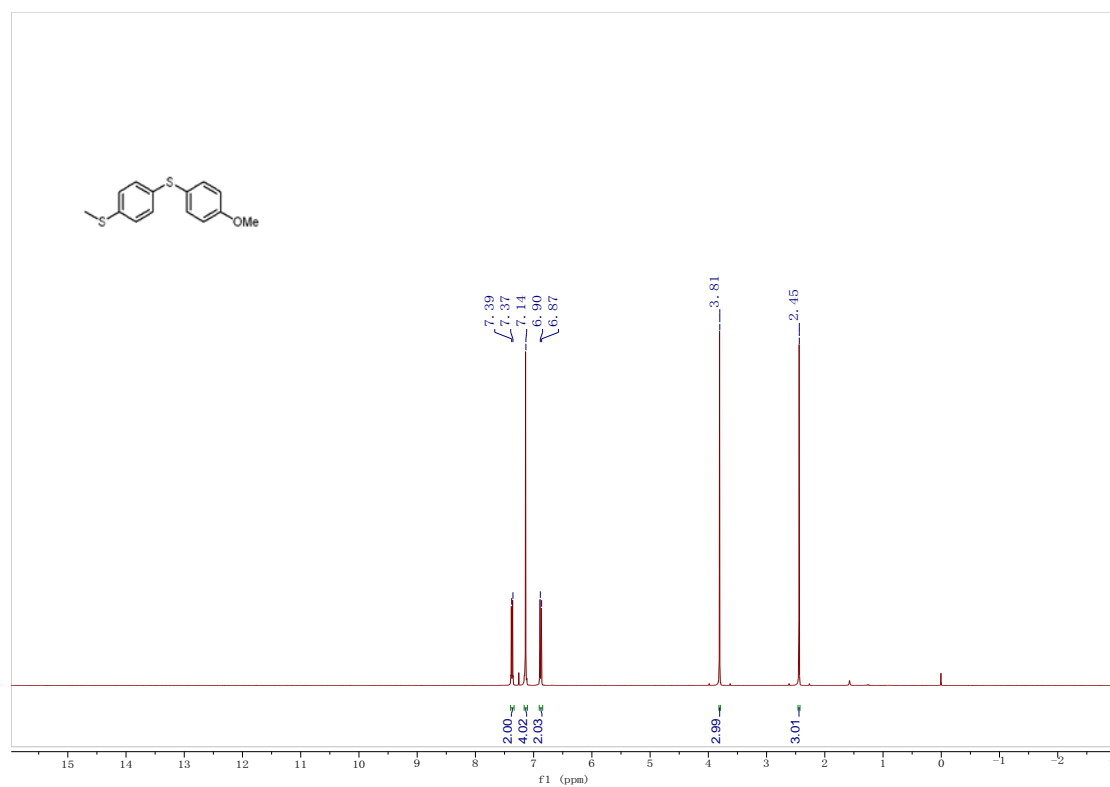

$^{13}\text{C}$  NMR Spectrum of **3bc** (101 MHz,  $\text{CDCl}_3$ )

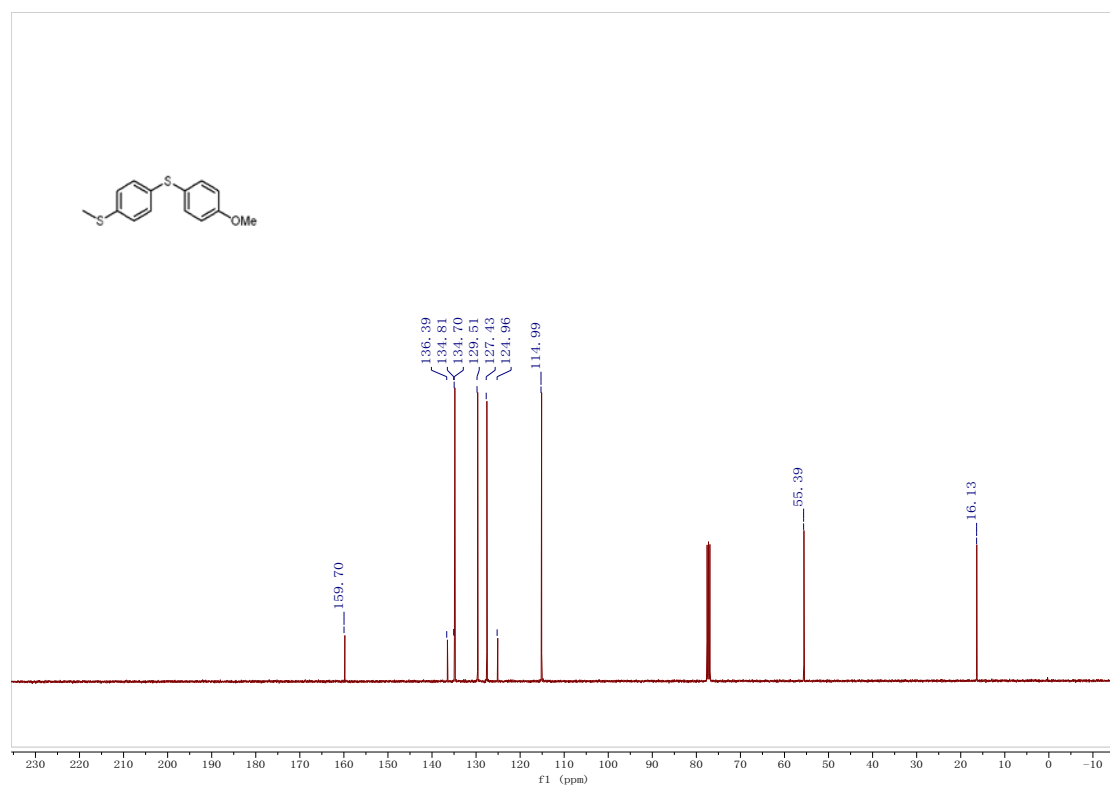

<sup>1</sup>H NMR Spectrum of **3bd** (400 MHz, CDCl<sub>3</sub>)

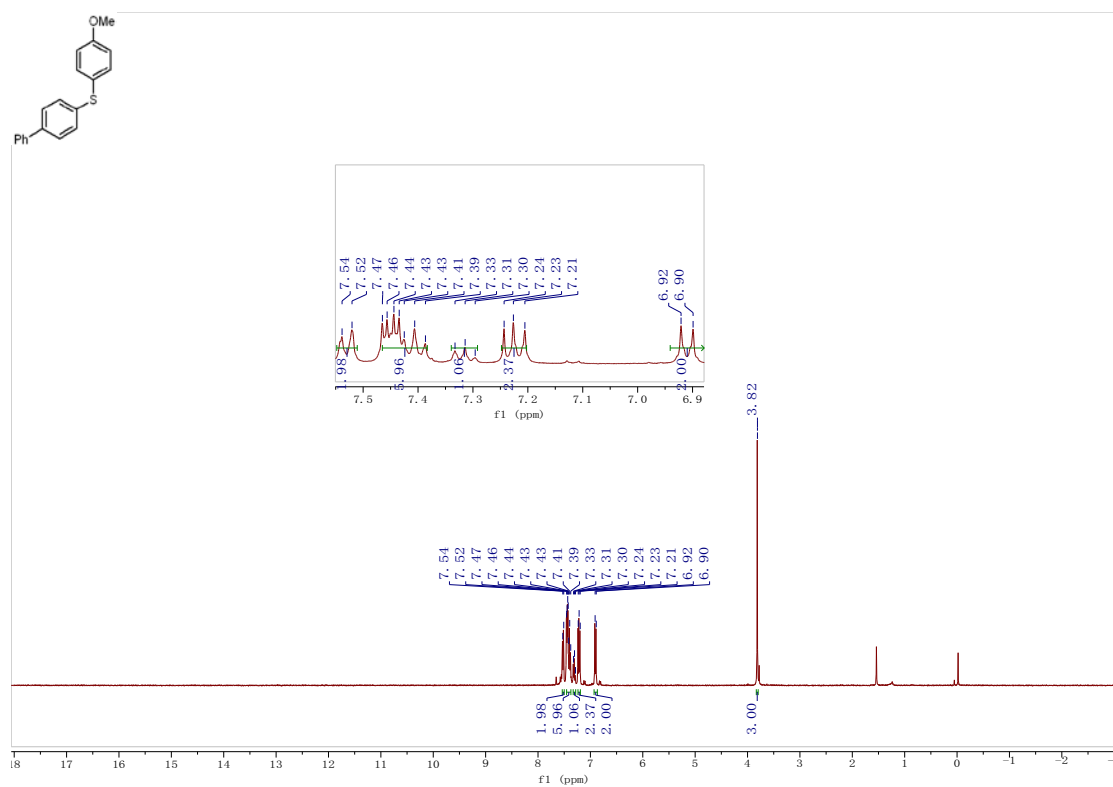

<sup>13</sup>C NMR Spectrum of **3bd** (101 MHz, CDCl<sub>3</sub>)

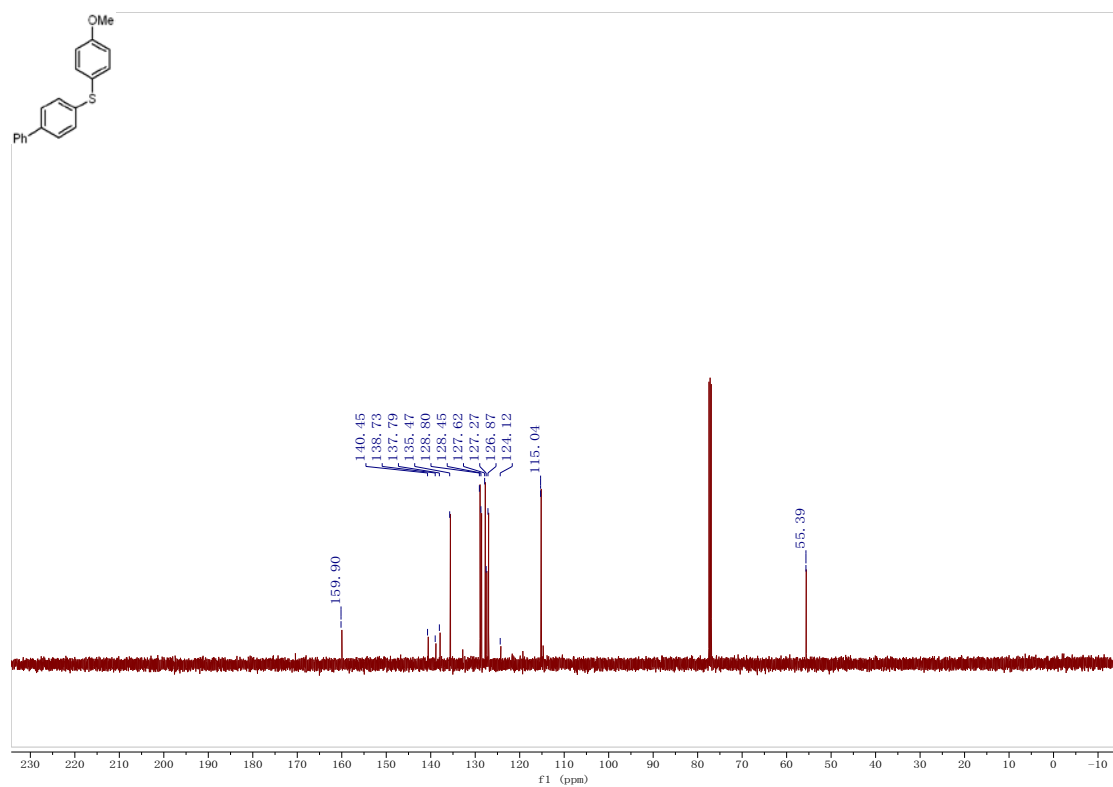

<sup>1</sup>H NMR Spectrum of **3be** (500 MHz, CDCl<sub>3</sub>)

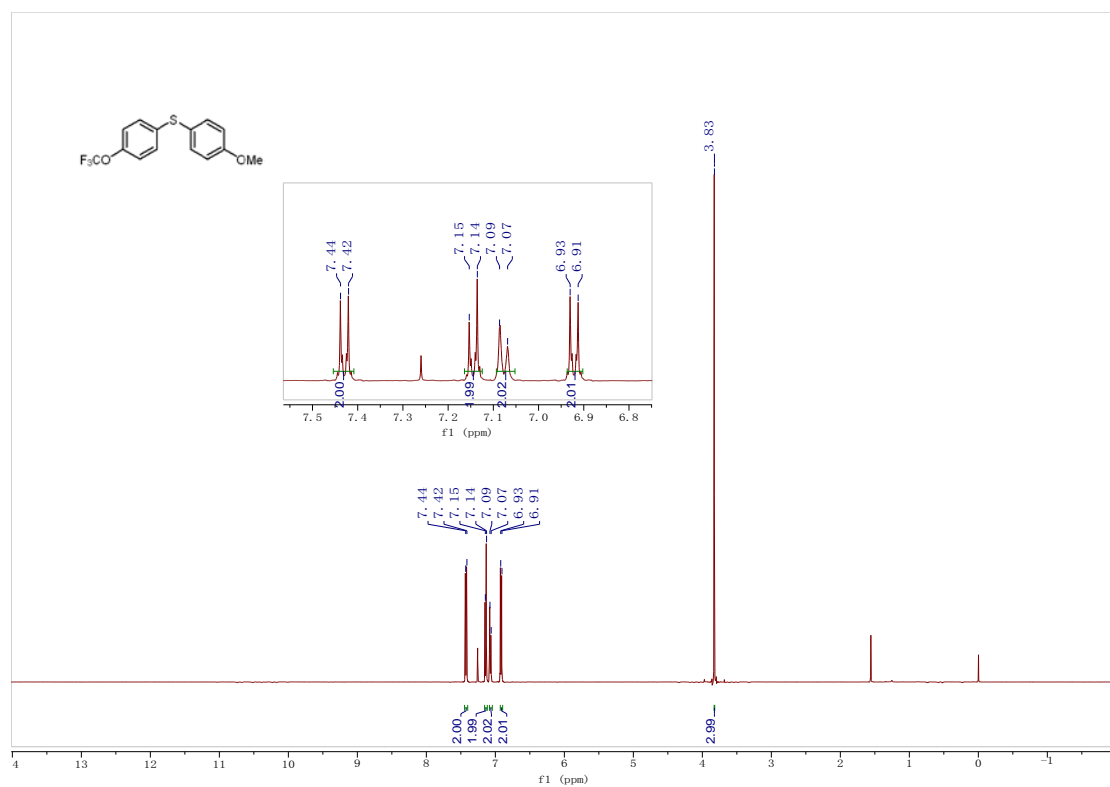

<sup>13</sup>C NMR Spectrum of **3be** (126 MHz, CDCl<sub>3</sub>)

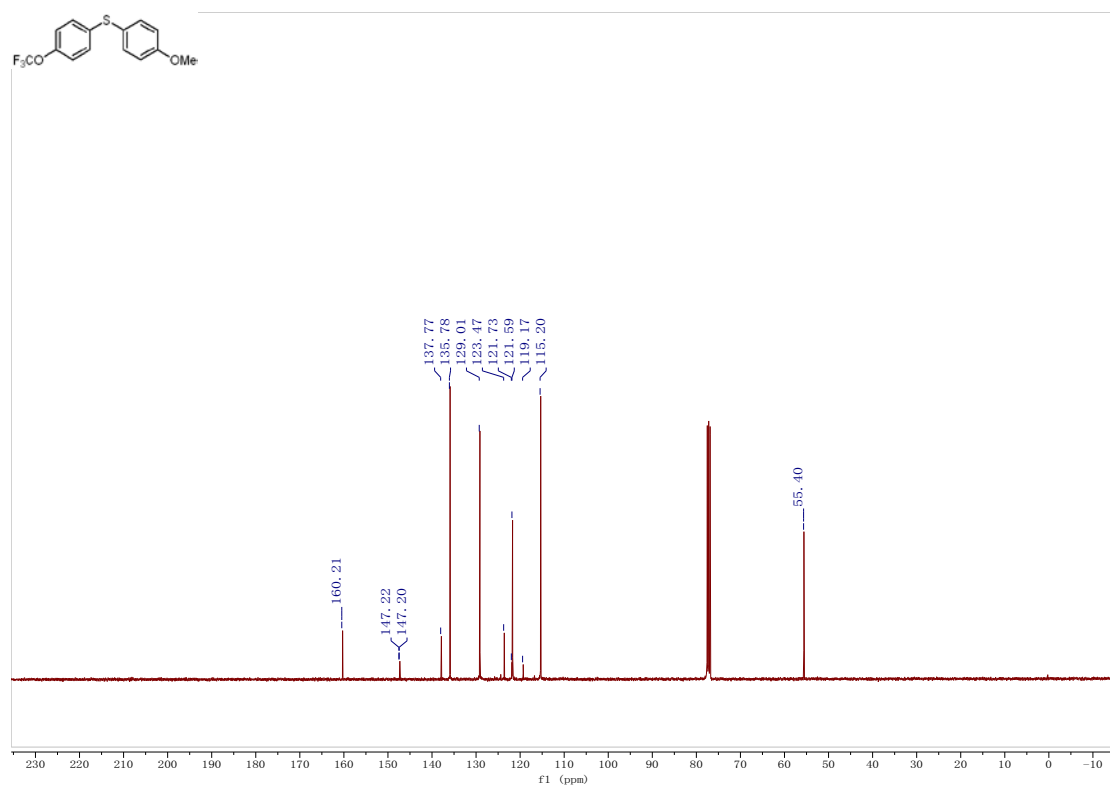

$^{13}\text{F}$  NMR Spectrum of **3i** (376 MHz,  $\text{CDCl}_3$ )

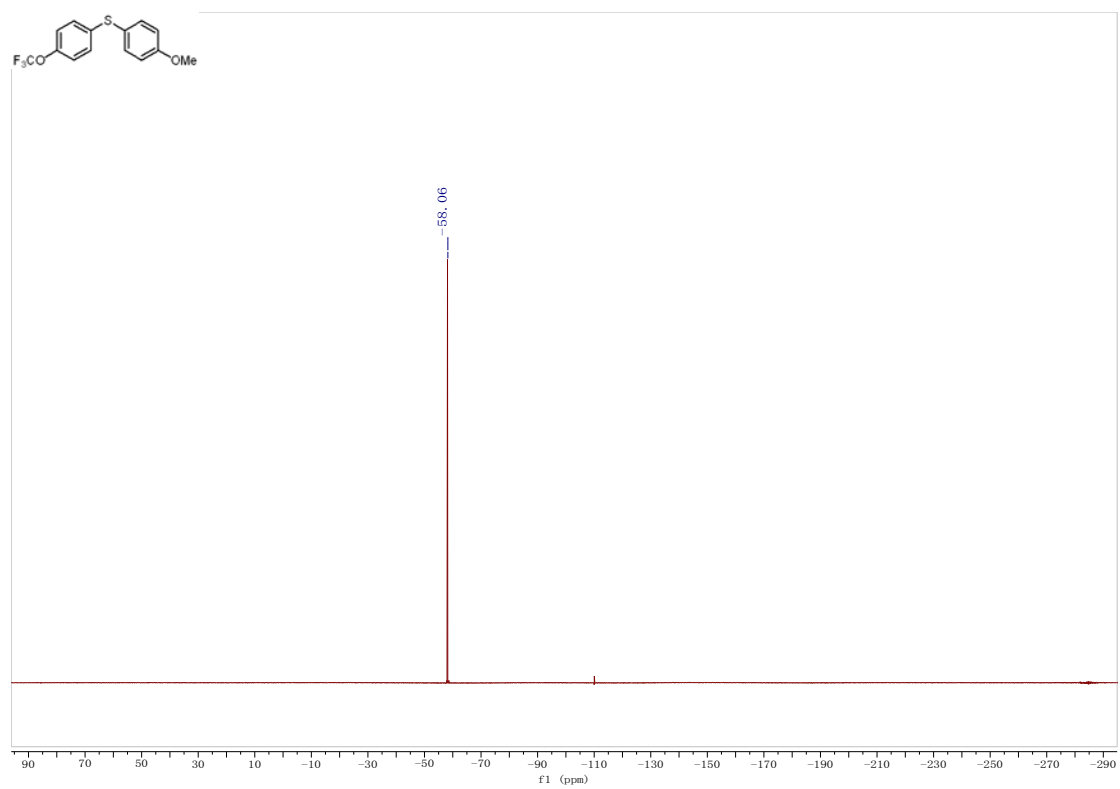



<sup>1</sup>H NMR Spectrum of **3bf** (400 MHz, CDCl<sub>3</sub>)

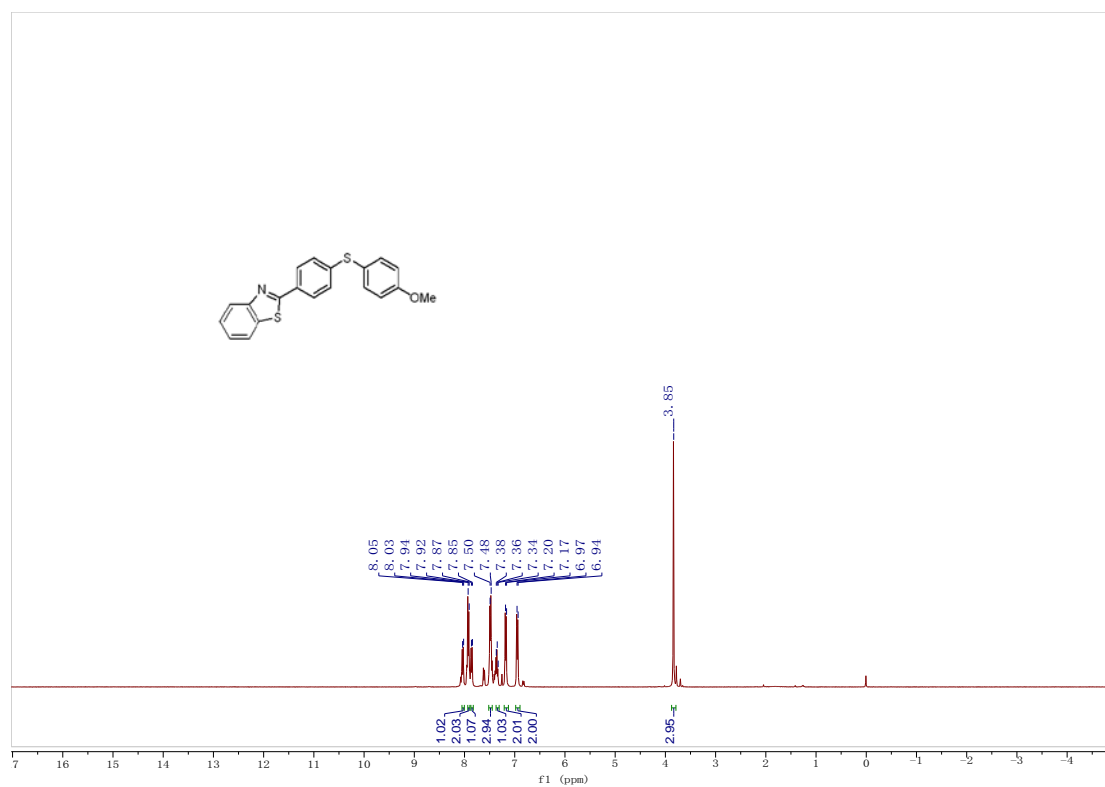

<sup>13</sup>C NMR Spectrum of **3bf** (101 MHz, CDCl<sub>3</sub>)

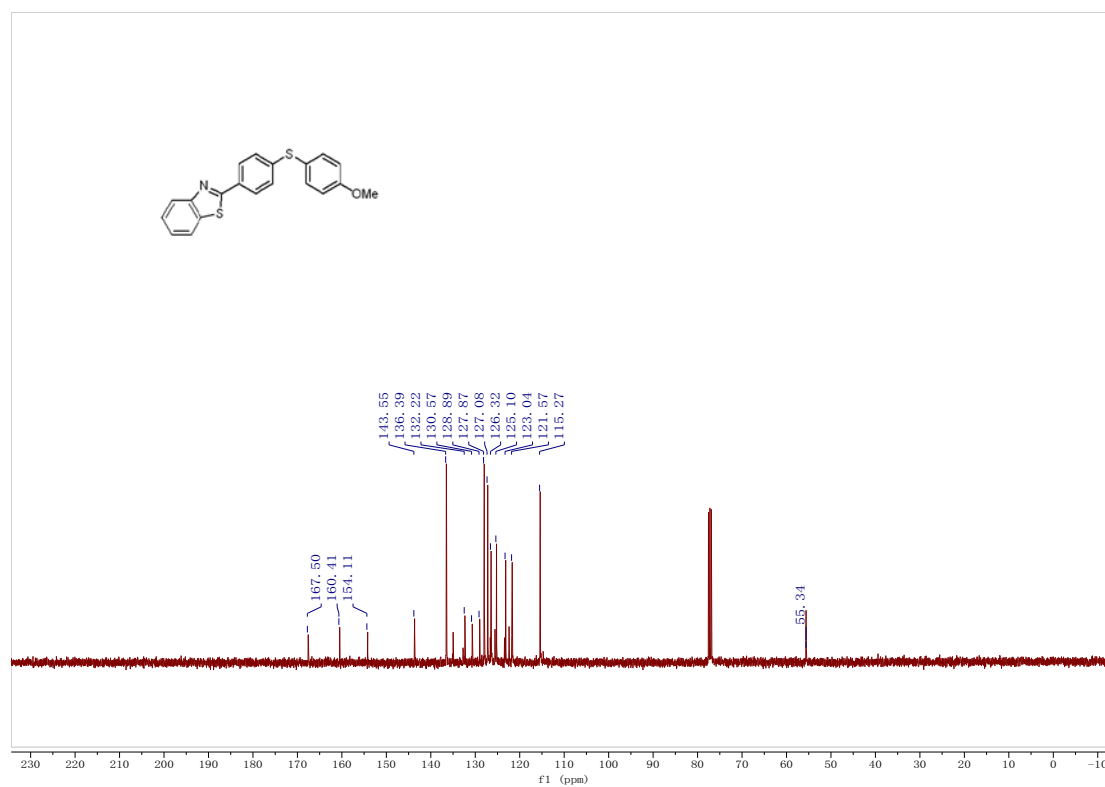

$^1\text{H}$  NMR Spectrum of **3bg** (500 MHz,  $\text{CDCl}_3$ )

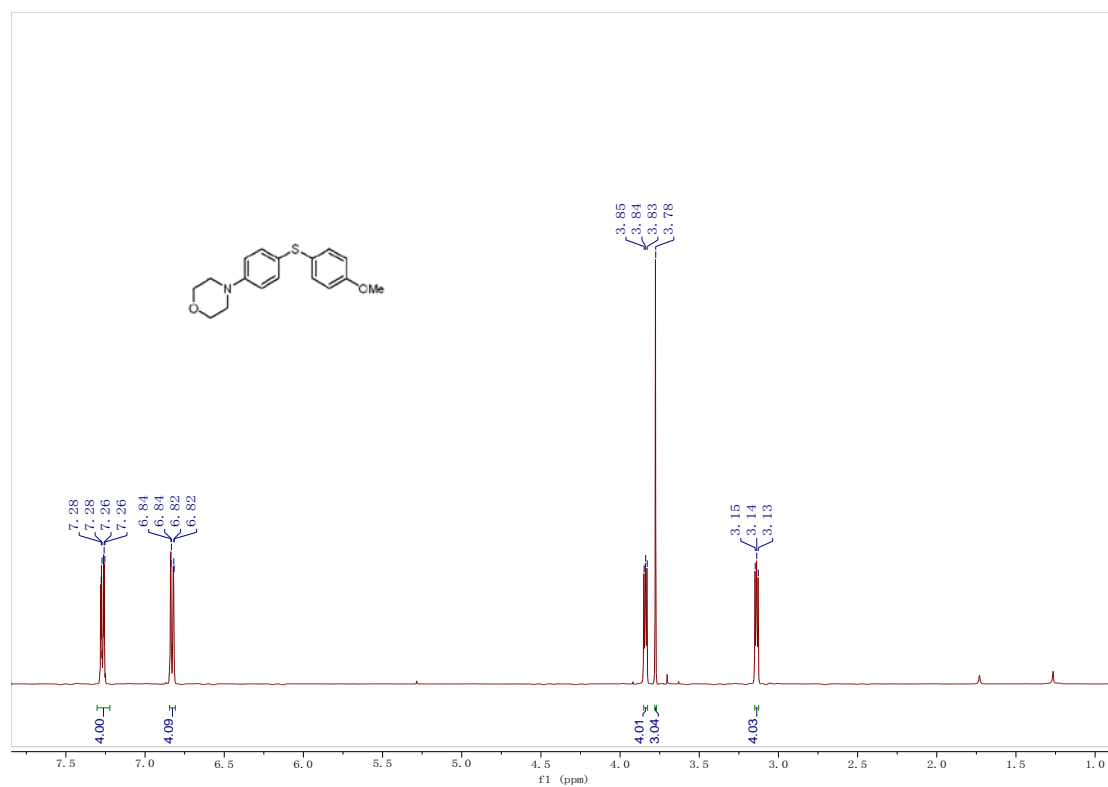

$^{13}\text{C}$  NMR Spectrum of **3bg** (126 MHz,  $\text{CDCl}_3$ )

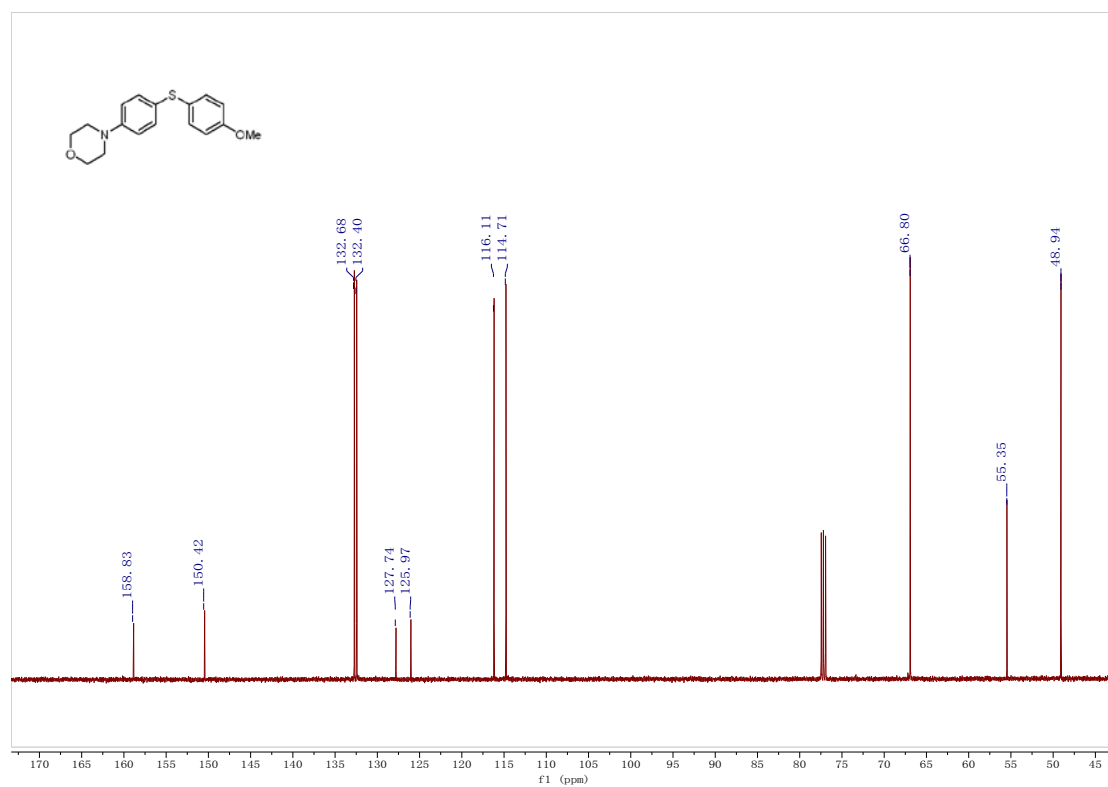

<sup>1</sup>H NMR Spectrum of **3bh** (400 MHz, CDCl<sub>3</sub>)

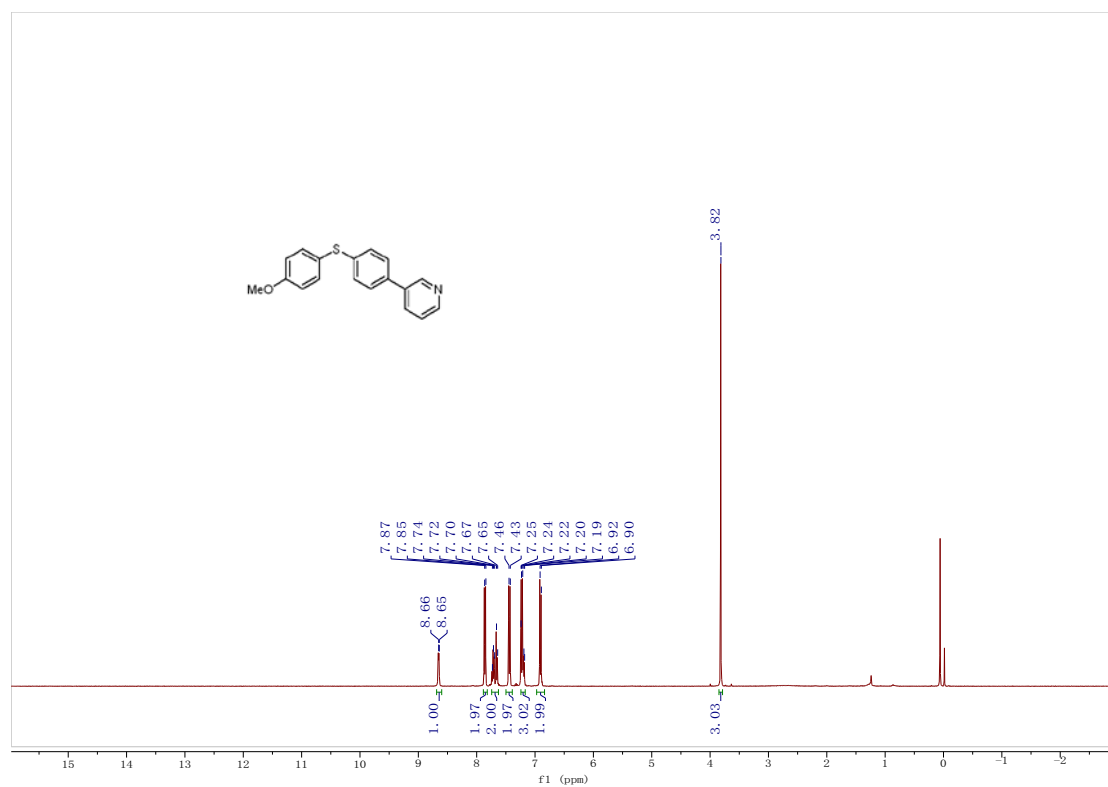

<sup>13</sup>C NMR Spectrum of **3bh** (101 MHz, CDCl<sub>3</sub>)

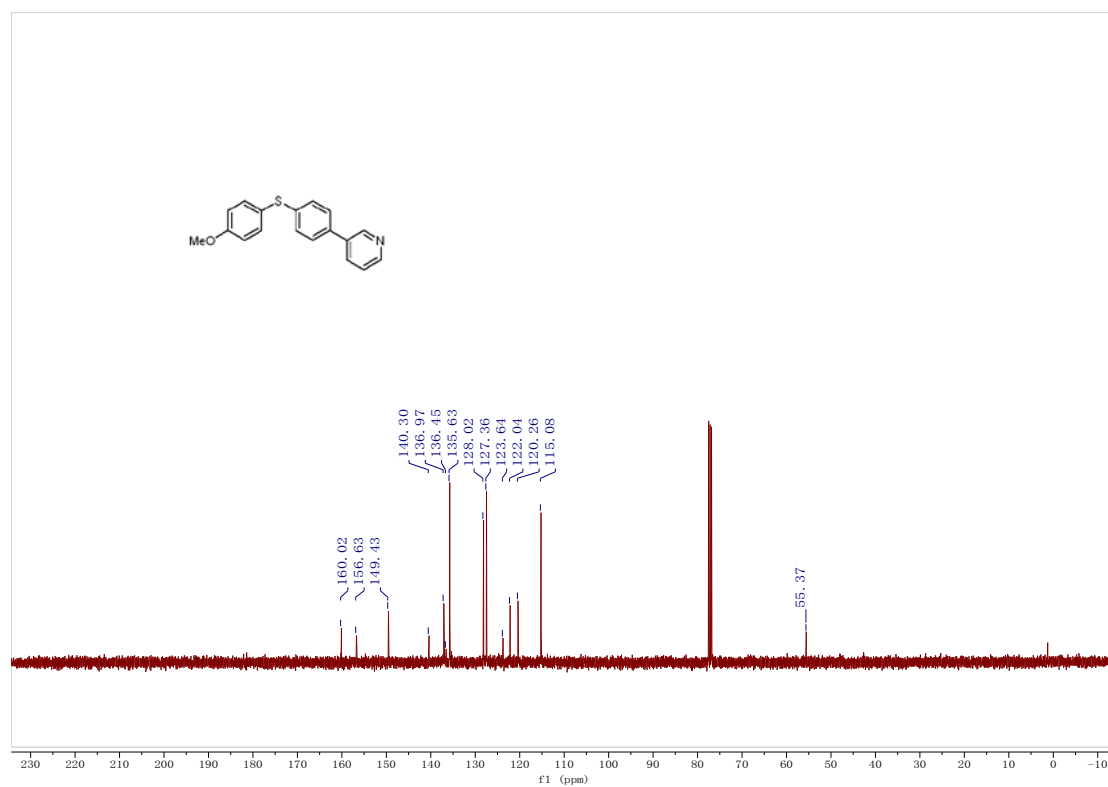

<sup>1</sup>H NMR Spectrum of **3bi** (500 MHz, CDCl<sub>3</sub>)

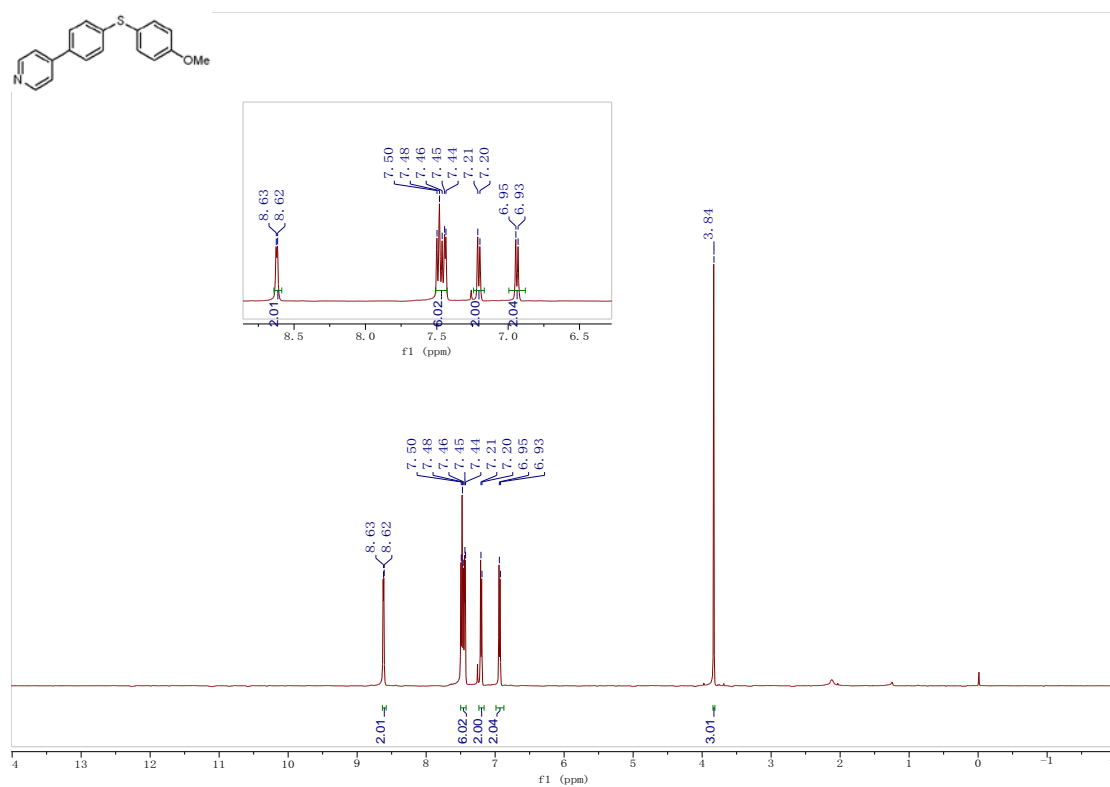

<sup>13</sup>C NMR Spectrum of **3bi** (126 MHz, CDCl<sub>3</sub>)

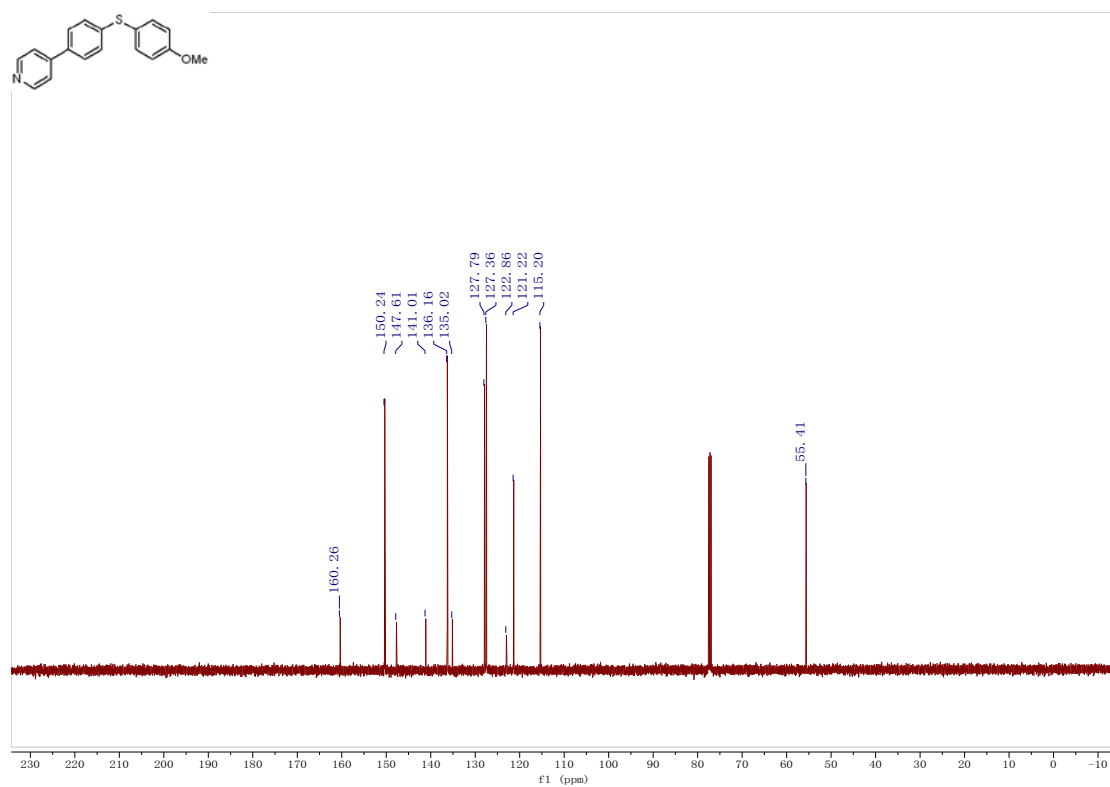

### <sup>1</sup>H NMR Spectrum of **3bj** (500 MHz, CDCl<sub>3</sub>)

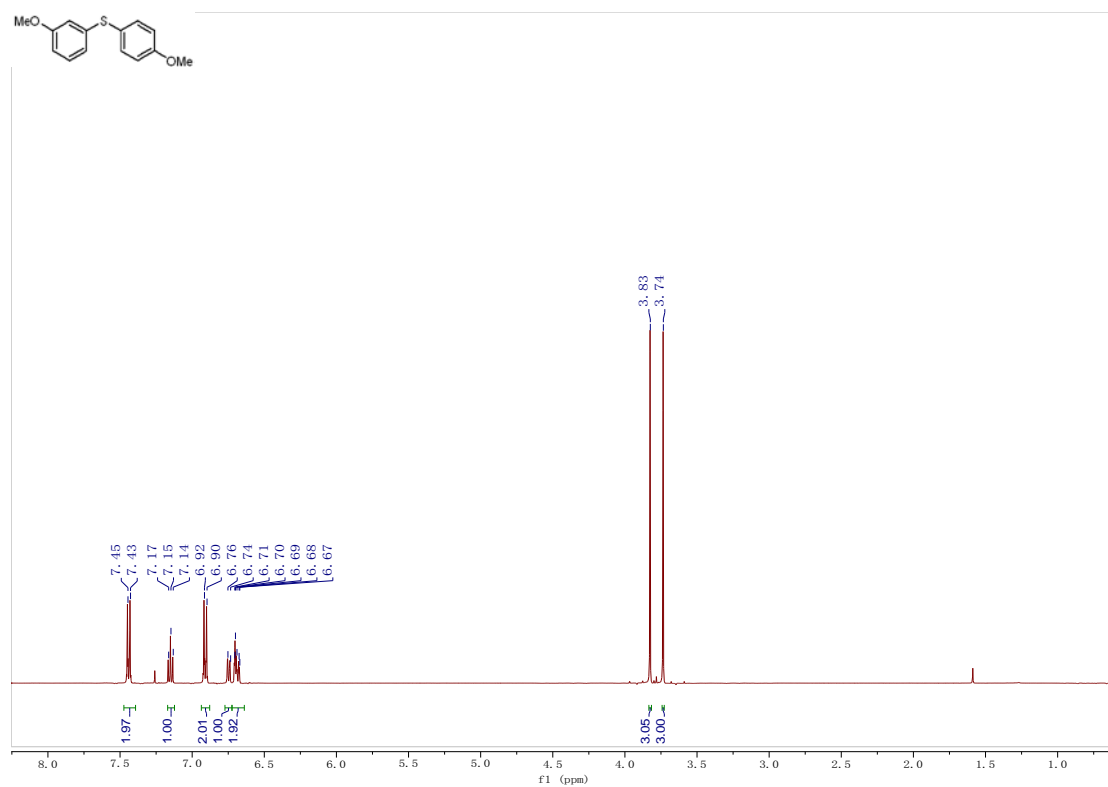

### <sup>13</sup>C NMR Spectrum of **3bj** (101 MHz, CDCl<sub>3</sub>)

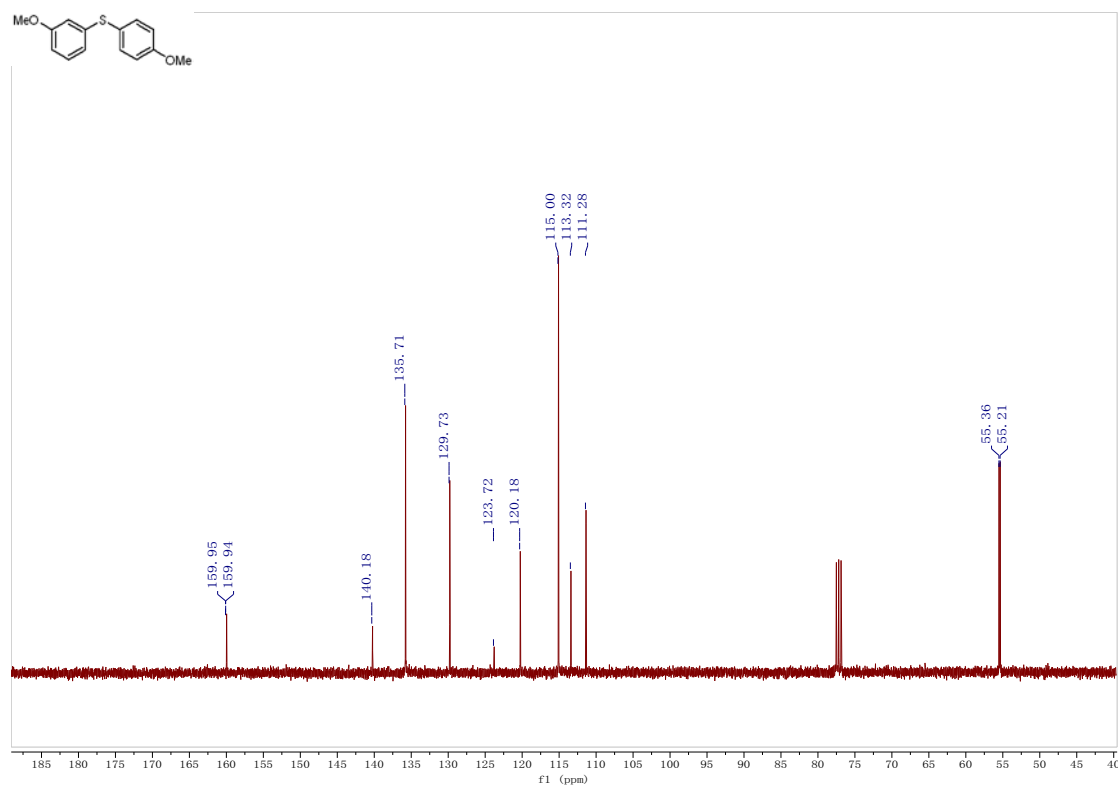

<sup>1</sup>H NMR Spectrum of **3bk** (500 MHz, CDCl<sub>3</sub>)

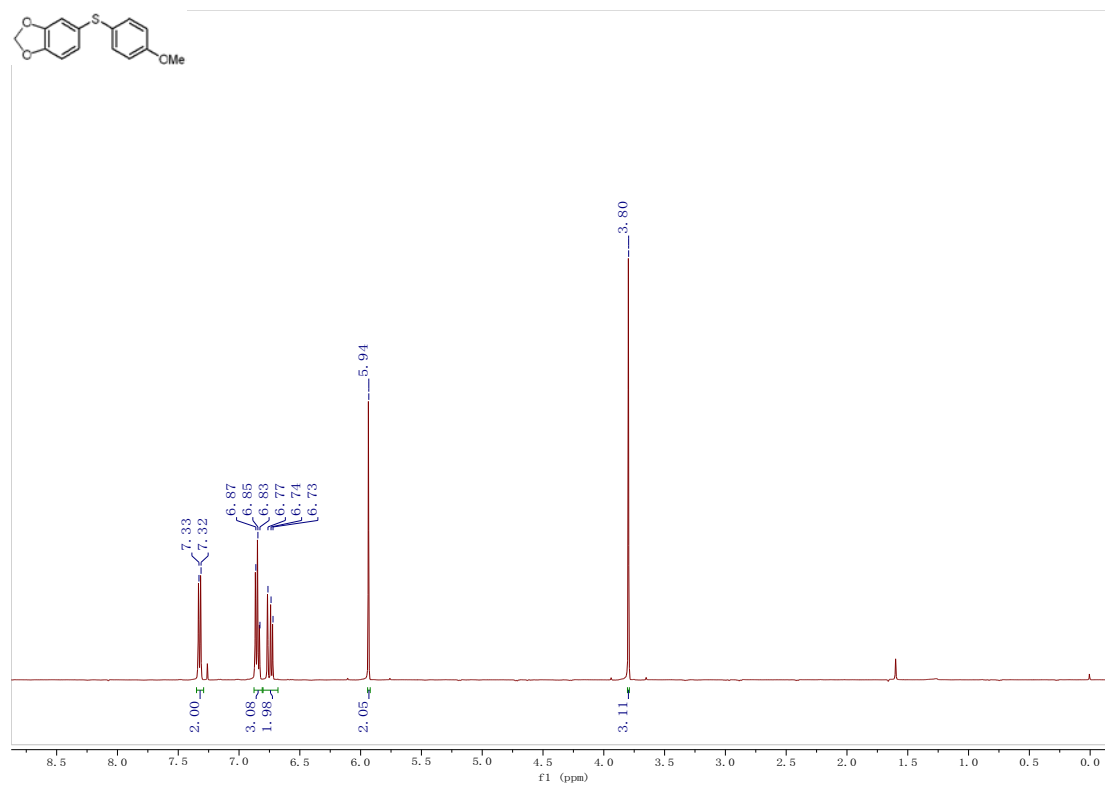

<sup>13</sup>C NMR Spectrum of **3bk** (126 MHz, CDCl<sub>3</sub>)

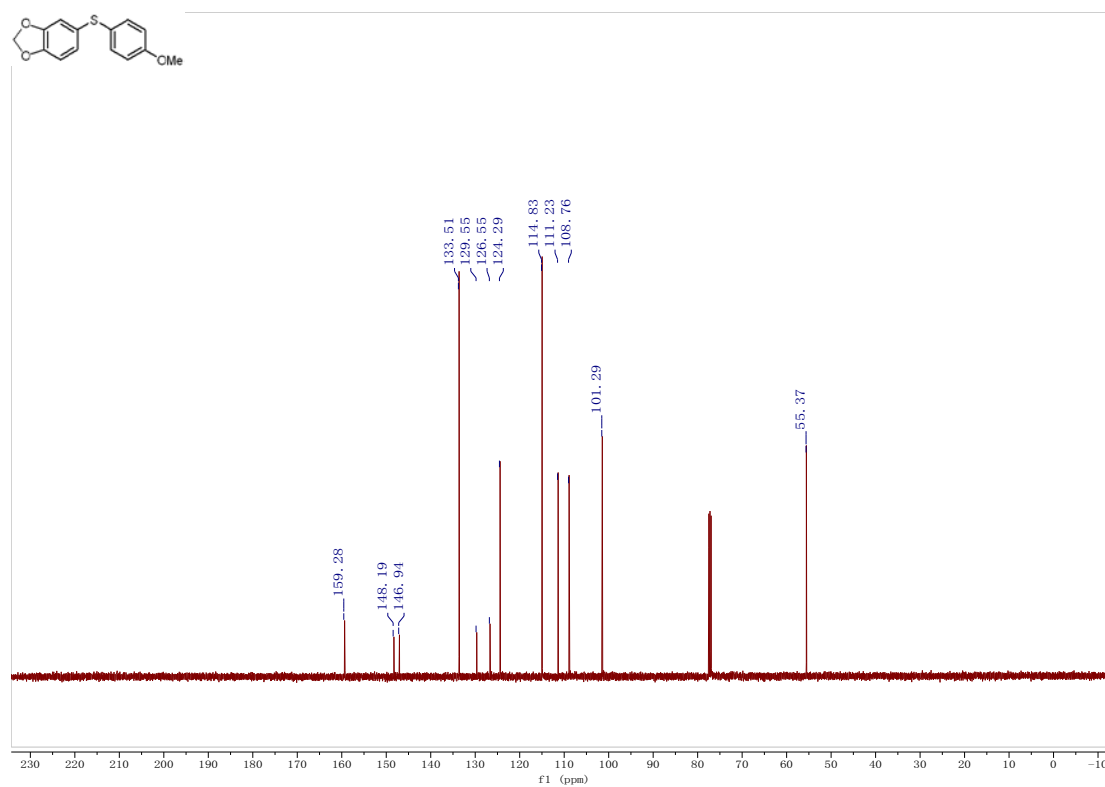

<sup>1</sup>H NMR Spectrum of **3bl** (400 MHz, CDCl<sub>3</sub>)

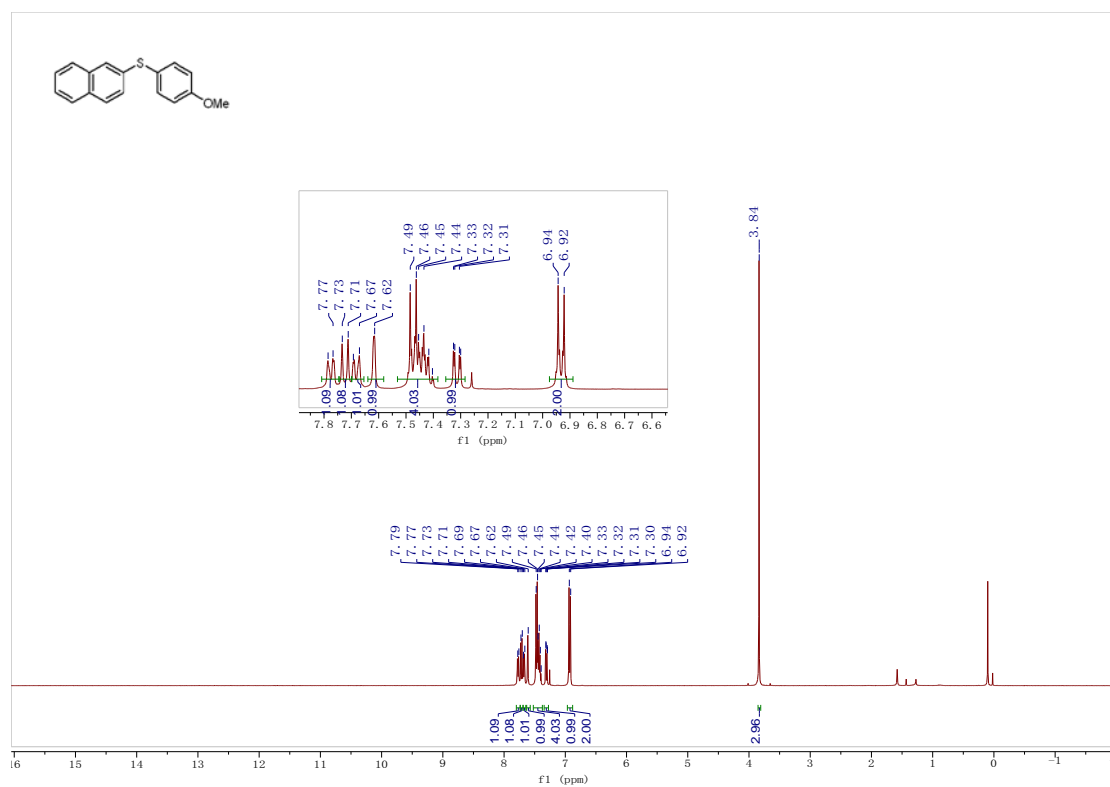

<sup>13</sup>C NMR Spectrum of **3bl** (101 MHz, CDCl<sub>3</sub>)

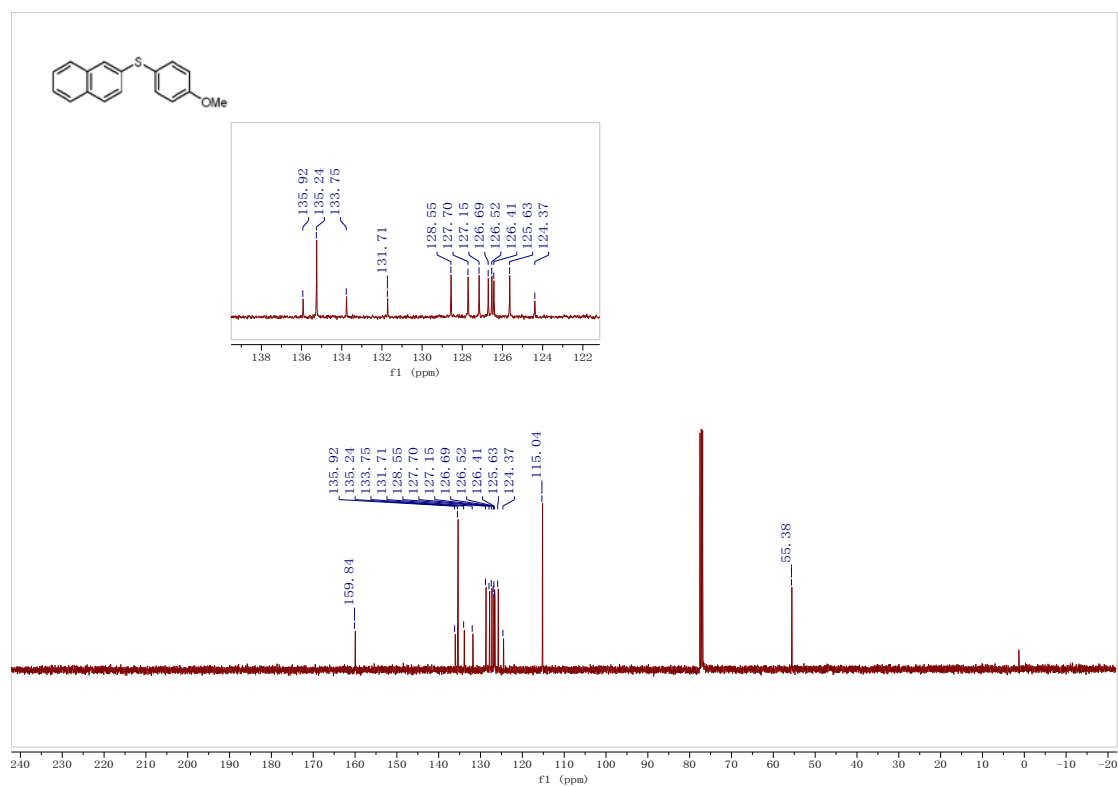

<sup>1</sup>H NMR Spectrum of **3bm** (500 MHz, CDCl<sub>3</sub>)

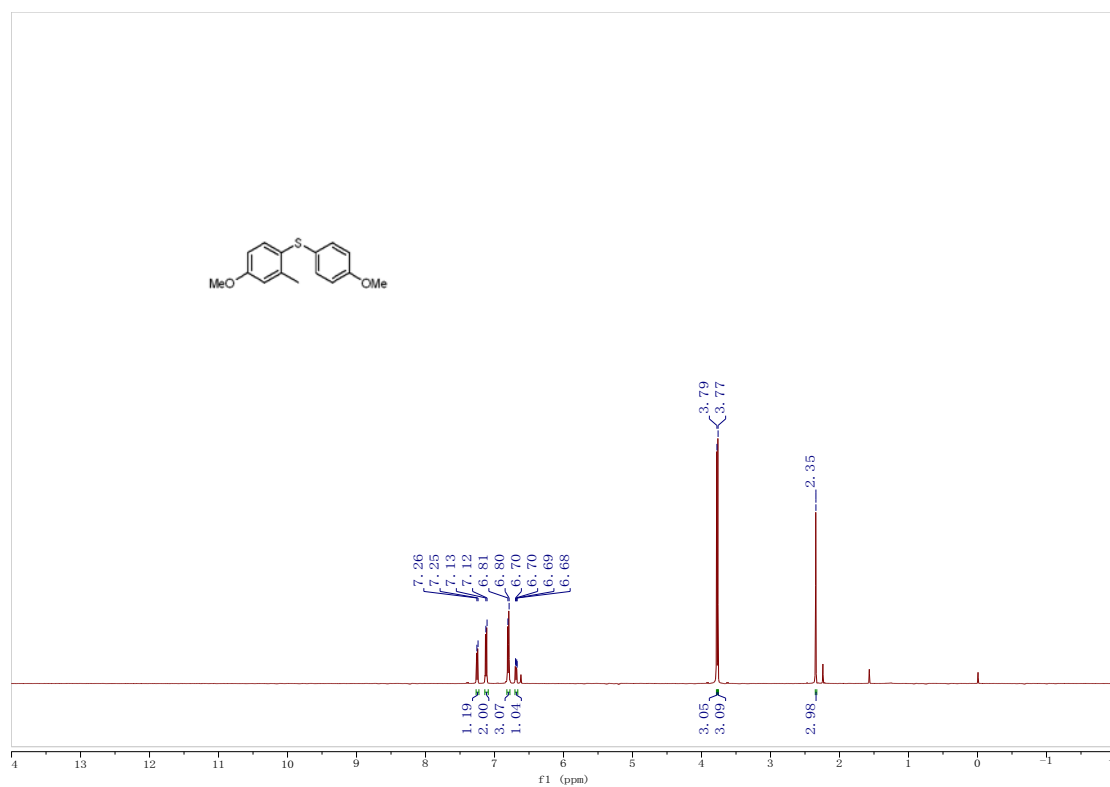

<sup>13</sup>C NMR Spectrum of **3bm** (126 MHz, CDCl<sub>3</sub>)

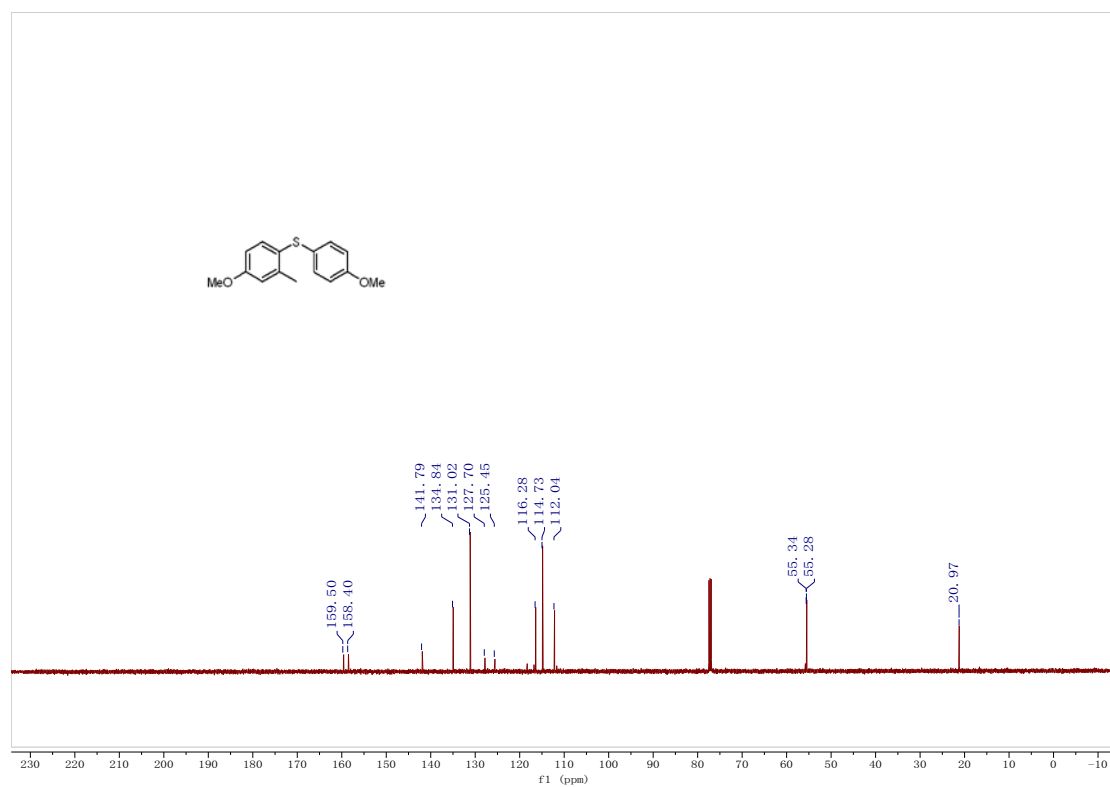



$^1\text{H}$  NMR Spectrum of **3bn** (500 MHz,  $\text{CDCl}_3$ )

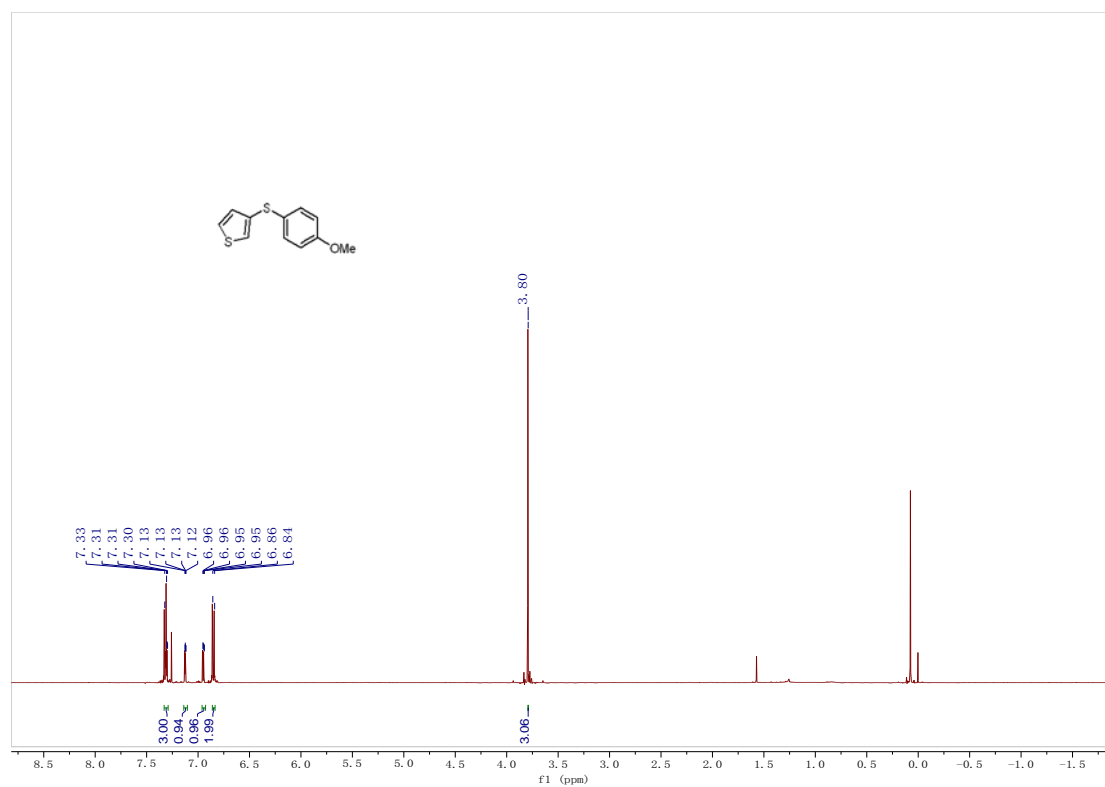

$^{13}\text{C}$  NMR Spectrum of **3bn** (101 MHz,  $\text{CDCl}_3$ )

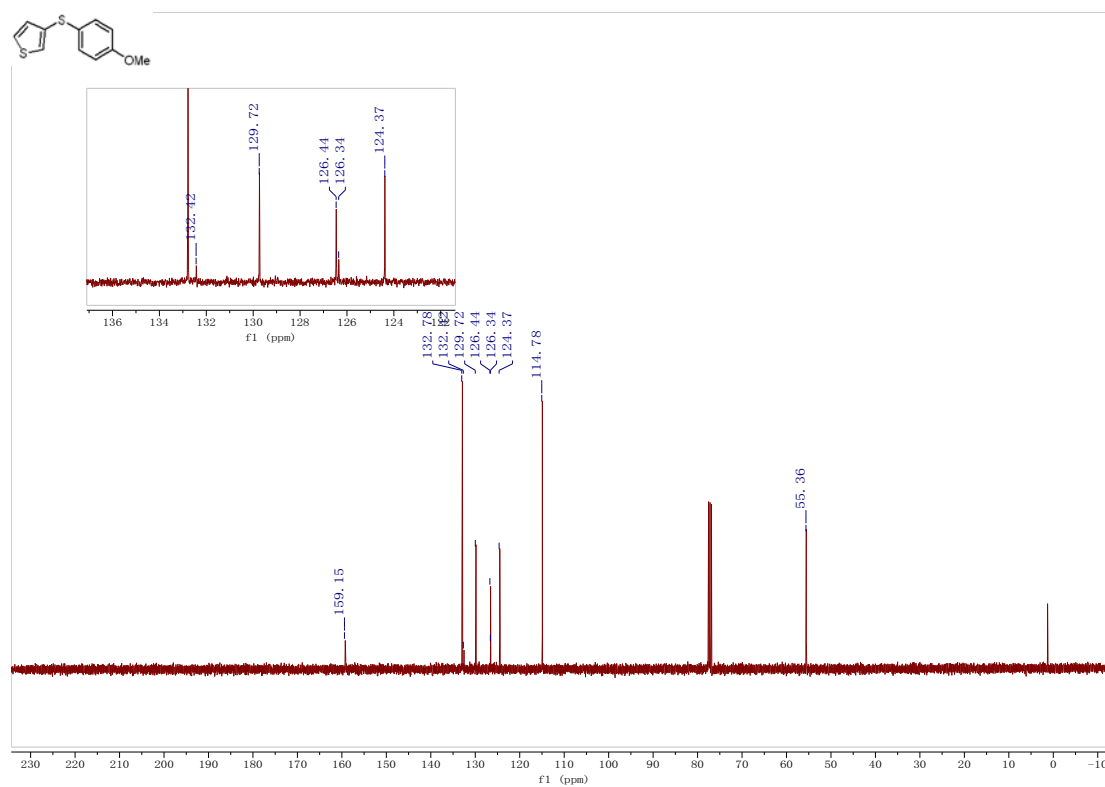

<sup>1</sup>H NMR Spectrum of **3bo** (500 MHz, CDCl<sub>3</sub>)

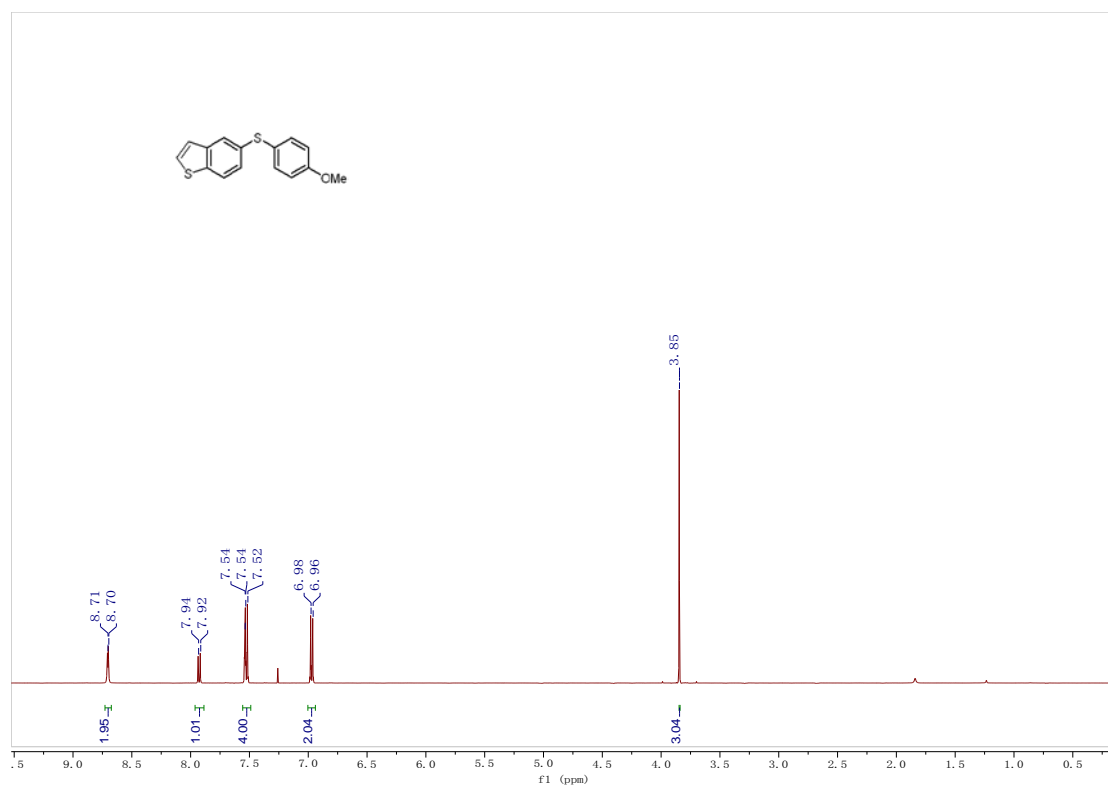

<sup>13</sup>C NMR Spectrum of **3bo** (126 MHz, CDCl<sub>3</sub>)

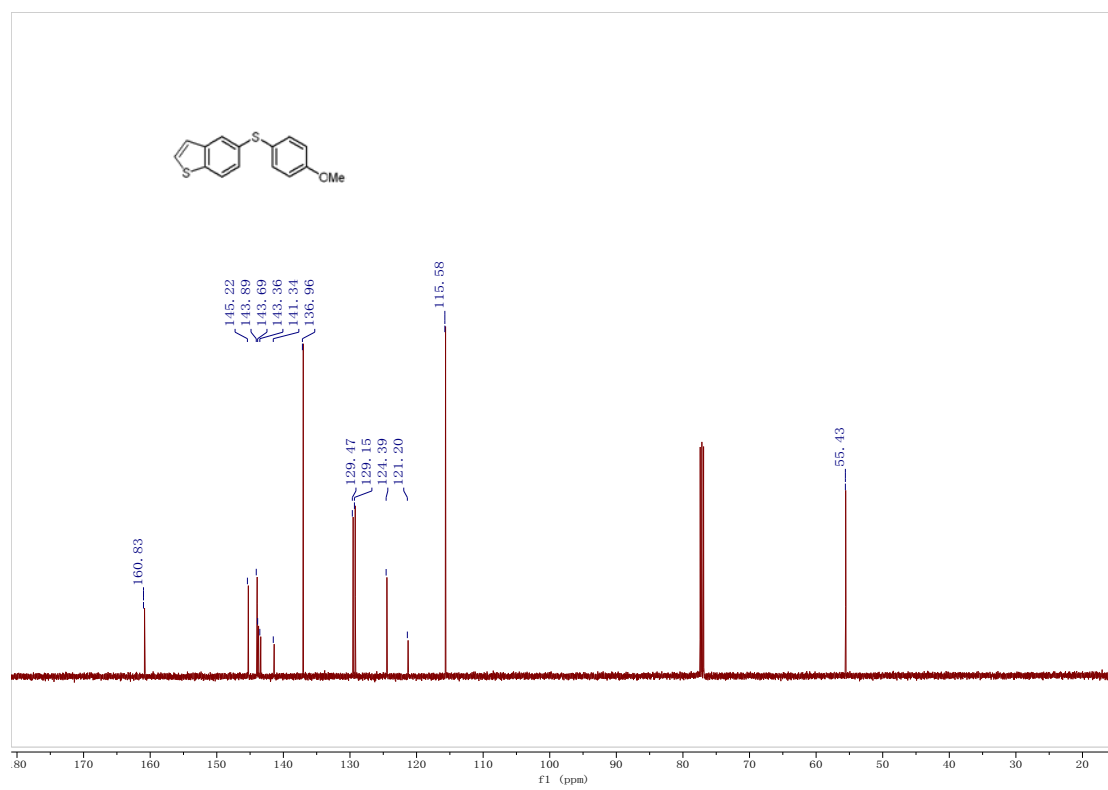

### $^1\text{H}$ NMR Spectrum of **3bp** (500 MHz, $\text{CDCl}_3$ )

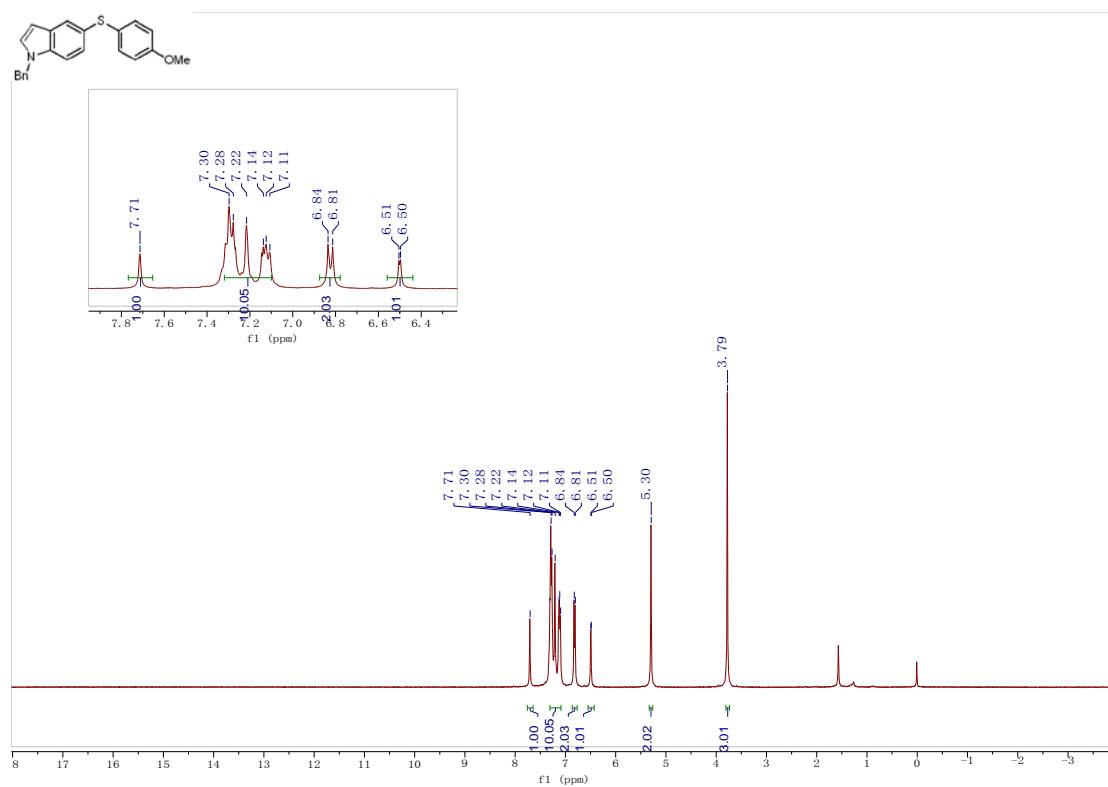

### $^{13}\text{C}$ NMR Spectrum of **3bp** (101 MHz, $\text{CDCl}_3$ )

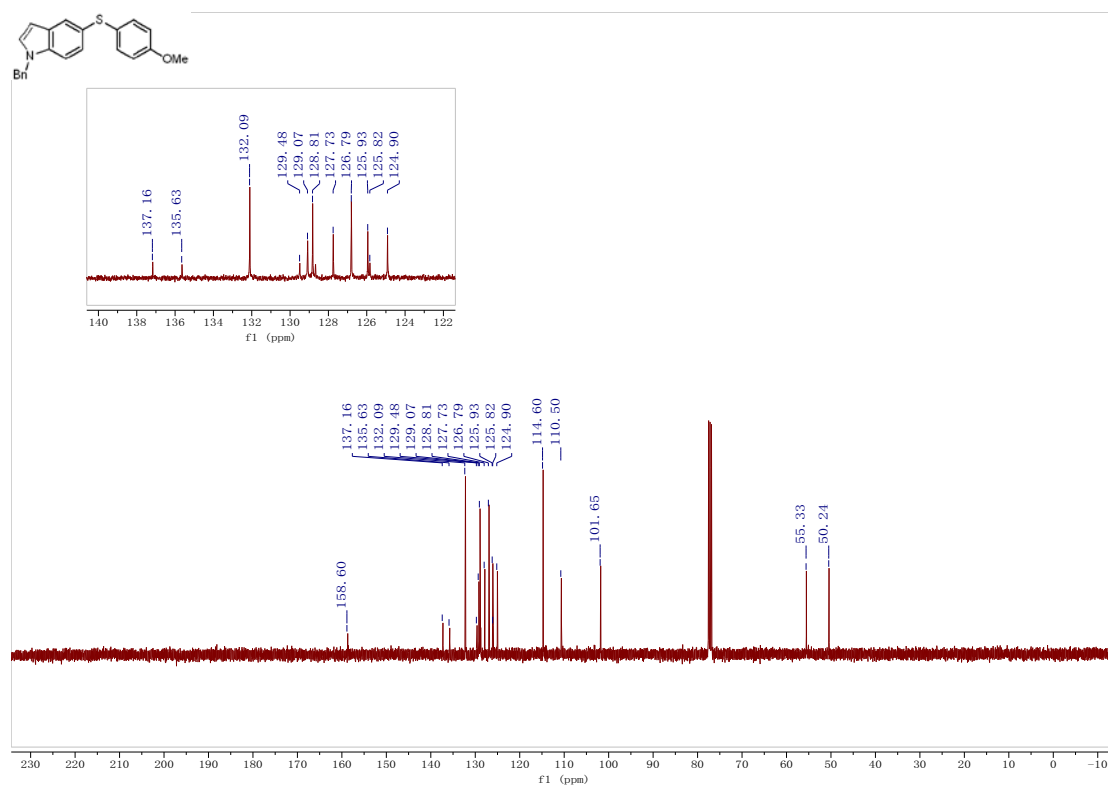

<sup>1</sup>H NMR Spectrum of **3bq** (500 MHz, DMSO-*d*<sub>6</sub>)

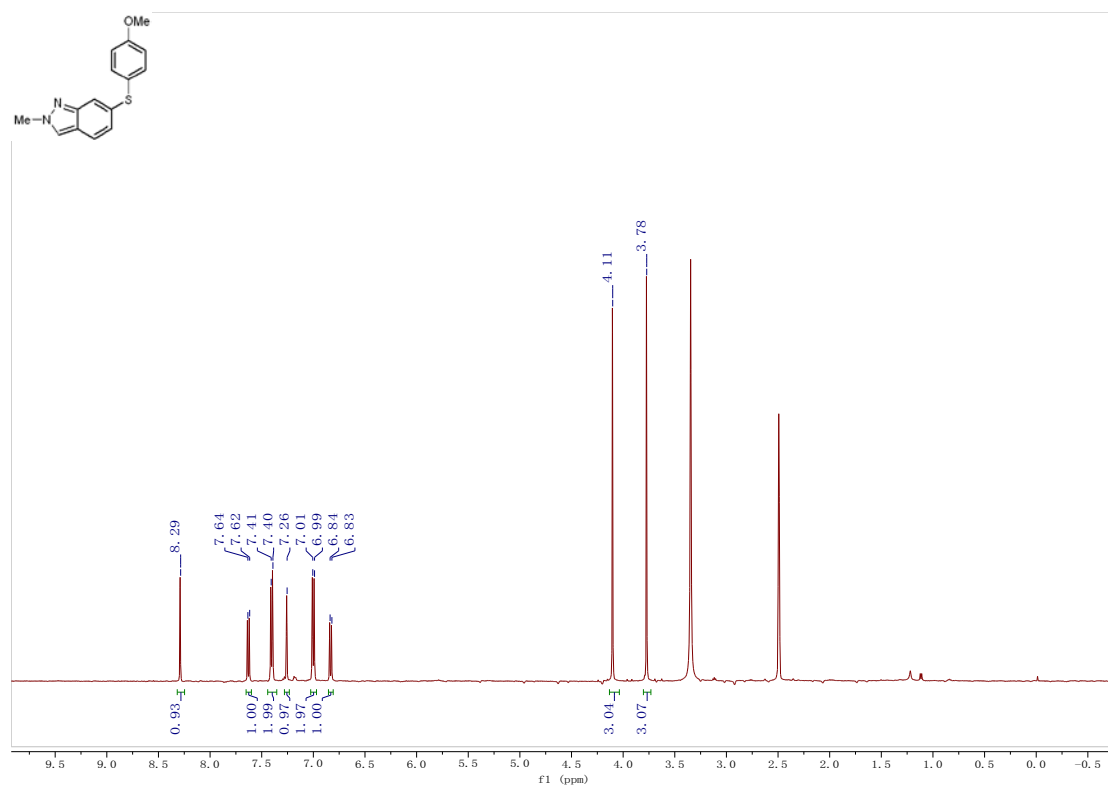

<sup>13</sup>C NMR Spectrum of **3bq** (126 MHz, DMSO-*d*<sub>6</sub>)

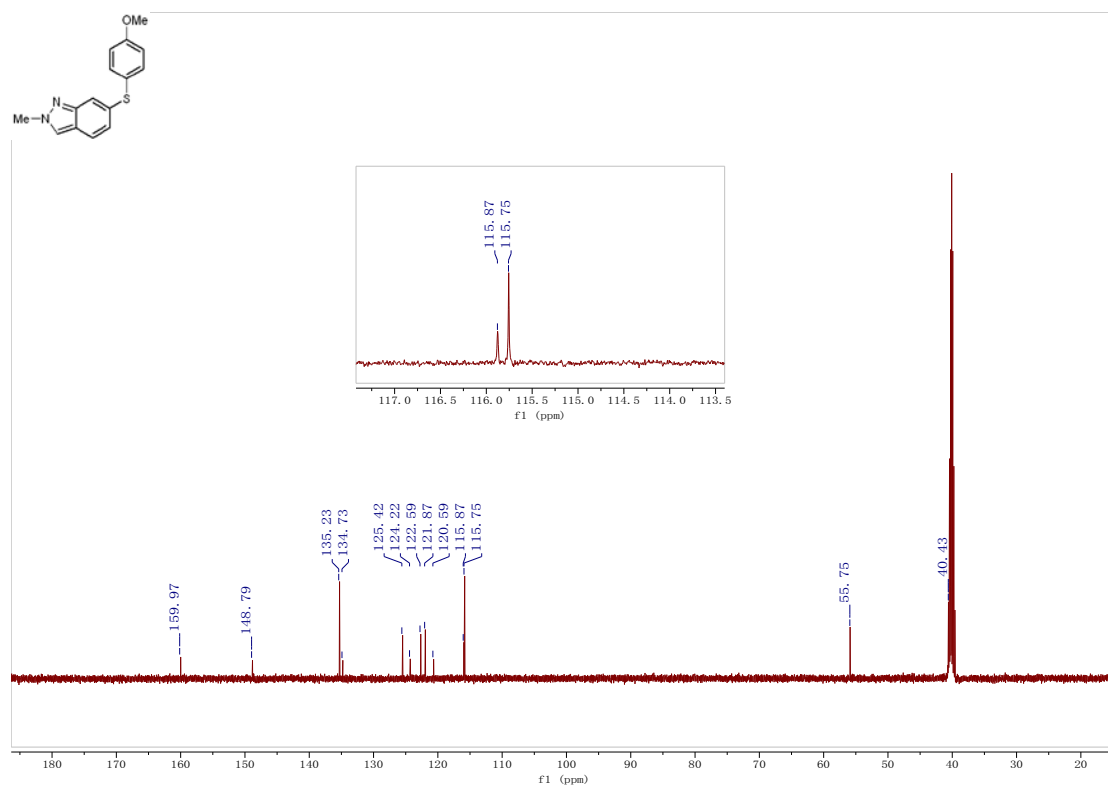

<sup>1</sup>H NMR Spectrum of **3br** (500 MHz, CDCl<sub>3</sub>)

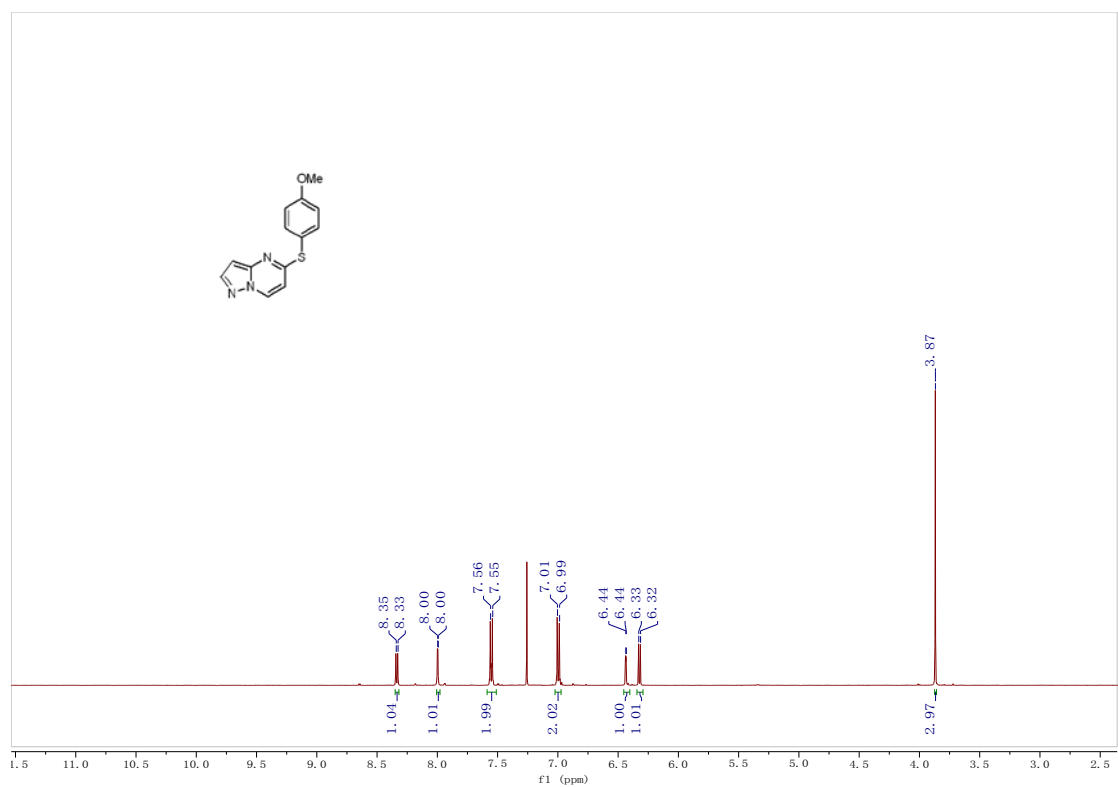

<sup>13</sup>C NMR Spectrum of **3br** (126 MHz, CDCl<sub>3</sub>)

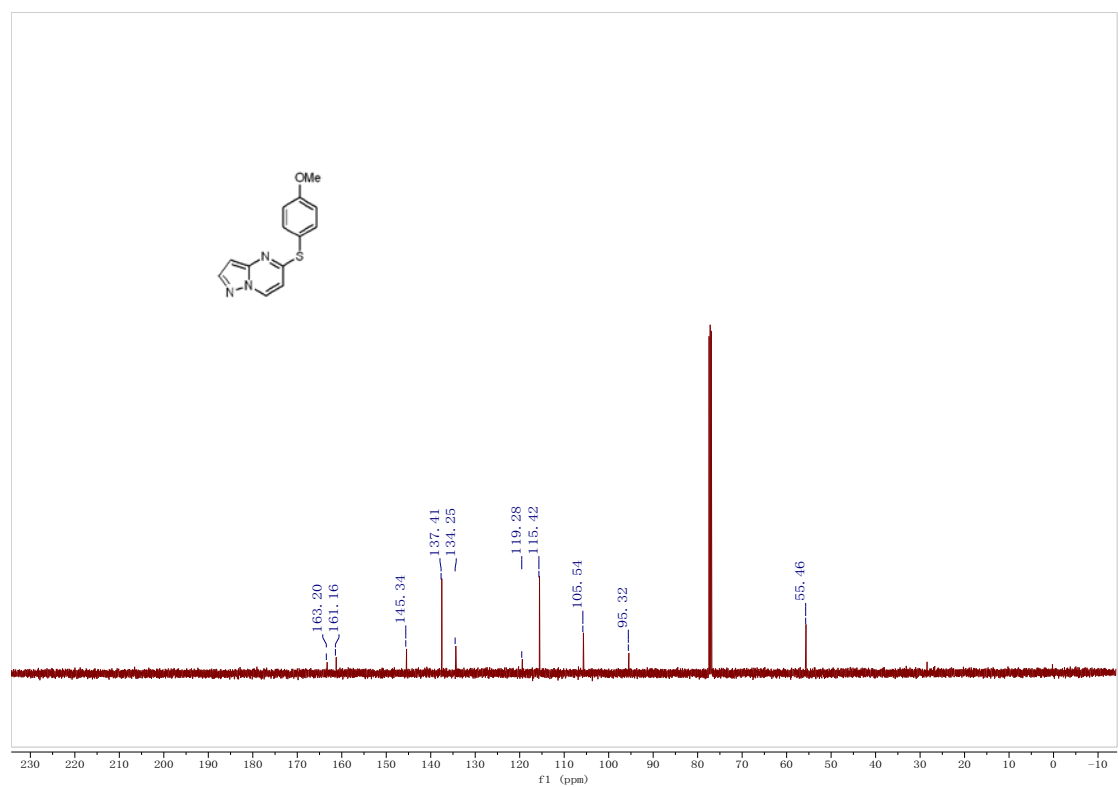

<sup>1</sup>H NMR Spectrum of **3bs** (400 MHz, CDCl<sub>3</sub>)

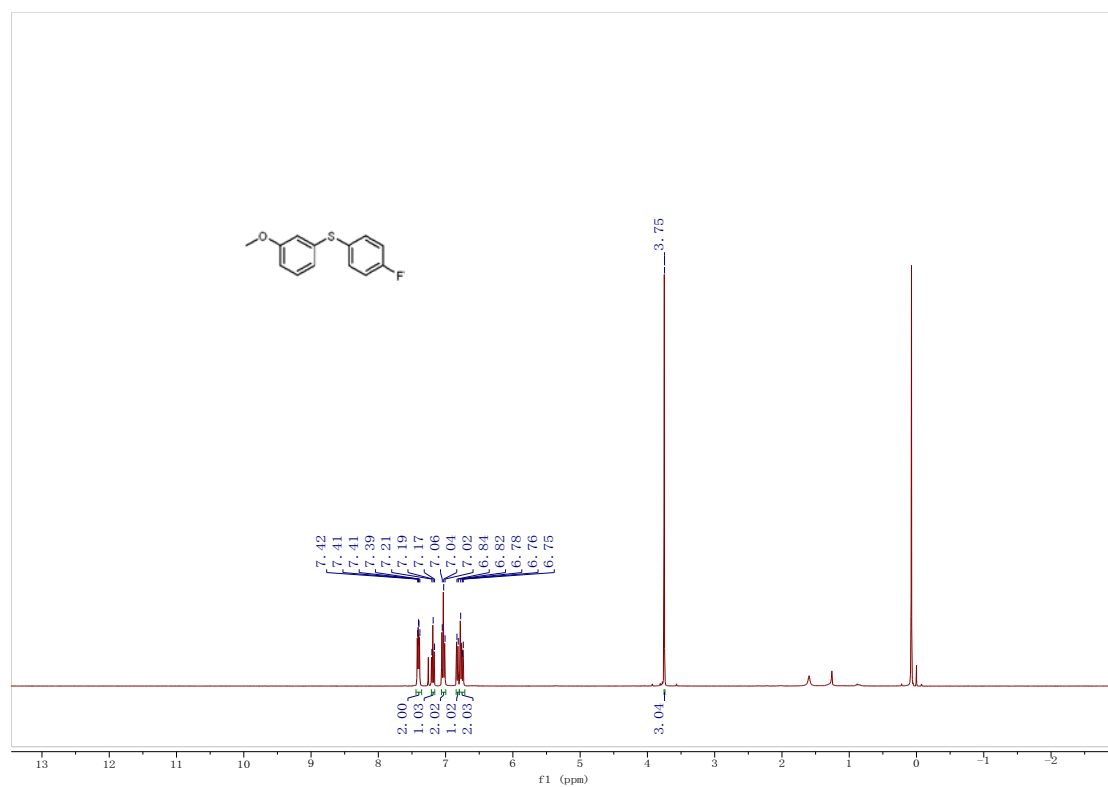

<sup>13</sup>C NMR Spectrum of **3bs** (101 MHz, CDCl<sub>3</sub>)

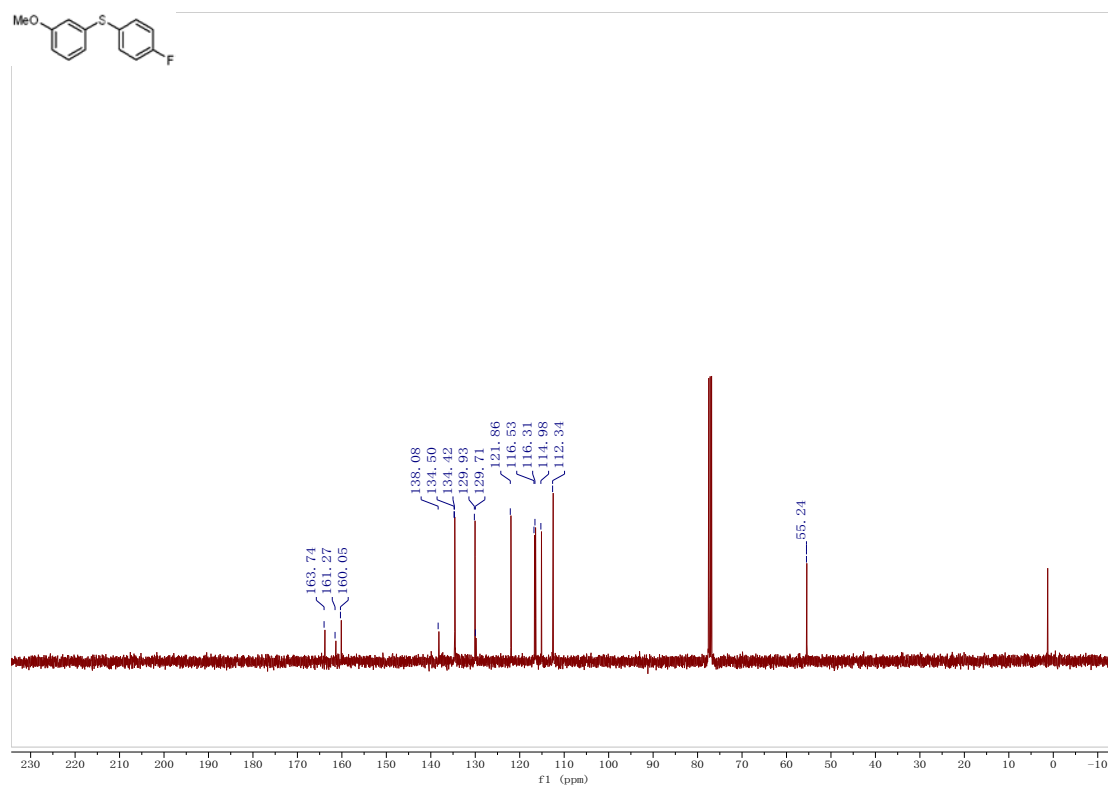

$^{19}\text{F}$  NMR Spectrum of **3bs** (376 MHz,  $\text{CDCl}_3$ )

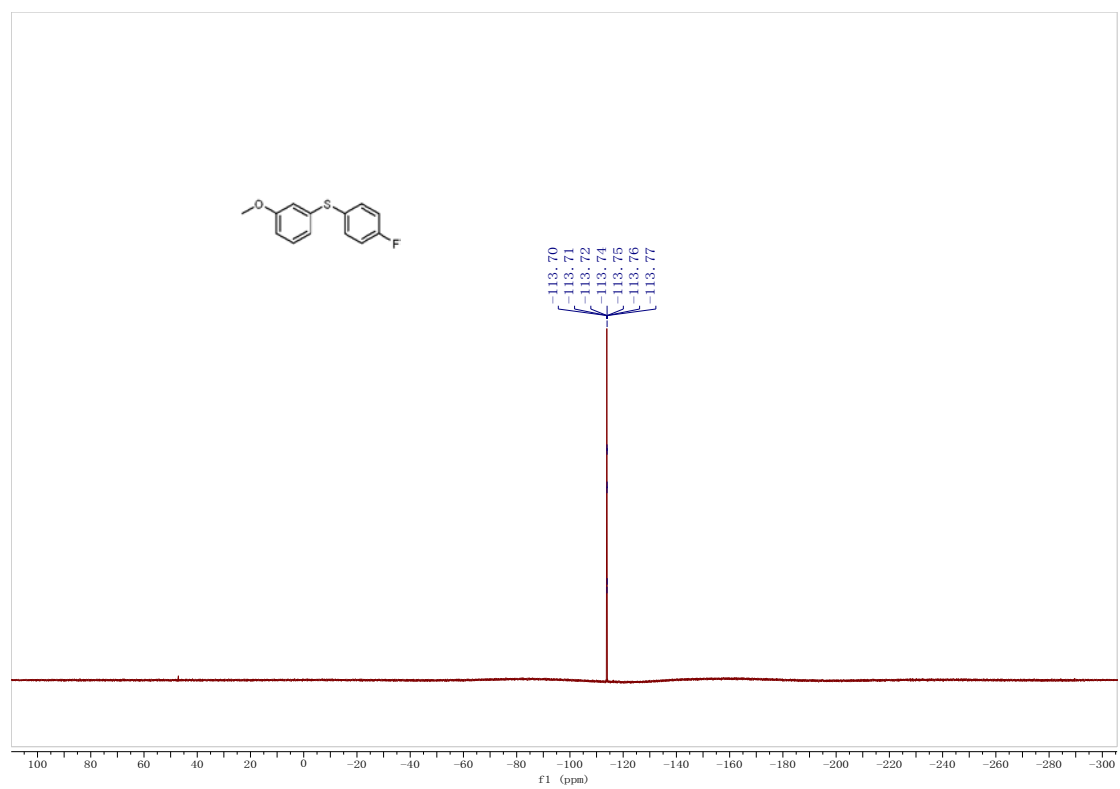

$^1\text{H}$  NMR Spectrum of **3bt** (500 MHz,  $\text{CDCl}_3$ )

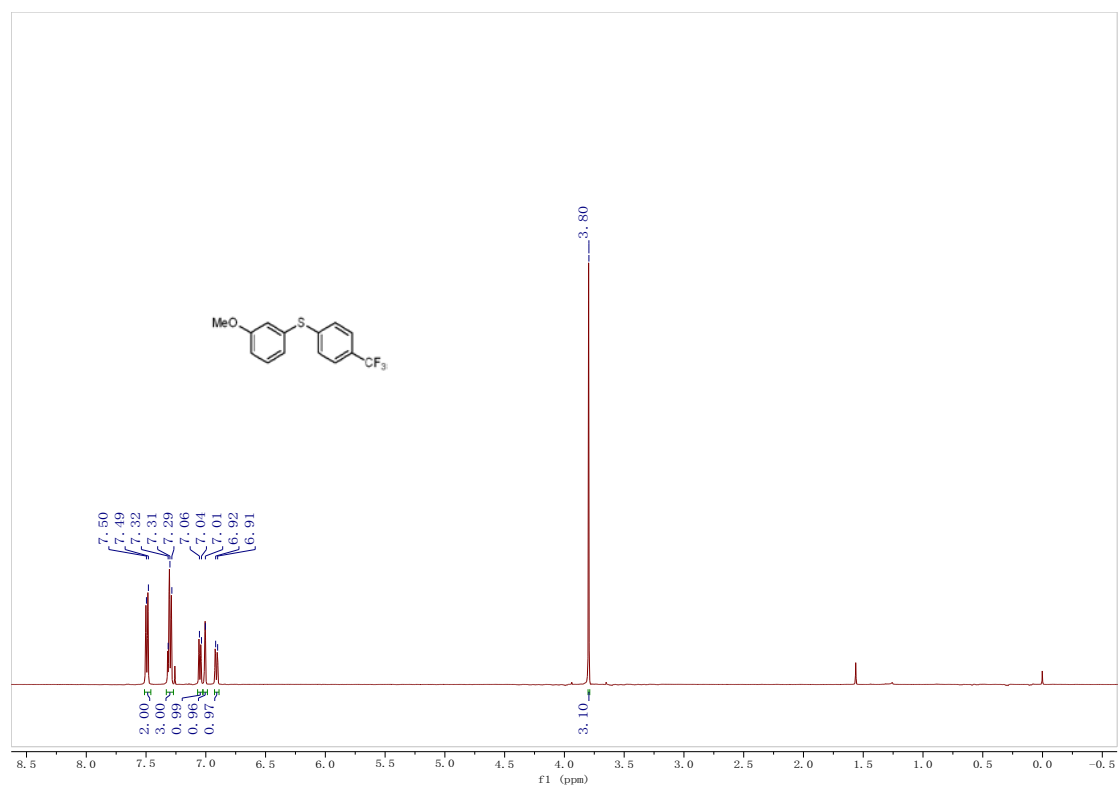

$^{13}\text{C}$  NMR Spectrum of **3bt** (126 MHz,  $\text{CDCl}_3$ )

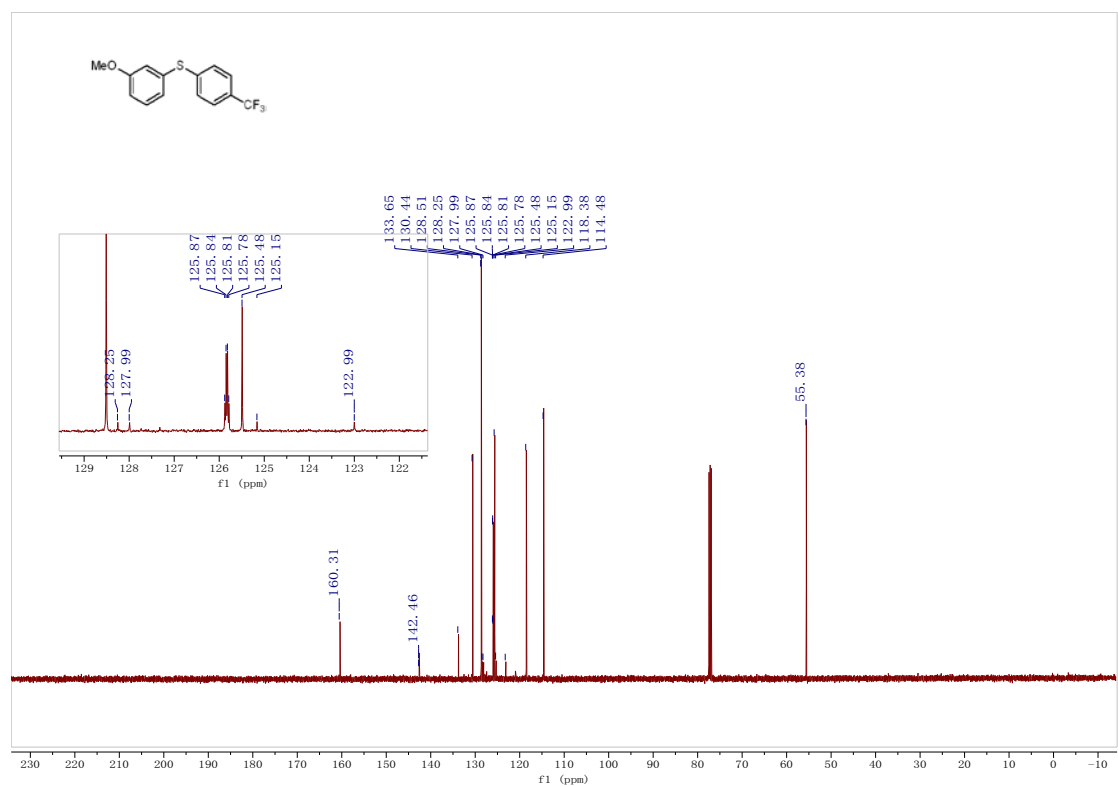



<sup>19</sup>F NMR Spectrum of **3bt** (376 MHz, CDCl<sub>3</sub>)

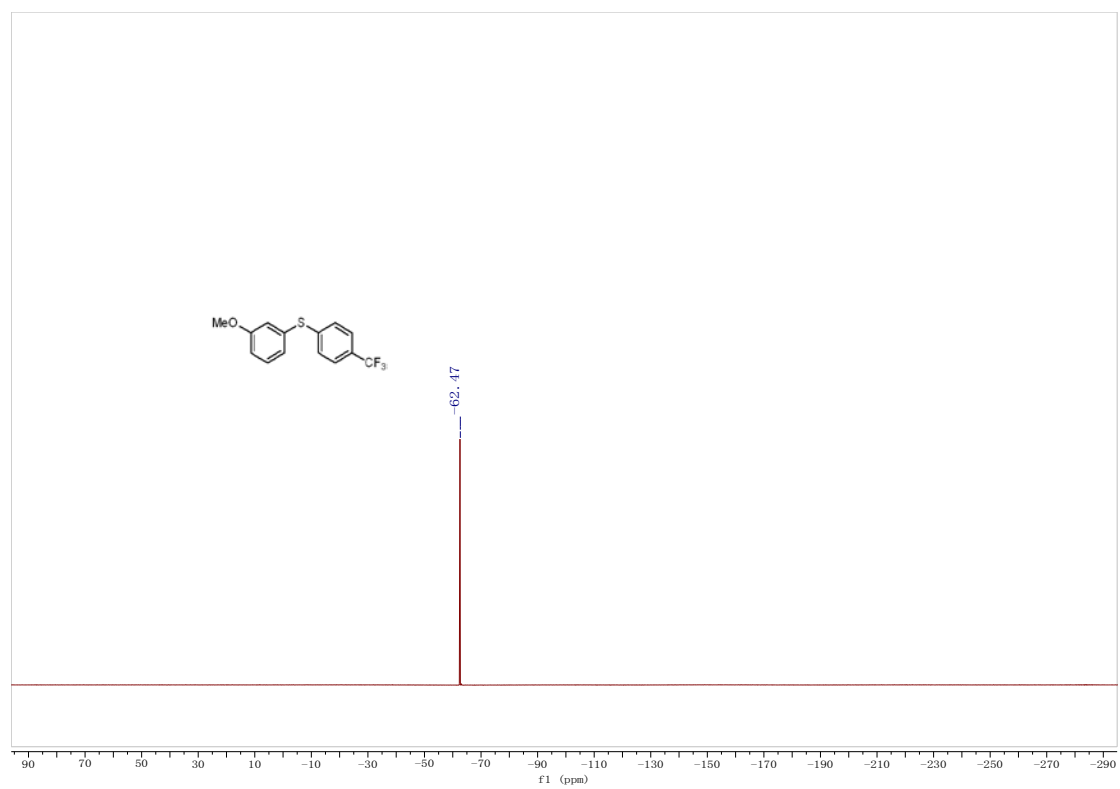

<sup>1</sup>H NMR Spectrum of **3bu** (400 MHz, CDCl<sub>3</sub>)

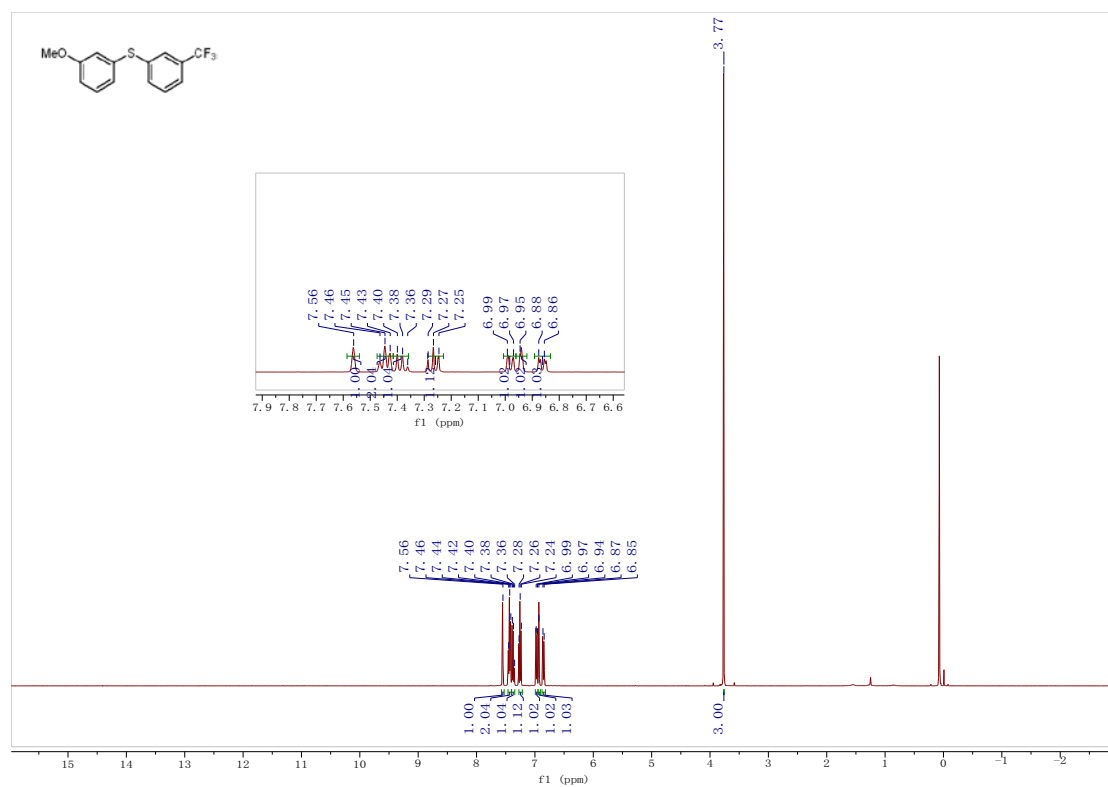

<sup>13</sup>C NMR Spectrum of **3bu** (101 MHz, CDCl<sub>3</sub>)

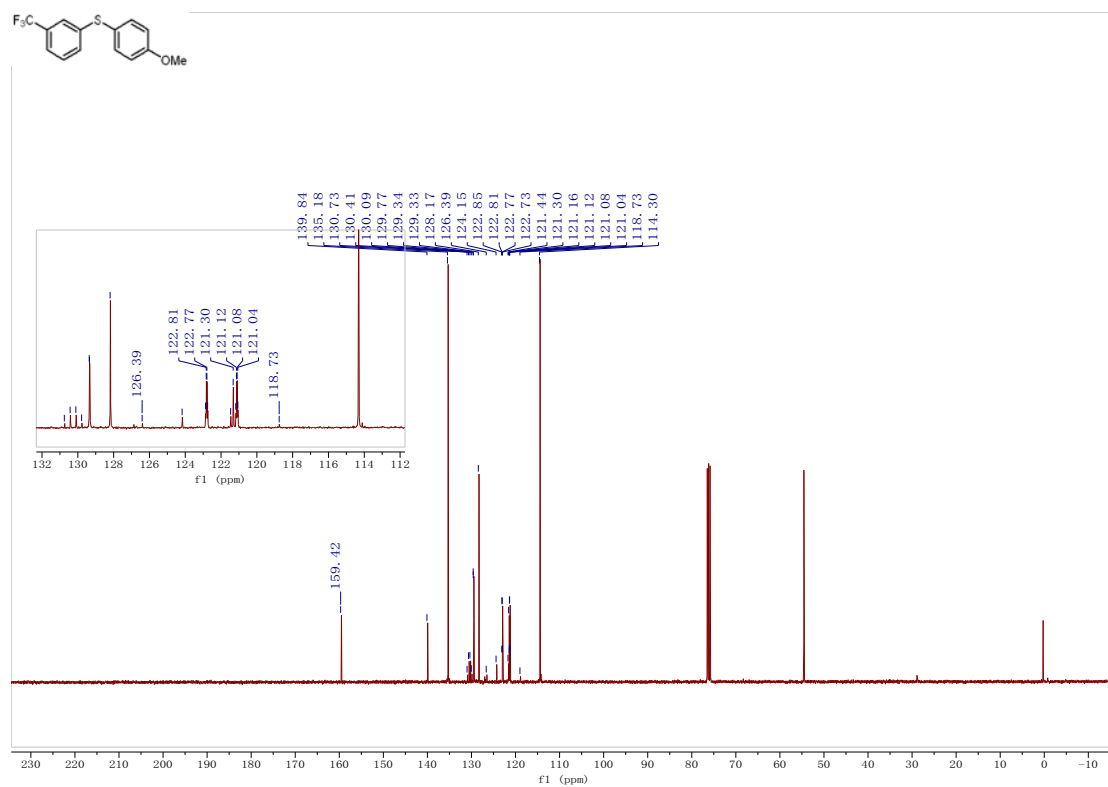

$^{19}\text{F}$  NMR Spectrum of **3bu** (376 MHz,  $\text{CDCl}_3$ )

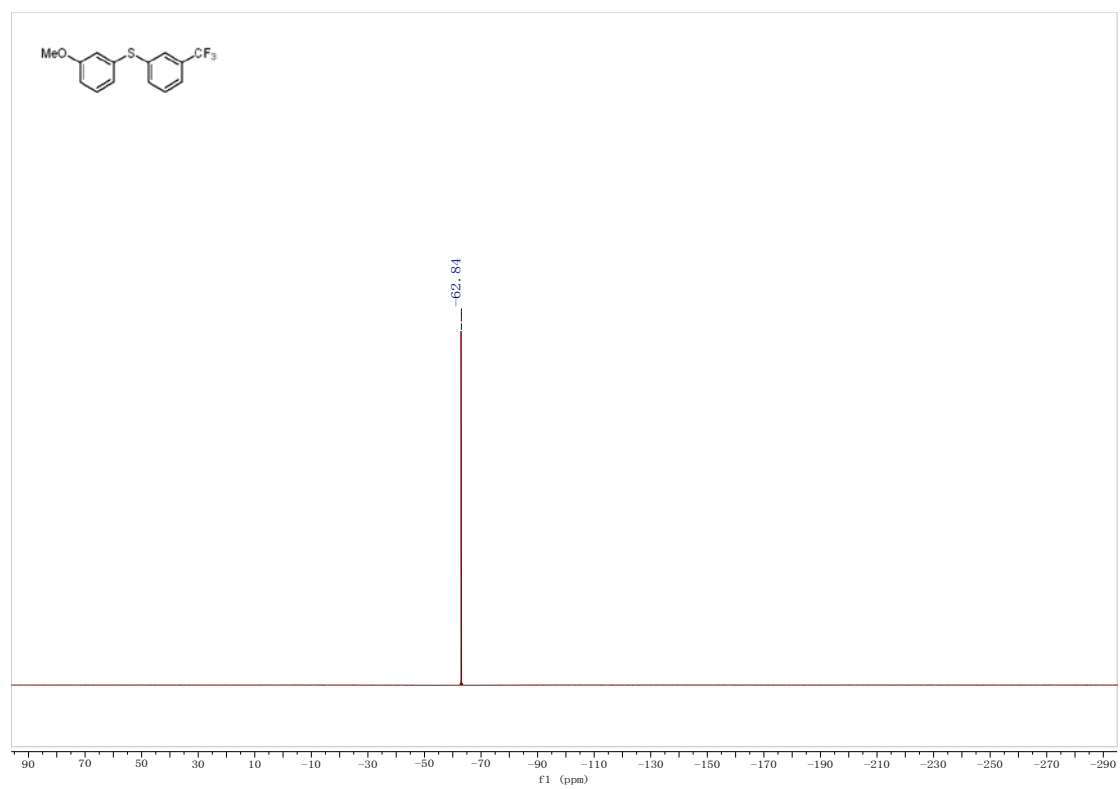

$^1\text{H}$  NMR Spectrum of **3bv** (500 MHz,  $\text{CDCl}_3$ )

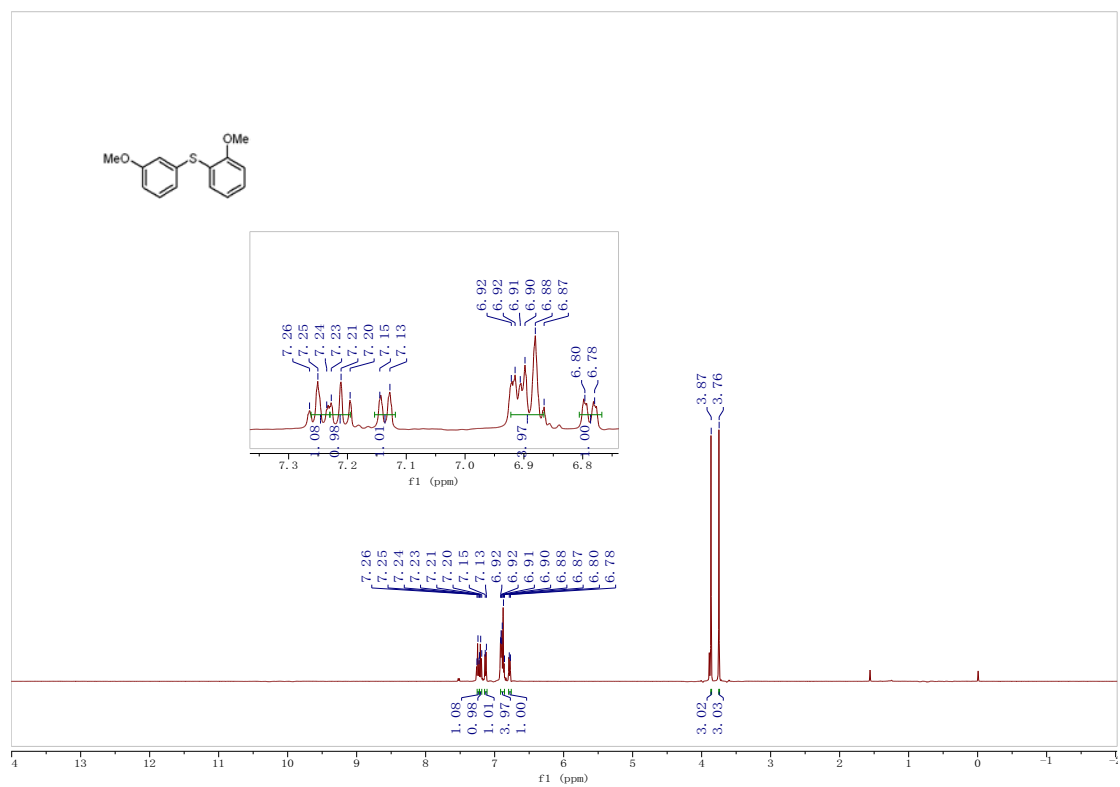

<sup>13</sup>C NMR Spectrum of **3bw** (126 MHz, CDCl<sub>3</sub>)

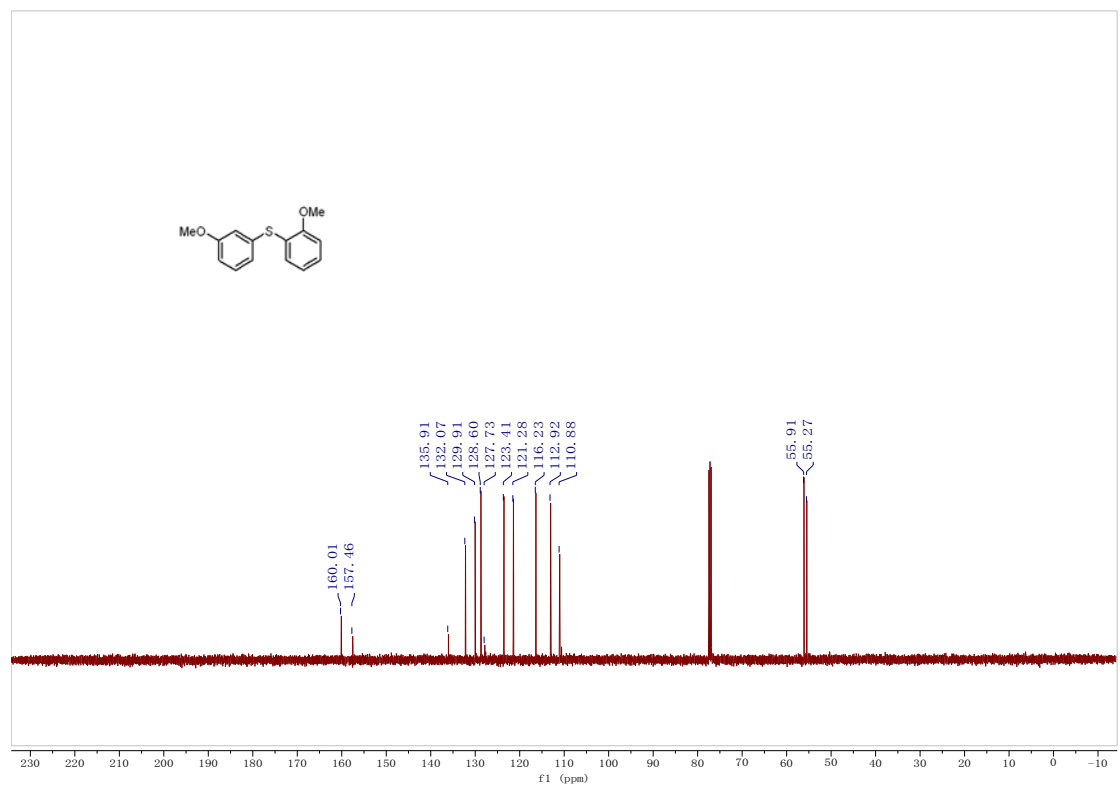

<sup>1</sup>H NMR Spectrum of **3bw** (400 MHz, CDCl<sub>3</sub>)

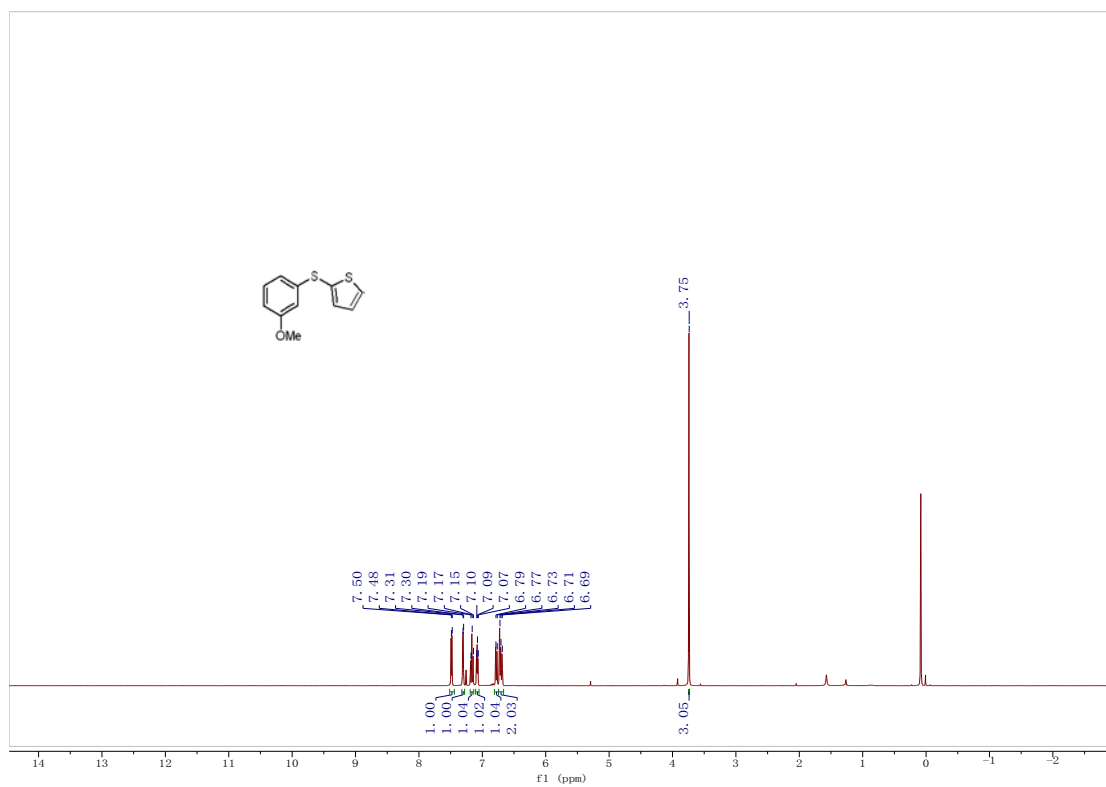

<sup>13</sup>C NMR Spectrum of **3bw** (101 MHz, CDCl<sub>3</sub>)

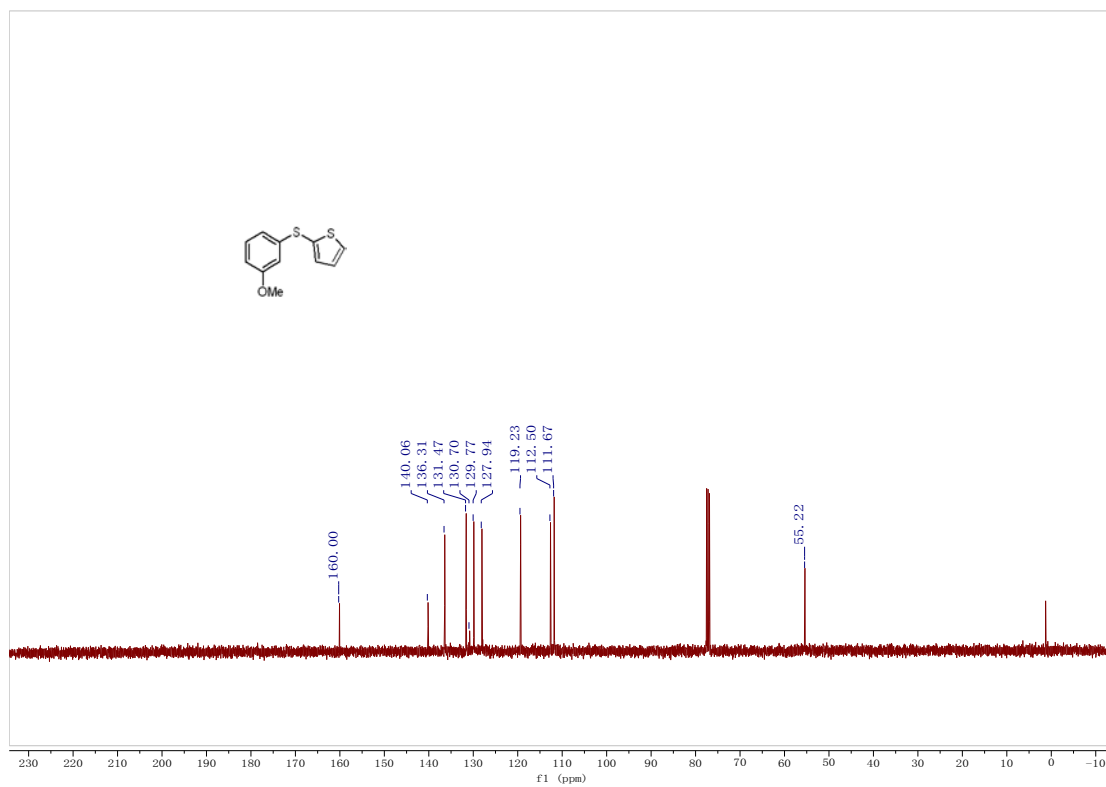

<sup>1</sup>H NMR Spectrum of **3bx** (400 MHz, CDCl<sub>3</sub>)

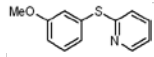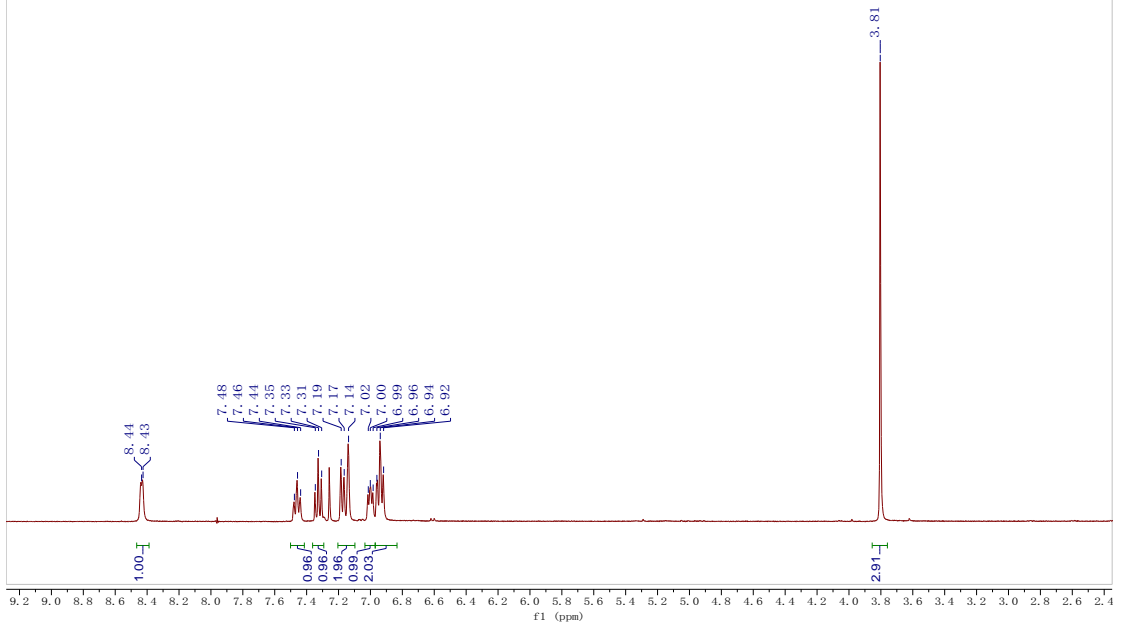

<sup>13</sup>C NMR Spectrum of 3bx (101 MHz, CDCl<sub>3</sub>)

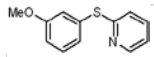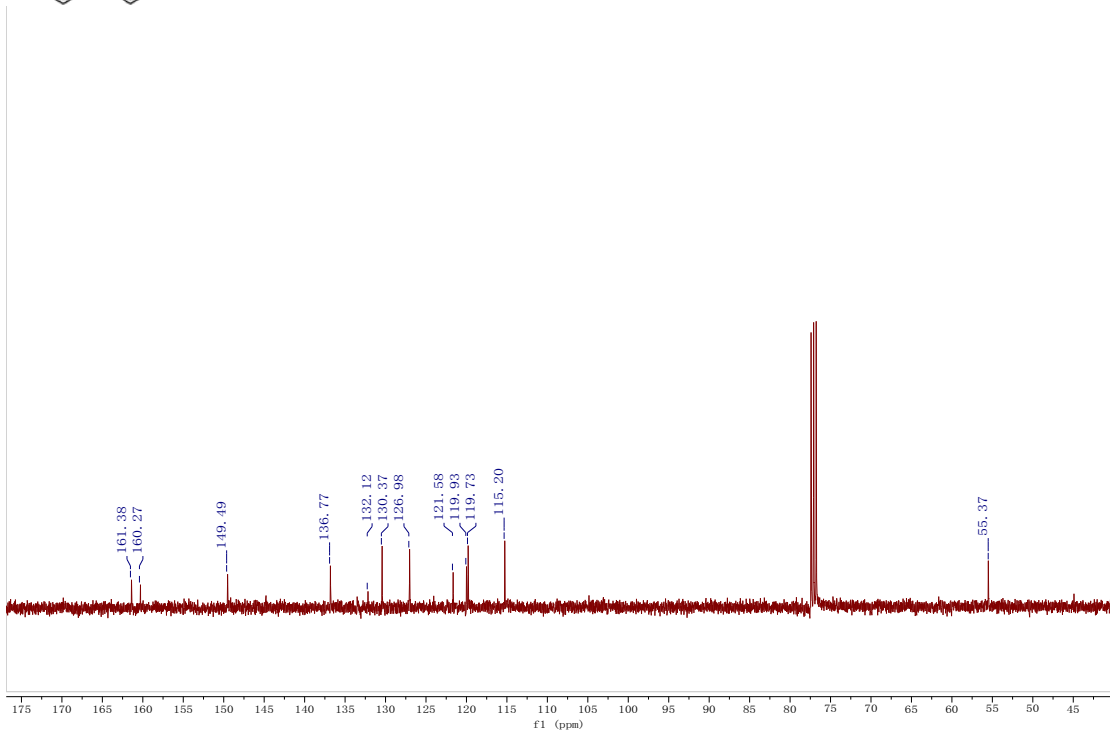

<sup>1</sup>H NMR Spectrum of **3by** (400 MHz, CDCl<sub>3</sub>)

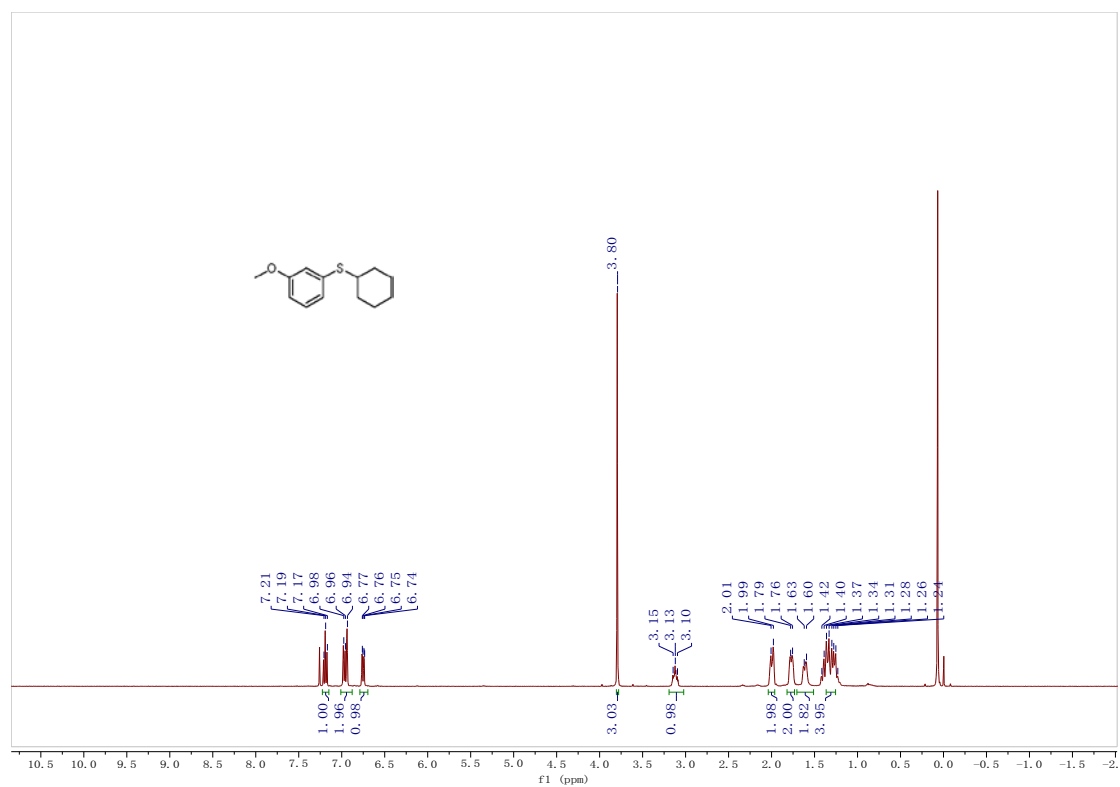

<sup>13</sup>C NMR Spectrum of **3by** (101 MHz, CDCl<sub>3</sub>)

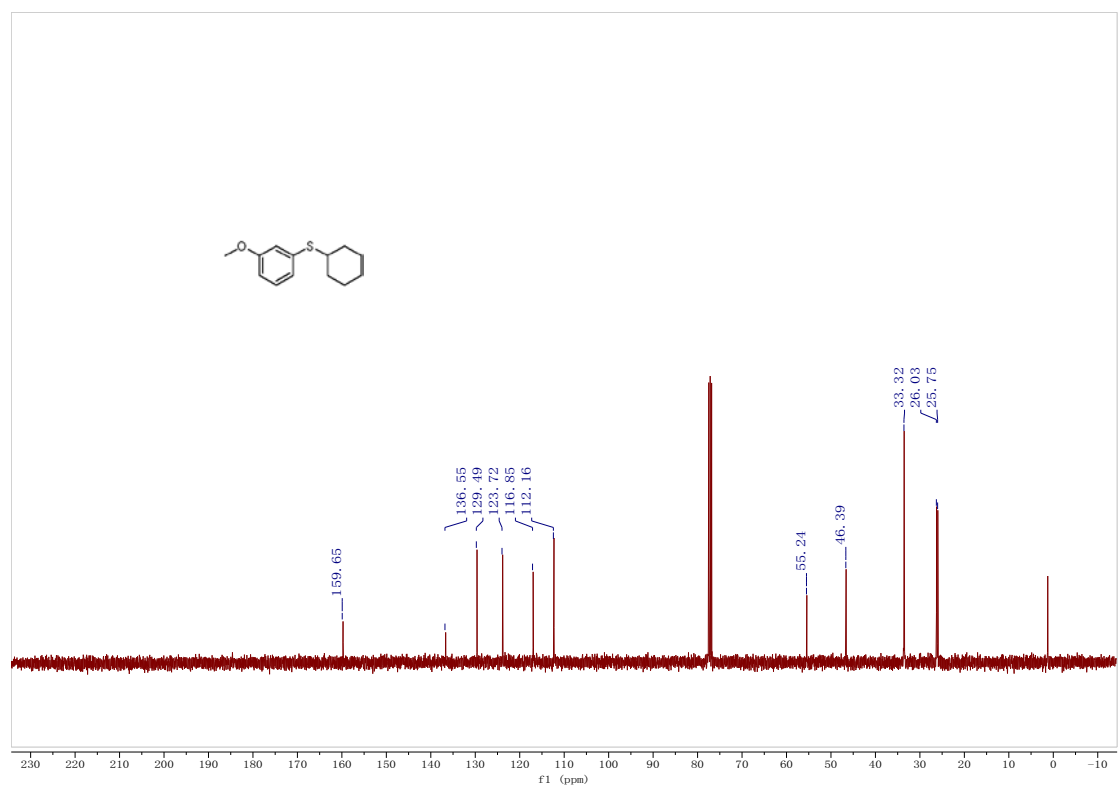

<sup>1</sup>H NMR Spectrum of **3bz** (400 MHz, CDCl<sub>3</sub>)

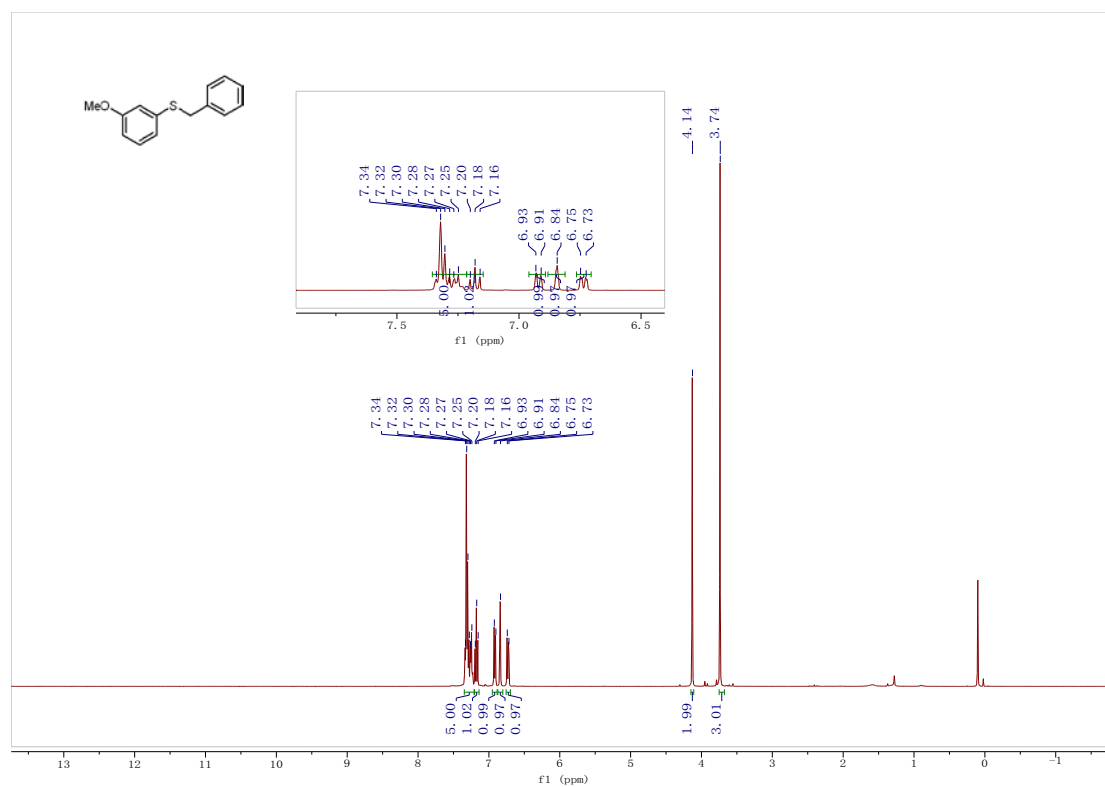

<sup>13</sup>C NMR Spectrum of **3bz** (101 MHz, CDCl<sub>3</sub>)

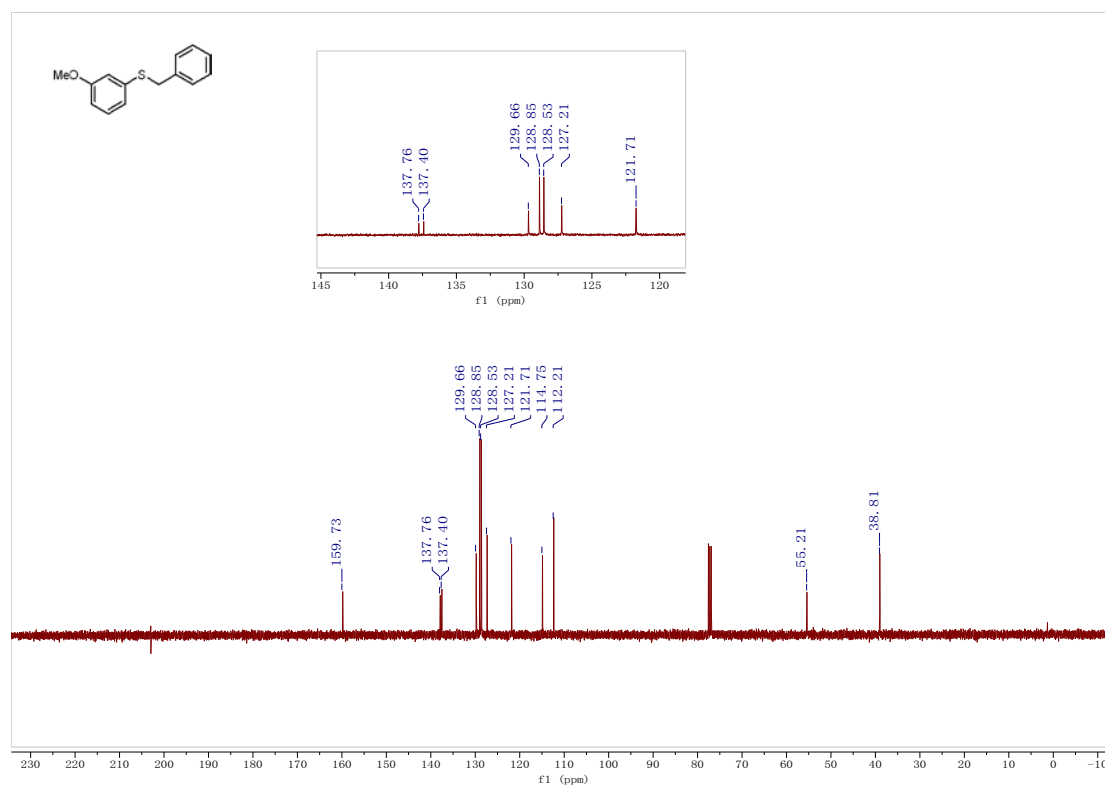



### <sup>1</sup>H NMR Spectrum of **3ca** (500 MHz, CDCl<sub>3</sub>)

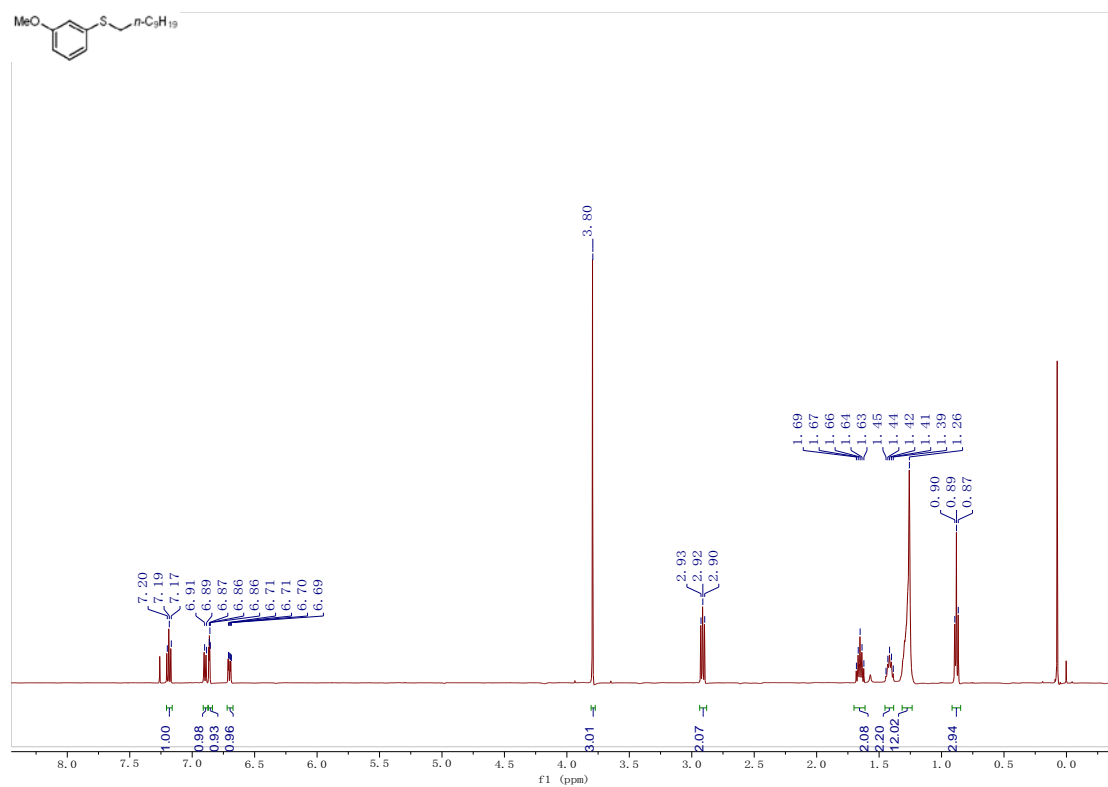

### <sup>13</sup>C NMR Spectrum of **3ca** (101 MHz, CDCl<sub>3</sub>)

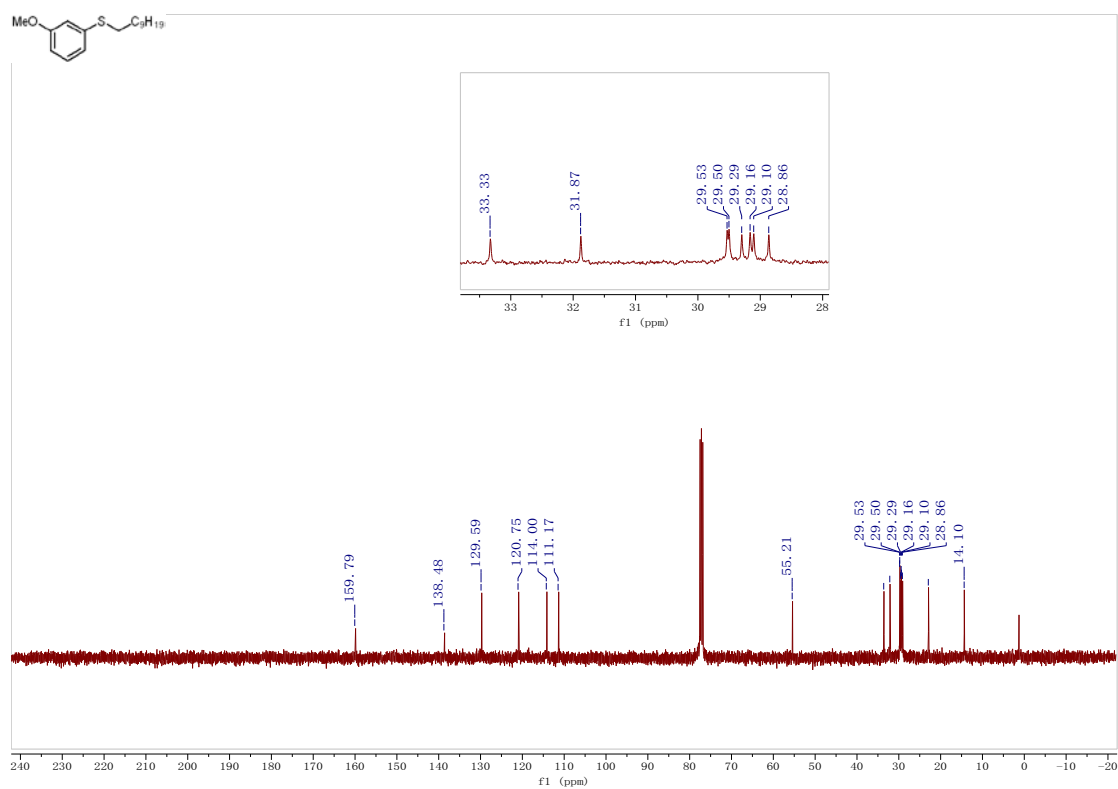

$^1\text{H}$  NMR Spectrum of **3cb** (500 MHz,  $\text{CDCl}_3$ )

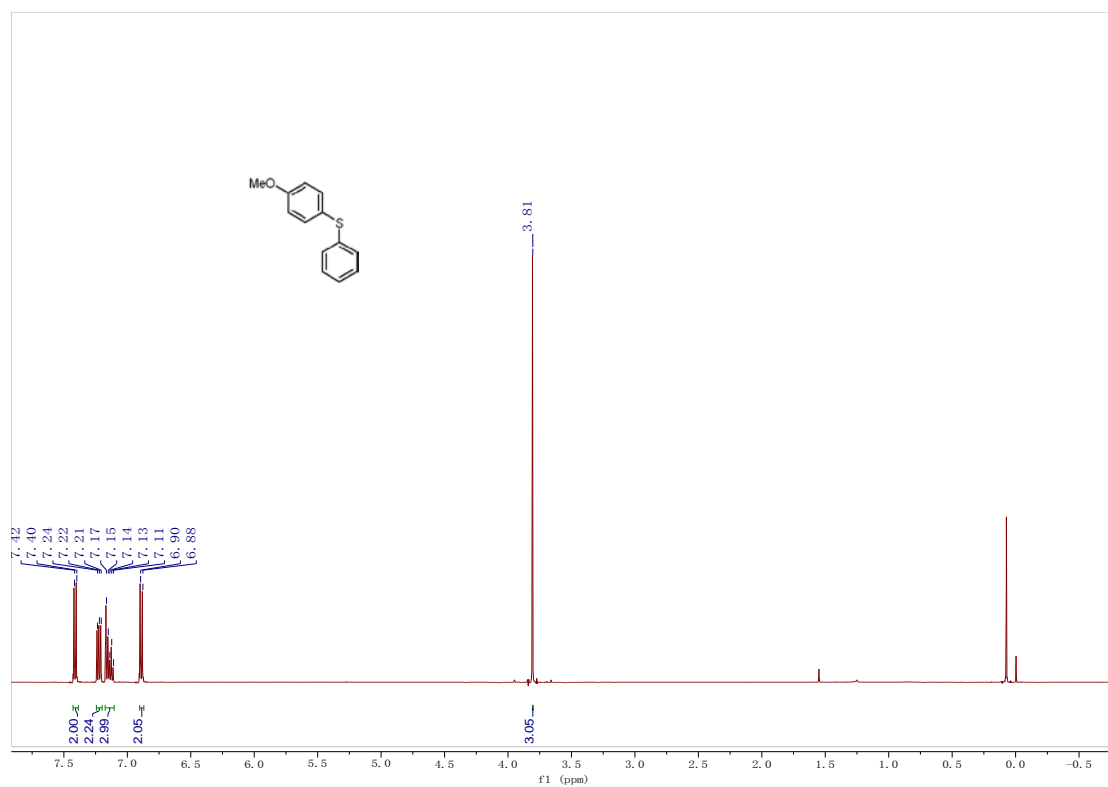

$^{13}\text{C}$  NMR Spectrum of **3cb** (126 MHz,  $\text{CDCl}_3$ )

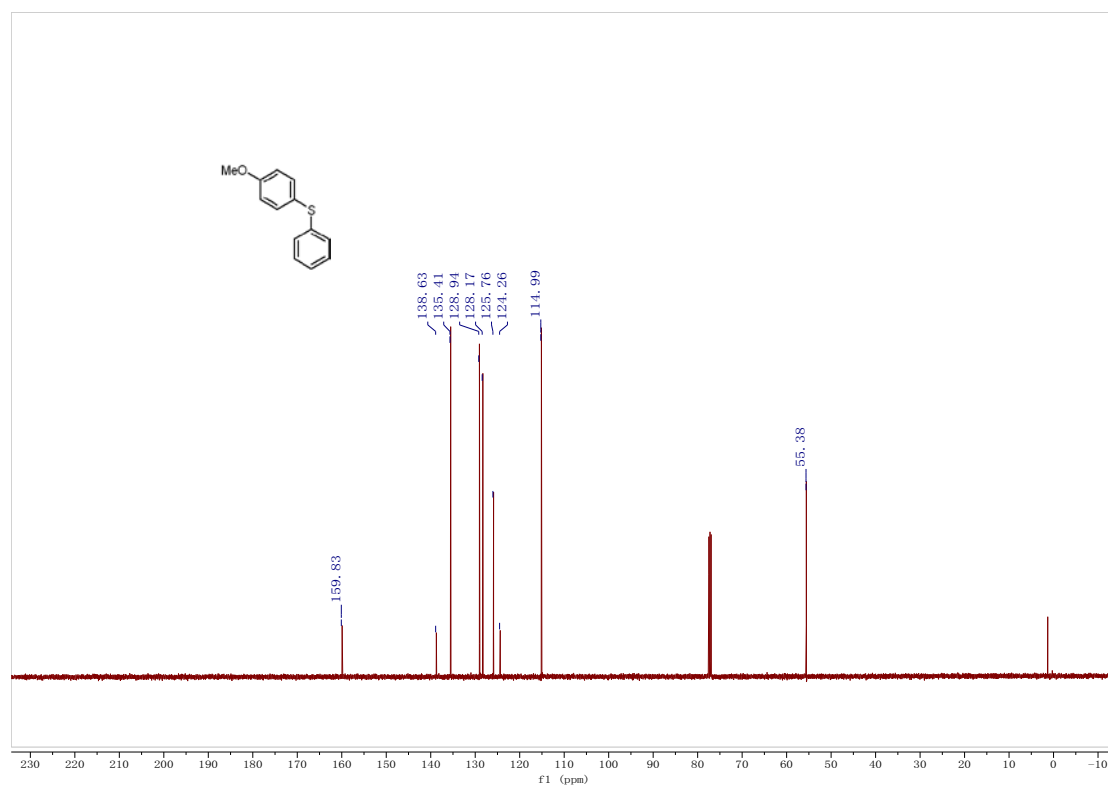

<sup>1</sup>H NMR Spectrum of **3cc** (500 MHz, CDCl<sub>3</sub>)

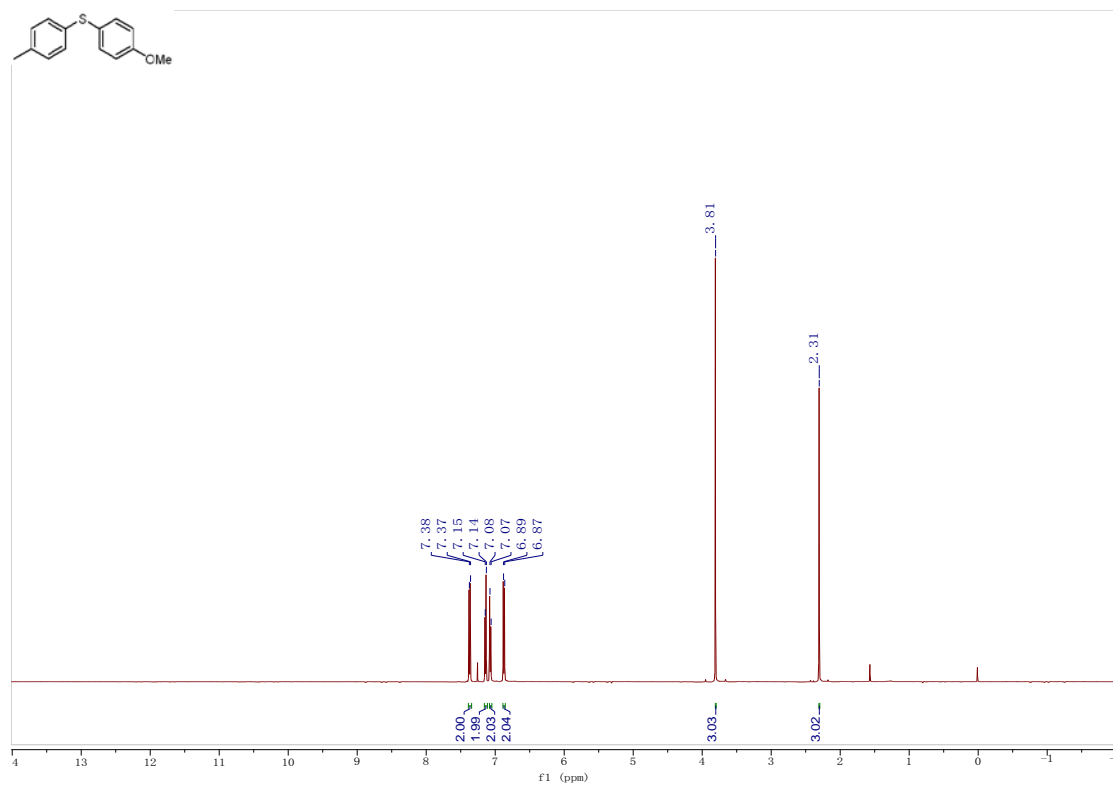

<sup>13</sup>C NMR Spectrum of **3cc** (126 MHz, CDCl<sub>3</sub>)

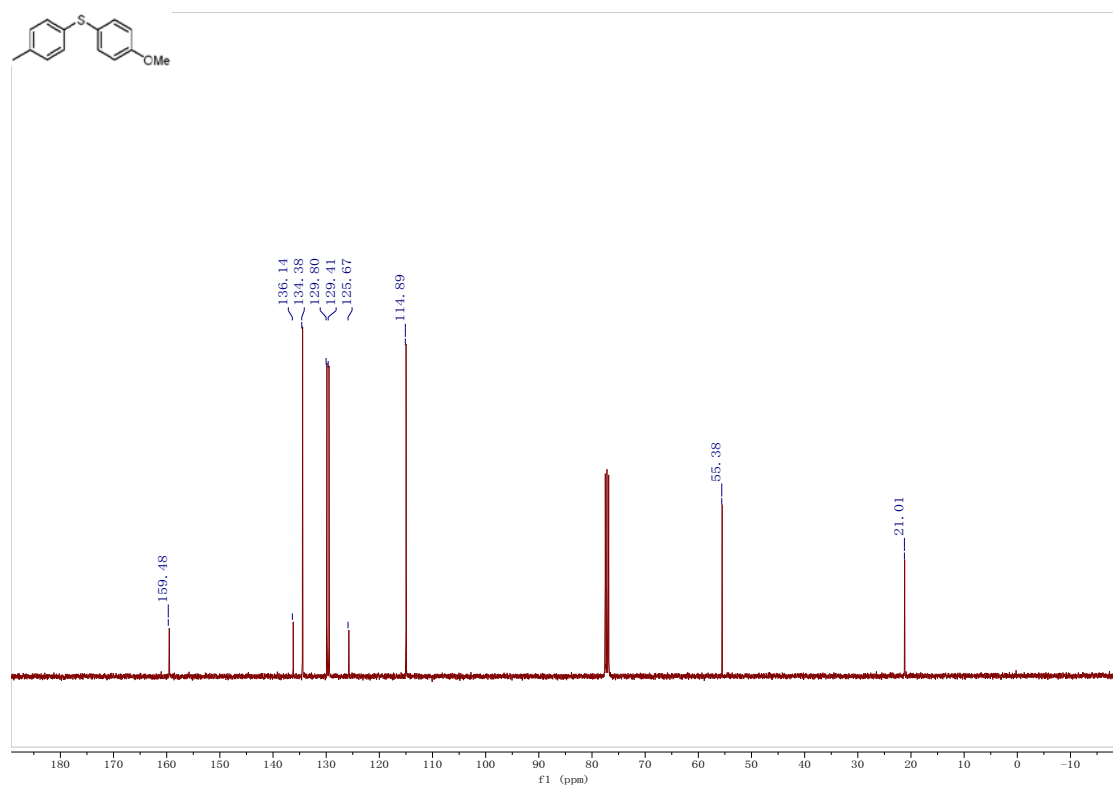

<sup>1</sup>H NMR Spectrum of **3cd** (500 MHz, CDCl<sub>3</sub>)

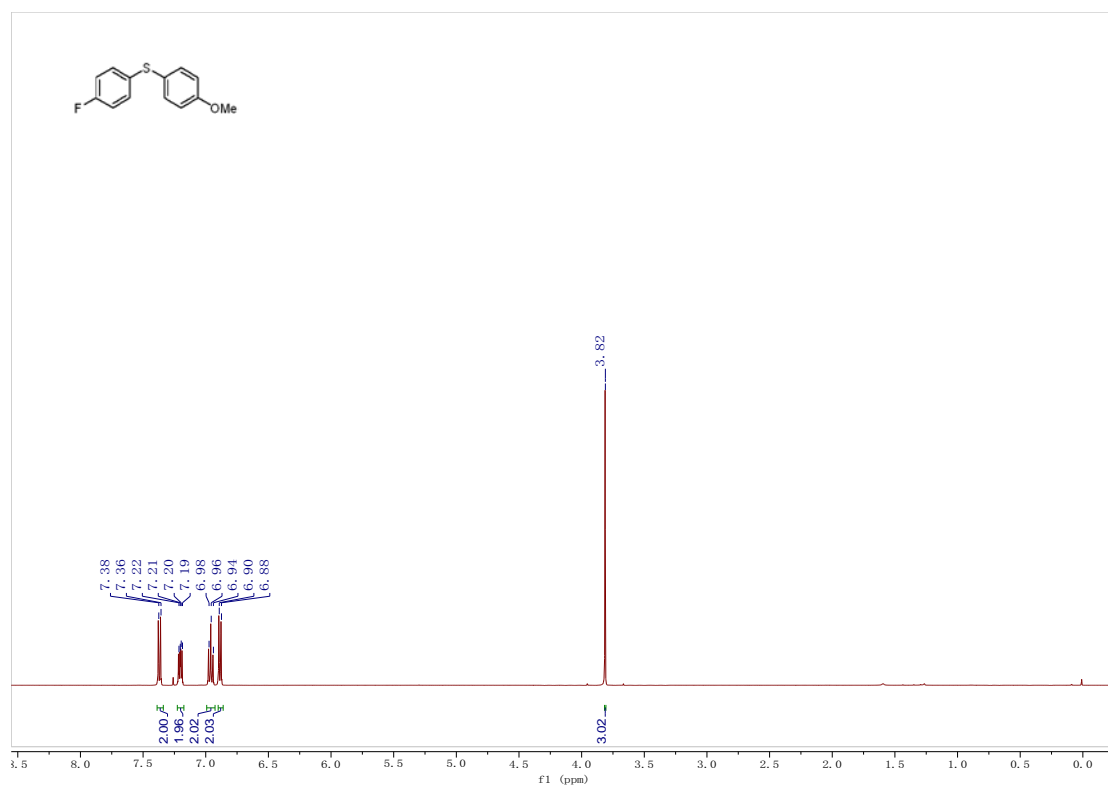

<sup>13</sup>C NMR Spectrum of **3cd** (126 MHz, CDCl<sub>3</sub>)

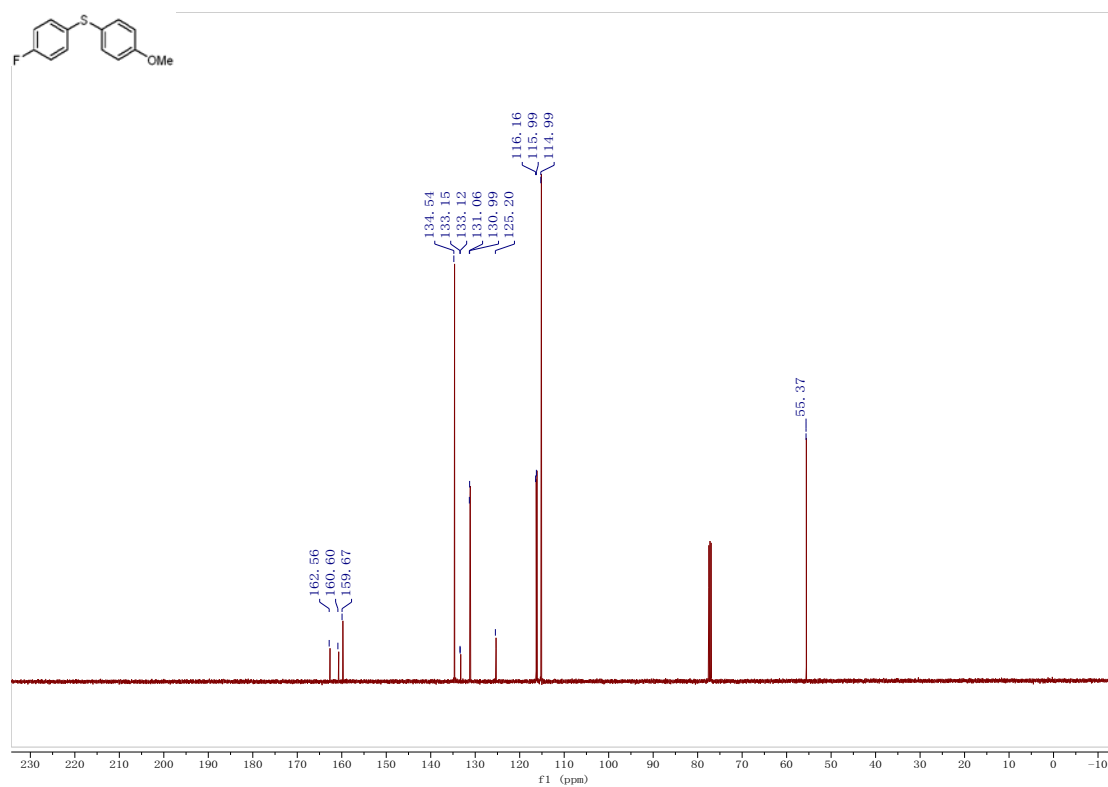

$^{19}\text{F}$  NMR Spectrum of **3cd** (376 MHz,  $\text{CDCl}_3$ )

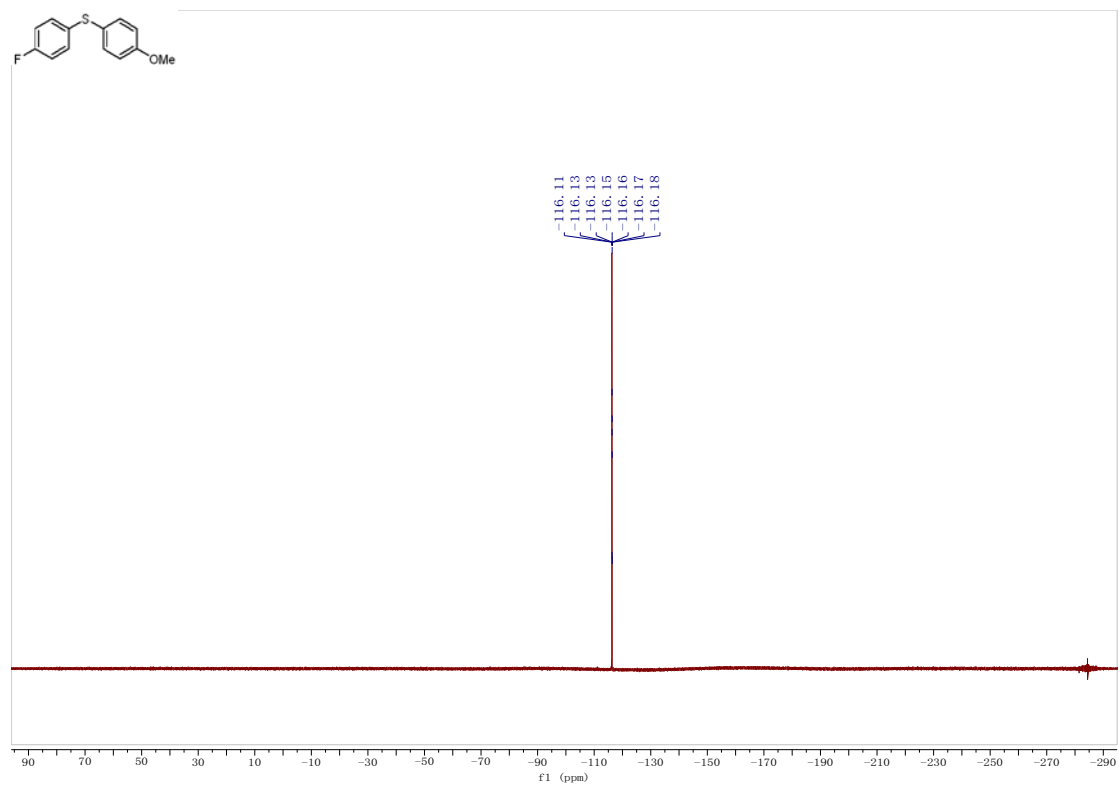

$^1\text{H}$  NMR Spectrum of **3ce** (500 MHz,  $\text{CDCl}_3$ )

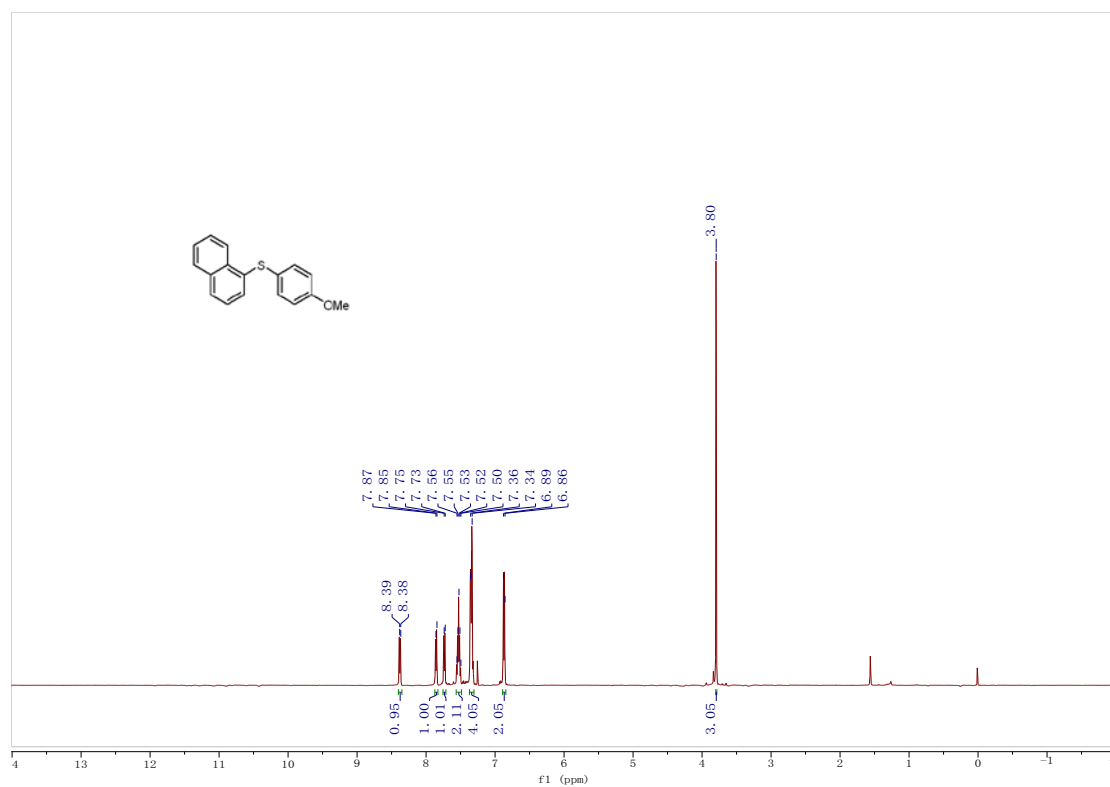

$^{13}\text{C}$  NMR Spectrum of **3ce** (126 MHz,  $\text{CDCl}_3$ )

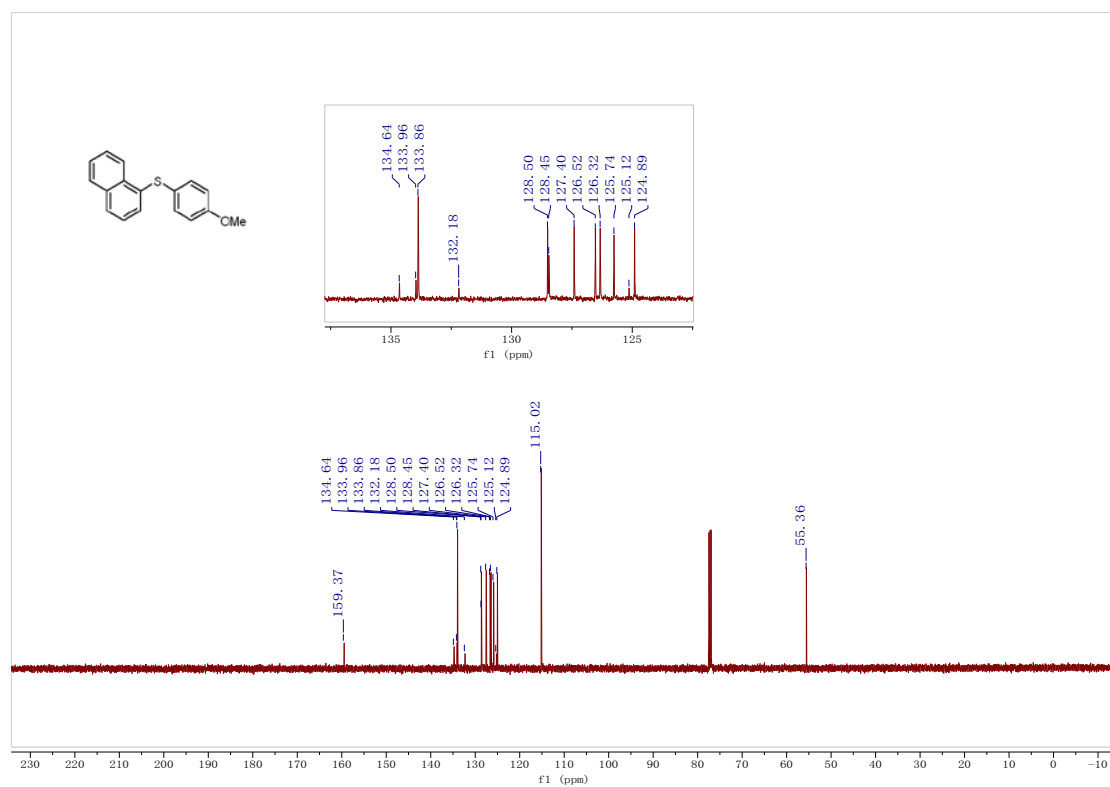

<sup>1</sup>H NMR Spectrum of **3cf** (500 MHz, CDCl<sub>3</sub>)

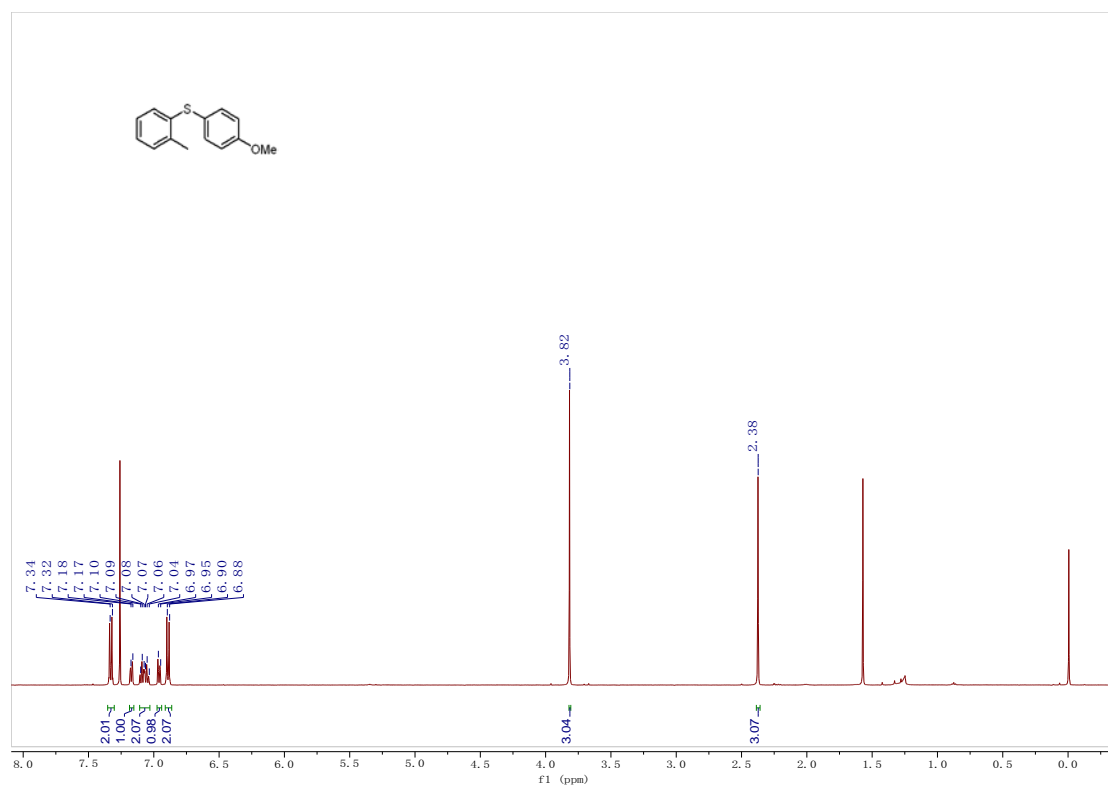

<sup>13</sup>C NMR Spectrum of **3cf** (126 MHz, CDCl<sub>3</sub>)

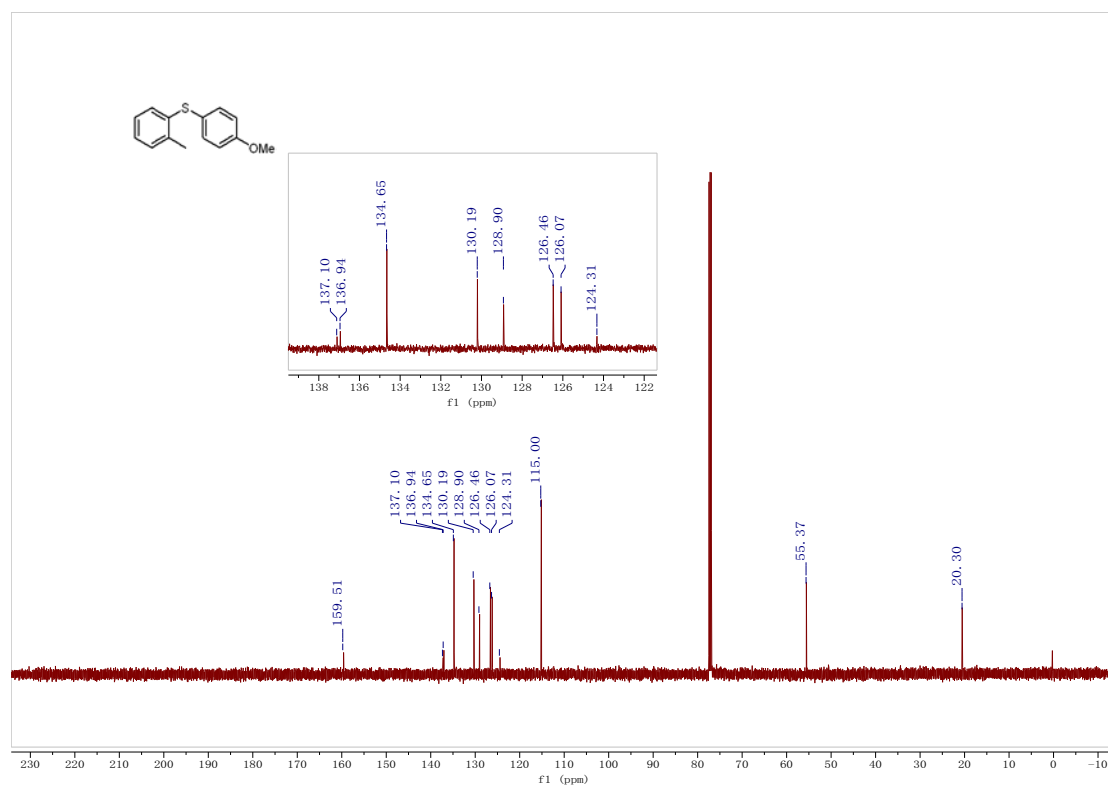

### <sup>1</sup>H NMR Spectrum of **3cg** (500 MHz, CDCl<sub>3</sub>)

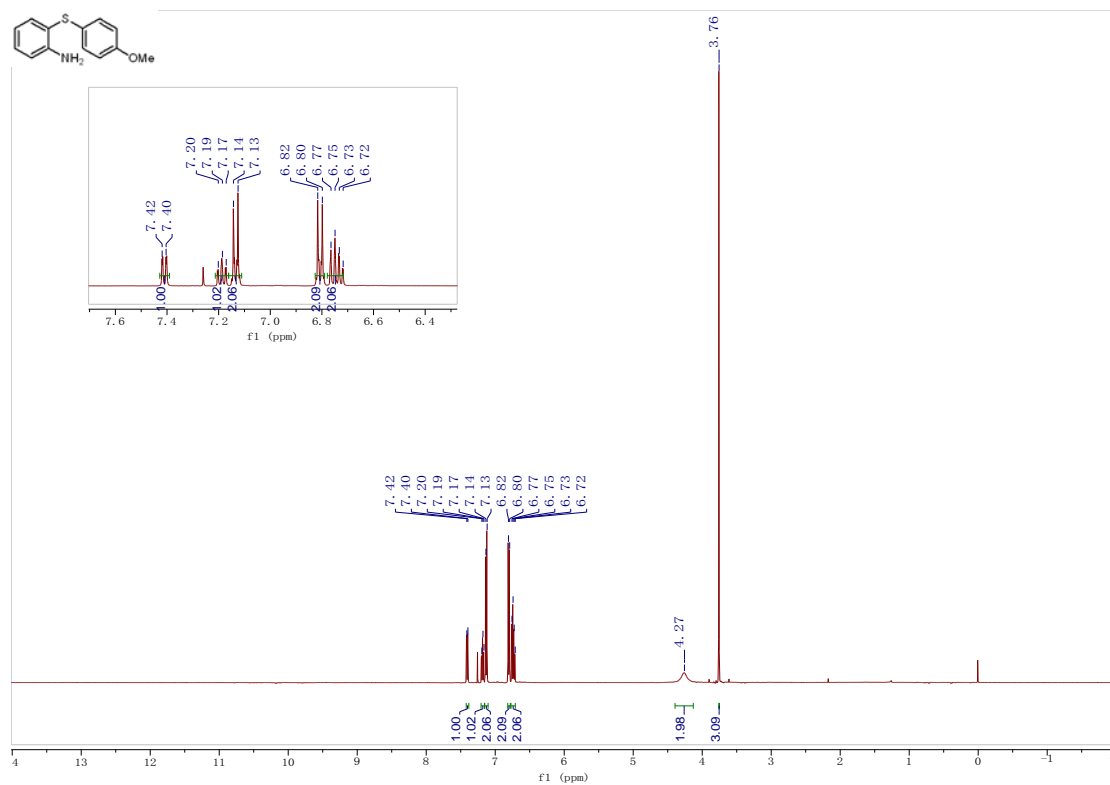

### <sup>13</sup>C NMR Spectrum of **3cg** (126 MHz, CDCl<sub>3</sub>)

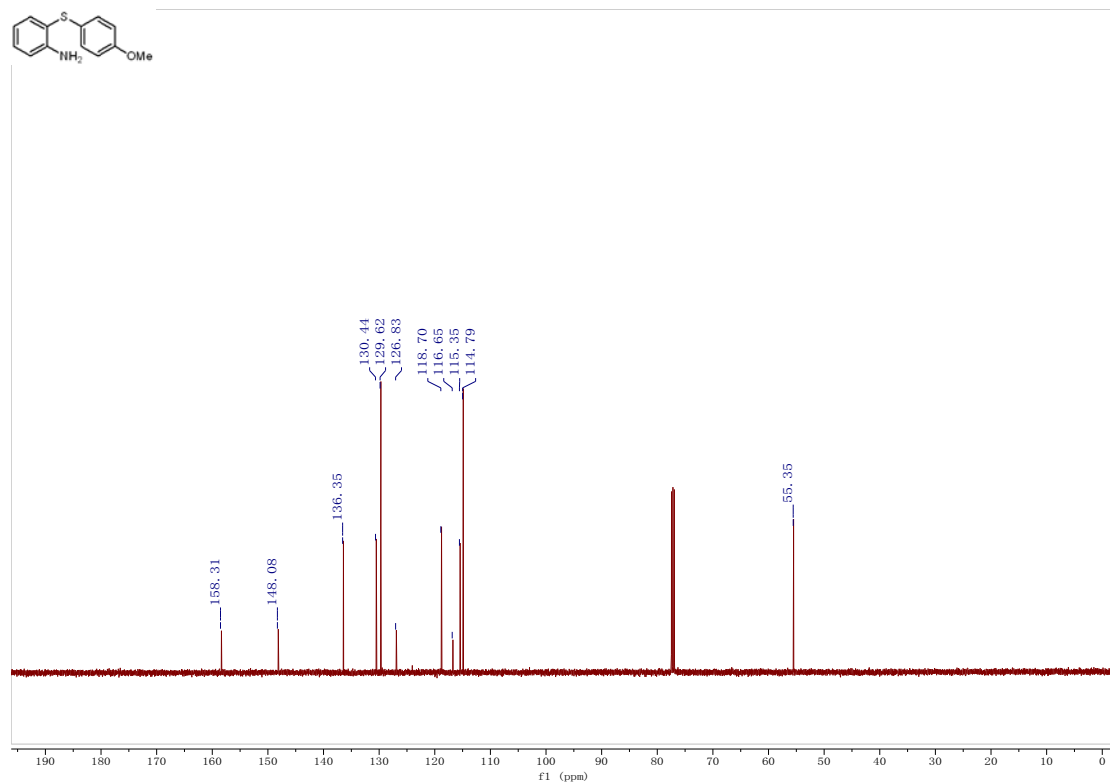



<sup>1</sup>H NMR Spectrum of **3ch** (500 MHz, CDCl<sub>3</sub>)

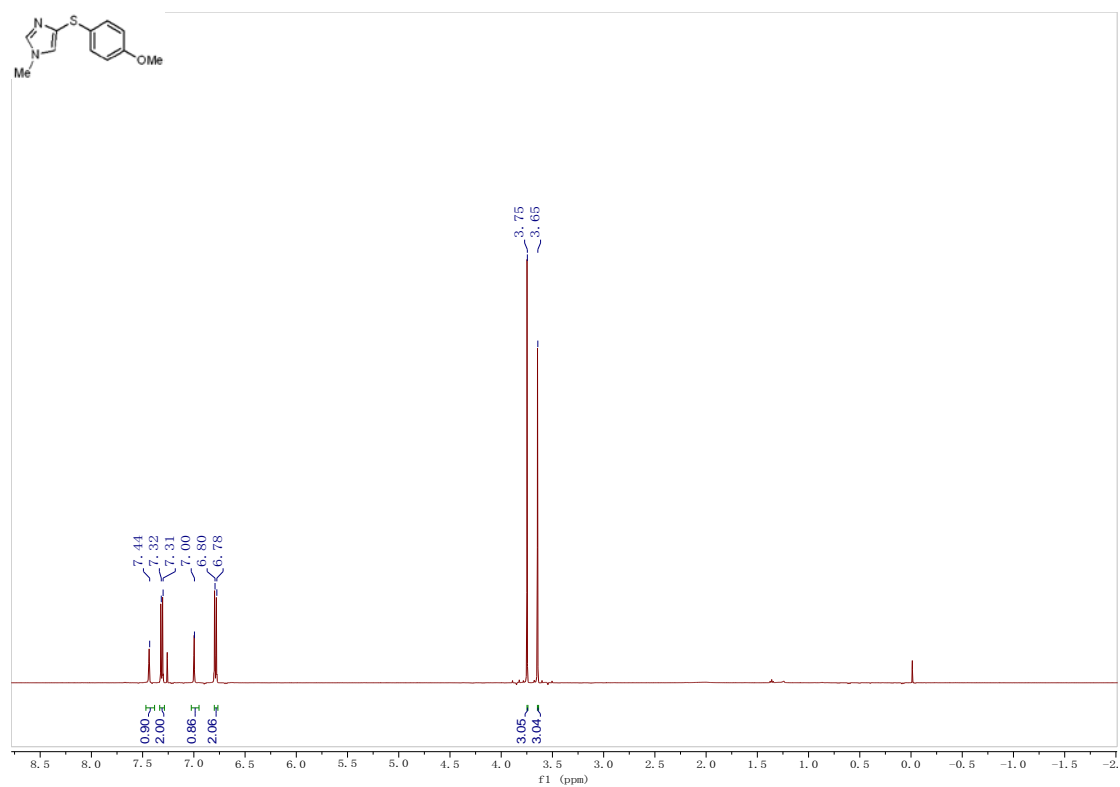

<sup>13</sup>C NMR Spectrum of **3ch** (126 MHz, CDCl<sub>3</sub>)

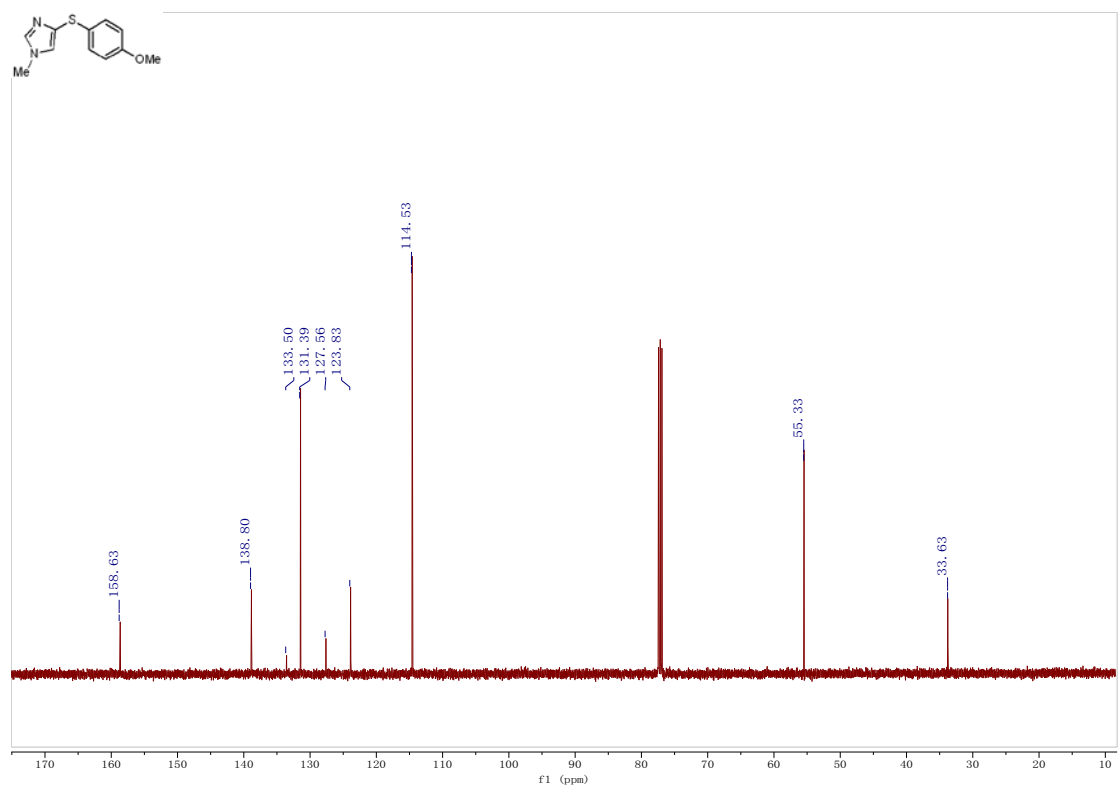

<sup>1</sup>H NMR Spectrum of **3ci** (500 MHz, DMSO-*d*<sub>6</sub>)

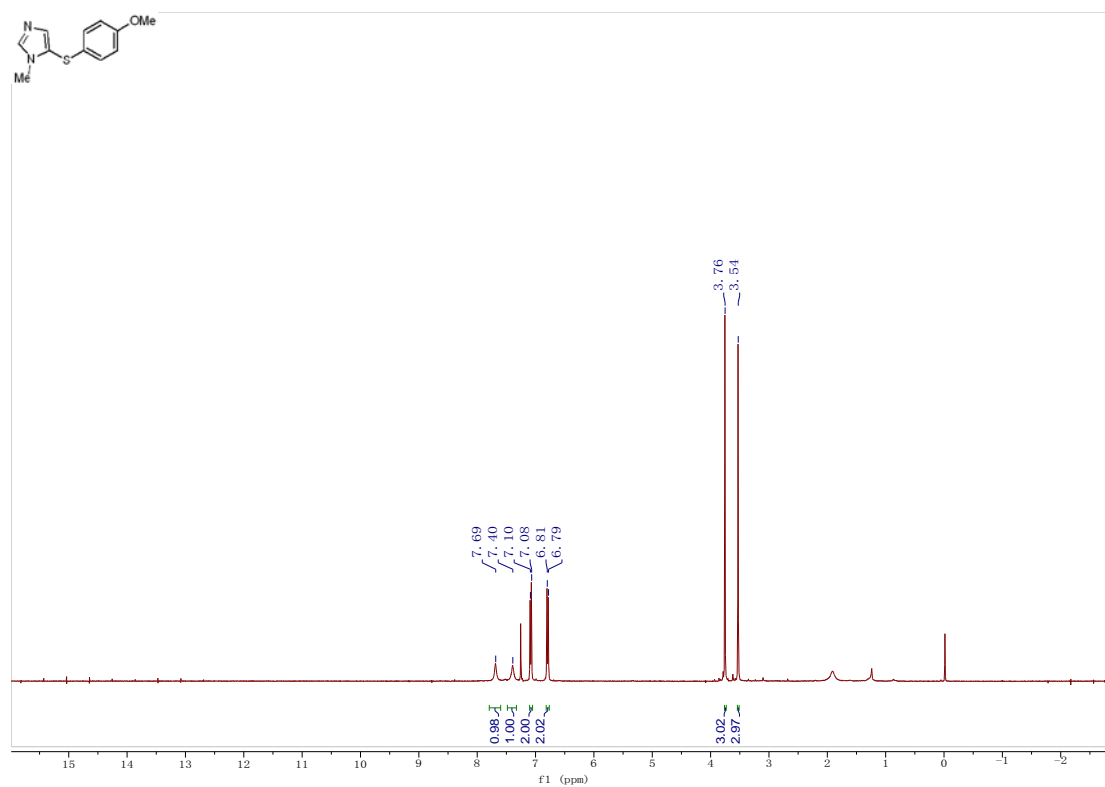

<sup>13</sup>C NMR Spectrum of **3ci** (101 MHz, DMSO-*d*<sub>6</sub>)

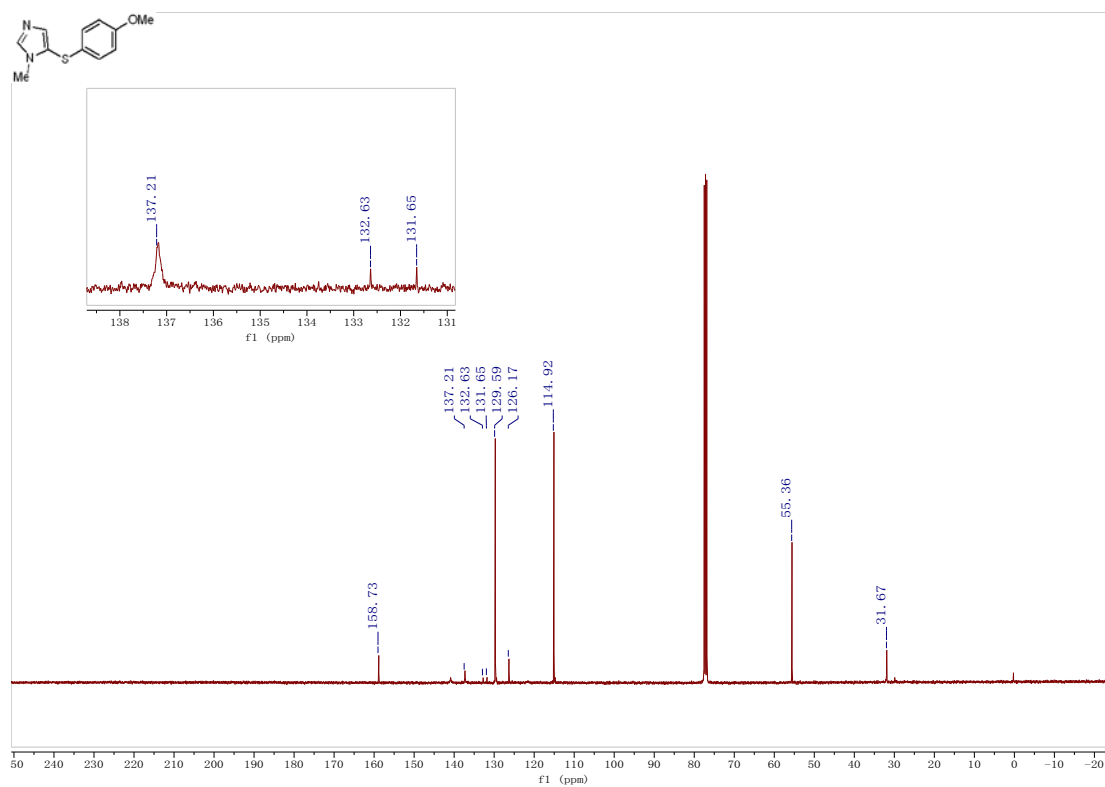

<sup>1</sup>H NMR Spectrum of **3cj** (500 MHz, CDCl<sub>3</sub>)

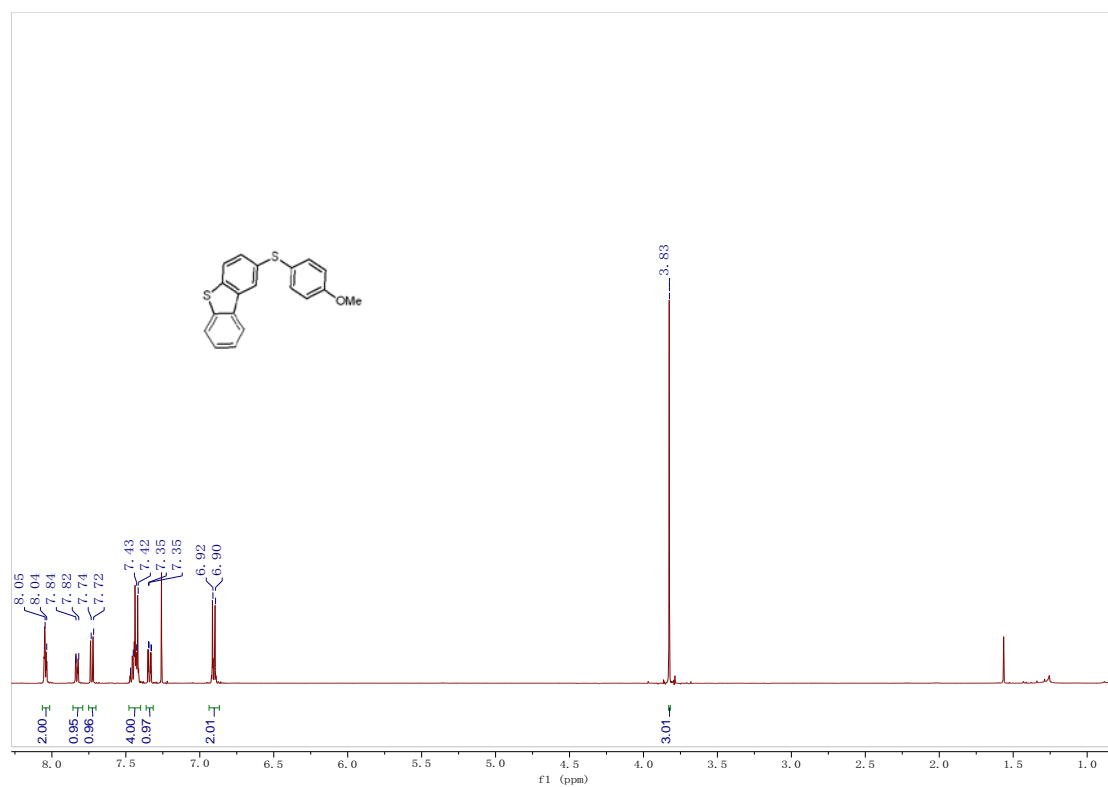

<sup>13</sup>C NMR Spectrum of **3cj** (126 MHz, CDCl<sub>3</sub>)

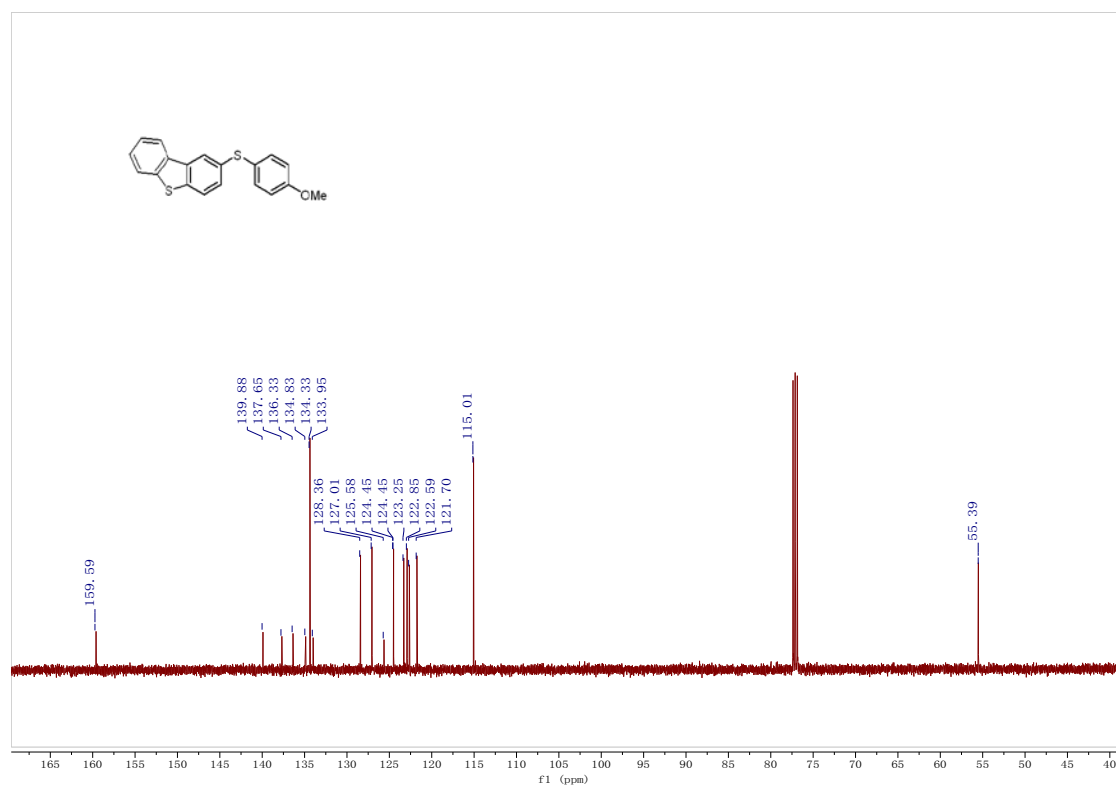

<sup>1</sup>H NMR Spectrum of **3ck** (500 MHz, CDCl<sub>3</sub>)

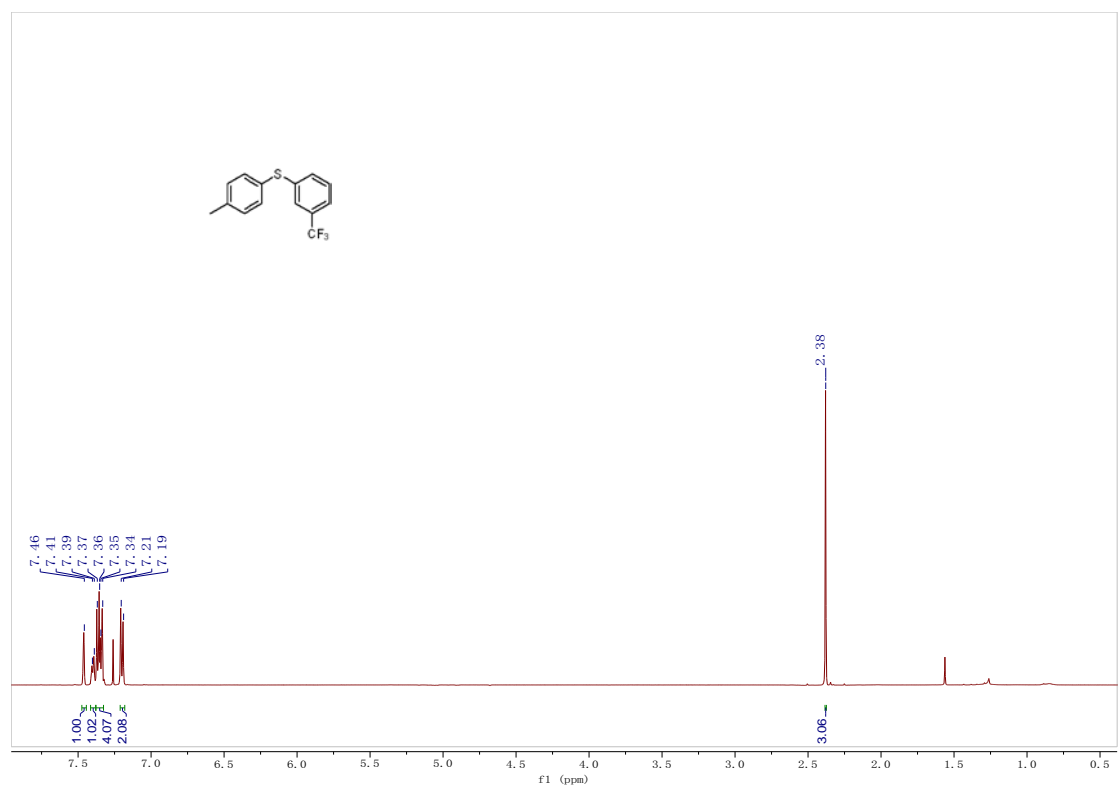

<sup>13</sup>C NMR Spectrum of **3ck** (126 MHz, CDCl<sub>3</sub>)

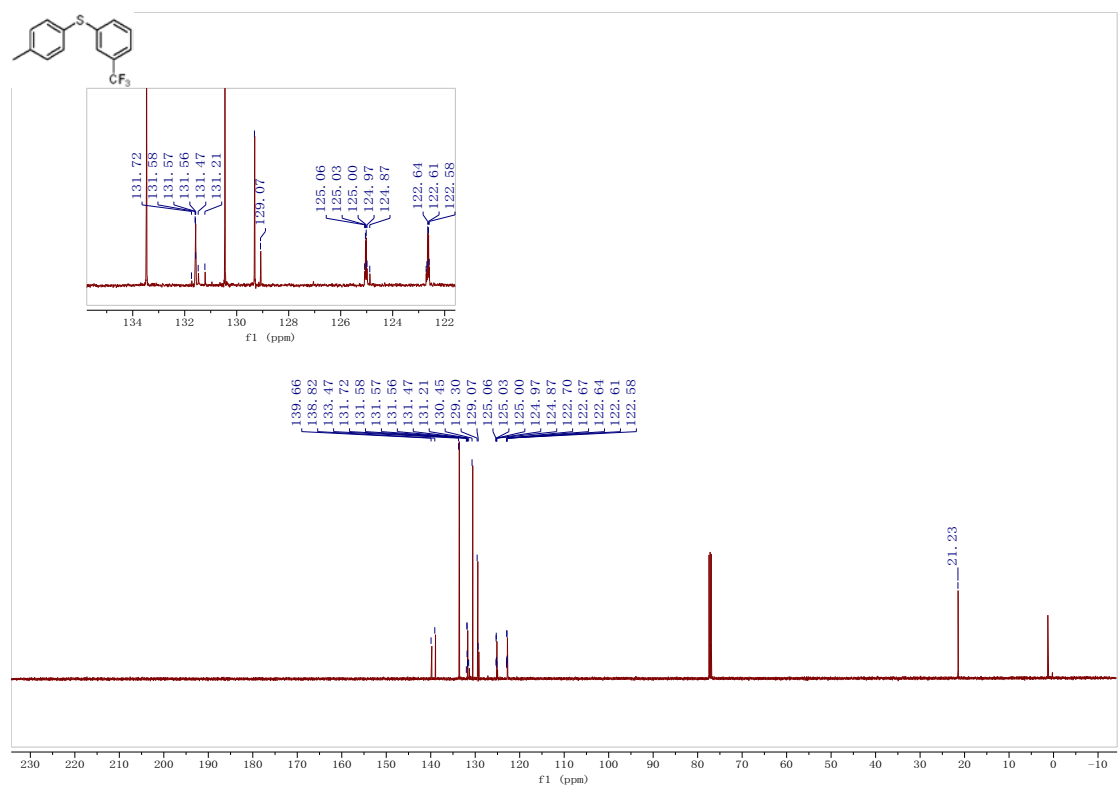

<sup>19</sup>F NMR Spectrum of **3ck** (376 MHz, CDCl<sub>3</sub>)

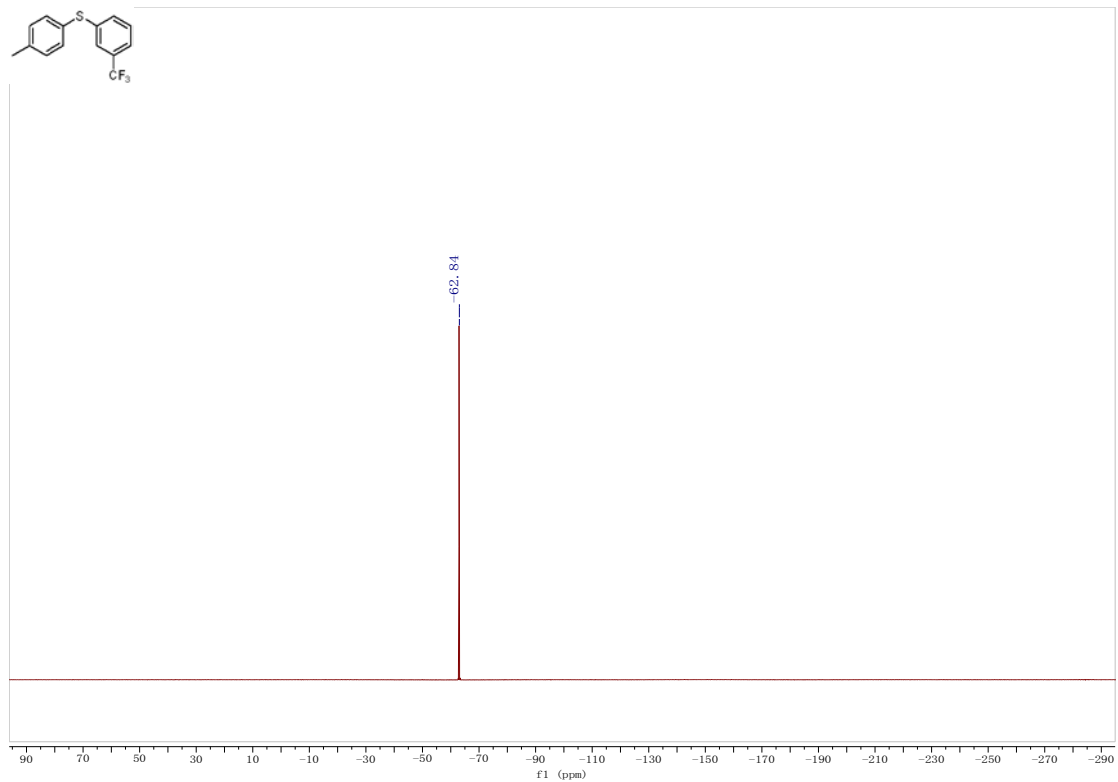

<sup>1</sup>H NMR Spectrum of **3cl** (500 MHz, CDCl<sub>3</sub>)

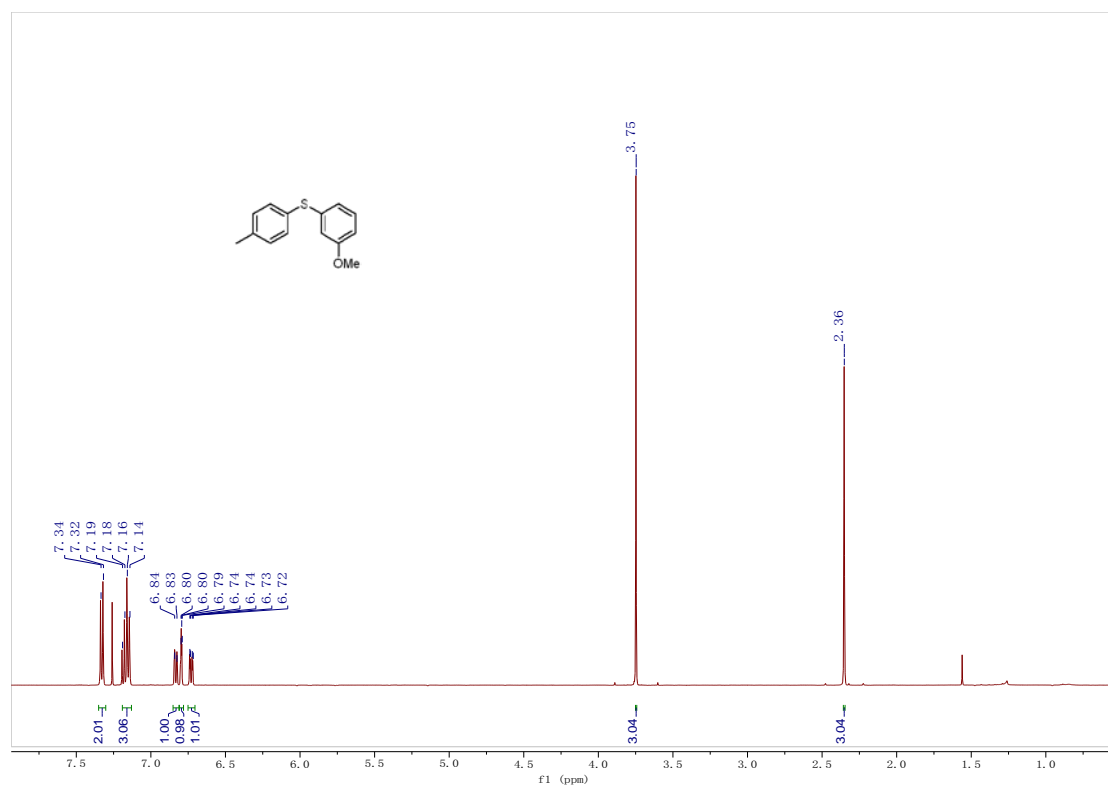

<sup>13</sup>C NMR Spectrum of **3cl** (126 MHz, CDCl<sub>3</sub>)

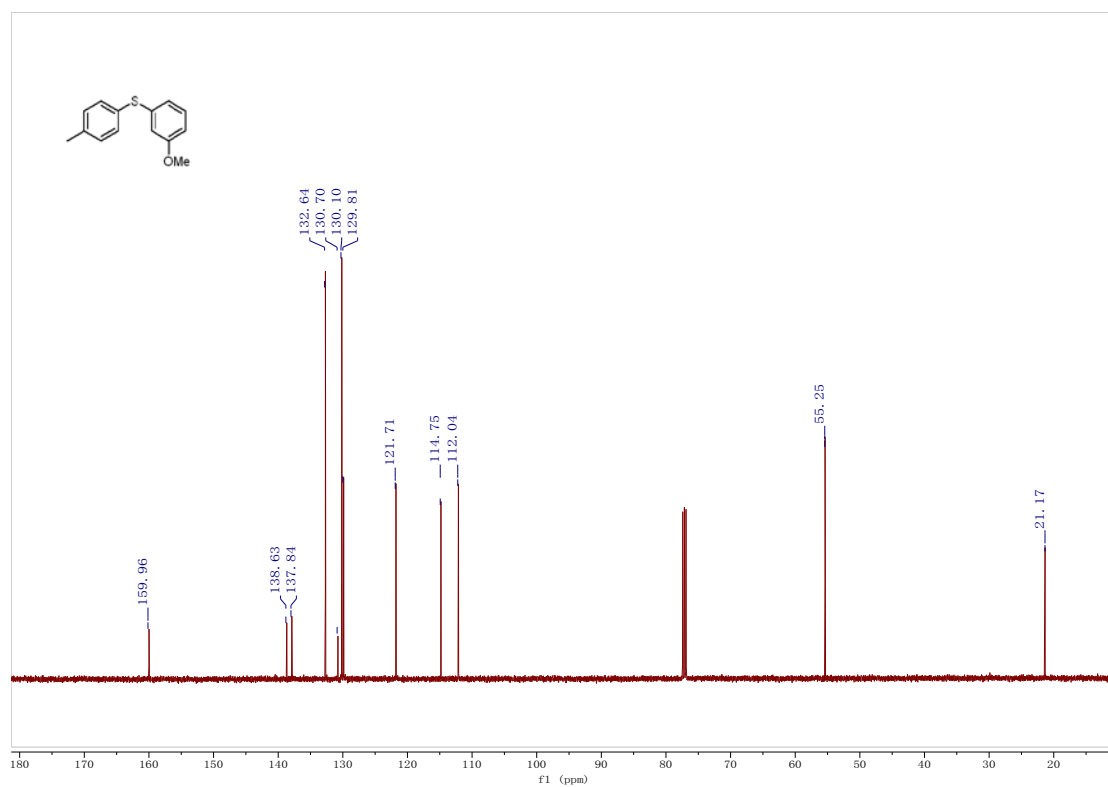

<sup>1</sup>H NMR Spectrum of **3cm** (500 MHz, CDCl<sub>3</sub>)

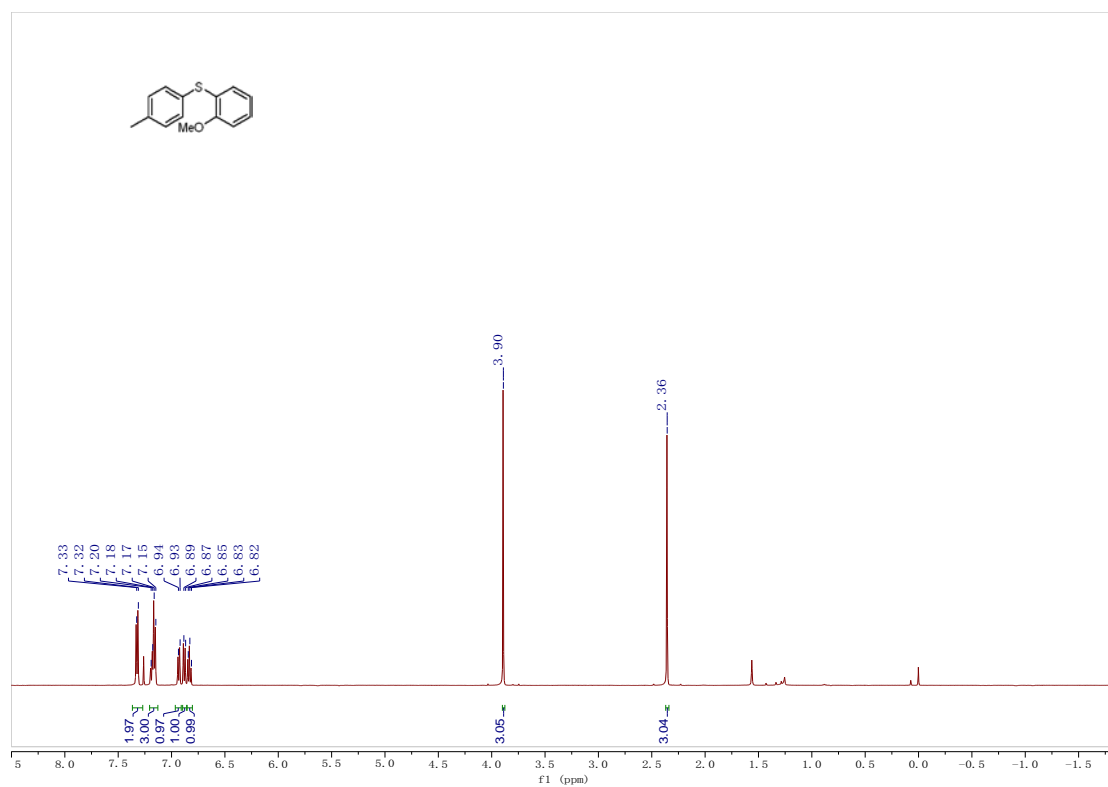

<sup>13</sup>C NMR Spectrum of **3cm** (126 MHz, CDCl<sub>3</sub>)

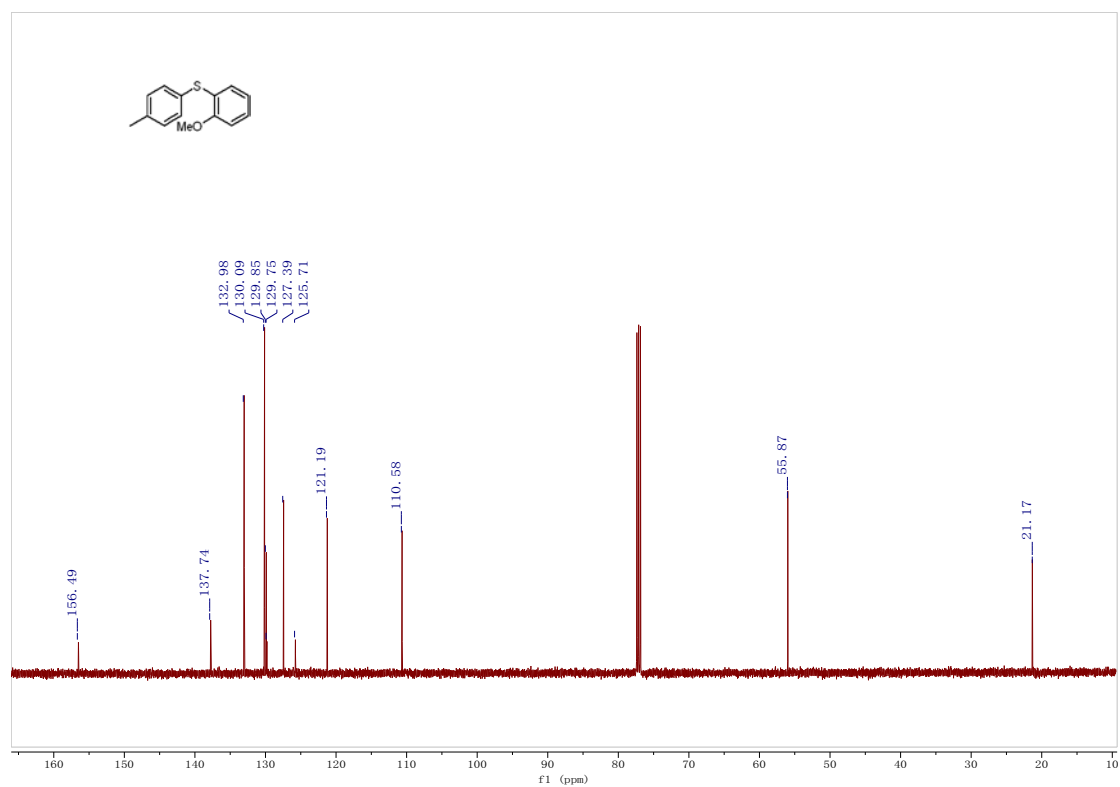

$^1\text{H}$  NMR Spectrum of **3cn** (500 MHz,  $\text{CDCl}_3$ )

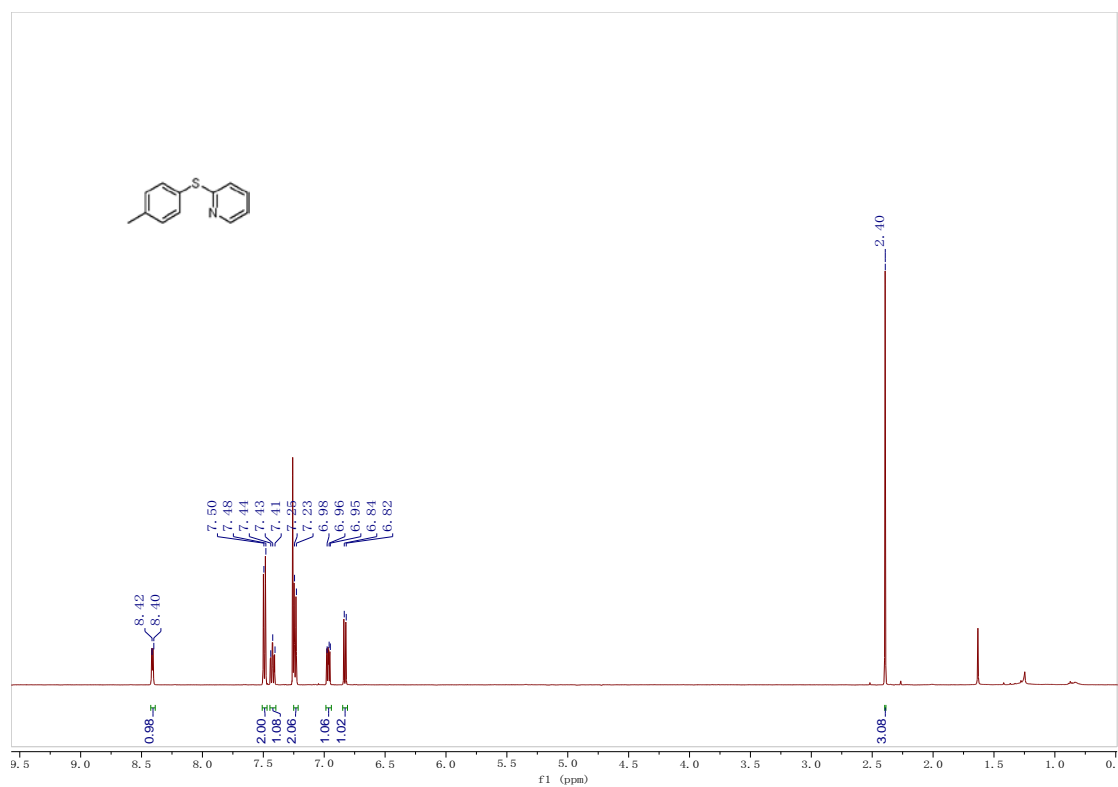

$^{13}\text{C}$  NMR Spectrum of **3cn** (126 MHz,  $\text{CDCl}_3$ )

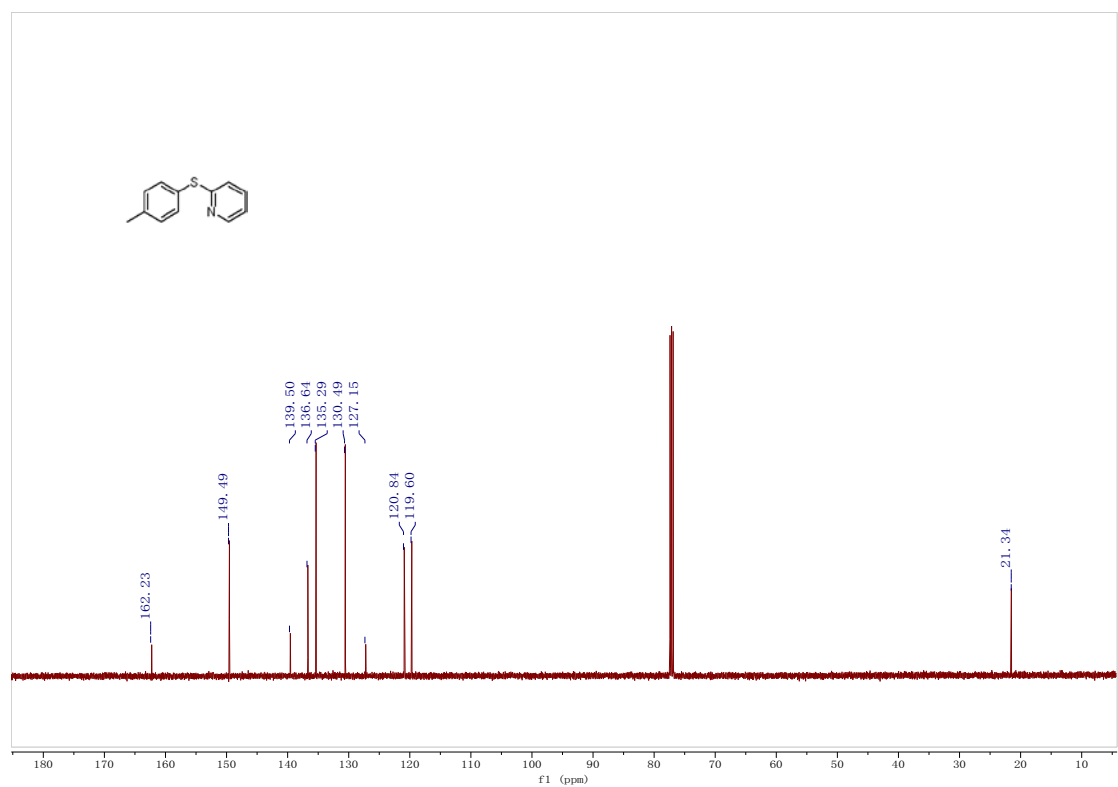



<sup>1</sup>H NMR Spectrum of **3co** (500 MHz, CDCl<sub>3</sub>)

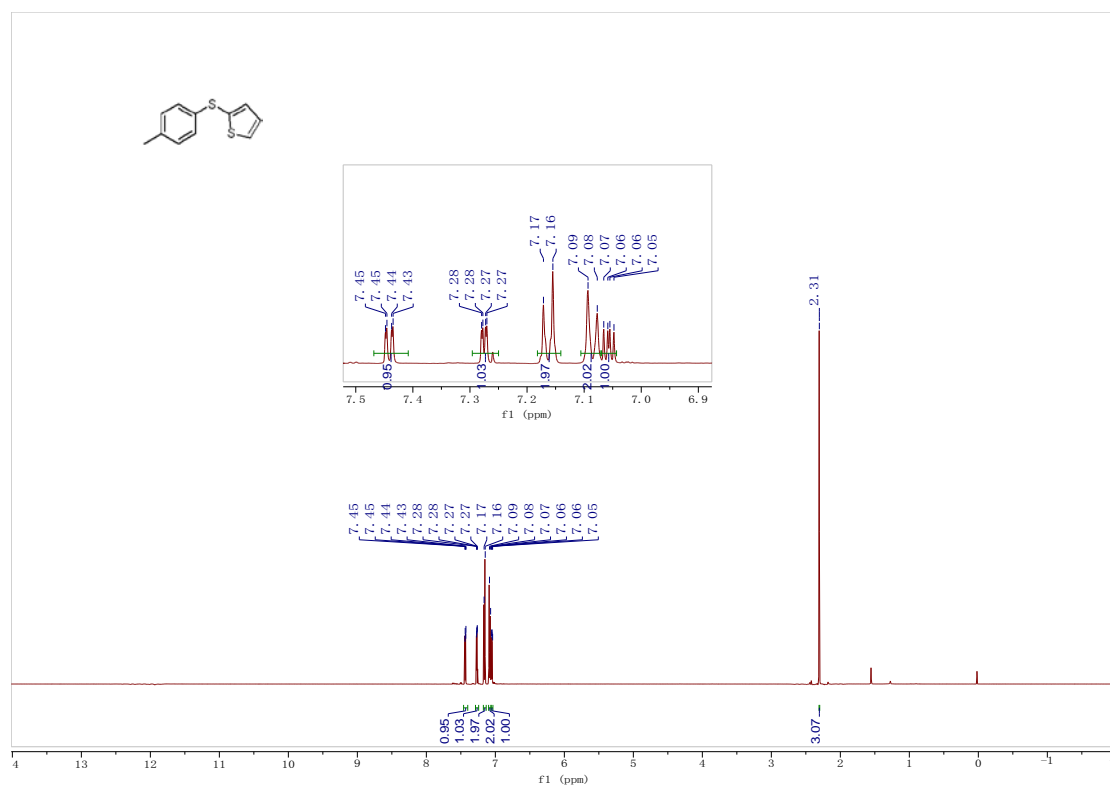

<sup>13</sup>C NMR Spectrum of **3co** (126 MHz, CDCl<sub>3</sub>)

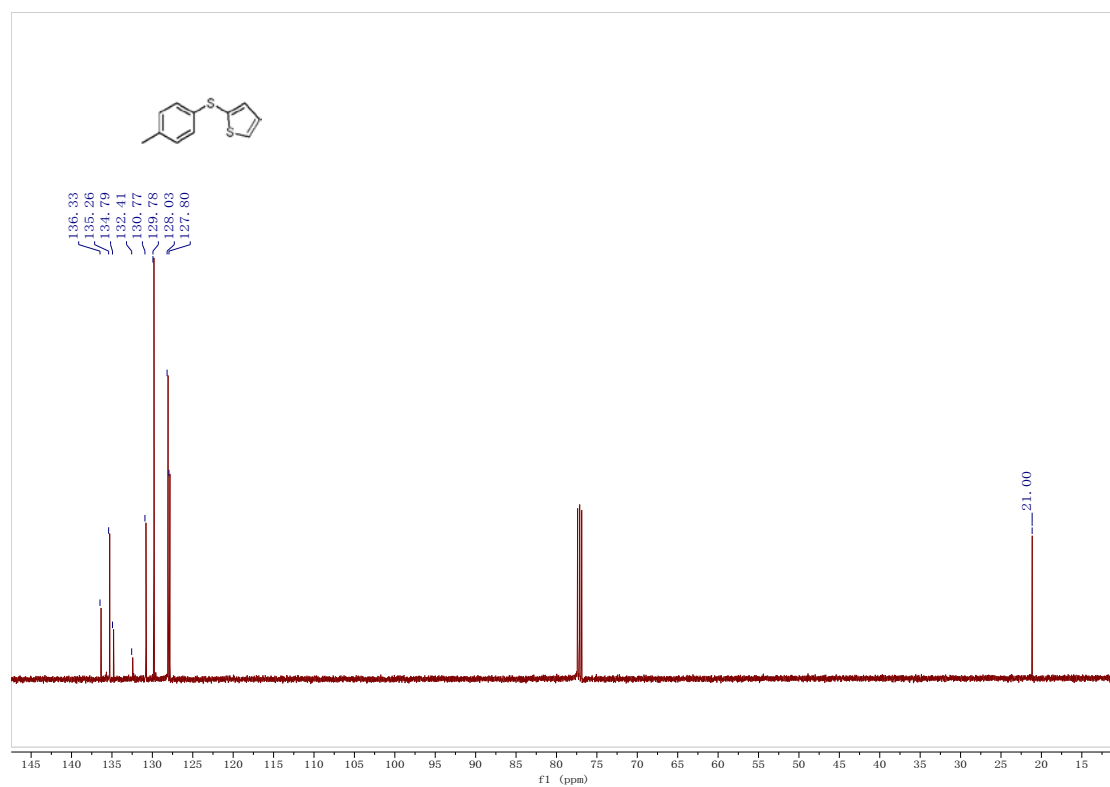

<sup>1</sup>H NMR Spectrum of **3cp** (500 MHz, CDCl<sub>3</sub>)

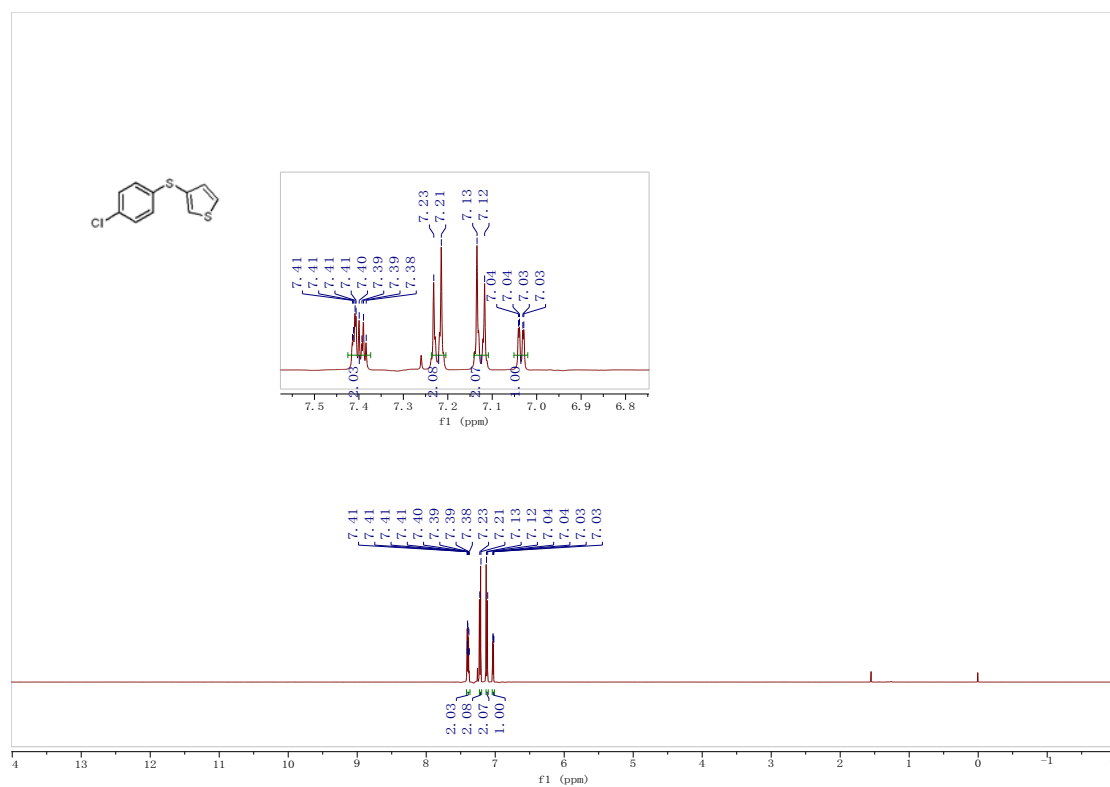

<sup>13</sup>C NMR Spectrum of **3cp** (101 MHz, CDCl<sub>3</sub>)

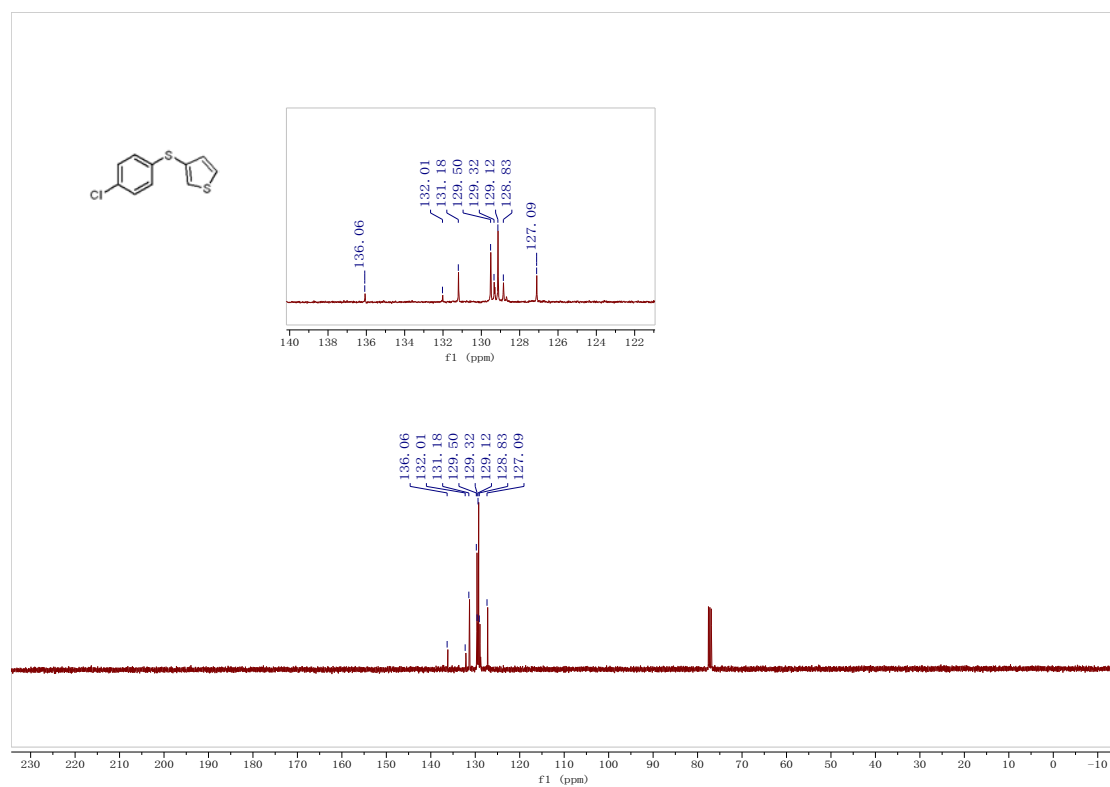

<sup>1</sup>H NMR Spectrum of **5** (500 MHz, CDCl<sub>3</sub>)

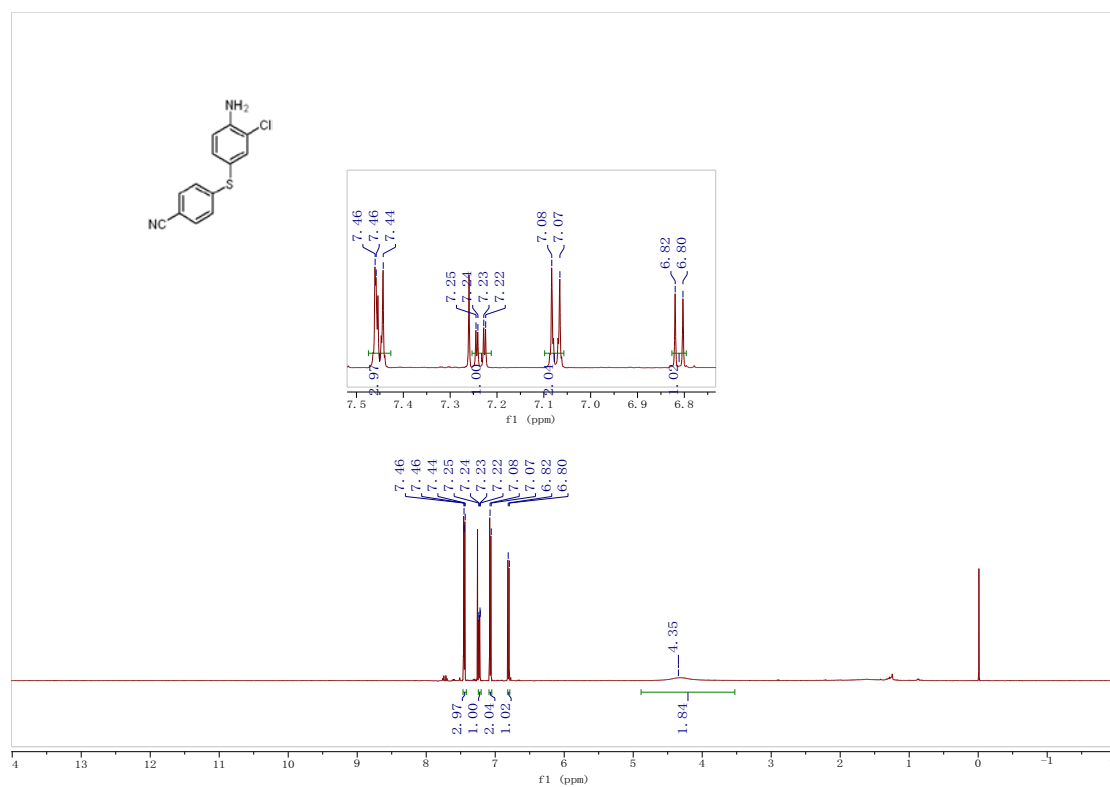

<sup>13</sup>C NMR Spectrum of **5** (500 MHz, CDCl<sub>3</sub>)

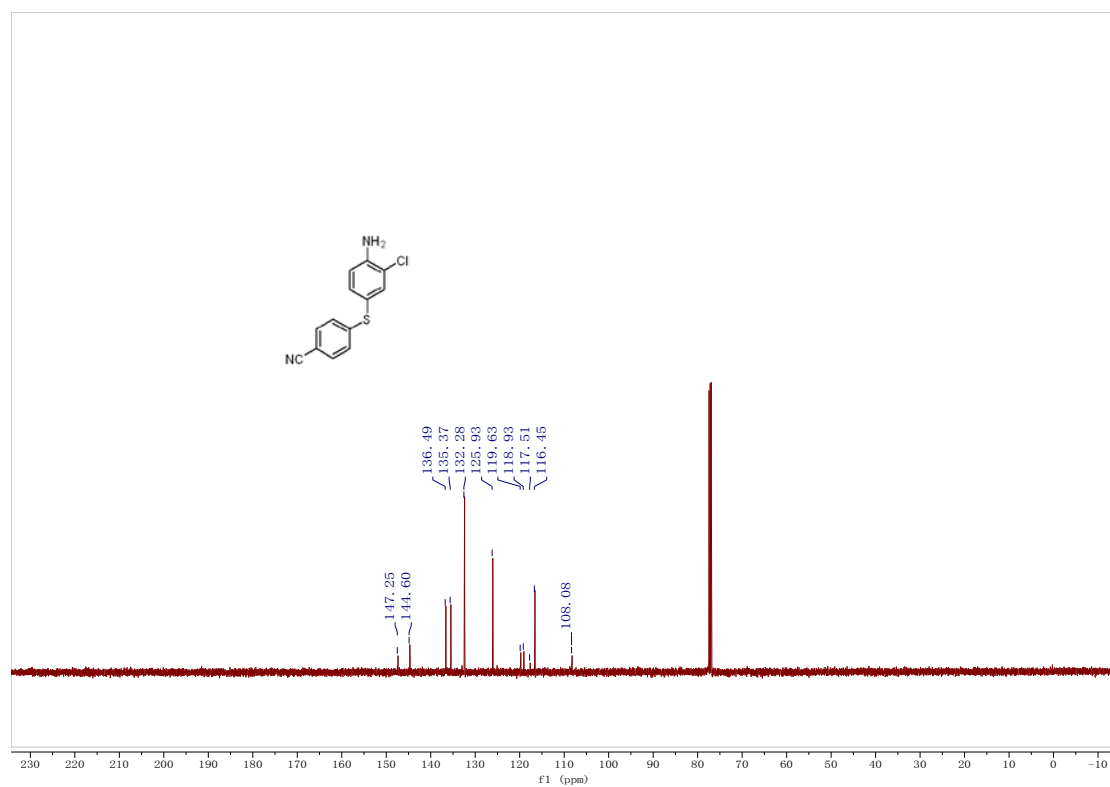

### <sup>1</sup>H NMR Spectrum of **8** (500 MHz, CDCl<sub>3</sub>)

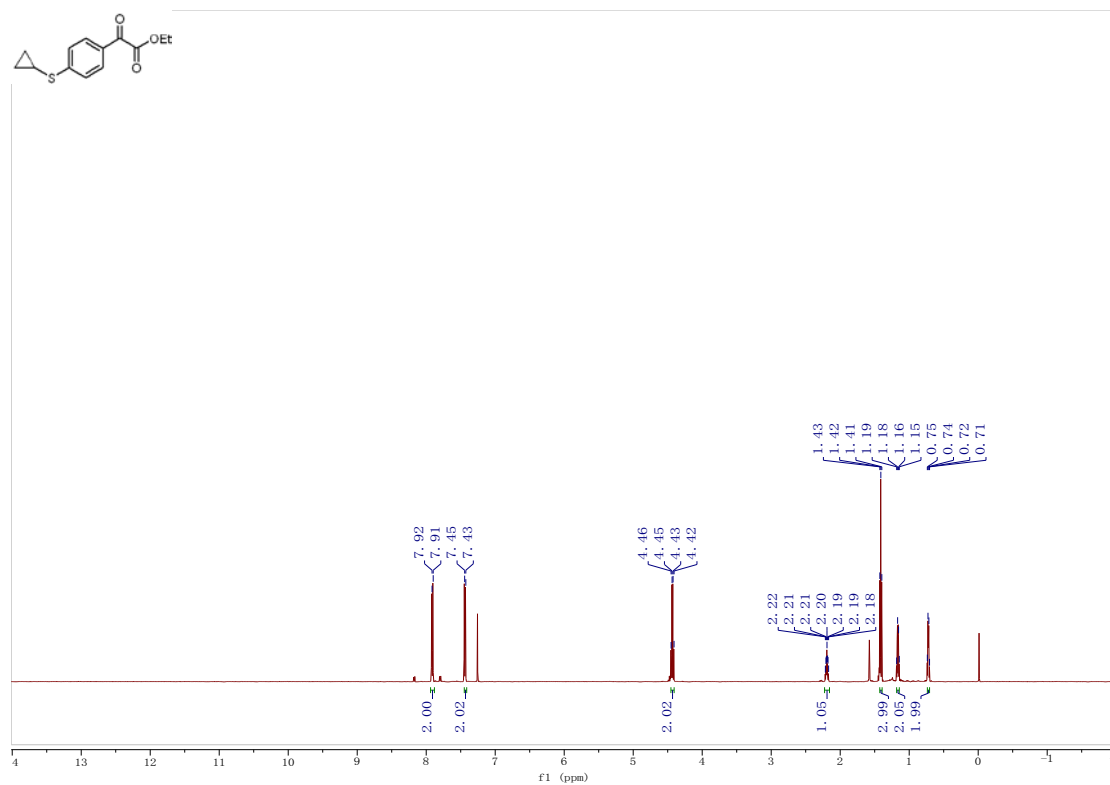

### <sup>13</sup>C NMR Spectrum of **8** (500 MHz, CDCl<sub>3</sub>)

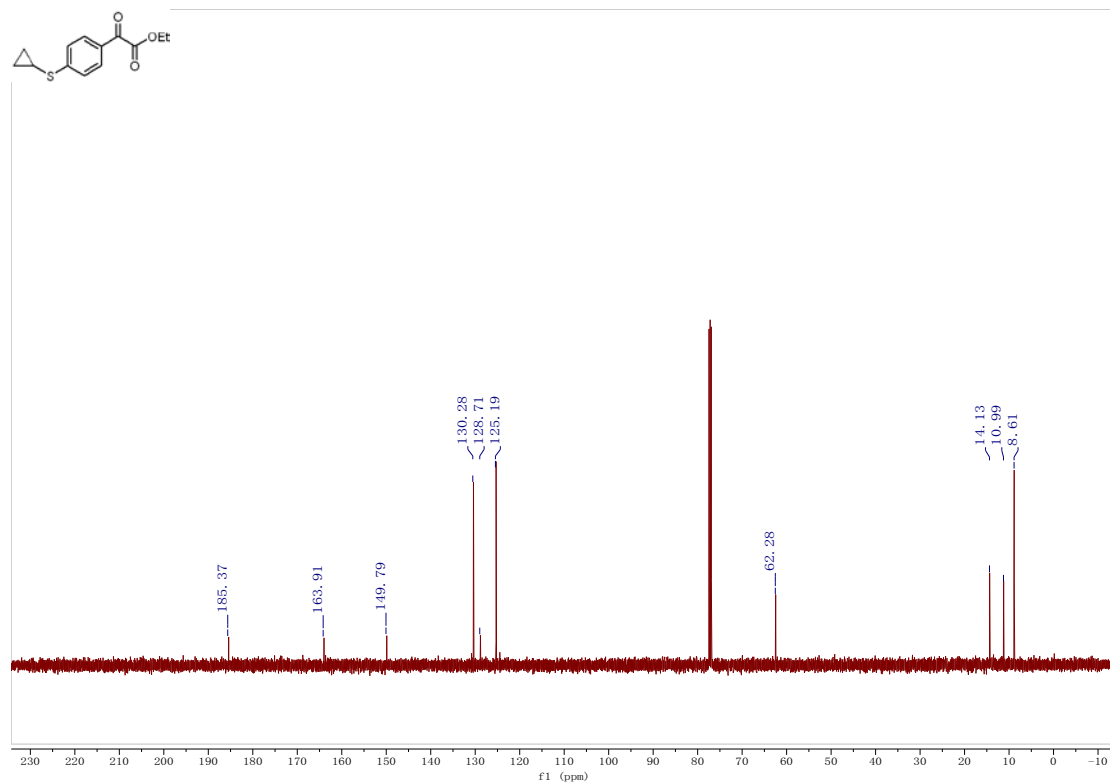

Supplement: d3gc02066e1.pdf [file d3gc02066e1.pdf]
